# Supplementary material for: Mechanistic insights into toxicity pathways induced by nanomaterials in Daphnia magna from analysis of the composition of the acquired protein corona
Source: Royal Society of Chemistry journal article supplement (doi:10.1039/d0en00625d), 2020-01-01
Supplement: d0en00625d1.xlsx [file d0en00625d1.xlsx]

## Sheet: Contents
	Appendix Raw data for: Mechanistic insights into toxicity pathways induced by nanomaterials in Daphnia magna from the composition of the acquired protein corona
				Laura-Jayne. A. Ellis and Iseult Lynch
	Contents	Description
	Workbook 1	Pristine TiO2 uncoated in HH combo media
	Workbook 2	Pristine TiO2 PVP in HH combo media
	Workbook 3	Pristine Uncoated Ag in HH combo media
	Workbook 4	Pristine PVP Ag in HH combo media
	Workbook 5	Pristine Ag2S in HH combo media
	Workbook 6	Pristine Bulk Ag in HH combo media
	Workbook 7	Aged TiO2 uncoated in HH combo
	Workbook 8	Aged TiO2 PVP in HH combo
	Workbook 9	Aged Uncoated Ag in HH combo media
	Workbook 10	Aged PVP Ag in HH combo media
	Workbook 11	Aged Ag2S in HH combo media
	Workbook 12	Pristine Bulk Ag in Class V water
	Workbook 13	Pristine TiO2 uncoated in Class V water
	Workbook 14	Pristine PVP Ag in Class V water
	Workbook 15	Pristine Ag2S in Class V water
	Workbook 16	Aged TiO2 Uncoated in Class V water
	Workbook 17	Aged TiO2 PVP in Class V water
	Workbook 18	Aged Uncoated Ag in Class V water
	Workbook 19	Aged PVP Ag in Class V water
	Workbook 20	Aged Ag2S in Class V water
	Workbook 21	Aged TiO2 Uncoated in Class I water
	Workbook 22	Aged TiO2 PVP in Class I water
	Workbook 23	Aged Uncoated Ag in Class I water
	Workbook 24	Aged PVP Ag in Class I water
	Workbook 25	Aged Ag2S in Class I water
	Workbook 26	Control in HH combo
	Workbook 27	Control in Class V

## Sheet: Workbook 1
Checked	Protein FDR Confidence	Master	Accession	Description	Exp. q-value	Sum PEP Score	Coverage	# Peptides	# PSMs	# Unique Peptides	# Protein Groups	# AAs	MW [kDa]	calc. pI	Score Sequest HT	# Peptides Sequest HT
FALSE		Master Protein	A0A162SIV5	Histone H4 OS=Daphnia magna GN=APZ42_011260 PE=3 SV=1		13.471	6.56168	3	7	3	1	381	42.4	8.47	24.73	3
	Checked	Confidence	Sequence	Modifications	Qvality PEP	Qvality q-value	# Protein Groups	# Proteins	# PSMs	Master Protein Accessions	# Missed Cleavages	Theo. MH+ [Da]	XCorr Sequest HT	Confidence Sequest HT	Percolator q-Value Sequest HT	Percolator PEP Sequest HT
	FALSE	High	ISGLIYEETR		0.116972	0	1	31	2	A0A162SIV5	0	1180.62	3.48	High	0	0.09262
	FALSE	High	DNIQGITKPAIR		0.0173125	0	1	29	2	A0A162SIV5	0	1325.75	3.73	High	0	0.01075
	FALSE	High	VLRDNIQGITKPAIR		0.00176652	0	1	29	3	A0A162SIV5	1	1694.01	4.7	High	0	0.000818371
FALSE		Master Protein	A0A083ZWQ6	Elongation factor Tu OS=Serratia sp. DD3 GN=tufA_2 PE=3 SV=1		5.726	3.80711	1	2	1	1	394	43.2	5.38	9.31	1
	Checked	Confidence	Sequence	Modifications	Qvality PEP	Qvality q-value	# Protein Groups	# Proteins	# PSMs	Master Protein Accessions	# Missed Cleavages	Theo. MH+ [Da]	XCorr Sequest HT	Confidence Sequest HT	Percolator q-Value Sequest HT	Percolator PEP Sequest HT
	FALSE	High	HYAHVDCPGHADYVK	1xCarbamidomethyl [C7]	0.00207049	0	1	7	2	A0A083ZWQ6	0	1768.79	5.34	High	0	0.0009809
FALSE		Master Protein	A0A0P6I5Q8	Histone H2A OS=Daphnia magna PE=3 SV=1		4.998	6.19469	1	2	1	1	226	24.4	10.9	7.44	1
	Checked	Confidence	Sequence	Modifications	Qvality PEP	Qvality q-value	# Protein Groups	# Proteins	# PSMs	Master Protein Accessions	# Missed Cleavages	Theo. MH+ [Da]	XCorr Sequest HT	Confidence Sequest HT	Percolator q-Value Sequest HT	Percolator PEP Sequest HT
	FALSE	High	ATIAGGGVIPHIHK		0.00232575	0	1	14	2	A0A0P6I5Q8	0	1370.79	3.73	High	0	0.009027
FALSE		Master Protein	A0A0N8CD53	Heat shock 70 kDa protein cognate OS=Daphnia magna PE=3 SV=1		3.988	2.45399	1	2	1	1	652	71	5.27	6.89	1
	Checked	Confidence	Sequence	Modifications	Qvality PEP	Qvality q-value	# Protein Groups	# Proteins	# PSMs	Master Protein Accessions	# Missed Cleavages	Theo. MH+ [Da]	XCorr Sequest HT	Confidence Sequest HT	Percolator q-Value Sequest HT	Percolator PEP Sequest HT
	FALSE	High	ATAGDTHLGGEDFDNR		0.00773204	0	1	13	2	A0A0N8CD53	0	1675.73	4.02	High	0	0.02377
FALSE		Master Protein	A0A0P6HT79	40S ribosomal protein S5 (Fragment) OS=Daphnia magna PE=3 SV=1		3.798	4.0107	1	2	1	1	374	42.3	9.96	5.99	1
	Checked	Confidence	Sequence	Modifications	Qvality PEP	Qvality q-value	# Protein Groups	# Proteins	# PSMs	Master Protein Accessions	# Missed Cleavages	Theo. MH+ [Da]	XCorr Sequest HT	Confidence Sequest HT	Percolator q-Value Sequest HT	Percolator PEP Sequest HT
	FALSE	High	TIAECLADELINAAK	1xCarbamidomethyl [C5]	0.00594087	0	1	61	2	A0A0P6HT79	0	1631.83	3.29	High	0	0.04949
FALSE		Master Protein	A0A0P6I1N2	ATP synthase subunit beta OS=Daphnia magna PE=3 SV=1		3.407	4.12044	2	3	2	1	631	67.1	6.05	8.78	2
	Checked	Confidence	Sequence	Modifications	Qvality PEP	Qvality q-value	# Protein Groups	# Proteins	# PSMs	Master Protein Accessions	# Missed Cleavages	Theo. MH+ [Da]	XCorr Sequest HT	Confidence Sequest HT	Percolator q-Value Sequest HT	Percolator PEP Sequest HT
	FALSE	High	IGLFGGAGVGK		0.167726	0	1	166	2	A0A0P6I1N2	0	975.562	3.06	High	0	0.1396
	FALSE	High	VALVYGQMNEPPGAR	1xOxidation [M8]	0.00526837	0	1	151	2	A0A0P6I1N2	0	1617.81	3	High	0	0.002805
FALSE		Master Protein	A0A0P6ITP2	Putative Elongation factor 1-alpha (Fragment) OS=Daphnia magna PE=4 SV=1		3.276	7.05882	1	2	1	1	170	18.4	8.56	6.15	1
	Checked	Confidence	Sequence	Modifications	Qvality PEP	Qvality q-value	# Protein Groups	# Proteins	# PSMs	Master Protein Accessions	# Missed Cleavages	Theo. MH+ [Da]	XCorr Sequest HT	Confidence Sequest HT	Percolator q-Value Sequest HT	Percolator PEP Sequest HT
	FALSE	High	AGPGDNVGMNIK		0.0289867	0	1	2	1	A0A0P6ITP2	0	1172.57	3.32	High	0	0.01922
	FALSE	High	AGPGDNVGMNIK	1xOxidation [M9]	0.0398295	0	1	2	1	A0A0P6ITP2	0	1188.57	2.83	High	0	0.02758
FALSE		Master Protein	A0A0P5S226	Putative Heat shock protein HSP 90-alpha OS=Daphnia magna PE=4 SV=1		2.742	3.01724	1	1	1	1	464	53.3	9.5	3.84	1
	Checked	Confidence	Sequence	Modifications	Qvality PEP	Qvality q-value	# Protein Groups	# Proteins	# PSMs	Master Protein Accessions	# Missed Cleavages	Theo. MH+ [Da]	XCorr Sequest HT	Confidence Sequest HT	Percolator q-Value Sequest HT	Percolator PEP Sequest HT
	FALSE	High	GVVDSENLPLNISR	1xDeamidated [N7]	0.00357582	0	1	2	1	A0A0P5S226	0	1513.79	3.84	High	0	0.001813
FALSE		Master Protein	A0A0P5ETT2	ATP synthase subunit alpha, mitochondrial OS=Daphnia magna PE=3 SV=1		2.569	3.36907	2	2	2	1	653	70.3	9.55	5.75	2
	Checked	Confidence	Sequence	Modifications	Qvality PEP	Qvality q-value	# Protein Groups	# Proteins	# PSMs	Master Protein Accessions	# Missed Cleavages	Theo. MH+ [Da]	XCorr Sequest HT	Confidence Sequest HT	Percolator q-Value Sequest HT	Percolator PEP Sequest HT
	FALSE	High	AVDSLVPLGR		0.117882	0	1	165	2	A0A0P5ETT2	0	1026.59	2.5	High	0	0.09367
	FALSE	High	VVDALGNPIDGK		0.0415641	0	1	97	1	A0A0P5ETT2	0	1197.65	3.25	High	0	0.02883
FALSE		Master Protein	A0A0P6FP80	Uncharacterized protein (Fragment) OS=Daphnia magna PE=4 SV=1		2.225	7.19424	1	3	1	1	139	15	5.45	11.31	1
	Checked	Confidence	Sequence	Modifications	Qvality PEP	Qvality q-value	# Protein Groups	# Proteins	# PSMs	Master Protein Accessions	# Missed Cleavages	Theo. MH+ [Da]	XCorr Sequest HT	Confidence Sequest HT	Percolator q-Value Sequest HT	Percolator PEP Sequest HT
	FALSE	High	YREIEVIHAR		0.0631659	0	1	1	3	A0A0P6FP80	1	1285.7	4.4	High	0	0.129
FALSE		Master Protein	A0A0P6IRU2	S-adenosylmethionine synthase OS=Daphnia magna PE=3 SV=1		1.795	3.82653	1	1	1	1	392	42.9	5.5	3.81	1
	Checked	Confidence	Sequence	Modifications	Qvality PEP	Qvality q-value	# Protein Groups	# Proteins	# PSMs	Master Protein Accessions	# Missed Cleavages	Theo. MH+ [Da]	XCorr Sequest HT	Confidence Sequest HT	Percolator q-Value Sequest HT	Percolator PEP Sequest HT
	FALSE	High	FVIGGPHGDAGLTGR		0.0246327	0	1	4	1	A0A0P6IRU2	0	1453.75	3.81	High	0	0.01602
FALSE		Master Protein	A0A0P5UH98	Transitional endoplasmic reticulum ATPase TER94 OS=Daphnia magna PE=3 SV=1		1.55	1.3544	1	1	1	1	886	98.5	5.78	2.65	1
	Checked	Confidence	Sequence	Modifications	Qvality PEP	Qvality q-value	# Protein Groups	# Proteins	# PSMs	Master Protein Accessions	# Missed Cleavages	Theo. MH+ [Da]	XCorr Sequest HT	Confidence Sequest HT	Percolator q-Value Sequest HT	Percolator PEP Sequest HT
	FALSE	High	GVLFYGPPGCGK	1xCarbamidomethyl [C10]	0.0406088	0	1	81	1	A0A0P5UH98	0	1251.62	2.65	High	0	0.02816
FALSE		Master Protein	A0A0P6JL94	Histone H2B (Fragment) OS=Daphnia magna PE=3 SV=1		1.444	4.34783	1	1	1	1	253	28.2	9.74	3.24	1
	Checked	Confidence	Sequence	Modifications	Qvality PEP	Qvality q-value	# Protein Groups	# Proteins	# PSMs	Master Protein Accessions	# Missed Cleavages	Theo. MH+ [Da]	XCorr Sequest HT	Confidence Sequest HT	Percolator q-Value Sequest HT	Percolator PEP Sequest HT
	FALSE	High	QVHPDTGISSK		0.0506467	0	1	67	1	A0A0P6JL94	0	1168.6	3.24	High	0	0.03601
FALSE		Master Protein	A0A0P6C200	GTP-binding nuclear protein OS=Daphnia magna PE=3 SV=1		1.26	3.32326	1	1	1	1	331	37.3	8.28	2.39	1
	Checked	Confidence	Sequence	Modifications	Qvality PEP	Qvality q-value	# Protein Groups	# Proteins	# PSMs	Master Protein Accessions	# Missed Cleavages	Theo. MH+ [Da]	XCorr Sequest HT	Confidence Sequest HT	Percolator q-Value Sequest HT	Percolator PEP Sequest HT
	FALSE	High	LVLVGDGGTGK		0.0734717	0	1	40	1	A0A0P6C200	0	1015.58	2.39	High	0	0.05499
FALSE		Master Protein	A0A0P6CWS8	40S ribosomal protein S19 OS=Daphnia magna PE=4 SV=1		1.244	9.28571	1	1	1	1	140	15.7	10.27	2.45	1
	Checked	Confidence	Sequence	Modifications	Qvality PEP	Qvality q-value	# Protein Groups	# Proteins	# PSMs	Master Protein Accessions	# Missed Cleavages	Theo. MH+ [Da]	XCorr Sequest HT	Confidence Sequest HT	Percolator q-Value Sequest HT	Percolator PEP Sequest HT
	FALSE	High	ELAPLDPNWYYLR	1xDeamidated [N8]	0.0757851	0	1	1	1	A0A0P6CWS8	0	1650.82	2.45	High	0	0.05697
FALSE		Master Protein	A0A0P5TRU4	Isocitrate dehydrogenase [NADP], mitochondrial OS=Daphnia magna PE=4 SV=1		1.213	2.31317	1	1	1	1	562	63	8	3.43	1
	Checked	Confidence	Sequence	Modifications	Qvality PEP	Qvality q-value	# Protein Groups	# Proteins	# PSMs	Master Protein Accessions	# Missed Cleavages	Theo. MH+ [Da]	XCorr Sequest HT	Confidence Sequest HT	Percolator q-Value Sequest HT	Percolator PEP Sequest HT
	FALSE	High	TVEAEAAHGTVTR		0.080946	0	1	44	1	A0A0P5TRU4	0	1341.68	3.43	High	0	0.06117
FALSE		Master Protein	A0A0N8DHB9	ATP-dependent RNA helicase DDX47 OS=Daphnia magna PE=3 SV=1		1.197	2.30769	1	1	1	1	520	58.6	8.97	2.2	1
	Checked	Confidence	Sequence	Modifications	Qvality PEP	Qvality q-value	# Protein Groups	# Proteins	# PSMs	Master Protein Accessions	# Missed Cleavages	Theo. MH+ [Da]	XCorr Sequest HT	Confidence Sequest HT	Percolator q-Value Sequest HT	Percolator PEP Sequest HT
	FALSE	High	DVIGLAETGSGK		0.0838189	0	1	43	1	A0A0N8DHB9	0	1146.6	2.2	High	0	0.0636
FALSE		Master Protein	A0A0P6BWF7	Tubulin beta chain OS=Daphnia magna PE=3 SV=1		1.136	2.24215	1	1	1	1	446	50.1	4.86	2.83	1
	Checked	Confidence	Sequence	Modifications	Qvality PEP	Qvality q-value	# Protein Groups	# Proteins	# PSMs	Master Protein Accessions	# Missed Cleavages	Theo. MH+ [Da]	XCorr Sequest HT	Confidence Sequest HT	Percolator q-Value Sequest HT	Percolator PEP Sequest HT
	FALSE	High	LAVNLIPFPR		0.0945182	0	1	26	1	A0A0P6BWF7	0	1139.69	2.83	High	0	0.07306
FALSE		Master Protein	A0A0P6IZE7	Ras-related protein Rab-11B OS=Daphnia magna PE=4 SV=1		1.076	3.29341	1	1	1	1	334	37.5	7.88	2.6	1
	Checked	Confidence	Sequence	Modifications	Qvality PEP	Qvality q-value	# Protein Groups	# Proteins	# PSMs	Master Protein Accessions	# Missed Cleavages	Theo. MH+ [Da]	XCorr Sequest HT	Confidence Sequest HT	Percolator q-Value Sequest HT	Percolator PEP Sequest HT
	FALSE	High	VVLIGDSGVGK		0.106997	0	1	17	1	A0A0P6IZE7	0	1043.61	2.6	High	0	0.08388
FALSE		Master Protein	A0A0N8DJ87	Chymotrypsin BI (Fragment) OS=Daphnia magna PE=3 SV=1		1.063	2.89855	1	1	1	1	483	50.9	4.53	2.74	1
	Checked	Confidence	Sequence	Modifications	Qvality PEP	Qvality q-value	# Protein Groups	# Proteins	# PSMs	Master Protein Accessions	# Missed Cleavages	Theo. MH+ [Da]	XCorr Sequest HT	Confidence Sequest HT	Percolator q-Value Sequest HT	Percolator PEP Sequest HT
	FALSE	High	TADGPGGISPTLQK		0.109939	0	1	59	1	A0A0N8DJ87	0	1341.7	2.74	High	0	0.08651
FALSE		Master Protein	A0A0P5F838	Putative ATP synthase subunit alpha, mitochondrial OS=Daphnia magna PE=4 SV=1		1.043	2.5641	1	1	1	1	390	42.8	9.1	3.13	1
	Checked	Confidence	Sequence	Modifications	Qvality PEP	Qvality q-value	# Protein Groups	# Proteins	# PSMs	Master Protein Accessions	# Missed Cleavages	Theo. MH+ [Da]	XCorr Sequest HT	Confidence Sequest HT	Percolator q-Value Sequest HT	Percolator PEP Sequest HT
	FALSE	High	IFLETELFYK		0.114727	0	1	2	1	A0A0P5F838	0	1302.7	3.13	High	0	0.09067
FALSE		Master Protein	A0A0P6JIK2	60S acidic ribosomal protein P1 OS=Daphnia magna PE=3 SV=1		0.99	3.83275	1	2	1	1	287	31.2	6.89	4.78	1
	Checked	Confidence	Sequence	Modifications	Qvality PEP	Qvality q-value	# Protein Groups	# Proteins	# PSMs	Master Protein Accessions	# Missed Cleavages	Theo. MH+ [Da]	XCorr Sequest HT	Confidence Sequest HT	Percolator q-Value Sequest HT	Percolator PEP Sequest HT
	FALSE	High	VEPYWPGLFAK		0.127382	0	1	55	2	A0A0P6JIK2	0	1306.68	2.5	High	0	0.1891
FALSE		Master Protein	A0A0P6C1N8	ADP-ribosylation factor OS=Daphnia magna PE=3 SV=1		0.967	4.52675	1	1	1	1	243	27.6	6.54	1.61	1
	Checked	Confidence	Sequence	Modifications	Qvality PEP	Qvality q-value	# Protein Groups	# Proteins	# PSMs	Master Protein Accessions	# Missed Cleavages	Theo. MH+ [Da]	XCorr Sequest HT	Confidence Sequest HT	Percolator q-Value Sequest HT	Percolator PEP Sequest HT
	FALSE	High	ILMVGLDAAGK	1xOxidation [M3]	0.133445	0	1	18	1	A0A0P6C1N8	0	1103.61	1.61	High	0	0.1078
FALSE		Master Protein	A0A0P6HPN6	Eukaryotic initiation factor 4A-II OS=Daphnia magna PE=3 SV=1		0.922	1.85874	1	1	1	1	538	61	6.98	2.69	1
	Checked	Confidence	Sequence	Modifications	Qvality PEP	Qvality q-value	# Protein Groups	# Proteins	# PSMs	Master Protein Accessions	# Missed Cleavages	Theo. MH+ [Da]	XCorr Sequest HT	Confidence Sequest HT	Percolator q-Value Sequest HT	Percolator PEP Sequest HT
	FALSE	High	VLITTDLLAR		0.146452	0	1	73	1	A0A0P6HPN6	0	1114.68	2.69	High	0	0.1196
FALSE		Master Protein	A0A0P5N1B5	Calcium-transporting ATPase type 2C member-like protein OS=Daphnia magna PE=4 SV=1		0.888	1.19474	1	1	1	1	837	90.5	4.83	2.91	1
	Checked	Confidence	Sequence	Modifications	Qvality PEP	Qvality q-value	# Protein Groups	# Proteins	# PSMs	Master Protein Accessions	# Missed Cleavages	Theo. MH+ [Da]	XCorr Sequest HT	Confidence Sequest HT	Percolator q-Value Sequest HT	Percolator PEP Sequest HT
	FALSE	High	LGDVIPADIK		0.157032	0	1	1	1	A0A0P5N1B5	0	1040.6	2.91	High	0	0.1295
FALSE		Master Protein	A0A0P6HPB9	Uncharacterized protein OS=Daphnia magna PE=4 SV=1		0.867	2.12014	1	1	1	1	566	63	5.05	2.38	1
	Checked	Confidence	Sequence	Modifications	Qvality PEP	Qvality q-value	# Protein Groups	# Proteins	# PSMs	Master Protein Accessions	# Missed Cleavages	Theo. MH+ [Da]	XCorr Sequest HT	Confidence Sequest HT	Percolator q-Value Sequest HT	Percolator PEP Sequest HT
	FALSE	High	NADLASGLAILR		0.163871	0	1	146	1	A0A0P6HPB9	0	1213.69	2.38	High	0	0.1357
FALSE		Master Protein	A0A0P5GB90	ATP-dependent RNA helicase DDX39A OS=Daphnia magna PE=4 SV=1		0.857	1.89036	1	1	1	1	529	60	6.11	2.27	1
	Checked	Confidence	Sequence	Modifications	Qvality PEP	Qvality q-value	# Protein Groups	# Proteins	# PSMs	Master Protein Accessions	# Missed Cleavages	Theo. MH+ [Da]	XCorr Sequest HT	Confidence Sequest HT	Percolator q-Value Sequest HT	Percolator PEP Sequest HT
	FALSE	High	DFLIKPEILR		0.167726	0	1	20	2	A0A0P5GB90	0	1243.74	2.27	High	0	0.1391
FALSE		Master Protein	A0A0P6JQN8	Peptidyl-prolyl cis-trans isomerase (Fragment) OS=Daphnia magna PE=3 SV=1		0.854	7.60234	1	1	1	1	171	18.4	8.46	2.22	1
	Checked	Confidence	Sequence	Modifications	Qvality PEP	Qvality q-value	# Protein Groups	# Proteins	# PSMs	Master Protein Accessions	# Missed Cleavages	Theo. MH+ [Da]	XCorr Sequest HT	Confidence Sequest HT	Percolator q-Value Sequest HT	Percolator PEP Sequest HT
	FALSE	High	GNGTGGESIYGEK		0.168377	0	1	4	1	A0A0P6JQN8	0	1268.58	2.22	High	0	0.1401
FALSE		Master Protein	A0A0P6C870	Polyadenylate-binding protein OS=Daphnia magna PE=3 SV=1		0.837	1.14943	1	1	1	1	783	87.3	9.51	2.61	1
	Checked	Confidence	Sequence	Modifications	Qvality PEP	Qvality q-value	# Protein Groups	# Proteins	# PSMs	Master Protein Accessions	# Missed Cleavages	Theo. MH+ [Da]	XCorr Sequest HT	Confidence Sequest HT	Percolator q-Value Sequest HT	Percolator PEP Sequest HT
	FALSE	High	SGVGNIFIK		0.174353	0	1	26	1	A0A0P6C870	0	934.536	2.61	High	0	0.1457
FALSE		Master Protein	A0A0P5QFN9	40S ribosomal protein S14 (Fragment) OS=Daphnia magna PE=3 SV=1		0.796	4.34783	1	1	1	1	299	32.4	10.42	2.66	1
	Checked	Confidence	Sequence	Modifications	Qvality PEP	Qvality q-value	# Protein Groups	# Proteins	# PSMs	Master Protein Accessions	# Missed Cleavages	Theo. MH+ [Da]	XCorr Sequest HT	Confidence Sequest HT	Percolator q-Value Sequest HT	Percolator PEP Sequest HT
	FALSE	High	TKTPGPGAQSALR		0.18987	0	1	91	1	A0A0P5QFN9	1	1283.71	2.66	High	0	0.1601
FALSE		Master Protein	A0A0P6IU74	ATP synthase subunit beta, mitochondrial-like protein (Fragment) OS=Daphnia magna PE=4 SV=1		0.789	7.63889	1	1	1	1	144	15.4	4.55	2.01	1
	Checked	Confidence	Sequence	Modifications	Qvality PEP	Qvality q-value	# Protein Groups	# Proteins	# PSMs	Master Protein Accessions	# Missed Cleavages	Theo. MH+ [Da]	XCorr Sequest HT	Confidence Sequest HT	Percolator q-Value Sequest HT	Percolator PEP Sequest HT
	FALSE	High	DVLLFIDNIFR		0.19209	0	1	1	1	A0A0P6IU74	0	1364.76	2.01	High	0	0.1625
FALSE		Master Protein	A0A0P6IAQ5	Isocitrate dehydrogenase [NADP], mitochondrial OS=Daphnia magna PE=4 SV=1		0.778	2.12766	1	1	1	1	517	57.6	8.4	3.03	1
	Checked	Confidence	Sequence	Modifications	Qvality PEP	Qvality q-value	# Protein Groups	# Proteins	# PSMs	Master Protein Accessions	# Missed Cleavages	Theo. MH+ [Da]	XCorr Sequest HT	Confidence Sequest HT	Percolator q-Value Sequest HT	Percolator PEP Sequest HT
	FALSE	High	LIDDMVAQGIK	1xOxidation [M5]	0.196609	0	1	70	1	A0A0P6IAQ5	0	1218.64	3.03	High	0	0.1669
FALSE		Master Protein	A0A164KIJ9	Uncharacterized protein OS=Daphnia magna GN=APZ42_034026 PE=4 SV=1		0.728	5.2356	1	2	1	1	191	22.5	8.53	0	1
	Checked	Confidence	Sequence	Modifications	Qvality PEP	Qvality q-value	# Protein Groups	# Proteins	# PSMs	Master Protein Accessions	# Missed Cleavages	Theo. MH+ [Da]	XCorr Sequest HT	Confidence Sequest HT	Percolator q-Value Sequest HT	Percolator PEP Sequest HT
	FALSE	High	EIANYDFYSK	1xDeamidated [N4]; 1xPhospho [S/Y]	0.217451	0	1	1	2	A0A164KIJ9	0	1330.52	0.72	High	0	0.187
FALSE		Master Protein	A0A0P6IGK0	40S ribosomal protein S27 (Fragment) OS=Daphnia magna PE=3 SV=1		0.723	3.75587	1	1	1	1	213	23.8	9.86	2.13	1
	Checked	Confidence	Sequence	Modifications	Qvality PEP	Qvality q-value	# Protein Groups	# Proteins	# PSMs	Master Protein Accessions	# Missed Cleavages	Theo. MH+ [Da]	XCorr Sequest HT	Confidence Sequest HT	Percolator q-Value Sequest HT	Percolator PEP Sequest HT
	FALSE	High	LTEGCSFR	1xCarbamidomethyl [C5]	0.219994	0	1	14	1	A0A0P6IGK0	0	969.446	2.13	High	0	0.1891

## Sheet: Workbook 2
Checked	Protein FDR Confidence	Master	Accession	Description	Exp. q-value	Sum PEP Score	Coverage	# Peptides	# PSMs	# Unique Peptides	# Protein Groups	# AAs	MW [kDa]	calc. pI	Score Sequest HT	# Peptides Sequest HT
FALSE		Master Protein	A0A162SIV5	Histone H4 OS=Daphnia magna GN=APZ42_011260 PE=3 SV=1		19.632	7.87402	5	7	5	1	381	42.4	8.47	24.59	5
	Checked	Confidence	Sequence	Modifications	Qvality PEP	Qvality q-value	# Protein Groups	# Proteins	# PSMs	Master Protein Accessions	# Missed Cleavages	Theo. MH+ [Da]	XCorr Sequest HT	Confidence Sequest HT	Percolator q-Value Sequest HT	Percolator PEP Sequest HT
	FALSE	High	ISGLIYEETR		0.0280917	0	1	31	1	A0A162SIV5	0	1180.62	3.42	High	0	0.01137
	FALSE	High	ISGLIYEETRGVLK		0.115628	0	1	25	1	A0A162SIV5	1	1577.89	2.83	High	0	0.08448
	FALSE	High	DNIQGITKPAIR		0.0109042	0	1	29	2	A0A162SIV5	0	1325.75	3.64	High	0	0.002938
	FALSE	High	RISGLIYEETR		0.0181322	0	1	31	1	A0A162SIV5	1	1336.72	3.36	High	0	0.006068
	FALSE	High	VLRDNIQGITKPAIR		5.74892e-07	0	1	29	2	A0A162SIV5	1	1694.01	4.39	High	0	2.23115e-09
FALSE		Master Protein	A0A083ZWQ6	Elongation factor Tu OS=Serratia sp. DD3 GN=tufA_2 PE=3 SV=1		13.267	3.80711	1	2	1	1	394	43.2	5.38	10.1	1
	Checked	Confidence	Sequence	Modifications	Qvality PEP	Qvality q-value	# Protein Groups	# Proteins	# PSMs	Master Protein Accessions	# Missed Cleavages	Theo. MH+ [Da]	XCorr Sequest HT	Confidence Sequest HT	Percolator q-Value Sequest HT	Percolator PEP Sequest HT
	FALSE	High	HYAHVDCPGHADYVK	1xCarbamidomethyl [C7]	9.04775e-07	0	1	7	2	A0A083ZWQ6	0	1768.79	5.13	High	0	1.266e-05
FALSE		Master Protein	A0A0P6I1N2	ATP synthase subunit beta OS=Daphnia magna PE=3 SV=1		9.315	6.33914	3	4	3	1	631	67.1	6.05	11.08	3
	Checked	Confidence	Sequence	Modifications	Qvality PEP	Qvality q-value	# Protein Groups	# Proteins	# PSMs	Master Protein Accessions	# Missed Cleavages	Theo. MH+ [Da]	XCorr Sequest HT	Confidence Sequest HT	Percolator q-Value Sequest HT	Percolator PEP Sequest HT
	FALSE	High	FTQAGSEVSALLGR		0.0034383	0	1	150	1	A0A0P6I1N2	0	1435.75	3.59	High	0	0.0005605
	FALSE	High	LGLFGGAGVGK		0.0890891	0	1	166	2	A0A0P6I1N2	0	975.562	2.69	High	0	0.05871
	FALSE	High	VALVYGQMNEPPGAR	1xOxidation [M8]	0.000269239	0	1	151	2	A0A0P6I1N2	0	1617.81	3.19	High	0	1.471e-05
FALSE		Master Protein	A0A0P5ZNU2	Putative 40S ribosomal protein S14 OS=Daphnia magna PE=4 SV=1		7.63	29.3478	3	3	3	1	92	9.8	11.18	10.15	3
	Checked	Confidence	Sequence	Modifications	Qvality PEP	Qvality q-value	# Protein Groups	# Proteins	# PSMs	Master Protein Accessions	# Missed Cleavages	Theo. MH+ [Da]	XCorr Sequest HT	Confidence Sequest HT	Percolator q-Value Sequest HT	Percolator PEP Sequest HT
	FALSE	High	TKTPGPGAQSALR		0.00414004	0	1	91	1	A0A0P5ZNU2	1	1283.71	3.74	High	0	0.0007351
	FALSE	High	TPGPGAQSALR		0.0216406	0	1	94	1	A0A0P5ZNU2	0	1054.56	2.78	High	0	0.007802
	FALSE	High	IEDVTPIPSESTRR		0.0137841	0	1	1	1	A0A0P5ZNU2	1	1599.83	3.63	High	0	0.004089
FALSE		Master Protein	A0A0N8B4E2	Putative 40S ribosomal protein S14 (Fragment) OS=Daphnia magna PE=3 SV=1		6.424	10.6061	2	2	2	1	132	14.6	11.58	7.37	2
	Checked	Confidence	Sequence	Modifications	Qvality PEP	Qvality q-value	# Protein Groups	# Proteins	# PSMs	Master Protein Accessions	# Missed Cleavages	Theo. MH+ [Da]	XCorr Sequest HT	Confidence Sequest HT	Percolator q-Value Sequest HT	Percolator PEP Sequest HT
	FALSE	High	IEDVTPIPTDSTR		0.00192645	0	1	1	1	A0A0N8B4E2	0	1443.73	3.79	High	0	0.0002451
	FALSE	High	IEDVTPIPTDSTRR		0.00694548	0	1	1	1	A0A0N8B4E2	1	1599.83	3.58	High	0	0.001538
FALSE		Master Protein	A0A0P6ITP2	Putative Elongation factor 1-alpha (Fragment) OS=Daphnia magna PE=4 SV=1		6.118	13.5294	2	3	2	1	170	18.4	8.56	8.64	2
	Checked	Confidence	Sequence	Modifications	Qvality PEP	Qvality q-value	# Protein Groups	# Proteins	# PSMs	Master Protein Accessions	# Missed Cleavages	Theo. MH+ [Da]	XCorr Sequest HT	Confidence Sequest HT	Percolator q-Value Sequest HT	Percolator PEP Sequest HT
	FALSE	High	AGPGDNVGMNIK		0.0120183	0	1	2	1	A0A0P6ITP2	0	1172.57	3.33	High	0	0.003363
	FALSE	High	AGPGDNVGMNIK	1xOxidation [M9]	0.0763151	0	1	2	1	A0A0P6ITP2	0	1188.57	2.67	High	0	0.04744
	FALSE	High	IKGVGDVLAGR		0.0153275	0	1	3	1	A0A0P6ITP2	1	1084.65	2.64	High	0	0.004774
FALSE		Master Protein	A0A0N8EN64	ATP synthase subunit alpha (Fragment) OS=Daphnia magna PE=3 SV=1		5.73	7.65766	3	3	1	1	444	48.5	8.18	9.49	3
	Checked	Confidence	Sequence	Modifications	Qvality PEP	Qvality q-value	# Protein Groups	# Proteins	# PSMs	Master Protein Accessions	# Missed Cleavages	Theo. MH+ [Da]	XCorr Sequest HT	Confidence Sequest HT	Percolator q-Value Sequest HT	Percolator PEP Sequest HT
	FALSE	High	HAVIFYDDLSK		0.00535048	0	1	5	1	A0A0N8EN64	0	1307.66	3.97	High	0	0.001057
	FALSE	High	AVDSLVPLGR		0.139177	0	2	165	2	A0A0P5ETT2; A0A0N8EN64	0	1026.59	2.52	High	0	0.1088
	FALSE	High	EAYPGDVFYLHSR		0.0359854	0	2	169	1	A0A0P5ETT2; A0A0N8EN64	0	1553.74	2.99	High	0	0.0162
FALSE		Master Protein	A0A0P5ETT2	ATP synthase subunit alpha, mitochondrial OS=Daphnia magna PE=3 SV=1		5.581	5.35988	3	3	1	1	653	70.3	9.55	8.8	3
	Checked	Confidence	Sequence	Modifications	Qvality PEP	Qvality q-value	# Protein Groups	# Proteins	# PSMs	Master Protein Accessions	# Missed Cleavages	Theo. MH+ [Da]	XCorr Sequest HT	Confidence Sequest HT	Percolator q-Value Sequest HT	Percolator PEP Sequest HT
	FALSE	High	AVDSLVPLGR		0.139177	0	2	165	2	A0A0P5ETT2; A0A0N8EN64	0	1026.59	2.52	High	0	0.1088
	FALSE	High	VVDALGNPIDGK		0.0067936	0	1	97	1	A0A0P5ETT2	0	1197.65	3.28	High	0	0.001488
	FALSE	High	EAYPGDVFYLHSR		0.0359854	0	2	169	1	A0A0P5ETT2; A0A0N8EN64	0	1553.74	2.99	High	0	0.0162
FALSE		Master Protein	A0A0N8CD53	Heat shock 70 kDa protein cognate OS=Daphnia magna PE=3 SV=1		5.229	2.45399	1	2	1	1	652	71	5.27	6.32	1
	Checked	Confidence	Sequence	Modifications	Qvality PEP	Qvality q-value	# Protein Groups	# Proteins	# PSMs	Master Protein Accessions	# Missed Cleavages	Theo. MH+ [Da]	XCorr Sequest HT	Confidence Sequest HT	Percolator q-Value Sequest HT	Percolator PEP Sequest HT
	FALSE	High	ATAGDTHLGGEDFDNR		0.00483305	0	1	13	2	A0A0N8CD53	0	1675.73	3.43	High	0	0.0009161
FALSE		Master Protein	A0A083ZX06	Carbamoyl-phosphate synthase large chain OS=Serratia sp. DD3 GN=carB PE=3 SV=1		4.685	1.39665	1	1	1	1	1074	117.5	5.38	3.79	1
	Checked	Confidence	Sequence	Modifications	Qvality PEP	Qvality q-value	# Protein Groups	# Proteins	# PSMs	Master Protein Accessions	# Missed Cleavages	Theo. MH+ [Da]	XCorr Sequest HT	Confidence Sequest HT	Percolator q-Value Sequest HT	Percolator PEP Sequest HT
	FALSE	High	TPASFEPSIDYVVTK		0.000340349	0	1	1	1	A0A083ZX06	0	1653.84	3.79	High	0	2.064e-05
FALSE		Master Protein	A0A0P6HGM8	Heat shock 70 kDa protein cognate OS=Daphnia magna PE=3 SV=1		4.512	1.91327	1	1	1	1	784	86.5	7.23	3.64	1
	Checked	Confidence	Sequence	Modifications	Qvality PEP	Qvality q-value	# Protein Groups	# Proteins	# PSMs	Master Protein Accessions	# Missed Cleavages	Theo. MH+ [Da]	XCorr Sequest HT	Confidence Sequest HT	Percolator q-Value Sequest HT	Percolator PEP Sequest HT
	FALSE	High	NQVAMNPINTVFDAK	1xOxidation [M5]	0.000449693	0	1	63	1	A0A0P6HGM8	0	1677.83	3.64	High	0	3.073e-05
FALSE		Master Protein	A0A0P5F4F0	60S ribosomal protein L13 OS=Daphnia magna PE=4 SV=1		4.483	6.38298	1	2	1	1	188	21.3	11.3	6.09	1
	Checked	Confidence	Sequence	Modifications	Qvality PEP	Qvality q-value	# Protein Groups	# Proteins	# PSMs	Master Protein Accessions	# Missed Cleavages	Theo. MH+ [Da]	XCorr Sequest HT	Confidence Sequest HT	Percolator q-Value Sequest HT	Percolator PEP Sequest HT
	FALSE	High	LAPTIGIAVDHR		0.00235061	0	1	1	2	A0A0P5F4F0	0	1262.72	3.77	High	0	0.0003262
FALSE		Master Protein	A0A0P6HT79	40S ribosomal protein S5 (Fragment) OS=Daphnia magna PE=3 SV=1		4.466	4.0107	1	1	1	1	374	42.3	9.96	3.03	1
	Checked	Confidence	Sequence	Modifications	Qvality PEP	Qvality q-value	# Protein Groups	# Proteins	# PSMs	Master Protein Accessions	# Missed Cleavages	Theo. MH+ [Da]	XCorr Sequest HT	Confidence Sequest HT	Percolator q-Value Sequest HT	Percolator PEP Sequest HT
	FALSE	High	TIAECLADELINAAK	1xCarbamidomethyl [C5]	0.000484802	0	1	61	1	A0A0P6HT79	0	1631.83	3.03	High	0	3.422e-05
FALSE		Master Protein	A0A0P6FP80	Uncharacterized protein (Fragment) OS=Daphnia magna PE=4 SV=1		3.644	7.19424	1	3	1	1	139	15	5.45	11.71	1
	Checked	Confidence	Sequence	Modifications	Qvality PEP	Qvality q-value	# Protein Groups	# Proteins	# PSMs	Master Protein Accessions	# Missed Cleavages	Theo. MH+ [Da]	XCorr Sequest HT	Confidence Sequest HT	Percolator q-Value Sequest HT	Percolator PEP Sequest HT
	FALSE	High	YREIEVIHAR		0.0102043	0	1	1	3	A0A0P6FP80	1	1285.7	4.15	High	0	0.08535
FALSE		Master Protein	A0A0P5S3K6	Eukaryotic initiation factor 4A-II OS=Daphnia magna PE=4 SV=1		3.441	4.87805	2	2	2	1	410	47	5.24	5.74	2
	Checked	Confidence	Sequence	Modifications	Qvality PEP	Qvality q-value	# Protein Groups	# Proteins	# PSMs	Master Protein Accessions	# Missed Cleavages	Theo. MH+ [Da]	XCorr Sequest HT	Confidence Sequest HT	Percolator q-Value Sequest HT	Percolator PEP Sequest HT
	FALSE	High	VLITTDLLAR		0.0769931	0	1	73	1	A0A0P5S3K6	0	1114.68	2.78	High	0	0.04803
	FALSE	High	RDELTLEGIK		0.021074	0	1	70	1	A0A0P5S3K6	1	1173.65	2.97	High	0	0.00754
FALSE		Master Protein	A0A0P6I5Q8	Histone H2A OS=Daphnia magna PE=3 SV=1		3.264	10.177	2	2	2	1	226	24.4	10.9	5.98	2
	Checked	Confidence	Sequence	Modifications	Qvality PEP	Qvality q-value	# Protein Groups	# Proteins	# PSMs	Master Protein Accessions	# Missed Cleavages	Theo. MH+ [Da]	XCorr Sequest HT	Confidence Sequest HT	Percolator q-Value Sequest HT	Percolator PEP Sequest HT
	FALSE	High	AGLQFPVGR		0.164546	0	1	67	1	A0A0P6I5Q8	0	944.531	3	High	0	0.136
	FALSE	High	ATIAGGGVIPHIHK		0.0135424	0	1	14	1	A0A0P6I5Q8	0	1370.79	2.98	High	0	0.004003
FALSE		Master Protein	A0A0P5TRU4	Isocitrate dehydrogenase [NADP], mitochondrial OS=Daphnia magna PE=4 SV=1		2.937	2.31317	1	2	1	1	562	63	8	6.14	1
	Checked	Confidence	Sequence	Modifications	Qvality PEP	Qvality q-value	# Protein Groups	# Proteins	# PSMs	Master Protein Accessions	# Missed Cleavages	Theo. MH+ [Da]	XCorr Sequest HT	Confidence Sequest HT	Percolator q-Value Sequest HT	Percolator PEP Sequest HT
	FALSE	High	TVEAEAAHGTVTR		0.0387949	0	1	44	2	A0A0P5TRU4	0	1341.68	3.23	High	0	0.01798
FALSE		Master Protein	A0A0N8DJ87	Chymotrypsin BI (Fragment) OS=Daphnia magna PE=3 SV=1		2.582	2.89855	1	1	1	1	483	50.9	4.53	2.94	1
	Checked	Confidence	Sequence	Modifications	Qvality PEP	Qvality q-value	# Protein Groups	# Proteins	# PSMs	Master Protein Accessions	# Missed Cleavages	Theo. MH+ [Da]	XCorr Sequest HT	Confidence Sequest HT	Percolator q-Value Sequest HT	Percolator PEP Sequest HT
	FALSE	High	TADGPGGISPTLQK		0.0100699	0	1	59	1	A0A0N8DJ87	0	1341.7	2.94	High	0	0.002616
FALSE		Master Protein	A0A0P6A486	Tubulin beta chain OS=Daphnia magna PE=3 SV=1		2.456	1.92678	1	1	1	1	519	56.8	7.77	3.21	1
	Checked	Confidence	Sequence	Modifications	Qvality PEP	Qvality q-value	# Protein Groups	# Proteins	# PSMs	Master Protein Accessions	# Missed Cleavages	Theo. MH+ [Da]	XCorr Sequest HT	Confidence Sequest HT	Percolator q-Value Sequest HT	Percolator PEP Sequest HT
	FALSE	High	LAVNIVPFPR		0.0123415	0	1	4	2	A0A0P6A486	0	1125.68	3.21	High	0	0.003502
FALSE		Master Protein	A0A0P6HYH6	Fructose-bisphosphate aldolase (Fragment) OS=Daphnia magna PE=3 SV=1		2.175	3.07692	1	1	1	1	455	49.2	5.97	3.19	1
	Checked	Confidence	Sequence	Modifications	Qvality PEP	Qvality q-value	# Protein Groups	# Proteins	# PSMs	Master Protein Accessions	# Missed Cleavages	Theo. MH+ [Da]	XCorr Sequest HT	Confidence Sequest HT	Percolator q-Value Sequest HT	Percolator PEP Sequest HT
	FALSE	High	GILAADESTATVGK		0.0194616	0	1	54	1	A0A0P6HYH6	0	1332.7	3.19	High	0	0.006688
FALSE		Master Protein	A0A0P5ETH9	Copper-zinc cu-zn superoxide dismutase OS=Daphnia magna PE=4 SV=1		2.022	0.515947	1	1	1	1	2132	239.9	6.86	2.81	1
	Checked	Confidence	Sequence	Modifications	Qvality PEP	Qvality q-value	# Protein Groups	# Proteins	# PSMs	Master Protein Accessions	# Missed Cleavages	Theo. MH+ [Da]	XCorr Sequest HT	Confidence Sequest HT	Percolator q-Value Sequest HT	Percolator PEP Sequest HT
	FALSE	High	LPVEVVEAEPK		0.0248202	0	1	131	1	A0A0P5ETH9	0	1209.67	2.81	High	0	0.009501
FALSE		Master Protein	A0A0P6C1N8	ADP-ribosylation factor OS=Daphnia magna PE=3 SV=1		1.987	4.52675	1	1	1	1	243	27.6	6.54	2.63	1
	Checked	Confidence	Sequence	Modifications	Qvality PEP	Qvality q-value	# Protein Groups	# Proteins	# PSMs	Master Protein Accessions	# Missed Cleavages	Theo. MH+ [Da]	XCorr Sequest HT	Confidence Sequest HT	Percolator q-Value Sequest HT	Percolator PEP Sequest HT
	FALSE	High	ILMVGLDAAGK	1xOxidation [M3]	0.0262888	0	1	18	1	A0A0P6C1N8	0	1103.61	2.63	High	0	0.0103
FALSE		Master Protein	A0A0P6B1Z7	Elongation factor 1-alpha OS=Daphnia magna PE=4 SV=1		1.8	1.71073	1	1	1	1	643	71.3	8.41	2.65	1
	Checked	Confidence	Sequence	Modifications	Qvality PEP	Qvality q-value	# Protein Groups	# Proteins	# PSMs	Master Protein Accessions	# Missed Cleavages	Theo. MH+ [Da]	XCorr Sequest HT	Confidence Sequest HT	Percolator q-Value Sequest HT	Percolator PEP Sequest HT
	FALSE	High	IGGIGTVPVGR		0.0355112	0	1	149	1	A0A0P6B1Z7	0	1025.61	2.65	High	0	0.01585
FALSE		Master Protein	A0A0P4XGX6	Heat shock protein HSP 90-alpha OS=Daphnia magna PE=3 SV=1		1.508	1.72626	1	1	1	1	811	93.3	5.22	2.35	1
	Checked	Confidence	Sequence	Modifications	Qvality PEP	Qvality q-value	# Protein Groups	# Proteins	# PSMs	Master Protein Accessions	# Missed Cleavages	Theo. MH+ [Da]	XCorr Sequest HT	Confidence Sequest HT	Percolator q-Value Sequest HT	Percolator PEP Sequest HT
	FALSE	High	GVVDSEDIPLNLSR		0.0567463	0	1	122	2	A0A0P4XGX6	0	1513.79	2.35	High	0	0.03101
FALSE		Master Protein	A0A0P6HEK9	ATP synthase subunit alpha, mitochondrial-like protein (Fragment) OS=Daphnia magna PE=4 SV=1		1.363	8.55615	1	1	1	1	187	19.8	8.65	2.57	1
	Checked	Confidence	Sequence	Modifications	Qvality PEP	Qvality q-value	# Protein Groups	# Proteins	# PSMs	Master Protein Accessions	# Missed Cleavages	Theo. MH+ [Da]	XCorr Sequest HT	Confidence Sequest HT	Percolator q-Value Sequest HT	Percolator PEP Sequest HT
	FALSE	High	TGAIVDVPVGPELLGR		0.0717338	0	1	2	1	A0A0P6HEK9	0	1592.9	2.57	High	0	0.04338
FALSE		Master Protein	A0A0P6BWF7	Tubulin beta chain OS=Daphnia magna PE=3 SV=1		1.355	2.24215	1	1	1	1	446	50.1	4.86	2.58	1
	Checked	Confidence	Sequence	Modifications	Qvality PEP	Qvality q-value	# Protein Groups	# Proteins	# PSMs	Master Protein Accessions	# Missed Cleavages	Theo. MH+ [Da]	XCorr Sequest HT	Confidence Sequest HT	Percolator q-Value Sequest HT	Percolator PEP Sequest HT
	FALSE	High	LAVNLIPFPR		0.0726918	0	1	26	1	A0A0P6BWF7	0	1139.69	2.58	High	0	0.04418
FALSE		Master Protein	A0A083ZU72	ATP synthase subunit beta OS=Serratia sp. DD3 GN=atpD_4 PE=3 SV=1		1.219	4.13043	1	1	1	1	460	50.2	5.06	1.93	1
	Checked	Confidence	Sequence	Modifications	Qvality PEP	Qvality q-value	# Protein Groups	# Proteins	# PSMs	Master Protein Accessions	# Missed Cleavages	Theo. MH+ [Da]	XCorr Sequest HT	Confidence Sequest HT	Percolator q-Value Sequest HT	Percolator PEP Sequest HT
	FALSE	High	NIASLGIYPAVDPLDSTSR	1xDeamidated [N1]	0.0906787	0	1	1	1	A0A083ZU72	0	1990.01	1.93	High	0	0.06042
FALSE		Master Protein	A0A0P6BM55	ATP-dependent zinc metalloprotease YME1L1 (Fragment) OS=Daphnia magna PE=4 SV=1		1.081	1.41343	1	1	1	1	849	93.1	7.17	2.48	1
	Checked	Confidence	Sequence	Modifications	Qvality PEP	Qvality q-value	# Protein Groups	# Proteins	# PSMs	Master Protein Accessions	# Missed Cleavages	Theo. MH+ [Da]	XCorr Sequest HT	Confidence Sequest HT	Percolator q-Value Sequest HT	Percolator PEP Sequest HT
	FALSE	High	GVLLVGPPGTGK		0.114106	0	1	64	1	A0A0P6BM55	0	1094.66	2.48	High	0	0.08307
FALSE		Master Protein	A0A0P6I1C0	Actin, alpha skeletal muscle OS=Daphnia magna PE=3 SV=1		1.042	1.45985	1	1	1	1	685	73.5	4.98	2.35	1
	Checked	Confidence	Sequence	Modifications	Qvality PEP	Qvality q-value	# Protein Groups	# Proteins	# PSMs	Master Protein Accessions	# Missed Cleavages	Theo. MH+ [Da]	XCorr Sequest HT	Confidence Sequest HT	Percolator q-Value Sequest HT	Percolator PEP Sequest HT
	FALSE	High	AGFAGDDAPR		0.121383	0	1	157	1	A0A0P6I1C0	0	976.448	2.35	High	0	0.09078
FALSE		Master Protein	A0A0P6JL94	Histone H2B (Fragment) OS=Daphnia magna PE=3 SV=1		1.009	4.34783	1	1	1	1	253	28.2	9.74	3.03	1
	Checked	Confidence	Sequence	Modifications	Qvality PEP	Qvality q-value	# Protein Groups	# Proteins	# PSMs	Master Protein Accessions	# Missed Cleavages	Theo. MH+ [Da]	XCorr Sequest HT	Confidence Sequest HT	Percolator q-Value Sequest HT	Percolator PEP Sequest HT
	FALSE	High	QVHPDTGISSK		0.128552	0	1	67	1	A0A0P6JL94	0	1168.6	3.03	High	0	0.09794
FALSE		Master Protein	A0A0P6IZE7	Ras-related protein Rab-11B OS=Daphnia magna PE=4 SV=1		0.951	3.29341	1	1	1	1	334	37.5	7.88	2.12	1
	Checked	Confidence	Sequence	Modifications	Qvality PEP	Qvality q-value	# Protein Groups	# Proteins	# PSMs	Master Protein Accessions	# Missed Cleavages	Theo. MH+ [Da]	XCorr Sequest HT	Confidence Sequest HT	Percolator q-Value Sequest HT	Percolator PEP Sequest HT
	FALSE	High	VVLIGDSGVGK		0.141654	0	1	17	1	A0A0P6IZE7	0	1043.61	2.12	High	0	0.1119
FALSE		Master Protein	A0A0P6B365	ATP-dependent RNA helicase DDX23 (Fragment) OS=Daphnia magna PE=4 SV=1		0.941	1.37615	1	1	1	1	872	100.1	9.28	2.18	1
	Checked	Confidence	Sequence	Modifications	Qvality PEP	Qvality q-value	# Protein Groups	# Proteins	# PSMs	Master Protein Accessions	# Missed Cleavages	Theo. MH+ [Da]	XCorr Sequest HT	Confidence Sequest HT	Percolator q-Value Sequest HT	Percolator PEP Sequest HT
	FALSE	High	DIIGVAETGSGK		0.144174	0	1	55	1	A0A0P6B365	0	1146.6	2.18	High	0	0.1146
FALSE		Master Protein	A0A084A6M8	Chaperone protein ClpB OS=Serratia sp. DD3 GN=clpB_1 PE=3 SV=1		0.875	1.51692	1	1	1	1	857	95.4	5.81	2.5	1
	Checked	Confidence	Sequence	Modifications	Qvality PEP	Qvality q-value	# Protein Groups	# Proteins	# PSMs	Master Protein Accessions	# Missed Cleavages	Theo. MH+ [Da]	XCorr Sequest HT	Confidence Sequest HT	Percolator q-Value Sequest HT	Percolator PEP Sequest HT
	FALSE	High	NNPVLIGEPGVGK		0.161674	0	1	1	1	A0A084A6M8	0	1293.72	2.5	High	0	0.1335
FALSE		Master Protein	A0A0P6AQ80	Gly d 3 OS=Daphnia magna PE=3 SV=1		0.847	2.09302	1	1	1	1	430	45.5	9.17	2.34	1
	Checked	Confidence	Sequence	Modifications	Qvality PEP	Qvality q-value	# Protein Groups	# Proteins	# PSMs	Master Protein Accessions	# Missed Cleavages	Theo. MH+ [Da]	XCorr Sequest HT	Confidence Sequest HT	Percolator q-Value Sequest HT	Percolator PEP Sequest HT
	FALSE	High	LSSPITNVR		0.169695	0	1	112	2	A0A0P6AQ80	0	986.563	2.34	High	0	0.1422
FALSE		Master Protein	A0A0N8DTA3	Tubulin alpha chain OS=Daphnia magna PE=3 SV=1		0.83	1.98807	1	1	1	1	503	55.4	5.14	2.15	1
	Checked	Confidence	Sequence	Modifications	Qvality PEP	Qvality q-value	# Protein Groups	# Proteins	# PSMs	Master Protein Accessions	# Missed Cleavages	Theo. MH+ [Da]	XCorr Sequest HT	Confidence Sequest HT	Percolator q-Value Sequest HT	Percolator PEP Sequest HT
	FALSE	High	DVNAAVATIK		0.175003	0	1	24	1	A0A0N8DTA3	0	1001.56	2.15	High	0	0.1479
FALSE		Master Protein	A0A0P6BKA5	NADH dehydrogenase [ubiquinone] iron-sulfur protein 7, mitochondrial OS=Daphnia magna PE=3 SV=1		0.814	2.51889	1	1	1	1	397	44.6	9.92	2.01	1
	Checked	Confidence	Sequence	Modifications	Qvality PEP	Qvality q-value	# Protein Groups	# Proteins	# PSMs	Master Protein Accessions	# Missed Cleavages	Theo. MH+ [Da]	XCorr Sequest HT	Confidence Sequest HT	Percolator q-Value Sequest HT	Percolator PEP Sequest HT
	FALSE	High	KVYDQMPEPR	1xOxidation [M6]	0.180475	0	1	39	1	A0A0P6BKA5	1	1278.61	2.01	High	0	0.1534
FALSE		Master Protein	A0A084A4L7	Cysteine synthase OS=Serratia sp. DD3 GN=cysM PE=3 SV=1		0.727	4.01338	1	1	1	1	299	32.1	6.34	2.28	1
	Checked	Confidence	Sequence	Modifications	Qvality PEP	Qvality q-value	# Protein Groups	# Proteins	# PSMs	Master Protein Accessions	# Missed Cleavages	Theo. MH+ [Da]	XCorr Sequest HT	Confidence Sequest HT	Percolator q-Value Sequest HT	Percolator PEP Sequest HT
	FALSE	High	AALAMIQQAEQR	1xDeamidated [Q11]	0.210468	0	1	1	1	A0A084A4L7	0	1330.68	2.28	High	0	0.1876
FALSE		Master Protein	A0A0P6C200	GTP-binding nuclear protein OS=Daphnia magna PE=3 SV=1		0.699	3.32326	1	1	1	1	331	37.3	8.28	2.55	1
	Checked	Confidence	Sequence	Modifications	Qvality PEP	Qvality q-value	# Protein Groups	# Proteins	# PSMs	Master Protein Accessions	# Missed Cleavages	Theo. MH+ [Da]	XCorr Sequest HT	Confidence Sequest HT	Percolator q-Value Sequest HT	Percolator PEP Sequest HT
	FALSE	High	LVLVGDGGTGK		0.221841	0	1	40	1	A0A0P6C200	0	1015.58	2.55	High	0	0.1998
FALSE		Master Protein	E9G0Y4	Uncharacterized protein OS=Daphnia pulex GN=DAPPUDRAFT_312470 PE=3 SV=1		0.669	7.80856	1	3	1	1	397	43.5	8.37	0	1
	Checked	Confidence	Sequence	Modifications	Qvality PEP	Qvality q-value	# Protein Groups	# Proteins	# PSMs	Master Protein Accessions	# Missed Cleavages	Theo. MH+ [Da]	XCorr Sequest HT	Confidence Sequest HT	Percolator q-Value Sequest HT	Percolator PEP Sequest HT
	FALSE	High	EQPDPPVPQSYAVTHGMWQAQVQVYPAYFQK	1xDeamidated [Q]; 1xOxidation [M17]	0.234845	0	1	1	3	E9G0Y4	0	3606.7	1.21	High	0	0.2143
FALSE		Master Protein	A0A0P5FIC0	Uncharacterized protein OS=Daphnia magna PE=4 SV=1		0.654	4.81586	1	2	1	1	353	37.1	10.24	0	1
	Checked	Confidence	Sequence	Modifications	Qvality PEP	Qvality q-value	# Protein Groups	# Proteins	# PSMs	Master Protein Accessions	# Missed Cleavages	Theo. MH+ [Da]	XCorr Sequest HT	Confidence Sequest HT	Percolator q-Value Sequest HT	Percolator PEP Sequest HT
	FALSE	High	KNNSQASNISIEIGTTK	3xDeamidated [N3; Q5; N8]; 1xPhospho [S]	0.241096	0	1	3	2	A0A0P5FIC0	1	1887.86	1.05	High	0	0.2264
FALSE		Master Protein	A0A0P5ZRW6	Putative 60S ribosomal protein L4-A (Fragment) OS=Daphnia magna PE=4 SV=1		0.607	2.1327	1	1	1	1	422	46.3	10.26	1.92	1
	Checked	Confidence	Sequence	Modifications	Qvality PEP	Qvality q-value	# Protein Groups	# Proteins	# PSMs	Master Protein Accessions	# Missed Cleavages	Theo. MH+ [Da]	XCorr Sequest HT	Confidence Sequest HT	Percolator q-Value Sequest HT	Percolator PEP Sequest HT
	FALSE	High	LGPLSIYGK		0.26429	0	1	1	1	A0A0P5ZRW6	0	947.556	1.92	High	0	0.2469
FALSE		Master Protein	A0A0P6BJG3	60S ribosomal protein L23 OS=Daphnia magna PE=3 SV=1		0.577	2.33918	1	1	1	1	342	36.9	9.99	2.18	1
	Checked	Confidence	Sequence	Modifications	Qvality PEP	Qvality q-value	# Protein Groups	# Proteins	# PSMs	Master Protein Accessions	# Missed Cleavages	Theo. MH+ [Da]	XCorr Sequest HT	Confidence Sequest HT	Percolator q-Value Sequest HT	Percolator PEP Sequest HT
	FALSE	High	ECADLWPR	1xCarbamidomethyl [C2]	0.279731	0	1	65	2	A0A0P6BJG3	0	1046.47	2.18	High	0	0.2646
FALSE		Master Protein	E9GPU8	Uncharacterized protein OS=Daphnia pulex GN=DAPPUDRAFT_320440 PE=4 SV=1		0.563	3.57143	1	1	1	1	448	48.5	7.96	0	1
	Checked	Confidence	Sequence	Modifications	Qvality PEP	Qvality q-value	# Protein Groups	# Proteins	# PSMs	Master Protein Accessions	# Missed Cleavages	Theo. MH+ [Da]	XCorr Sequest HT	Confidence Sequest HT	Percolator q-Value Sequest HT	Percolator PEP Sequest HT
	FALSE	High	SVPFAEAGENVGLLLR		0.288407	0	1	1	1	E9GPU8	0	1671.91	1.51	High	0	0.2736
FALSE		Master Protein	A0A0P5FAI8	Putative Disulfide-isomerase (Fragment) OS=Daphnia magna PE=4 SV=1		0.553	3.33333	1	1	1	1	330	36.6	5.12	1.74	1
	Checked	Confidence	Sequence	Modifications	Qvality PEP	Qvality q-value	# Protein Groups	# Proteins	# PSMs	Master Protein Accessions	# Missed Cleavages	Theo. MH+ [Da]	XCorr Sequest HT	Confidence Sequest HT	Percolator q-Value Sequest HT	Percolator PEP Sequest HT
	FALSE	High	TGGEIVNWLLK	1xDeamidated [N7]	0.293483	0	1	1	1	A0A0P5FAI8	0	1230.67	1.74	High	0	0.2797
FALSE		Master Protein	A0A0N8DRR6	Vascular endothelial growth factor receptor OS=Daphnia magna PE=3 SV=1		0.552	0.510856	1	1	1	1	1566	174.6	6.14	2.63	1
	Checked	Confidence	Sequence	Modifications	Qvality PEP	Qvality q-value	# Protein Groups	# Proteins	# PSMs	Master Protein Accessions	# Missed Cleavages	Theo. MH+ [Da]	XCorr Sequest HT	Confidence Sequest HT	Percolator q-Value Sequest HT	Percolator PEP Sequest HT
	FALSE	High	LADFGLAR		0.294766	0	1	296	2	A0A0N8DRR6	0	862.478	2.63	High	0	0.2803
FALSE		Master Protein	A0A0N8ECC5	Guanine nucleotide-binding protein subunit beta-2 1 OS=Daphnia magna PE=4 SV=1		0.523	2.51572	1	1	1	1	318	35.6	8.35	2.07	1
	Checked	Confidence	Sequence	Modifications	Qvality PEP	Qvality q-value	# Protein Groups	# Proteins	# PSMs	Master Protein Accessions	# Missed Cleavages	Theo. MH+ [Da]	XCorr Sequest HT	Confidence Sequest HT	Percolator q-Value Sequest HT	Percolator PEP Sequest HT
	FALSE	High	VWNLTNCK	1xCarbamidomethyl [C7]	0.311946	0	1	2	1	A0A0N8ECC5	0	1034.51	2.07	High	0	0.2997
FALSE		Master Protein	A0A0P5E875	Oxysterol-binding protein OS=Daphnia magna PE=4 SV=1		0.523	1.3369	1	1	1	1	748	84.4	7.21	0	1
	Checked	Confidence	Sequence	Modifications	Qvality PEP	Qvality q-value	# Protein Groups	# Proteins	# PSMs	Master Protein Accessions	# Missed Cleavages	Theo. MH+ [Da]	XCorr Sequest HT	Confidence Sequest HT	Percolator q-Value Sequest HT	Percolator PEP Sequest HT
	FALSE	High	QPHLLLKMAK	1xDeamidated [Q1]	0.311946	0	1	13	1	A0A0P5E875	1	1179.69	0.24	High	0	0.2997
FALSE		Master Protein	A0A0P6CER6	Zormin OS=Daphnia magna PE=4 SV=1		0.523	0.485306	1	1	1	1	3709	402.3	5.76	0	1
	Checked	Confidence	Sequence	Modifications	Qvality PEP	Qvality q-value	# Protein Groups	# Proteins	# PSMs	Master Protein Accessions	# Missed Cleavages	Theo. MH+ [Da]	XCorr Sequest HT	Confidence Sequest HT	Percolator q-Value Sequest HT	Percolator PEP Sequest HT
	FALSE	High	VSGHPLPVVKWFKDPPGK		0.311946	0	1	26	1	A0A0P6CER6	2	1988.11	1.95	High	0	0.2997

## Sheet: Workbook 3
Checked	Protein FDR Confidence	Master	Accession	Description	Exp. q-value	Sum PEP Score	Coverage	# Peptides	# PSMs	# Unique Peptides	# Protein Groups	# AAs	MW [kDa]	calc. pI	Score Sequest HT	# Peptides Sequest HT
FALSE	High	Master Protein	A0A162CE10	Putative Galactose-3-O-sulfotransferase 2 OS=Daphnia magna GN=APZ42_019998 PE=4 SV=1	0	16.5	10.579	9	10	3	1	1399	156.5	6.02	23.62	9
	Checked	Confidence	Sequence	Modifications	Qvality PEP	Qvality q-value	# Protein Groups	# Proteins	# PSMs	Master Protein Accessions	# Missed Cleavages	Theo. MH+ [Da]	XCorr Sequest HT	Confidence Sequest HT	Percolator q-Value Sequest HT	Percolator PEP Sequest HT
	FALSE	High	LDSTLPEQNNVAICQVR	1xCarbamidomethyl [C14]	0.0912941	0	1	23	1	A0A162CE10	0	1956.98	2.14	High	0	0.0828
	FALSE	High	LDATLPSQANQPICQVR	1xCarbamidomethyl [C14]	0.00584146	0	2	38	2	A0A0P5EPY5; A0A162CE10	0	1910.98	2.79	High	0	0.004723
	FALSE	High	LNALPGNTASTTVCTTMTPLR	1xOxidation [M17]; 1xCarbamidomethyl [C14]	0.0724493	0	2	27	1	A0A0P5EPY5; A0A162CE10	0	2235.11	1.67	High	0	0.06506
	FALSE	High	EMGICLDSGSCTLGGGR	1xOxidation [M2]; 2xCarbamidomethyl [C5; C11]	0.00130242	0	2	33	1	A0A0P5EPY5; A0A162CE10	0	1785.76	3.12	High	0	0.0009904
	FALSE	High	ILAPPDCLQYFTTR	1xCarbamidomethyl [C7]	0.0342172	0	2	37	1	A0A0P5EPY5; A0A162CE10	0	1694.86	2.17	High	0	0.02977
	FALSE	High	QLANQDYSICFR	1xCarbamidomethyl [C10]	0.0845371	0	4	182	1	A0A0P5EPY5; A0A0P4ZJY8; A0A0P5N5W7; A0A162CE10	0	1514.71	2.01	High	0	0.07637
	FALSE	High	TNRDETVTTPTADSTTNGNR	1xDeamidated [N17]	0.0919057	0	1	12	1	A0A162CE10	1	2151.97	3.4	High	0	0.08346
	FALSE	High	TIAPSSSCTLTVK	1xCarbamidomethyl [C8]	0.149854	0	2	36	1	A0A0P5EPY5; A0A162CE10	0	1364.71	2.32	High	0	0.1387
	FALSE	High	EMGNCFDSTTCTTIGGR	1xOxidation [M2]; 2xCarbamidomethyl [C5; C11]	0.00146256	0	1	8	1	A0A162CE10	0	1922.77	3.05	High	0	0.001116
FALSE	High	Master Protein	A0A0P5N975	Clip-domain serine protease OS=Daphnia magna PE=4 SV=1	0	14.674	14.3141	6	10	4	1	503	54.2	6.62	26.93	6
	Checked	Confidence	Sequence	Modifications	Qvality PEP	Qvality q-value	# Protein Groups	# Proteins	# PSMs	Master Protein Accessions	# Missed Cleavages	Theo. MH+ [Da]	XCorr Sequest HT	Confidence Sequest HT	Percolator q-Value Sequest HT	Percolator PEP Sequest HT
	FALSE	High	VDVPVLDSNDCEQR	1xCarbamidomethyl [C11]	0.0534937	0	1	61	1	A0A0P5N975	0	1645.75	2.32	High	0	0.04748
	FALSE	High	VANFGNGVGLK	1xDeamidated [N6]	0.01029	0	2	100	1	A0A0P5N975; A0A0P5NSN3	0	1076.57	2.86	High	0	0.008497
	FALSE	High	SNIIPTPGYNLDVTQAR		0.00367337	0	2	92	2	A0A0P5N975; A0A0P5NSN3	0	1858.97	2.79	High	0	0.02508
	FALSE	High	LGPFFQLSR		0.0454814	0	1	64	2	A0A0P5N975	0	1064.59	2.57	High	0	0.03997
	FALSE	High	KVDVPVLDSNDCEQR	1xCarbamidomethyl [C12]	0.00647084	0	1	61	2	A0A0P5N975	1	1773.84	4.21	High	0	0.005249
	FALSE	High	KDPSLKPNPYVPEVDSTSEK		0.0524204	0	1	85	2	A0A0P5N975	1	2230.12	2.78	High	0	0.04644
FALSE	High	Master Protein	A0A0P5EPY5	Uncharacterized protein OS=Daphnia magna PE=4 SV=1	0	13.152	20.2847	7	8	1	1	562	61.6	6.42	17.5	7
	Checked	Confidence	Sequence	Modifications	Qvality PEP	Qvality q-value	# Protein Groups	# Proteins	# PSMs	Master Protein Accessions	# Missed Cleavages	Theo. MH+ [Da]	XCorr Sequest HT	Confidence Sequest HT	Percolator q-Value Sequest HT	Percolator PEP Sequest HT
	FALSE	High	LDATLPSQANQPICQVR	1xCarbamidomethyl [C14]	0.00584146	0	2	38	2	A0A0P5EPY5; A0A162CE10	0	1910.98	2.79	High	0	0.004723
	FALSE	High	LNALPGNTASTTVCTTMTPLR	1xOxidation [M17]; 1xCarbamidomethyl [C14]	0.0724493	0	2	27	1	A0A0P5EPY5; A0A162CE10	0	2235.11	1.67	High	0	0.06506
	FALSE	High	EMGICLDSGSCTLGGGR	1xOxidation [M2]; 2xCarbamidomethyl [C5; C11]	0.00130242	0	2	33	1	A0A0P5EPY5; A0A162CE10	0	1785.76	3.12	High	0	0.0009904
	FALSE	High	ILAPPDCLQYFTTR	1xCarbamidomethyl [C7]	0.0342172	0	2	37	1	A0A0P5EPY5; A0A162CE10	0	1694.86	2.17	High	0	0.02977
	FALSE	High	QLANQDYSICFR	1xCarbamidomethyl [C10]	0.0845371	0	4	182	1	A0A0P5EPY5; A0A0P4ZJY8; A0A0P5N5W7; A0A162CE10	0	1514.71	2.01	High	0	0.07637
	FALSE	High	TNRDETVTTPTADTTTNGNR	1xDeamidated [N17]	0.0202057	0	1	14	1	A0A0P5EPY5	1	2165.99	2.48	High	0	0.0172
	FALSE	High	TIAPSSSCTLTVK	1xCarbamidomethyl [C8]	0.149854	0	2	36	1	A0A0P5EPY5; A0A162CE10	0	1364.71	2.32	High	0	0.1387
FALSE	High	Master Protein	A0A0P6E3C1	Uncharacterized protein (Fragment) OS=Daphnia magna PE=4 SV=1	0	9.936	29.5775	4	4	1	1	213	23.8	4.79	9.29	4
	Checked	Confidence	Sequence	Modifications	Qvality PEP	Qvality q-value	# Protein Groups	# Proteins	# PSMs	Master Protein Accessions	# Missed Cleavages	Theo. MH+ [Da]	XCorr Sequest HT	Confidence Sequest HT	Percolator q-Value Sequest HT	Percolator PEP Sequest HT
	FALSE	High	NLDGSSQWNYAQSDYTTR		0.00181935	0	1	67	2	A0A0P6E3C1	0	2105.92	3.12	High	0	0.001402
	FALSE	High	NLDGSSQWSYAQSDYTTR		4.86157e-05	0	4	298	2	A0A164PJ92; E9GSV4; A0A0P5XKN4; A0A0P6E3C1	0	2078.91	3.54	High	0	3.226e-05
	FALSE	High	FTLTWTADDAGFQPK		0.0183685	0	2	159	1	A0A0P5LEG9; A0A0P6E3C1	0	1697.82	2.62	High	0	0.01554
	FALSE	High	GSSYWVSPEGQK		0.176733	0	4	250	1	A0A0P6G074; A0A0P6G7T8; A0A0P5RR94; A0A0P6E3C1	0	1324.62	1.59	High	0	0.1649
FALSE	High	Master Protein	A0A0P5DUG5	Cuticular protein analogous to peritrophins 3-E (Fragment) OS=Daphnia magna PE=4 SV=1	0	9.315	14.7766	4	5	4	1	291	32.1	5.66	15.11	4
	Checked	Confidence	Sequence	Modifications	Qvality PEP	Qvality q-value	# Protein Groups	# Proteins	# PSMs	Master Protein Accessions	# Missed Cleavages	Theo. MH+ [Da]	XCorr Sequest HT	Confidence Sequest HT	Percolator q-Value Sequest HT	Percolator PEP Sequest HT
	FALSE	High	DGVAEEVTCPDGLLVNEK	1xCarbamidomethyl [C9]	0.00362359	0	1	17	1	A0A0P5DUG5	0	1944.92	3.3	High	0	0.002873
	FALSE	High	YFVCVEGNKPR	1xCarbamidomethyl [C4]	0.0681936	0	1	32	2	A0A0P5DUG5	0	1368.67	2.76	High	0	0.06102
	FALSE	High	YPCDYPNEVDCGKR	2xCarbamidomethyl [C3; C11]	0.00110572	0	1	32	1	A0A0P5DUG5	1	1772.74	4.33	High	0	0.0008333
	FALSE	High	YPCDYPNEVDCGK	2xCarbamidomethyl [C3; C11]	0.0253781	0	1	32	1	A0A0P5DUG5	0	1616.64	2.81	High	0	0.02179
FALSE	High	Master Protein	A0A0P6HQA8	Chorion peroxidase OS=Daphnia magna PE=4 SV=1	0	8.508	8.70712	5	6	3	1	758	85.9	8.5	14.14	5
	Checked	Confidence	Sequence	Modifications	Qvality PEP	Qvality q-value	# Protein Groups	# Proteins	# PSMs	Master Protein Accessions	# Missed Cleavages	Theo. MH+ [Da]	XCorr Sequest HT	Confidence Sequest HT	Percolator q-Value Sequest HT	Percolator PEP Sequest HT
	FALSE	High	FGHSLIPNALER		0.0780042	0	2	44	1	A0A0P6GQ12; A0A0P6HQA8	0	1353.73	2.5	High	0	0.07029
	FALSE	High	DETSGFGSDLASLNIQR		0.000629843	0	2	38	1	A0A0P6GQ12; A0A0P6HQA8	0	1809.86	3.11	High	0	0.0004643
	FALSE	High	LLPPNFQDGVSAPR		0.0851048	0	1	40	1	A0A0P6HQA8	0	1510.8	1.94	High	0	0.07698
	FALSE	High	HTAINQYCPVR	1xCarbamidomethyl [C8]	0.0505078	0	1	34	2	A0A0P6HQA8	0	1358.66	2.6	High	0	0.1663
	FALSE	High	DLSDIEIDVLGR		0.177871	0	1	30	1	A0A0P6HQA8	0	1344.7	1.71	High	0	0.1663
FALSE	High	Master Protein	A0A0P6BZT8	Uncharacterized protein OS=Daphnia magna PE=4 SV=1	0	8.399	3.90016	2	9	2	1	641	67.6	4.96	18.78	2
	Checked	Confidence	Sequence	Modifications	Qvality PEP	Qvality q-value	# Protein Groups	# Proteins	# PSMs	Master Protein Accessions	# Missed Cleavages	Theo. MH+ [Da]	XCorr Sequest HT	Confidence Sequest HT	Percolator q-Value Sequest HT	Percolator PEP Sequest HT
	FALSE	High	LVEQLAKPICQIR	1xCarbamidomethyl [C10]	0.00327115	0	1	71	2	A0A0P6BZT8	0	1567.9	3.27	High	0	0.002582
	FALSE	High	QLNNQNYNICFR	1xCarbamidomethyl [C10]	0.00736631	0	1	229	3	A0A0P6BZT8	0	1583.74	3.63	High	0	0.006012
	FALSE	High	QLNNQNYNICFR	1xCarbamidomethyl [C10]; 1xDeamidated [N/Q]	0.0538562	0	1	229	4	A0A0P6BZT8	0	1584.72	3.02	High	0	0.04781
FALSE	High	Master Protein	A0A165AGX3	Uncharacterized protein OS=Daphnia magna GN=APZ42_016491 PE=4 SV=1	0	8.153	9.55752	5	6	5	1	565	61.8	8.05	12.92	5
	Checked	Confidence	Sequence	Modifications	Qvality PEP	Qvality q-value	# Protein Groups	# Proteins	# PSMs	Master Protein Accessions	# Missed Cleavages	Theo. MH+ [Da]	XCorr Sequest HT	Confidence Sequest HT	Percolator q-Value Sequest HT	Percolator PEP Sequest HT
	FALSE	High	APNGASTSVQLCTPIKPFK	1xCarbamidomethyl [C12]; 1xDeamidated [N3]	0.0174536	0	1	11	2	A0A165AGX3	0	2017.04	3.93	High	0	0.01478
	FALSE	High	SATDSITGLAGDRFCGEHLNTAR	1xCarbamidomethyl [C15]	0.0533133	0	1	11	1	A0A165AGX3	1	2449.15	2.38	High	0	0.04723
	FALSE	High	FCGEHLNTAR	1xCarbamidomethyl [C2]	0.110361	0	1	11	1	A0A165AGX3	0	1204.55	1.76	High	0	0.1008
	FALSE	High	SATDSITGLAGDR		0.00206407	0	1	11	1	A0A165AGX3	0	1263.62	3.71	High	0	0.001598
	FALSE	High	QLNNQNYNACFR	1xCarbamidomethyl [C10]	0.0698187	0	1	13	1	A0A165AGX3	0	1541.69	2.32	High	0	0.06252
FALSE	High	Master Protein	A0A0N8BAU8	Uncharacterized protein (Fragment) OS=Daphnia magna PE=4 SV=1	0	8.05	25.1185	4	4	3	1	211	22.5	5.02	9.52	4
	Checked	Confidence	Sequence	Modifications	Qvality PEP	Qvality q-value	# Protein Groups	# Proteins	# PSMs	Master Protein Accessions	# Missed Cleavages	Theo. MH+ [Da]	XCorr Sequest HT	Confidence Sequest HT	Percolator q-Value Sequest HT	Percolator PEP Sequest HT
	FALSE	High	APEITIVSQSDVR		0.0374977	0	2	63	1	A0A0N8BAU8; A0A0P4Z0Z8	0	1414.75	3.71	High	0	0.03271
	FALSE	High	NIDGSGAWSYAGSDGTTR		0.0230732	0	1	28	2	A0A0N8BAU8	0	1814.79	1.57	High	0	0.01973
	FALSE	High	ITLTWVADDAGFQPK		0.00627522	0	1	47	2	A0A0N8BAU8	0	1661.85	3.19	High	0	0.005077
	FALSE	High	NIDGSGAWSYAGSDGTTRDEAYAQK		0.00344287	0	1	24	1	A0A0N8BAU8	1	2620.15	2.63	High	0	0.002723
FALSE	High	Master Protein	A0A164PJ92	Uncharacterized protein OS=Daphnia magna GN=APZ42_029389 PE=4 SV=1	0	7.75	14.2029	3	3	2	1	345	38.2	6.74	7.98	3
	Checked	Confidence	Sequence	Modifications	Qvality PEP	Qvality q-value	# Protein Groups	# Proteins	# PSMs	Master Protein Accessions	# Missed Cleavages	Theo. MH+ [Da]	XCorr Sequest HT	Confidence Sequest HT	Percolator q-Value Sequest HT	Percolator PEP Sequest HT
	FALSE	High	NLDGSSQWSYAQSDYTTR		4.86157e-05	0	4	298	2	A0A164PJ92; E9GSV4; A0A0P5XKN4; A0A0P6E3C1	0	2078.91	3.54	High	0	3.226e-05
	FALSE	High	NLDGSSAWSYAGSDGTTR		0.00891667	0	1	11	1	A0A164PJ92	0	1844.8	2.36	High	0	0.007342
	FALSE	High	APEITIVSQSDER		0.0831336	0	1	14	1	A0A164PJ92	0	1444.73	2.09	High	0	0.07507
FALSE	High	Master Protein	A0A0P5NSN3	Clip-domain serine protease (Fragment) OS=Daphnia magna PE=4 SV=1	0	7.352	8.33333	3	4	1	1	348	36.7	6.29	10.21	3
	Checked	Confidence	Sequence	Modifications	Qvality PEP	Qvality q-value	# Protein Groups	# Proteins	# PSMs	Master Protein Accessions	# Missed Cleavages	Theo. MH+ [Da]	XCorr Sequest HT	Confidence Sequest HT	Percolator q-Value Sequest HT	Percolator PEP Sequest HT
	FALSE	High	VANFGNGVGLK	1xDeamidated [N6]	0.01029	0	2	100	1	A0A0P5N975; A0A0P5NSN3	0	1076.57	2.86	High	0	0.008497
	FALSE	High	SNIIPTPGYNLDVTQAR		0.00367337	0	2	92	2	A0A0P5N975; A0A0P5NSN3	0	1858.97	2.79	High	0	0.02508
	FALSE	High	KVANFGNGVGLK	1xDeamidated [N7]	0.0795898	0	1	2	1	A0A0P5NSN3	1	1204.67	2.18	High	0	0.07181
FALSE	High	Master Protein	A0A0P6HLJ2	Putative Pupal cuticle protein (Fragment) OS=Daphnia magna PE=4 SV=1	0	6.454	27.0718	4	4	4	1	181	20	8.84	10.82	4
	Checked	Confidence	Sequence	Modifications	Qvality PEP	Qvality q-value	# Protein Groups	# Proteins	# PSMs	Master Protein Accessions	# Missed Cleavages	Theo. MH+ [Da]	XCorr Sequest HT	Confidence Sequest HT	Percolator q-Value Sequest HT	Percolator PEP Sequest HT
	FALSE	High	NLDGSSQWSFAGSDGTTRDESQAQK		0.00300378	0	1	9	1	A0A0P6HLJ2	1	2672.18	3.64	High	0	0.002365
	FALSE	High	NLDGSSQWSFAGSDGTTR		0.0373708	0	1	9	1	A0A0P6HLJ2	0	1885.83	2.11	High	0	0.0326
	FALSE	High	ITLSWVADEK		0.144101	0	1	11	1	A0A0P6HLJ2	0	1161.62	1.94	High	0	0.1335
	FALSE	High	KEPEITITSQSDVR		0.039054	0	1	5	1	A0A0P6HLJ2	1	1602.83	3.13	High	0	0.03419
FALSE	High	Master Protein	A0A0P5XKN4	Uncharacterized protein OS=Daphnia magna PE=4 SV=1	0	6.013	15.5	2	2	1	1	200	22.1	5.16	5.89	2
	Checked	Confidence	Sequence	Modifications	Qvality PEP	Qvality q-value	# Protein Groups	# Proteins	# PSMs	Master Protein Accessions	# Missed Cleavages	Theo. MH+ [Da]	XCorr Sequest HT	Confidence Sequest HT	Percolator q-Value Sequest HT	Percolator PEP Sequest HT
	FALSE	High	NLDGSSQWSYAQSDYTTR		4.86157e-05	0	4	298	2	A0A164PJ92; E9GSV4; A0A0P5XKN4; A0A0P6E3C1	0	2078.91	3.54	High	0	3.226e-05
	FALSE	High	YVDITITSQSDER		0.0345672	0	1	11	1	A0A0P5XKN4	0	1526.73	2.36	High	0	0.03006
FALSE	High	Master Protein	E9GSV4	Uncharacterized protein OS=Daphnia pulex GN=DAPPUDRAFT_305774 PE=4 SV=1	0	5.984	17.0213	2	2	1	1	188	20.7	6.19	6.3	2
	Checked	Confidence	Sequence	Modifications	Qvality PEP	Qvality q-value	# Protein Groups	# Proteins	# PSMs	Master Protein Accessions	# Missed Cleavages	Theo. MH+ [Da]	XCorr Sequest HT	Confidence Sequest HT	Percolator q-Value Sequest HT	Percolator PEP Sequest HT
	FALSE	High	NLDGSSQWSYAQSDYTTR		4.86157e-05	0	4	298	2	A0A164PJ92; E9GSV4; A0A0P5XKN4; A0A0P6E3C1	0	2078.91	3.54	High	0	3.226e-05
	FALSE	High	KYADITITSQSDER		0.0368675	0	1	1	1	E9GSV4	1	1626.8	2.76	High	0	0.03218
FALSE	High	Master Protein	A0A0N8ENL7	Uncharacterized protein (Fragment) OS=Daphnia magna PE=4 SV=1	0	5.557	13.7931	2	3	2	1	232	24.9	9.16	9.33	2
	Checked	Confidence	Sequence	Modifications	Qvality PEP	Qvality q-value	# Protein Groups	# Proteins	# PSMs	Master Protein Accessions	# Missed Cleavages	Theo. MH+ [Da]	XCorr Sequest HT	Confidence Sequest HT	Percolator q-Value Sequest HT	Percolator PEP Sequest HT
	FALSE	High	GDHLPVAPALPYSR		0.046414	0	1	13	1	A0A0N8ENL7	0	1492.79	3.41	High	0	0.04086
	FALSE	High	NGDGSSQWSYAGSDGTTR	1xDeamidated [N1]	0.00588145	0	1	43	1	A0A0N8ENL7	0	1846.75	3.16	High	0	0.004759
	FALSE	High	NGDGSSQWSYAGSDGTTR		0.0168691	0	1	43	1	A0A0N8ENL7	0	1845.76	2.76	High	0	0.01425
FALSE	High	Master Protein	A0A0P4ZJY8	Uncharacterized protein OS=Daphnia magna PE=4 SV=1	0	5.365	6.87285	3	3	1	1	582	63.9	9.22	7.21	3
	Checked	Confidence	Sequence	Modifications	Qvality PEP	Qvality q-value	# Protein Groups	# Proteins	# PSMs	Master Protein Accessions	# Missed Cleavages	Theo. MH+ [Da]	XCorr Sequest HT	Confidence Sequest HT	Percolator q-Value Sequest HT	Percolator PEP Sequest HT
	FALSE	High	LAPADCLQYFTTR	1xCarbamidomethyl [C6]	0.0491604	0	1	29	1	A0A0P4ZJY8	0	1555.76	2.2	High	0	0.04348
	FALSE	High	QLANQDYSICFR	1xCarbamidomethyl [C10]	0.0845371	0	4	182	1	A0A0P5EPY5; A0A0P4ZJY8; A0A0P5N5W7; A0A162CE10	0	1514.71	2.01	High	0	0.07637
	FALSE	High	GNCLDSQTCSLAGGR	2xCarbamidomethyl [C3; C9]	0.0016936	0	2	50	1	A0A0P4ZJY8; A0A0P5N5W7	0	1595.69	2.99	High	0	0.0013
FALSE	High	Master Protein	A0A0P6GQ12	Chorion peroxidase OS=Daphnia magna PE=4 SV=1	0	5.265	5.69444	3	3	1	1	720	81.6	7.64	7.7	3
	Checked	Confidence	Sequence	Modifications	Qvality PEP	Qvality q-value	# Protein Groups	# Proteins	# PSMs	Master Protein Accessions	# Missed Cleavages	Theo. MH+ [Da]	XCorr Sequest HT	Confidence Sequest HT	Percolator q-Value Sequest HT	Percolator PEP Sequest HT
	FALSE	High	FGHSLIPNALER		0.0780042	0	2	44	1	A0A0P6GQ12; A0A0P6HQA8	0	1353.73	2.5	High	0	0.07029
	FALSE	High	DETSGFGSDLASLNIQR		0.000629843	0	2	38	1	A0A0P6GQ12; A0A0P6HQA8	0	1809.86	3.11	High	0	0.0004643
	FALSE	High	ISVTGEQLPTAR		0.177871	0	1	25	1	A0A0P6GQ12	0	1271.7	2.09	High	0	0.1663
FALSE	High	Master Protein	A0A0P5N5W7	Uncharacterized protein OS=Daphnia magna PE=4 SV=1	0	5.088	7.72201	3	3	1	1	518	56.1	7.36	7.12	3
	Checked	Confidence	Sequence	Modifications	Qvality PEP	Qvality q-value	# Protein Groups	# Proteins	# PSMs	Master Protein Accessions	# Missed Cleavages	Theo. MH+ [Da]	XCorr Sequest HT	Confidence Sequest HT	Percolator q-Value Sequest HT	Percolator PEP Sequest HT
	FALSE	High	QLANQDYSICFR	1xCarbamidomethyl [C10]	0.0845371	0	4	182	1	A0A0P5EPY5; A0A0P4ZJY8; A0A0P5N5W7; A0A162CE10	0	1514.71	2.01	High	0	0.07637
	FALSE	High	LAPSGCLQYFTAR	1xCarbamidomethyl [C6]	0.0906864	0	1	61	1	A0A0P5N5W7	0	1483.74	2.11	High	0	0.08222
	FALSE	High	GNCLDSQTCSLAGGR	2xCarbamidomethyl [C3; C9]	0.0016936	0	2	50	1	A0A0P4ZJY8; A0A0P5N5W7	0	1595.69	2.99	High	0	0.0013
FALSE	High	Master Protein	A0A0P6B4K4	Uncharacterized protein OS=Daphnia magna PE=4 SV=1	0	4.563	4.55259	1	1	1	1	637	67.9	7.36	3.86	1
	Checked	Confidence	Sequence	Modifications	Qvality PEP	Qvality q-value	# Protein Groups	# Proteins	# PSMs	Master Protein Accessions	# Missed Cleavages	Theo. MH+ [Da]	XCorr Sequest HT	Confidence Sequest HT	Percolator q-Value Sequest HT	Percolator PEP Sequest HT
	FALSE	High	YCGSQLNPAIGTAAAPGAATSIQVCSPIR	2xCarbamidomethyl [C2; C25]	4.15014e-05	0	1	18	1	A0A0P6B4K4	0	2931.45	3.86	High	0	2.73391e-05
FALSE	High	Master Protein	A0A0P4Z0Z8	Uncharacterized protein (Fragment) OS=Daphnia magna PE=4 SV=1	0	4.487	13.1757	3	3	2	1	296	32.1	6.15	9.76	3
	Checked	Confidence	Sequence	Modifications	Qvality PEP	Qvality q-value	# Protein Groups	# Proteins	# PSMs	Master Protein Accessions	# Missed Cleavages	Theo. MH+ [Da]	XCorr Sequest HT	Confidence Sequest HT	Percolator q-Value Sequest HT	Percolator PEP Sequest HT
	FALSE	High	APEITIVSQSDVR		0.0374977	0	2	63	1	A0A0N8BAU8; A0A0P4Z0Z8	0	1414.75	3.71	High	0	0.03271
	FALSE	High	NLDGSGAWSYGGSDGTTRDESYAQK		0.0135173	0	1	28	1	A0A0P4Z0Z8	1	2622.13	2.31	High	0	0.01132
	FALSE	High	KAPEITIVSQSDVR		0.096621	0	1	1	1	A0A0P4Z0Z8	1	1542.85	3.74	High	0	0.08795
FALSE	High	Master Protein	A0A162SIV5	Histone H4 OS=Daphnia magna GN=APZ42_011260 PE=3 SV=1	0	4.246	5.77428	2	3	2	1	381	42.4	8.47	8.73	2
	Checked	Confidence	Sequence	Modifications	Qvality PEP	Qvality q-value	# Protein Groups	# Proteins	# PSMs	Master Protein Accessions	# Missed Cleavages	Theo. MH+ [Da]	XCorr Sequest HT	Confidence Sequest HT	Percolator q-Value Sequest HT	Percolator PEP Sequest HT
	FALSE	High	ISGLIYEETR		0.0413689	0	1	31	1	A0A162SIV5	0	1180.62	2.96	High	0	0.03623
	FALSE	High	DNIQGITKPAIR		0.0432303	0	1	29	2	A0A162SIV5	0	1325.75	3.23	High	0	0.04131
FALSE	High	Master Protein	A0A0P5G9Q8	Uncharacterized protein (Fragment) OS=Daphnia magna PE=4 SV=1	0	4.03	11.5385	3	3	3	1	338	37.8	8.29	7.63	3
	Checked	Confidence	Sequence	Modifications	Qvality PEP	Qvality q-value	# Protein Groups	# Proteins	# PSMs	Master Protein Accessions	# Missed Cleavages	Theo. MH+ [Da]	XCorr Sequest HT	Confidence Sequest HT	Percolator q-Value Sequest HT	Percolator PEP Sequest HT
	FALSE	High	FYTQTGEIDGLGGTPR		0.0170424	0	1	26	1	A0A0P5G9Q8	0	1711.83	2.44	High	0	0.01438
	FALSE	High	QLAIIGITADSQR		0.0536747	0	1	32	2	A0A0P5G9Q8	0	1385.77	2.4	High	0	0.04757
	FALSE	High	IKEDGLGPCK	1xCarbamidomethyl [C9]	0.147432	0	1	32	1	A0A0P5G9Q8	1	1116.57	2.79	High	0	0.1365
FALSE	High	Master Protein	A0A0P5LEG9	Uncharacterized protein OS=Daphnia magna PE=4 SV=1	0	3.92	19.186	2	2	1	1	172	19.2	5.21	5.26	2
	Checked	Confidence	Sequence	Modifications	Qvality PEP	Qvality q-value	# Protein Groups	# Proteins	# PSMs	Master Protein Accessions	# Missed Cleavages	Theo. MH+ [Da]	XCorr Sequest HT	Confidence Sequest HT	Percolator q-Value Sequest HT	Percolator PEP Sequest HT
	FALSE	High	NLDGSSQWNYAQSDYATR		0.00938474	0	1	108	1	A0A0P5LEG9	0	2075.91	2.64	High	0	0.007736
	FALSE	High	FTLTWTADDAGFQPK		0.0183685	0	2	159	1	A0A0P5LEG9; A0A0P6E3C1	0	1697.82	2.62	High	0	0.01554
FALSE	High	Master Protein	A0A0P5VRA9	Uncharacterized protein (Fragment) OS=Daphnia magna PE=4 SV=1	0	3.795	12.7572	2	2	2	1	243	26	10.02	5.83	2
	Checked	Confidence	Sequence	Modifications	Qvality PEP	Qvality q-value	# Protein Groups	# Proteins	# PSMs	Master Protein Accessions	# Missed Cleavages	Theo. MH+ [Da]	XCorr Sequest HT	Confidence Sequest HT	Percolator q-Value Sequest HT	Percolator PEP Sequest HT
	FALSE	High	APEIAIVAQSDVR		0.0179357	0	1	26	1	A0A0P5VRA9	0	1368.75	3.56	High	0	0.01519
	FALSE	High	NVDGSGAWSYAGSDGTTR		0.0126694	0	1	30	1	A0A0P5VRA9	0	1800.78	2.27	High	0	0.01056
FALSE	High	Master Protein	A0A0P6ATI7	Uncharacterized protein OS=Daphnia magna PE=4 SV=1	0	3.008	4.8	1	1	1	1	375	40.2	4.75	3.6	1
	Checked	Confidence	Sequence	Modifications	Qvality PEP	Qvality q-value	# Protein Groups	# Proteins	# PSMs	Master Protein Accessions	# Missed Cleavages	Theo. MH+ [Da]	XCorr Sequest HT	Confidence Sequest HT	Percolator q-Value Sequest HT	Percolator PEP Sequest HT
	FALSE	High	NLDGSSQWSYAGSDGTTR		0.00129356	0	1	34	1	A0A0P6ATI7	0	1901.83	3.6	High	0	0.0009823
FALSE	High	Master Protein	A0A0P6D833	Uncharacterized protein OS=Daphnia magna PE=4 SV=1	0	2.783	8.42391	2	2	2	1	368	42.1	7.8	4.55	2
	Checked	Confidence	Sequence	Modifications	Qvality PEP	Qvality q-value	# Protein Groups	# Proteins	# PSMs	Master Protein Accessions	# Missed Cleavages	Theo. MH+ [Da]	XCorr Sequest HT	Confidence Sequest HT	Percolator q-Value Sequest HT	Percolator PEP Sequest HT
	FALSE	High	LEQETYLCPSETSYVQPLR	1xCarbamidomethyl [C8]	0.014178	0	1	89	1	A0A0P6D833	0	2313.11	2.61	High	0	0.01188
	FALSE	High	ACPLVPTCYESK	2xCarbamidomethyl [C2; C8]	0.149854	0	1	85	1	A0A0P6D833	0	1424.65	1.94	High	0	0.1388
FALSE	High	Master Protein	A0A0P6HCZ7	Chorion peroxidase OS=Daphnia magna PE=4 SV=1	0	2.693	2.65152	2	2	2	1	1056	119.8	7.25	2.15	2
	Checked	Confidence	Sequence	Modifications	Qvality PEP	Qvality q-value	# Protein Groups	# Proteins	# PSMs	Master Protein Accessions	# Missed Cleavages	Theo. MH+ [Da]	XCorr Sequest HT	Confidence Sequest HT	Percolator q-Value Sequest HT	Percolator PEP Sequest HT
	FALSE	High	IVDCDSLAIPR	1xCarbamidomethyl [C4]	0.0252061	0	1	27	1	A0A0P6HCZ7	0	1258.65	2.15	High	0	0.02167
	FALSE	High	DTILSDTCPSDPTCDQK	2xCarbamidomethyl [C8; C14]	0.102587	0	1	37	1	A0A0P6HCZ7	0	1952.82	1.42	High	0	0.09354
FALSE	High	Master Protein	A0A0P6GXM8	Cuticle protein (Fragment) OS=Daphnia magna PE=4 SV=1	0	2.508	5.35714	1	1	1	1	336	36.8	7.46	2.56	1
	Checked	Confidence	Sequence	Modifications	Qvality PEP	Qvality q-value	# Protein Groups	# Proteins	# PSMs	Master Protein Accessions	# Missed Cleavages	Theo. MH+ [Da]	XCorr Sequest HT	Confidence Sequest HT	Percolator q-Value Sequest HT	Percolator PEP Sequest HT
	FALSE	High	TQIVSYQADENGYNADVK		0.00390596	0	1	120	1	A0A0P6GXM8	0	2014.94	2.56	High	0	0.003107
FALSE	High	Master Protein	A0A0N8DL25	Spz1 (Fragment) OS=Daphnia magna PE=4 SV=1	0	2.49	5.85242	2	2	2	1	393	44.5	8.57	6.11	2
	Checked	Confidence	Sequence	Modifications	Qvality PEP	Qvality q-value	# Protein Groups	# Proteins	# PSMs	Master Protein Accessions	# Missed Cleavages	Theo. MH+ [Da]	XCorr Sequest HT	Confidence Sequest HT	Percolator q-Value Sequest HT	Percolator PEP Sequest HT
	FALSE	High	TETCLFPEAACR	2xCarbamidomethyl [C4; C11]	0.0610188	0	1	145	1	A0A0N8DL25	0	1454.64	3.37	High	0	0.05447
	FALSE	High	MLSFDPCDERR	1xOxidation [M1]; 1xCarbamidomethyl [C7]	0.0663817	0	1	93	1	A0A0N8DL25	1	1441.62	2.74	High	0	0.05936
FALSE	High	Master Protein	A0A0P6AQ80	Gly d 3 OS=Daphnia magna PE=3 SV=1	0	2.468	6.04651	2	2	2	1	430	45.5	9.17	4.2	2
	Checked	Confidence	Sequence	Modifications	Qvality PEP	Qvality q-value	# Protein Groups	# Proteins	# PSMs	Master Protein Accessions	# Missed Cleavages	Theo. MH+ [Da]	XCorr Sequest HT	Confidence Sequest HT	Percolator q-Value Sequest HT	Percolator PEP Sequest HT
	FALSE	High	FLNHPNYVPR		0.0626868	0	1	111	2	A0A0P6AQ80	0	1256.65	2.3	High	0	0.05601
	FALSE	High	VNTLTLSGSTTGSVTR		0.0679645	0	1	113	1	A0A0P6AQ80	0	1593.84	1.9	High	0	0.06081
FALSE	High	Master Protein	A0A083ZU72	ATP synthase subunit beta OS=Serratia sp. DD3 GN=atpD_4 PE=3 SV=1	0	2.307	5.43478	2	2	2	1	460	50.2	5.06	4.65	2
	Checked	Confidence	Sequence	Modifications	Qvality PEP	Qvality q-value	# Protein Groups	# Proteins	# PSMs	Master Protein Accessions	# Missed Cleavages	Theo. MH+ [Da]	XCorr Sequest HT	Confidence Sequest HT	Percolator q-Value Sequest HT	Percolator PEP Sequest HT
	FALSE	High	VGLFGGAGVGK		0.0688855	0	1	1	1	A0A083ZU72	0	961.547	2.78	High	0	0.06172
	FALSE	High	YTLAGTEVSALLGR		0.0882943	0	1	1	1	A0A083ZU72	0	1450.79	1.87	High	0	0.07989
FALSE	High	Master Protein	A0A0P5EA16	Actin, alpha skeletal muscle (Fragment) OS=Daphnia magna PE=3 SV=1	0	2.299	4.2623	2	2	2	1	610	66.3	5.06	1.97	2
	Checked	Confidence	Sequence	Modifications	Qvality PEP	Qvality q-value	# Protein Groups	# Proteins	# PSMs	Master Protein Accessions	# Missed Cleavages	Theo. MH+ [Da]	XCorr Sequest HT	Confidence Sequest HT	Percolator q-Value Sequest HT	Percolator PEP Sequest HT
	FALSE	High	SYELPDGQVITIGNER		0.0882943	0	1	250	1	A0A0P5EA16	0	1790.89	1.58	High	0	0.08008
	FALSE	High	AGFAGDDAPR		0.0700539	0	1	157	1	A0A0P5EA16	0	976.448	1.97	High	0	0.0627
FALSE	High	Master Protein	A0A0P6G7T8	Uncharacterized protein OS=Daphnia magna PE=4 SV=1	0	2.294	8.68056	2	2	1	1	288	30.9	5.36	2.65	2
	Checked	Confidence	Sequence	Modifications	Qvality PEP	Qvality q-value	# Protein Groups	# Proteins	# PSMs	Master Protein Accessions	# Missed Cleavages	Theo. MH+ [Da]	XCorr Sequest HT	Confidence Sequest HT	Percolator q-Value Sequest HT	Percolator PEP Sequest HT
	FALSE	High	GSSYWVSPEGQK		0.176733	0	4	250	1	A0A0P6G074; A0A0P6G7T8; A0A0P5RR94; A0A0P6E3C1	0	1324.62	1.59	High	0	0.1649
	FALSE	High	YGGITITSQSDER		0.0353976	0	1	44	1	A0A0P6G7T8	0	1426.68	2.65	High	0	0.03079
FALSE	High	Master Protein	A0A0P6B327	Uncharacterized protein OS=Daphnia magna PE=4 SV=1	0	2.266	13.8889	2	2	1	1	216	23	7.69	4.07	2
	Checked	Confidence	Sequence	Modifications	Qvality PEP	Qvality q-value	# Protein Groups	# Proteins	# PSMs	Master Protein Accessions	# Missed Cleavages	Theo. MH+ [Da]	XCorr Sequest HT	Confidence Sequest HT	Percolator q-Value Sequest HT	Percolator PEP Sequest HT
	FALSE	High	LVCTEMVAATAFTQTGK	1xOxidation [M6]; 1xCarbamidomethyl [C3]	0.0616391	0	2	11	1	A0A0P6B327; A0A0P6J9P5	0	1843.89	1.94	High	0	0.05503
	FALSE	High	ETIIILPADAECR	1xCarbamidomethyl [C12]	0.107828	0	1	25	1	A0A0P6B327	0	1500.77	2.13	High	0	0.09845
FALSE	High	Master Protein	A0A0N8EMM0	Uncharacterized protein (Fragment) OS=Daphnia magna PE=4 SV=1	0	2.22	6.83371	2	2	2	1	439	47.8	7.06	3.93	2
	Checked	Confidence	Sequence	Modifications	Qvality PEP	Qvality q-value	# Protein Groups	# Proteins	# PSMs	Master Protein Accessions	# Missed Cleavages	Theo. MH+ [Da]	XCorr Sequest HT	Confidence Sequest HT	Percolator q-Value Sequest HT	Percolator PEP Sequest HT
	FALSE	High	EISSIQNDLTVPTVQGEVVR	1xDeamidated [Q6]	0.0814794	0	1	75	1	A0A0N8EMM0	0	2185.13	1.93	High	0	0.07355
	FALSE	High	SNKEFSIIYK		0.090384	0	1	74	1	A0A0N8EMM0	1	1228.66	2	High	0	0.08201
FALSE	High	Master Protein	A0A0P6J9P5	Uncharacterized protein OS=Daphnia magna PE=4 SV=1	0	2.149	12.0482	2	2	1	1	249	27.2	8.76	4.49	2
	Checked	Confidence	Sequence	Modifications	Qvality PEP	Qvality q-value	# Protein Groups	# Proteins	# PSMs	Master Protein Accessions	# Missed Cleavages	Theo. MH+ [Da]	XCorr Sequest HT	Confidence Sequest HT	Percolator q-Value Sequest HT	Percolator PEP Sequest HT
	FALSE	High	LVCTEMVAATAFTQTGK	1xOxidation [M6]; 1xCarbamidomethyl [C3]	0.0616391	0	2	11	1	A0A0P6B327; A0A0P6J9P5	0	1843.89	1.94	High	0	0.05503
	FALSE	High	ATINILAGDLECR	1xCarbamidomethyl [C12]	0.139464	0	1	25	1	A0A0P6J9P5	0	1445.74	2.55	High	0	0.1288
FALSE	High	Master Protein	A0A164V7M5	Putative Ccp84Ae OS=Daphnia magna GN=APZ42_023119 PE=4 SV=1	0	2.098	5.09259	2	2	2	1	648	72.2	5.29	5.05	2
	Checked	Confidence	Sequence	Modifications	Qvality PEP	Qvality q-value	# Protein Groups	# Proteins	# PSMs	Master Protein Accessions	# Missed Cleavages	Theo. MH+ [Da]	XCorr Sequest HT	Confidence Sequest HT	Percolator q-Value Sequest HT	Percolator PEP Sequest HT
	FALSE	High	SDSYGVTGSYR		0.171141	0	1	102	1	A0A164V7M5	0	1191.53	1.94	High	0	0.1598
	FALSE	High	SDANVVTGSYR		0.0560831	0	1	68	1	A0A164V7M5	0	1168.56	3.11	High	0	0.04989
FALSE	High	Master Protein	A0A0P5RR94	Uncharacterized protein OS=Daphnia magna PE=4 SV=1	0	2.037	9.15751	2	2	1	1	273	30.4	7.68	2.19	2
	Checked	Confidence	Sequence	Modifications	Qvality PEP	Qvality q-value	# Protein Groups	# Proteins	# PSMs	Master Protein Accessions	# Missed Cleavages	Theo. MH+ [Da]	XCorr Sequest HT	Confidence Sequest HT	Percolator q-Value Sequest HT	Percolator PEP Sequest HT
	FALSE	High	YGEITVTSQSDER		0.0624759	0	1	8	1	A0A0P5RR94	0	1484.69	2.19	High	0	0.05569
	FALSE	High	GSSYWVSPEGQK		0.176733	0	4	250	1	A0A0P6G074; A0A0P6G7T8; A0A0P5RR94; A0A0P6E3C1	0	1324.62	1.59	High	0	0.1649
FALSE	High	Master Protein	A0A0P5FS02	Superoxide dismutase [Cu-Zn] OS=Daphnia magna PE=3 SV=1	0	2.001	5.8642	1	1	1	1	324	34.8	7.56	2.15	1
	Checked	Confidence	Sequence	Modifications	Qvality PEP	Qvality q-value	# Protein Groups	# Proteins	# PSMs	Master Protein Accessions	# Missed Cleavages	Theo. MH+ [Da]	XCorr Sequest HT	Confidence Sequest HT	Percolator q-Value Sequest HT	Percolator PEP Sequest HT
	FALSE	High	SPVSGVLDLTESAAAGGVR		0.0119968	0	1	16	1	A0A0P5FS02	0	1785.93	2.15	High	0	0.009978
FALSE	High	Master Protein	A0A0P6FYL5	Uncharacterized protein OS=Daphnia magna PE=4 SV=1	0	1.834	3.207	1	1	1	1	343	37.4	8.27	2.59	1
	Checked	Confidence	Sequence	Modifications	Qvality PEP	Qvality q-value	# Protein Groups	# Proteins	# PSMs	Master Protein Accessions	# Missed Cleavages	Theo. MH+ [Da]	XCorr Sequest HT	Confidence Sequest HT	Percolator q-Value Sequest HT	Percolator PEP Sequest HT
	FALSE	High	LNNQNYNICFR	1xCarbamidomethyl [C9]	0.0173351	0	1	2	1	A0A0P6FYL5	0	1455.68	2.59	High	0	0.01464
FALSE	High	Master Protein	A0A0P5F7D4	Uncharacterized protein OS=Daphnia magna PE=4 SV=1	0	1.769	13.0252	2	2	2	1	238	25.9	5.16	3.94	2
	Checked	Confidence	Sequence	Modifications	Qvality PEP	Qvality q-value	# Protein Groups	# Proteins	# PSMs	Master Protein Accessions	# Missed Cleavages	Theo. MH+ [Da]	XCorr Sequest HT	Confidence Sequest HT	Percolator q-Value Sequest HT	Percolator PEP Sequest HT
	FALSE	High	ITATTTTPLTESNFMNIAVR	1xOxidation [M15]	0.122278	0	1	33	1	A0A0P5F7D4	0	2197.12	2.31	High	0	0.1124
	FALSE	High	LTCSEVAASLR	1xCarbamidomethyl [C3]	0.163053	0	1	6	1	A0A0P5F7D4	0	1206.61	1.64	High	0	0.1516
FALSE	High	Master Protein	A0A164TV16	Cuticular protein OS=Daphnia magna GN=APZ42_024693 PE=4 SV=1	0	1.674	8.63309	1	1	1	1	139	16.1	8.53	2.85	1
	Checked	Confidence	Sequence	Modifications	Qvality PEP	Qvality q-value	# Protein Groups	# Proteins	# PSMs	Master Protein Accessions	# Missed Cleavages	Theo. MH+ [Da]	XCorr Sequest HT	Confidence Sequest HT	Percolator q-Value Sequest HT	Percolator PEP Sequest HT
	FALSE	High	ANDYTGYVADVK	1xDeamidated [N2]	0.0246971	0	1	1	1	A0A164TV16	0	1316.6	2.85	High	0	0.02118
FALSE	High	Master Protein	A0A0P5TMA6	Mucin-17 OS=Daphnia magna PE=4 SV=1	0	1.601	0.586907	1	1	1	1	2215	236.8	6.74	2.39	1
	Checked	Confidence	Sequence	Modifications	Qvality PEP	Qvality q-value	# Protein Groups	# Proteins	# PSMs	Master Protein Accessions	# Missed Cleavages	Theo. MH+ [Da]	XCorr Sequest HT	Confidence Sequest HT	Percolator q-Value Sequest HT	Percolator PEP Sequest HT
	FALSE	High	KAESITGVDSQTR		0.0289742	0	1	70	1	A0A0P5TMA6	1	1391.71	2.39	High	0	0.02504
FALSE	High	Master Protein	A0A0P6G074	Uncharacterized protein (Fragment) OS=Daphnia magna PE=4 SV=1	0	1.566	17.0213	2	2	1	1	141	15.7	5.11	0	2
	Checked	Confidence	Sequence	Modifications	Qvality PEP	Qvality q-value	# Protein Groups	# Proteins	# PSMs	Master Protein Accessions	# Missed Cleavages	Theo. MH+ [Da]	XCorr Sequest HT	Confidence Sequest HT	Percolator q-Value Sequest HT	Percolator PEP Sequest HT
	FALSE	High	GSSYWVSPEANK		0.176733	0	1	1	1	A0A0P6G074	0	1324.62	1.59	High	0	0.1649
	FALSE	High	GSSYWVSPEGQK		0.176733	0	4	250	1	A0A0P6G074; A0A0P6G7T8; A0A0P5RR94; A0A0P6E3C1	0	1324.62	1.59	High	0	0.1649
FALSE	High	Master Protein	A0A0P6IVV4	Cuticle protein OS=Daphnia magna PE=4 SV=1	0	1.453	5.18868	1	1	1	1	212	24.2	9.25	2.15	1
	Checked	Confidence	Sequence	Modifications	Qvality PEP	Qvality q-value	# Protein Groups	# Proteins	# PSMs	Master Protein Accessions	# Missed Cleavages	Theo. MH+ [Da]	XCorr Sequest HT	Confidence Sequest HT	Percolator q-Value Sequest HT	Percolator PEP Sequest HT
	FALSE	High	ADQNGYVADVK	2xDeamidated [Q3; N4]	0.0402631	0	1	30	1	A0A0P6IVV4	0	1181.53	2.15	High	0	0.0352
FALSE	High	Master Protein	A0A0P6H2P2	Putative Cuticle protein (Fragment) OS=Daphnia magna PE=4 SV=1	0	1.418	3.65535	1	1	1	1	383	41.9	5.59	1.8	1
	Checked	Confidence	Sequence	Modifications	Qvality PEP	Qvality q-value	# Protein Groups	# Proteins	# PSMs	Master Protein Accessions	# Missed Cleavages	Theo. MH+ [Da]	XCorr Sequest HT	Confidence Sequest HT	Percolator q-Value Sequest HT	Percolator PEP Sequest HT
	FALSE	High	LVSGTYYVVLPDGR		0.043524	0	1	148	1	A0A0P6H2P2	0	1538.82	1.8	High	0	0.03823
FALSE	High	Master Protein	A0A0P6HIW0	Uncharacterized protein (Fragment) OS=Daphnia magna PE=4 SV=1	0	1.394	8.29268	1	1	1	1	205	23.8	9.35	2.1	1
	Checked	Confidence	Sequence	Modifications	Qvality PEP	Qvality q-value	# Protein Groups	# Proteins	# PSMs	Master Protein Accessions	# Missed Cleavages	Theo. MH+ [Da]	XCorr Sequest HT	Confidence Sequest HT	Percolator q-Value Sequest HT	Percolator PEP Sequest HT
	FALSE	High	ESSGIETSYAYDVEGQK		0.0457902	0	1	14	1	A0A0P6HIW0	0	1862.83	2.1	High	0	0.04035
FALSE	High	Master Protein	A0A0P6HXF6	Cuticle protein OS=Daphnia magna PE=4 SV=1	0	1.339	6.54206	1	1	1	1	214	24	6.54	2.88	1
	Checked	Confidence	Sequence	Modifications	Qvality PEP	Qvality q-value	# Protein Groups	# Proteins	# PSMs	Master Protein Accessions	# Missed Cleavages	Theo. MH+ [Da]	XCorr Sequest HT	Confidence Sequest HT	Percolator q-Value Sequest HT	Percolator PEP Sequest HT
	FALSE	High	VVTGSYSVALPDGR		0.0517168	0	1	48	1	A0A0P6HXF6	0	1420.74	2.88	High	0	0.04583
FALSE	High	Master Protein	A0A0P5PRG5	Uncharacterized protein (Fragment) OS=Daphnia magna PE=4 SV=1	0	1.269	9.92908	1	1	1	1	141	15.8	5.12	2.37	1
	Checked	Confidence	Sequence	Modifications	Qvality PEP	Qvality q-value	# Protein Groups	# Proteins	# PSMs	Master Protein Accessions	# Missed Cleavages	Theo. MH+ [Da]	XCorr Sequest HT	Confidence Sequest HT	Percolator q-Value Sequest HT	Percolator PEP Sequest HT
	FALSE	High	KYPEITVTGQSDER		0.0604046	0	1	2	1	A0A0P5PRG5	1	1622.8	2.37	High	0	0.05384
FALSE	High	Master Protein	A0A0P6BNY4	Elongation factor Tu (Fragment) OS=Daphnia magna PE=3 SV=1	0	1.25	3.11688	1	1	1	1	385	41.6	5.31	2.56	1
	Checked	Confidence	Sequence	Modifications	Qvality PEP	Qvality q-value	# Protein Groups	# Proteins	# PSMs	Master Protein Accessions	# Missed Cleavages	Theo. MH+ [Da]	XCorr Sequest HT	Confidence Sequest HT	Percolator q-Value Sequest HT	Percolator PEP Sequest HT
	FALSE	High	GEAGDNVGLLLR		0.0628985	0	1	3	1	A0A0P6BNY4	0	1213.65	2.56	High	0	0.05618
FALSE	High	Master Protein	A0A0P4ZEM4	Uncharacterized protein OS=Daphnia magna PE=4 SV=1	0	1.242	1.88324	1	2	1	1	531	56.4	5.83	2.11	1
	Checked	Confidence	Sequence	Modifications	Qvality PEP	Qvality q-value	# Protein Groups	# Proteins	# PSMs	Master Protein Accessions	# Missed Cleavages	Theo. MH+ [Da]	XCorr Sequest HT	Confidence Sequest HT	Percolator q-Value Sequest HT	Percolator PEP Sequest HT
	FALSE	High	TGFCLDFQQR	1xCarbamidomethyl [C4]; 1xDeamidated [Q]	0.0641831	0	1	1	2	A0A0P4ZEM4	0	1272.57	2.11	High	0	0.0573
FALSE	High	Master Protein	A0A0P5SLU7	Obstructor-A (Fragment) OS=Daphnia magna PE=4 SV=1	0	1.23	2.29645	1	1	1	1	479	52.7	4.89	2.1	1
	Checked	Confidence	Sequence	Modifications	Qvality PEP	Qvality q-value	# Protein Groups	# Proteins	# PSMs	Master Protein Accessions	# Missed Cleavages	Theo. MH+ [Da]	XCorr Sequest HT	Confidence Sequest HT	Percolator q-Value Sequest HT	Percolator PEP Sequest HT
	FALSE	High	FYVCLNGVTPR	1xCarbamidomethyl [C4]; 1xDeamidated [N6]	0.0659361	0	1	112	1	A0A0P5SLU7	0	1326.65	2.1	High	0	0.05891
FALSE	High	Master Protein	A0A0P6I7Y1	Cuticular protein analogous to peritrophins 3-D1 (Fragment) OS=Daphnia magna PE=4 SV=1	0	1.206	2.61097	1	1	1	1	383	42	5.31	2.54	1
	Checked	Confidence	Sequence	Modifications	Qvality PEP	Qvality q-value	# Protein Groups	# Proteins	# PSMs	Master Protein Accessions	# Missed Cleavages	Theo. MH+ [Da]	XCorr Sequest HT	Confidence Sequest HT	Percolator q-Value Sequest HT	Percolator PEP Sequest HT
	FALSE	High	LVTCVNDYPR	1xCarbamidomethyl [C4]	0.0693505	0	1	18	1	A0A0P6I7Y1	0	1236.6	2.54	High	0	0.06217
FALSE	High	Master Protein	A0A0P6AQM0	C-type lectin ctl-galactose binding (Fragment) OS=Daphnia magna PE=4 SV=1	0	1.171	3.52113	1	1	1	1	426	47.3	9.44	2.45	1
	Checked	Confidence	Sequence	Modifications	Qvality PEP	Qvality q-value	# Protein Groups	# Proteins	# PSMs	Master Protein Accessions	# Missed Cleavages	Theo. MH+ [Da]	XCorr Sequest HT	Confidence Sequest HT	Percolator q-Value Sequest HT	Percolator PEP Sequest HT
	FALSE	High	LLSLPEADACAQRPK	1xCarbamidomethyl [C10]	0.0751767	0	1	41	1	A0A0P6AQM0	0	1668.87	2.45	High	0	0.06752
FALSE	High	Master Protein	A0A0P6IAI1	Uncharacterized protein OS=Daphnia magna PE=4 SV=1	0	1.145	4.96454	1	1	1	1	282	30.5	5.39	2.18	1
	Checked	Confidence	Sequence	Modifications	Qvality PEP	Qvality q-value	# Protein Groups	# Proteins	# PSMs	Master Protein Accessions	# Missed Cleavages	Theo. MH+ [Da]	XCorr Sequest HT	Confidence Sequest HT	Percolator q-Value Sequest HT	Percolator PEP Sequest HT
	FALSE	High	QVGPKPEDIGTVSK		0.0793234	0	1	250	1	A0A0P6IAI1	0	1454.78	2.18	High	0	0.0716
FALSE	High	Master Protein	A0A0P6I1W5	Uncharacterized protein OS=Daphnia magna PE=4 SV=1	0	1.136	2.44499	1	1	1	1	409	41.9	9.61	2.34	1
	Checked	Confidence	Sequence	Modifications	Qvality PEP	Qvality q-value	# Protein Groups	# Proteins	# PSMs	Master Protein Accessions	# Missed Cleavages	Theo. MH+ [Da]	XCorr Sequest HT	Confidence Sequest HT	Percolator q-Value Sequest HT	Percolator PEP Sequest HT
	FALSE	High	EYGGQIAPIR		0.0809351	0	1	66	1	A0A0P6I1W5	0	1103.58	2.34	High	0	0.07312
FALSE	High	Master Protein	A0A0P6I0W9	Chorion peroxidase (Fragment) OS=Daphnia magna PE=4 SV=1	0	1.126	1.39535	1	1	1	1	860	96.7	7.52	1.97	1
	Checked	Confidence	Sequence	Modifications	Qvality PEP	Qvality q-value	# Protein Groups	# Proteins	# PSMs	Master Protein Accessions	# Missed Cleavages	Theo. MH+ [Da]	XCorr Sequest HT	Confidence Sequest HT	Percolator q-Value Sequest HT	Percolator PEP Sequest HT
	FALSE	High	LAVGDVELPSAR		0.0828557	0	1	74	1	A0A0P6I0W9	0	1226.67	1.97	High	0	0.07476
FALSE	High	Master Protein	A0A0P5FE56	Uncharacterized protein OS=Daphnia magna PE=4 SV=1	0	1.101	2.6393	1	1	1	1	341	37.4	8.05	2.13	1
	Checked	Confidence	Sequence	Modifications	Qvality PEP	Qvality q-value	# Protein Groups	# Proteins	# PSMs	Master Protein Accessions	# Missed Cleavages	Theo. MH+ [Da]	XCorr Sequest HT	Confidence Sequest HT	Percolator q-Value Sequest HT	Percolator PEP Sequest HT
	FALSE	High	IGAVSDTPR		0.0874132	0	1	8	1	A0A0P5FE56	0	915.489	2.13	High	0	0.07918
FALSE	High	Master Protein	A0A0P5F3J3	Uncharacterized protein OS=Daphnia magna PE=4 SV=1	0	1.044	9.87654	1	1	1	1	162	17.5	5.11	1.85	1
	Checked	Confidence	Sequence	Modifications	Qvality PEP	Qvality q-value	# Protein Groups	# Proteins	# PSMs	Master Protein Accessions	# Missed Cleavages	Theo. MH+ [Da]	XCorr Sequest HT	Confidence Sequest HT	Percolator q-Value Sequest HT	Percolator PEP Sequest HT
	FALSE	High	IGEETGSTSNGSISWK	1xDeamidated [N10]	0.0992303	0	1	7	1	A0A0P5F3J3	0	1653.76	1.85	High	0	0.09036
FALSE	High	Master Protein	A0A0P6AHZ7	Uncharacterized protein OS=Daphnia magna PE=4 SV=1	0	1.038	3.76176	1	1	1	1	319	36.5	7.24	1.83	1
	Checked	Confidence	Sequence	Modifications	Qvality PEP	Qvality q-value	# Protein Groups	# Proteins	# PSMs	Master Protein Accessions	# Missed Cleavages	Theo. MH+ [Da]	XCorr Sequest HT	Confidence Sequest HT	Percolator q-Value Sequest HT	Percolator PEP Sequest HT
	FALSE	High	VETCLFAGASCR	2xCarbamidomethyl [C4; C11]	0.10056	0	1	19	1	A0A0P6AHZ7	0	1370.62	1.83	High	0	0.09169
FALSE	High	Master Protein	A0A0P6BCD8	Cuticle protein (Fragment) OS=Daphnia magna PE=4 SV=1	0	1.008	2.99728	1	1	1	1	367	39.6	9.01	2.59	1
	Checked	Confidence	Sequence	Modifications	Qvality PEP	Qvality q-value	# Protein Groups	# Proteins	# PSMs	Master Protein Accessions	# Missed Cleavages	Theo. MH+ [Da]	XCorr Sequest HT	Confidence Sequest HT	Percolator q-Value Sequest HT	Percolator PEP Sequest HT
	FALSE	High	SEANVVTGSYR		0.107471	0	1	23	1	A0A0P6BCD8	0	1182.57	2.59	High	0	0.0982
FALSE	High	Master Protein	A0A0P5MCE4	Uncharacterized protein OS=Daphnia magna GN=APZ42_033834 PE=4 SV=1	0	0.996	12.0968	1	1	1	1	124	13.5	4.92	2.22	1
	Checked	Confidence	Sequence	Modifications	Qvality PEP	Qvality q-value	# Protein Groups	# Proteins	# PSMs	Master Protein Accessions	# Missed Cleavages	Theo. MH+ [Da]	XCorr Sequest HT	Confidence Sequest HT	Percolator q-Value Sequest HT	Percolator PEP Sequest HT
	FALSE	High	VSDCGPPAKPNEECK	2xCarbamidomethyl [C4; C14]	0.110361	0	1	2	1	A0A0P5MCE4	0	1687.74	2.22	High	0	0.101
FALSE	High	Master Protein	E9FRE6	Uncharacterized protein OS=Daphnia pulex GN=DAPPUDRAFT_299957 PE=4 SV=1	0	0.989	5.24345	1	1	1	1	267	30.5	9.64	0	1
	Checked	Confidence	Sequence	Modifications	Qvality PEP	Qvality q-value	# Protein Groups	# Proteins	# PSMs	Master Protein Accessions	# Missed Cleavages	Theo. MH+ [Da]	XCorr Sequest HT	Confidence Sequest HT	Percolator q-Value Sequest HT	Percolator PEP Sequest HT
	FALSE	High	KGANGTVPLDKVGK	1xPhospho [T6]	0.111834	0	1	1	1	E9FRE6	2	1463.76	1.03	High	0	0.1025
FALSE	High	Master Protein	E9H5N1	Uncharacterized protein OS=Daphnia pulex GN=DAPPUDRAFT_325653 PE=4 SV=1	0	0.969	2.49042	1	1	1	1	522	55.2	5.2	0	1
	Checked	Confidence	Sequence	Modifications	Qvality PEP	Qvality q-value	# Protein Groups	# Proteins	# PSMs	Master Protein Accessions	# Missed Cleavages	Theo. MH+ [Da]	XCorr Sequest HT	Confidence Sequest HT	Percolator q-Value Sequest HT	Percolator PEP Sequest HT
	FALSE	High	LVEQLARPICQIR	1xCarbamidomethyl [C10]	0.117138	0	1	1	1	E9H5N1	0	1595.91	1.45	High	0	0.1075
FALSE	High	Master Protein	A0A0P6B2C3	Uncharacterized protein OS=Daphnia magna PE=4 SV=1	0	0.957	7.00389	1	1	1	1	257	28.3	8.63	1.65	1
	Checked	Confidence	Sequence	Modifications	Qvality PEP	Qvality q-value	# Protein Groups	# Proteins	# PSMs	Master Protein Accessions	# Missed Cleavages	Theo. MH+ [Da]	XCorr Sequest HT	Confidence Sequest HT	Percolator q-Value Sequest HT	Percolator PEP Sequest HT
	FALSE	High	GSQATLEFDYIPTQDTNR		0.120276	0	1	15	2	A0A0P6B2C3	0	2055.96	1.65	High	0	0.1105
FALSE	High	Master Protein	A0A0P5WRD1	Cuticular protein analogous to peritrophins 3-C5 (Fragment) OS=Daphnia magna PE=4 SV=1	0	0.93	3.75	1	1	1	1	480	52.4	5.4	2.18	1
	Checked	Confidence	Sequence	Modifications	Qvality PEP	Qvality q-value	# Protein Groups	# Proteins	# PSMs	Master Protein Accessions	# Missed Cleavages	Theo. MH+ [Da]	XCorr Sequest HT	Confidence Sequest HT	Percolator q-Value Sequest HT	Percolator PEP Sequest HT
	FALSE	High	NTEVQAGVAPAPEAAPVR		0.127631	0	1	16	1	A0A0P5WRD1	0	1776.92	2.18	High	0	0.1174
FALSE	High	Master Protein	A0A0P4ZFR8	Uncharacterized protein OS=Daphnia magna PE=4 SV=1	0	0.921	2.96296	1	1	1	1	270	28.2	5.55	2.44	1
	Checked	Confidence	Sequence	Modifications	Qvality PEP	Qvality q-value	# Protein Groups	# Proteins	# PSMs	Master Protein Accessions	# Missed Cleavages	Theo. MH+ [Da]	XCorr Sequest HT	Confidence Sequest HT	Percolator q-Value Sequest HT	Percolator PEP Sequest HT
	FALSE	High	QNYNICFR	1xCarbamidomethyl [C6]	0.130176	0	1	1	1	A0A0P4ZFR8	0	1114.51	2.44	High	0	0.1199
FALSE	High	Master Protein	A0A0N8DT07	Tubulin beta chain (Fragment) OS=Daphnia magna PE=3 SV=1	0	0.912	2.82353	1	1	1	1	425	47.6	5.39	1.82	1
	Checked	Confidence	Sequence	Modifications	Qvality PEP	Qvality q-value	# Protein Groups	# Proteins	# PSMs	Master Protein Accessions	# Missed Cleavages	Theo. MH+ [Da]	XCorr Sequest HT	Confidence Sequest HT	Percolator q-Value Sequest HT	Percolator PEP Sequest HT
	FALSE	High	INVYYNEATGGK		0.132769	0	1	1	1	A0A0N8DT07	0	1328.65	1.82	High	0	0.1225
FALSE	High	Master Protein	A0A0P6C2A3	Uncharacterized protein OS=Daphnia magna PE=4 SV=1	0	0.902	2.27848	1	1	1	1	395	43.9	9.03	2.42	1
	Checked	Confidence	Sequence	Modifications	Qvality PEP	Qvality q-value	# Protein Groups	# Proteins	# PSMs	Master Protein Accessions	# Missed Cleavages	Theo. MH+ [Da]	XCorr Sequest HT	Confidence Sequest HT	Percolator q-Value Sequest HT	Percolator PEP Sequest HT
	FALSE	High	ITAVSDTPR		0.135855	0	1	34	1	A0A0P6C2A3	0	959.516	2.42	High	0	0.1253
FALSE	High	Master Protein	A0A0P5PIW0	ATP synthase subunit beta OS=Daphnia magna PE=4 SV=1	0	0.896	1.44547	1	1	1	1	761	84.5	9.04	1.9	1
	Checked	Confidence	Sequence	Modifications	Qvality PEP	Qvality q-value	# Protein Groups	# Proteins	# PSMs	Master Protein Accessions	# Missed Cleavages	Theo. MH+ [Da]	XCorr Sequest HT	Confidence Sequest HT	Percolator q-Value Sequest HT	Percolator PEP Sequest HT
	FALSE	High	IGLFGGAGVGK		0.137648	0	1	166	2	A0A0P5PIW0	0	975.562	1.9	High	0	0.1272
FALSE	High	Master Protein	A0A0P4WQ96	Cuticular protein analogous to peritrophins 3-B (Fragment) OS=Daphnia magna PE=4 SV=1	0	0.893	2.36407	1	1	1	1	423	45.8	4.58	1.99	1
	Checked	Confidence	Sequence	Modifications	Qvality PEP	Qvality q-value	# Protein Groups	# Proteins	# PSMs	Master Protein Accessions	# Missed Cleavages	Theo. MH+ [Da]	XCorr Sequest HT	Confidence Sequest HT	Percolator q-Value Sequest HT	Percolator PEP Sequest HT
	FALSE	High	DVVAFDCPAR	1xCarbamidomethyl [C7]	0.138553	0	1	40	1	A0A0P4WQ96	0	1149.54	1.99	High	0	0.1279
FALSE	High	Master Protein	A0A0P5SN23	Serine protease inhibitor OS=Daphnia magna PE=4 SV=1	0	0.849	6.74847	1	1	1	1	163	18.6	6.87	1.97	1
	Checked	Confidence	Sequence	Modifications	Qvality PEP	Qvality q-value	# Protein Groups	# Proteins	# PSMs	Master Protein Accessions	# Missed Cleavages	Theo. MH+ [Da]	XCorr Sequest HT	Confidence Sequest HT	Percolator q-Value Sequest HT	Percolator PEP Sequest HT
	FALSE	High	NLFNSENACER	1xCarbamidomethyl [C9]	0.15281	0	1	12	1	A0A0P5SN23	0	1353.59	1.97	High	0	0.1416
FALSE	High	Master Protein	A0A0P6HRB4	Double oxidase: two peroxidase domains OS=Daphnia magna PE=4 SV=1	0	0.839	0.556483	1	1	1	1	1797	201.3	7.71	1.8	1
	Checked	Confidence	Sequence	Modifications	Qvality PEP	Qvality q-value	# Protein Groups	# Proteins	# PSMs	Master Protein Accessions	# Missed Cleavages	Theo. MH+ [Da]	XCorr Sequest HT	Confidence Sequest HT	Percolator q-Value Sequest HT	Percolator PEP Sequest HT
	FALSE	High	FTEAQLAEIR		0.155819	0	1	76	1	A0A0P6HRB4	0	1177.62	1.8	High	0	0.1449
FALSE	High	Master Protein	A0A0P6H825	Endocuticle structural glycoprotein SgAbd-2 OS=Daphnia magna PE=4 SV=1	0	0.839	6.04651	1	1	1	1	215	22.9	7.96	2.03	1
	Checked	Confidence	Sequence	Modifications	Qvality PEP	Qvality q-value	# Protein Groups	# Proteins	# PSMs	Master Protein Accessions	# Missed Cleavages	Theo. MH+ [Da]	XCorr Sequest HT	Confidence Sequest HT	Percolator q-Value Sequest HT	Percolator PEP Sequest HT
	FALSE	High	VGPKPEDIGTVSK		0.155819	0	1	32	1	A0A0P6H825	0	1326.73	2.03	High	0	0.1449
FALSE	High	Master Protein	A0A0P6B1Z7	Elongation factor 1-alpha OS=Daphnia magna PE=4 SV=1	0	0.831	1.71073	1	1	1	1	643	71.3	8.41	2.03	1
	Checked	Confidence	Sequence	Modifications	Qvality PEP	Qvality q-value	# Protein Groups	# Proteins	# PSMs	Master Protein Accessions	# Missed Cleavages	Theo. MH+ [Da]	XCorr Sequest HT	Confidence Sequest HT	Percolator q-Value Sequest HT	Percolator PEP Sequest HT
	FALSE	High	IGGIGTVPVGR		0.158883	0	1	149	1	A0A0P6B1Z7	0	1025.61	2.03	High	0	0.1476
FALSE	High	Master Protein	A0A0P6A8I9	Uncharacterized protein OS=Daphnia magna PE=4 SV=1	0	0.825	11.976	1	1	1	1	167	16.8	6.3	1.94	1
	Checked	Confidence	Sequence	Modifications	Qvality PEP	Qvality q-value	# Protein Groups	# Proteins	# PSMs	Master Protein Accessions	# Missed Cleavages	Theo. MH+ [Da]	XCorr Sequest HT	Confidence Sequest HT	Percolator q-Value Sequest HT	Percolator PEP Sequest HT
	FALSE	High	GVCSAGTSTTPFADTAECTK	2xCarbamidomethyl [C3; C18]	0.160955	0	1	1	1	A0A0P6A8I9	0	2060.89	1.94	High	0	0.1497
FALSE	High	Master Protein	A0A0P4ZRT6	Chemosensory protein 13 OS=Daphnia magna PE=4 SV=1	0	0.821	7.69231	1	1	1	1	156	17.5	8.35	1.6	1
	Checked	Confidence	Sequence	Modifications	Qvality PEP	Qvality q-value	# Protein Groups	# Proteins	# PSMs	Master Protein Accessions	# Missed Cleavages	Theo. MH+ [Da]	XCorr Sequest HT	Confidence Sequest HT	Percolator q-Value Sequest HT	Percolator PEP Sequest HT
	FALSE	High	VLNEGCSGCTPK	2xCarbamidomethyl [C6; C9]	0.162001	0	1	13	1	A0A0P4ZRT6	0	1321.59	1.6	High	0	0.1509
FALSE	High	Master Protein	A0A0P6H5P6	Cuticle protein OS=Daphnia magna PE=4 SV=1	0	0.795	1.77778	1	1	1	1	675	76.7	7.06	1.76	1
	Checked	Confidence	Sequence	Modifications	Qvality PEP	Qvality q-value	# Protein Groups	# Proteins	# PSMs	Master Protein Accessions	# Missed Cleavages	Theo. MH+ [Da]	XCorr Sequest HT	Confidence Sequest HT	Percolator q-Value Sequest HT	Percolator PEP Sequest HT
	FALSE	High	VQPAADEAPIIR		0.171693	0	1	53	1	A0A0P6H5P6	0	1279.7	1.76	High	0	0.1602
FALSE	High	Master Protein	A0A0N8DM27	Uncharacterized protein OS=Daphnia magna PE=4 SV=1	0	0.768	5.85938	1	1	1	1	256	28	7.77	2.02	1
	Checked	Confidence	Sequence	Modifications	Qvality PEP	Qvality q-value	# Protein Groups	# Proteins	# PSMs	Master Protein Accessions	# Missed Cleavages	Theo. MH+ [Da]	XCorr Sequest HT	Confidence Sequest HT	Percolator q-Value Sequest HT	Percolator PEP Sequest HT
	FALSE	High	VSDCGPPAKPNAECK	2xCarbamidomethyl [C4; C14]	0.182488	0.00670593	1	2	1	A0A0N8DM27	0	1629.74	2.02	High	0.005742	0.1706

## Sheet: Workbook 4
Checked	Protein FDR Confidence	Master	Accession	Description	Exp. q-value	Sum PEP Score	Coverage	# Peptides	# PSMs	# Unique Peptides	# Protein Groups	# AAs	MW [kDa]	calc. pI	Score Sequest HT	# Peptides Sequest HT
FALSE	High	Master Protein	A0A0P5ECS0	Copper-zinc cu-zn superoxide dismutase OS=Daphnia magna PE=4 SV=1	0	717.623	51.6525	118	231	0	1	2118	237.5	6.74	718.38	118
	Checked	Confidence	Sequence	Modifications	Qvality PEP	Qvality q-value	# Protein Groups	# Proteins	# PSMs	Master Protein Accessions	# Missed Cleavages	Theo. MH+ [Da]	XCorr Sequest HT	Confidence Sequest HT	Percolator q-Value Sequest HT	Percolator PEP Sequest HT
	FALSE	High	LMVETPFSR		0.0294129	0	10	125	1	A0A0P5Z193; A0A0P5XPE2; A0A0P5BM18; A0A0P4YK27; A0A0P5GUJ5; A0A0P6FTA8; A0A0P5ECS0; A0A0P5UT23; A0A0P5NEQ8; A0A0N8DYK4	0	1079.56	2.44	High	0	0.01941
	FALSE	High	HLGMDFVFVER	1xOxidation [M4]	0.000872352	0	12	112	2	A0A0P5I0U9; A0A0P5BM18; A0A0P4YK27; A0A0P5GUJ5; A0A0P5PPT4; A0A0P5PJQ0; A0A0P5XGU4; A0A0P5ECS0; A0A0N8AKQ7; A0A0P5UT23; A0A0P5NEQ8; A0A0N8DYK4	0	1365.66	3.36	High	0	0.01263
	FALSE	High	HLGMDFVFVER		0.000610115	0	12	112	1	A0A0P5I0U9; A0A0P5BM18; A0A0P4YK27; A0A0P5GUJ5; A0A0P5PPT4; A0A0P5PJQ0; A0A0P5XGU4; A0A0P5ECS0; A0A0N8AKQ7; A0A0P5UT23; A0A0P5NEQ8; A0A0N8DYK4	0	1349.67	2.91	High	0	0.0002464
	FALSE	High	KIEQGILNGEQSWENVR	1xDeamidated [N8]	1.14401e-05	0	5	65	2	A0A0P5Z193; A0A0P4YK27; A0A0P5ECS0; A0A0N8AKQ7; A0A0P5J4J3	1	2001	5.69	High	0	2.818e-06
	FALSE	High	VETVAIGKEEPLWIVNFK		1.6249e-06	0	7	120	2	A0A0P5Z193; A0A0P5BM18; A0A0P4YK27; A0A0P5LYR5; A0A0P5ECS0; A0A0N8AKQ7; A0A0P5NG35	1	2072.14	6.5	High	0	3.134e-07
	FALSE	High	DESSIISPELEK		0.00455817	0	18	150	1	A0A0P5Z193; E9HZI6; A0A0P5XPE2; A0A0P5BM18; A0A0P5S327; A0A0P4YK27; A0A0P5IAS3; A0A0P5GUJ5; A0A0P5I5B7; A0A0P5PJQ0; A0A0P5XGU4; A0A0P6FTA8; A0A0P5ECS0; A0A0P5UT23; E9GVW7; A0A0P6EEN9; A0A0P5NEQ8; A0A0N8DYK4	0	1346.67	3.2	High	0	0.002369
	FALSE	High	TADNFIEVDSPISHMIR	1xOxidation [M15]	4.24698e-06	0	7	118	3	A0A0P5BM18; A0A0P5M269; A0A0P5XGU4; A0A0P5ECS0; A0A0N8AKQ7; A0A0P5UT23; A0A0P5YRE9	0	1960.94	4.91	High	0	9.198e-07
	FALSE	High	VFKPYSNVFFR		0.0644609	0	7	111	1	A0A0P5BM18; A0A0P5PPT4; A0A0P5XGU4; A0A0P5ECS0; A0A0N8AKQ7; A0A0P5YRE9; A0A0P5NEQ8	0	1403.75	2.98	High	0	0.04722
	FALSE	High	IQTTWETLGDKLR		0.00029714	0	15	156	4	A0A0P5Z193; A0A0P5BM18; A0A0P4YK27; A0A0P5GUJ5; A0A0P5I5B7; A0A0P5PPT4; A0A0P5PJQ0; A0A0P5XGU4; A0A0P6FTA8; A0A0P5ECS0; A0A0N8AKQ7; A0A0P5KLT7; A0A0P5NG35; A0A0P5NEQ8; A0A0N8DYK4	1	1560.84	3.5	High	0	0.0001097
	FALSE	High	KEIVGTLLMPIFFNK	1xOxidation [M9]	1.70782e-05	0	22	169	2	A0A0P5Z193; E9HZI6; A0A0P5BM18; A0A0P5S327; A0A0P6FZL4; A0A0P4YK27; A0A0P5IAS3; A0A0P5GUJ5; A0A0P5I5B7; A0A0P5LYR5; A0A0P5PJQ0; A0A0P5XGU4; A0A0P6FTA8; A0A0P5ECS0; A0A0N8AKQ7; A0A0P5KLT7; A0A0P5UT23; A0A0P5NG35; E9GVW7; A0A0P6EEN9; A0A0P5NEQ8; A0A0N8DYK4	1	1765.99	4.02	High	0	4.421e-06
	FALSE	High	KEIVGTLLMPIFFNK		0.000437875	0	22	169	1	A0A0P5Z193; E9HZI6; A0A0P5BM18; A0A0P5S327; A0A0P6FZL4; A0A0P4YK27; A0A0P5IAS3; A0A0P5GUJ5; A0A0P5I5B7; A0A0P5LYR5; A0A0P5PJQ0; A0A0P5XGU4; A0A0P6FTA8; A0A0P5ECS0; A0A0N8AKQ7; A0A0P5KLT7; A0A0P5UT23; A0A0P5NG35; E9GVW7; A0A0P6EEN9; A0A0P5NEQ8; A0A0N8DYK4	1	1750	2.73	High	0	0.0001698
	FALSE	High	GVIYGLEPGR		0.0200387	0	6	67	1	A0A0P5Z193; E9HZI6; A0A0P4YK27; A0A0P5ECS0; A0A0N8AKQ7; A0A0P5J4J3	0	1060.58	2.4	High	0	0.01258
	FALSE	High	IEIFPAQQK		0.0373061	0	10	136	1	E9HZI6; A0A0P5BM18; A0A0P5M269; A0A0P5PPT4; A0A0P5XGU4; A0A0P5ECS0; A0A0N8AKQ7; A0A0P5UT23; A0A0P5YRE9; A0A0P5NEQ8	0	1073.6	2.15	High	0	0.02544
	FALSE	High	KTADNFIEVDSPISHMIR	1xOxidation [M16]	1.72514e-08	0	7	117	3	A0A0P5BM18; A0A0P5M269; A0A0P5XGU4; A0A0P5ECS0; A0A0N8AKQ7; A0A0P5UT23; A0A0P5YRE9	1	2089.04	5.75	High	0	1.876e-09
	FALSE	High	FQQNIYSSQTFR		0.0025825	0	9	122	1	A0A0P5BM18; A0A0P5M269; A0A0P5PPT4; A0A0P5XGU4; A0A0P5ECS0; A0A0N8AKQ7; A0A0P5UT23; A0A0P5YRE9; A0A0P5NEQ8	0	1518.73	3.85	High	0	0.001255
	FALSE	High	IRGVIYGLEPGR		0.068333	0	6	67	1	A0A0P5Z193; E9HZI6; A0A0P4YK27; A0A0P5ECS0; A0A0N8AKQ7; A0A0P5J4J3	1	1329.76	2.33	High	0	0.05026
	FALSE	High	LPVEVVEAEPK		0.000783288	0	8	131	2	A0A0P5Z193; A0A0P5BM18; A0A0N8DZB7; A0A0P5I5B7; A0A0P5LYR5; A0A0P5ECS0; A0A0N8AKQ7; A0A0P5NG35	0	1209.67	3.23	High	0	0.000327
	FALSE	High	QREWSLYLDNASSETK		2.87507e-07	0	15	150	2	A0A0P5Z193; A0A0P5BM18; A0A0P5M269; A0A0P4YK27; A0A0P5GUJ5; A0A0P5I5B7; A0A0P5PPT4; A0A0P5PJQ0; A0A0P5XGU4; A0A0P6FTA8; A0A0P5ECS0; A0A0N8AKQ7; A0A0P5KLT7; A0A0P5UT23; A0A0P5YRE9	1	1926.92	5.66	High	0	4.445e-08
	FALSE	High	QREWSLYLDNASSETK	1xDeamidated [N10]	0.00402342	0	15	150	1	A0A0P5Z193; A0A0P5BM18; A0A0P5M269; A0A0P4YK27; A0A0P5GUJ5; A0A0P5I5B7; A0A0P5PPT4; A0A0P5PJQ0; A0A0P5XGU4; A0A0P6FTA8; A0A0P5ECS0; A0A0N8AKQ7; A0A0P5KLT7; A0A0P5UT23; A0A0P5YRE9	1	1927.9	3.59	High	0	0.002064
	FALSE	High	VNVNGMEISVTSESYTVK		3.20966e-06	0	8	124	1	A0A0P5BM18; A0A0P5M269; A0A0P5PPT4; A0A0P5XGU4; A0A0P5ECS0; A0A0N8AKQ7; A0A0P5YRE9; A0A0P5NEQ8	0	1956.96	3.79	High	0	6.725e-07
	FALSE	High	VNVNGMEISVTSESYTVK	1xDeamidated [N4]	4.57853e-07	0	8	124	1	A0A0P5BM18; A0A0P5M269; A0A0P5PPT4; A0A0P5XGU4; A0A0P5ECS0; A0A0N8AKQ7; A0A0P5YRE9; A0A0P5NEQ8	0	1957.94	3.67	High	0	7.503e-08
	FALSE	High	VNVNGMEISVTSESYTVK	1xOxidation [M6]	3.01596e-05	0	8	124	2	A0A0P5BM18; A0A0P5M269; A0A0P5PPT4; A0A0P5XGU4; A0A0P5ECS0; A0A0N8AKQ7; A0A0P5YRE9; A0A0P5NEQ8	0	1972.95	4.3	High	0	8.375e-06
	FALSE	High	VNVNGMEISVTSESYTVK	1xDeamidated [N4]; 1xOxidation [M6]	4.66922e-06	0	8	124	1	A0A0P5BM18; A0A0P5M269; A0A0P5PPT4; A0A0P5XGU4; A0A0P5ECS0; A0A0N8AKQ7; A0A0P5YRE9; A0A0P5NEQ8	0	1973.94	2.51	High	0	1.027e-06
	FALSE	High	NVNSPMIMEVEPEILKK	1xOxidation [M6]	5.21259e-05	0	11	99	2	E9HZI6; A0A0P5BM18; A0A0P5F867; A0A0P4YK27; A0A0P5PJQ0; A0A0P5ECS0; A0A0N8AKQ7; A0A0P5UT23; E9GVW7; A0A0P6EEN9; A0A0P5NEQ8	1	1987.02	4.21	High	0	1.553e-05
	FALSE	High	NAENEVLAVIKK		0.00104535	0	9	122	1	E9HZI6; A0A0P5BM18; A0A0P5M269; A0A0P5PPT4; A0A0P5XGU4; A0A0P5ECS0; A0A0N8AKQ7; A0A0P5YRE9; A0A0P5NEQ8	1	1327.76	3.67	High	0	0.0004518
	FALSE	High	NAENEVLAVIKK	1xDeamidated [N]	0.000899057	0	9	122	3	E9HZI6; A0A0P5BM18; A0A0P5M269; A0A0P5PPT4; A0A0P5XGU4; A0A0P5ECS0; A0A0N8AKQ7; A0A0P5YRE9; A0A0P5NEQ8	1	1328.74	3.66	High	0	0.0003829
	FALSE	High	IQTTWETLGDK		0.00864996	0	15	156	2	A0A0P5Z193; A0A0P5BM18; A0A0P4YK27; A0A0P5GUJ5; A0A0P5I5B7; A0A0P5PPT4; A0A0P5PJQ0; A0A0P5XGU4; A0A0P6FTA8; A0A0P5ECS0; A0A0N8AKQ7; A0A0P5KLT7; A0A0P5NG35; A0A0P5NEQ8; A0A0N8DYK4	0	1291.65	2.58	High	0	0.004898
	FALSE	High	TDVSLISSLVSLFEESPR		0.000293324	0	5	68	2	E9HZI6; A0A0P4YK27; A0A0P5ECS0; A0A0P4X0S3; A0A0N8AKQ7	0	1979.03	2.73	High	0	0.0001083
	FALSE	High	SILGHAIVIHQLPDDR		1.23332e-06	0	5	70	3	A0A0P5Z193; A0A0P4YK27; A0A0P5ECS0; A0A0P4X0S3; A0A0N8AKQ7	0	1783.98	5.59	High	0	2.294e-07
	FALSE	High	NVNSPMIMEVEPEILKK		2.95169e-05	0	11	99	1	E9HZI6; A0A0P5BM18; A0A0P5F867; A0A0P4YK27; A0A0P5PJQ0; A0A0P5ECS0; A0A0N8AKQ7; A0A0P5UT23; E9GVW7; A0A0P6EEN9; A0A0P5NEQ8	1	1971.03	3.71	High	0	8.154e-06
	FALSE	High	NVNSPMIMEVEPEILKK	2xOxidation [M6; M8]	0.000562166	0	11	99	2	E9HZI6; A0A0P5BM18; A0A0P5F867; A0A0P4YK27; A0A0P5PJQ0; A0A0P5ECS0; A0A0N8AKQ7; A0A0P5UT23; E9GVW7; A0A0P6EEN9; A0A0P5NEQ8	1	2003.02	4.46	High	0	0.0002463
	FALSE	High	ITVATTWTR		0.0397517	0	9	144	2	A0A0P5Z193; A0A0P5BM18; A0A0P5PPT4; A0A0P5XGU4; A0A0P5ECS0; A0A0N8AKQ7; A0A0P5KLT7; A0A0P5YRE9; A0A0P5NEQ8	0	1048.58	2.72	High	0	0.02732
	FALSE	High	ISDFTPAILLSETKR		7.1084e-05	0	4	63	1	A0A0P5Z193; A0A0P5BM18; A0A0P4YK27; A0A0P5ECS0	1	1690.94	2.74	High	0	2.197e-05
	FALSE	High	ILPVFNYNSNQGLR		0.000517985	0	8	110	2	E9HZI6; A0A0P5BM18; A0A0N8DZB7; A0A0P4YK27; A0A0P5LYR5; A0A0P5ECS0; A0A0N8AKQ7; E9GVW7	0	1634.86	3.27	High	0	0.004836
	FALSE	High	ILPVFNYNSNQGLR	1xDeamidated [N6]	0.00189406	0	8	110	2	E9HZI6; A0A0P5BM18; A0A0N8DZB7; A0A0P4YK27; A0A0P5LYR5; A0A0P5ECS0; A0A0N8AKQ7; E9GVW7	0	1635.85	2.56	High	0	0.0008834
	FALSE	High	ILPVFNYNSNQGLR	2xDeamidated [N6; N8]	0.0136322	0	8	110	1	E9HZI6; A0A0P5BM18; A0A0N8DZB7; A0A0P4YK27; A0A0P5LYR5; A0A0P5ECS0; A0A0N8AKQ7; E9GVW7	0	1636.83	1.96	High	0	0.00815
	FALSE	High	AYPTTGVDMEWAAALPGR		4.3208e-06	0	9	118	1	A0A0P5Z193; A0A0P5XPE2; A0A0P5BM18; A0A0P4YK27; A0A0P5PJQ0; A0A0P6FTA8; A0A0P5ECS0; A0A0P5UT23; A0A0N8DYK4	0	1905.92	4.21	High	0	9.415e-07
	FALSE	High	AYPTTGVDMEWAAALPGR	1xOxidation [M9]	5.4526e-06	0	9	118	3	A0A0P5Z193; A0A0P5XPE2; A0A0P5BM18; A0A0P4YK27; A0A0P5PJQ0; A0A0P6FTA8; A0A0P5ECS0; A0A0P5UT23; A0A0N8DYK4	0	1921.91	3.95	High	0	1.219e-06
	FALSE	High	VETVAIGKEEPLWIVNFKR		1.07193e-07	0	7	120	2	A0A0P5Z193; A0A0P5BM18; A0A0P4YK27; A0A0P5LYR5; A0A0P5ECS0; A0A0N8AKQ7; A0A0P5NG35	2	2228.24	5.87	High	0	1.464e-08
	FALSE	High	EEPLWIVNFKR		0.00737852	0	9	123	1	A0A0P5Z193; E9HZI6; A0A0P5BM18; A0A0P4YK27; A0A0P5LYR5; A0A0P5ECS0; A0A0N8AKQ7; A0A0P5NG35; E9GVW7	1	1430.78	2.3	High	0	0.004085
	FALSE	High	LVVKPFSYETEATEGLTVQHLTLR		5.89228e-06	0	5	89	1	A0A0P5Z193; A0A0P5BM18; A0A0N8DZB7; A0A0P5ECS0; A0A0N8AKQ7	0	2731.47	4.58	High	0	1.331e-06
	FALSE	High	KISDFTPAILLSETK		8.22611e-07	0	8	109	2	A0A0P5Z193; A0A0P5I0U9; A0A0P5BM18; A0A0P4YK27; A0A0P5PPT4; A0A0P6FTA8; A0A0P5ECS0; A0A0N8AKQ7	1	1662.93	4.65	High	0	1.453e-07
	FALSE	High	EKSETVFGISDVSPLLPK		4.4254e-05	0	11	125	2	A0A0P5BM18; A0A0P5M269; A0A0P5PPT4; A0A0P5XGU4; A0A0P5ECS0; A0A0N8AKQ7; A0A0P5UT23; A0A0P5YRE9; E9GVW7; A0A0P5NEQ8; A0A0P5L1A1	1	1946.05	3.16	High	0	0.00153
	FALSE	High	LNEDLFVRPLDELMGK	1xOxidation [M14]	0.0113853	0	4	57	1	A0A0P5XGU4; A0A0P5ECS0; A0A0P5YRE9; A0A0P5L1A1	0	1904.98	2.61	High	0	0.006658
	FALSE	High	AIFALSTLAVQK		0.003613	0	12	127	2	A0A0P5Z193; A0A0P5BM18; A0A0P6FZL4; A0A0P4YK27; A0A0P5GUJ5; A0A0P5LYR5; A0A0P5XGU4; A0A0P6FTA8; A0A0P5ECS0; A0A0N8AKQ7; A0A0P5NEQ8; A0A0N8DYK4	0	1261.75	3.19	High	0	0.001831
	FALSE	High	AIFALSTLAVQK	1xDeamidated [Q11]	0.00546083	0	12	127	1	A0A0P5Z193; A0A0P5BM18; A0A0P6FZL4; A0A0P4YK27; A0A0P5GUJ5; A0A0P5LYR5; A0A0P5XGU4; A0A0P6FTA8; A0A0P5ECS0; A0A0N8AKQ7; A0A0P5NEQ8; A0A0N8DYK4	0	1262.74	2.41	High	0	0.002913
	FALSE	High	FVSGKVETVAIGKEEPLWIVNFK	1xDeamidated [N21]	0.0384285	0	7	119	1	A0A0P5Z193; A0A0P5BM18; A0A0P4YK27; A0A0P5LYR5; A0A0P5ECS0; A0A0N8AKQ7; A0A0P5NG35	2	2591.41	1.58	High	0	0.02627
	FALSE	High	IEQGILNGEQSWENVR	2xDeamidated [Q3; Q10]	0.0660939	0	5	66	1	A0A0P5Z193; A0A0P4YK27; A0A0P5ECS0; A0A0N8AKQ7; A0A0P5J4J3	0	1873.89	1.78	High	0	0.04854
	FALSE	High	NVNSPMIMEVEPEILK	1xOxidation [M]	0.00325839	0	11	99	2	E9HZI6; A0A0P5BM18; A0A0P5F867; A0A0P4YK27; A0A0P5PJQ0; A0A0P5ECS0; A0A0N8AKQ7; A0A0P5UT23; E9GVW7; A0A0P6EEN9; A0A0P5NEQ8	0	1858.93	3.37	High	0	0.00163
	FALSE	High	NVNSPMIMEVEPEILK	2xOxidation [M6; M8]	2.51675e-05	0	11	99	1	E9HZI6; A0A0P5BM18; A0A0P5F867; A0A0P4YK27; A0A0P5PJQ0; A0A0P5ECS0; A0A0N8AKQ7; A0A0P5UT23; E9GVW7; A0A0P6EEN9; A0A0P5NEQ8	0	1874.92	3.33	High	0	6.82e-06
	FALSE	High	NAENEVLAVIK	1xDeamidated [N]	0.00203792	0	9	122	2	E9HZI6; A0A0P5BM18; A0A0P5M269; A0A0P5PPT4; A0A0P5XGU4; A0A0P5ECS0; A0A0N8AKQ7; A0A0P5YRE9; A0A0P5NEQ8	0	1200.65	3.27	High	0	0.0009605
	FALSE	High	GIEIHPVAEVILPK		0.000513541	0	6	108	2	A0A0P5BM18; A0A0P5PPT4; A0A0P5XGU4; A0A0P5ECS0; A0A0N8AKQ7; A0A0P5YRE9	0	1514.89	3.18	High	0	0.0004855
	FALSE	High	IEQGILNGEQSWENVR		6.17824e-06	0	5	66	1	A0A0P5Z193; A0A0P4YK27; A0A0P5ECS0; A0A0N8AKQ7; A0A0P5J4J3	0	1871.92	3.85	High	0	1.407e-06
	FALSE	High	AKAIFALSTLAVQK		0.0317518	0	12	127	1	A0A0P5Z193; A0A0P5BM18; A0A0P6FZL4; A0A0P4YK27; A0A0P5GUJ5; A0A0P5LYR5; A0A0P5XGU4; A0A0P6FTA8; A0A0P5ECS0; A0A0N8AKQ7; A0A0P5NEQ8; A0A0N8DYK4	1	1460.88	2.09	High	0	0.02115
	FALSE	High	VPSNLNLEGVERPTNVDSLTLETAAPTRK		1.43129e-05	0	3	66	1	A0A0P4YK27; A0A0P5ECS0; A0A0N8AKQ7	1	3121.65	5.42	High	0	3.616e-06
	FALSE	High	VPSNLNLEGVERPTNVDSLTLETAAPTRK	1xDeamidated [N15]	1.46179e-07	0	3	66	1	A0A0P4YK27; A0A0P5ECS0; A0A0N8AKQ7	1	3122.63	4.49	High	0	2.085e-08
	FALSE	High	AIFALSTLAVQKK		9.08705e-05	0	12	127	1	A0A0P5Z193; A0A0P5BM18; A0A0P6FZL4; A0A0P4YK27; A0A0P5GUJ5; A0A0P5LYR5; A0A0P5XGU4; A0A0P6FTA8; A0A0P5ECS0; A0A0N8AKQ7; A0A0P5NEQ8; A0A0N8DYK4	1	1389.85	3.44	High	0	2.892e-05
	FALSE	High	AIFALSTLAVQKK	1xDeamidated [Q11]	0.000401727	0	12	127	2	A0A0P5Z193; A0A0P5BM18; A0A0P6FZL4; A0A0P4YK27; A0A0P5GUJ5; A0A0P5LYR5; A0A0P5XGU4; A0A0P6FTA8; A0A0P5ECS0; A0A0N8AKQ7; A0A0P5NEQ8; A0A0N8DYK4	1	1390.83	3.67	High	0	0.0001541
	FALSE	High	KISDFTPAILLSETKR		2.86271e-07	0	4	63	2	A0A0P5Z193; A0A0P5BM18; A0A0P4YK27; A0A0P5ECS0	2	1819.03	6.16	High	0	4.44e-08
	FALSE	High	VPSNLNLEGVERPTNVDSLTLETAAPTR		1.67788e-07	0	3	66	2	A0A0P4YK27; A0A0P5ECS0; A0A0N8AKQ7	0	2993.55	5.71	High	0	2.428e-08
	FALSE	High	DLMDVAYELR		0.0185546	0	9	127	1	A0A0P5BM18; A0A0P5M269; A0A0P5PPT4; A0A0P5XGU4; A0A0P5ECS0; A0A0N8AKQ7; A0A0P5UT23; A0A0P5YRE9; A0A0P5NEQ8	0	1224.59	2.47	High	0	0.01156
	FALSE	High	ISSDVHIYQTLAYSYDDDYK		0.000351504	0	9	125	1	A0A0P5Z193; A0A0P5BM18; A0A0P5F867; A0A0N8DZB7; A0A0P5I5B7; A0A0P5LYR5; A0A0P5ECS0; A0A0N8AKQ7; A0A0P5NG35	0	2396.09	3.68	High	0	0.000133
	FALSE	High	EWSLYLDNASSETK		5.73083e-05	0	16	152	1	A0A0P5Z193; A0A0P5BM18; A0A0P5M269; A0A0P4YK27; A0A0P5GUJ5; A0A0P5I5B7; A0A0P5PPT4; A0A0P5PJQ0; A0A0P5XGU4; A0A0P6FTA8; A0A0P5ECS0; A0A0N8AKQ7; A0A0P5KLT7; A0A0P5UT23; A0A0P5YRE9; A0A0N8DYK4	0	1642.76	3.57	High	0	1.721e-05
	FALSE	High	EWSLYLDNASSETK	1xDeamidated [N8]	0.00133051	0	16	152	1	A0A0P5Z193; A0A0P5BM18; A0A0P5M269; A0A0P4YK27; A0A0P5GUJ5; A0A0P5I5B7; A0A0P5PPT4; A0A0P5PJQ0; A0A0P5XGU4; A0A0P6FTA8; A0A0P5ECS0; A0A0N8AKQ7; A0A0P5KLT7; A0A0P5UT23; A0A0P5YRE9; A0A0N8DYK4	0	1643.74	2.49	High	0	0.0005946
	FALSE	High	DLMDVAYELR	1xOxidation [M3]	0.0161111	0	9	127	1	A0A0P5BM18; A0A0P5M269; A0A0P5PPT4; A0A0P5XGU4; A0A0P5ECS0; A0A0N8AKQ7; A0A0P5UT23; A0A0P5YRE9; A0A0P5NEQ8	0	1240.59	3.03	High	0	0.009868
	FALSE	High	LLPAPELCQNFPVYEIVK	1xCarbamidomethyl [C8]	0.000149784	0	11	132	2	A0A0P5Z193; E9HZI6; A0A0P5BM18; A0A0N8DZB7; A0A0P4YK27; A0A0P5I5B7; A0A0P5LYR5; A0A0P5ECS0; A0A0N8AKQ7; A0A0P5NG35; E9GVW7	0	2130.13	3.57	High	0	5.079e-05
	FALSE	High	LCGLCGSQNGDK	2xCarbamidomethyl [C2; C5]	0.0014502	0	8	121	1	A0A0P5BM18; A0A0P5M269; A0A0P5PPT4; A0A0P5XGU4; A0A0P5ECS0; A0A0N8AKQ7; A0A0P5UT23; A0A0P5NEQ8	0	1308.57	2.4	High	0	0.0006534
	FALSE	High	LCGLCGSQNGDK	2xCarbamidomethyl [C2; C5]; 1xDeamidated [N9]	0.00150104	0	8	121	2	A0A0P5BM18; A0A0P5M269; A0A0P5PPT4; A0A0P5XGU4; A0A0P5ECS0; A0A0N8AKQ7; A0A0P5UT23; A0A0P5NEQ8	0	1309.55	2.68	High	0	0.0006812
	FALSE	High	IHEELKIEAR		0.00358203	0	19	168	2	E9HZI6; A0A0P5BM18; A0A0P5S327; A0A0P4YK27; A0A0P5GUJ5; A0A0P5I5B7; A0A0P5PPT4; A0A0P5PJQ0; A0A0P5XGU4; A0A0P6FTA8; A0A0P5ECS0; A0A0N8AKQ7; A0A0P5KLT7; A0A0P5UT23; A0A0P5NG35; E9GVW7; A0A0P6EEN9; A0A0P5NEQ8; A0A0N8DYK4	1	1237.69	3.92	High	0	0.00455
	FALSE	High	HSVVPFTTVRK		0.0297906	0	13	119	1	A0A0P5Z193; A0A0P5I0U9; A0A0P5BM18; A0A0P5GUJ5; A0A0P5PPT4; A0A0P5PJQ0; A0A0P5XGU4; A0A0P5ECS0; A0A0N8AKQ7; A0A0P5UT23; A0A0P5NEQ8; A0A0N8BQS0; A0A0N8DYK4	1	1270.73	3.18	High	0	0.01973
	FALSE	High	YSEVDPGQEVR		0.00347572	0	10	122	2	A0A0P5Z193; E9HZI6; A0A0P5BM18; A0A0N8DZB7; A0A0P4YK27; A0A0P5LYR5; A0A0P5ECS0; A0A0N8AKQ7; A0A0P5NG35; E9GVW7	0	1278.6	3.19	High	0	0.001754
	FALSE	High	RPSQWTVYR		0.0129487	0	9	121	1	E9HZI6; A0A0P5BM18; A0A0P5M269; A0A0P5XGU4; A0A0P5ECS0; A0A0N8AKQ7; A0A0P5UT23; A0A0P5YRE9; A0A0P5NEQ8	0	1192.62	2.63	High	0	0.007689
	FALSE	High	CFSTESVPK	1xCarbamidomethyl [C1]	0.0514139	0	12	119	2	E9HZI6; A0A0P5BM18; A0A0P5M269; A0A0P5PPT4; A0A0P5XGU4; A0A0P5ECS0; A0A0N8AKQ7; A0A0P5UT23; A0A0P5YRE9; E9GVW7; A0A0P5NEQ8; A0A0P5L1A1	0	1054.49	2.58	High	0	0.03656
	FALSE	High	SETVFGISDVSPLLPK		0.000457151	0	11	125	1	A0A0P5BM18; A0A0P5M269; A0A0P5PPT4; A0A0P5XGU4; A0A0P5ECS0; A0A0N8AKQ7; A0A0P5UT23; A0A0P5YRE9; E9GVW7; A0A0P5NEQ8; A0A0P5L1A1	0	1688.91	3.32	High	0	0.0001781
	FALSE	High	IAGEQAVQAISALVPTVETPTK		6.45024e-06	0	8	94	1	A0A0P5BM18; A0A0P4YK27; A0A0P5PJQ0; A0A0P6FTA8; A0A0P5ECS0; A0A0P5UT23; A0A0P5NEQ8; A0A0N8DYK4	0	2223.22	4.13	High	0	1.477e-06
	FALSE	High	RIGSSIVYGMDGK	1xOxidation [M10]	0.00503227	0	13	138	2	A0A0P5Z193; A0A0P5BM18; A0A0P4YK27; A0A0P5GUJ5; A0A0P5PPT4; A0A0P5PJQ0; A0A0P5XGU4; A0A0P5ECS0; A0A0N8AKQ7; A0A0P5KLT7; A0A0P5UT23; A0A0P5YRE9; A0A0P5NEQ8	1	1398.7	2.71	High	0.00329	0.126
	FALSE	High	DWFGTLAFAAMPSTIR	1xOxidation [M11]	0.000513541	0	10	114	2	A0A0P5Z193; A0A0P5BM18; A0A0P5GUJ5; A0A0P5PPT4; A0A0P5XGU4; A0A0P6FTA8; A0A0P5ECS0; A0A0N8AKQ7; A0A0P5UT23; A0A0P5NEQ8	0	1799.88	3.09	High	0	0.0002032
	FALSE	High	ELLTSLMEFLK	1xOxidation [M7]	0.0208242	0	13	108	1	A0A0P5Z193; A0A0P5BM18; A0A0P4YK27; A0A0P5F3B7; A0A0P5RAR4; A0A0P5PJQ0; A0A0P6FTA8; A0A0P5ECS0; A0A0N8AKQ7; A0A0P5UT23; A0A0P6EEN9; A0A0P5NEQ8; A0A0N8DYK4	0	1339.72	2.72	High	0	0.01313
	FALSE	High	ELLTSLMEFLK		0.0618253	0	13	108	1	A0A0P5Z193; A0A0P5BM18; A0A0P4YK27; A0A0P5F3B7; A0A0P5RAR4; A0A0P5PJQ0; A0A0P6FTA8; A0A0P5ECS0; A0A0N8AKQ7; A0A0P5UT23; A0A0P6EEN9; A0A0P5NEQ8; A0A0N8DYK4	0	1323.72	1.64	High	0	0.04502
	FALSE	High	EIVGTLLMPIFFNK	1xOxidation [M8]	0.000105206	0	22	169	3	A0A0P5Z193; E9HZI6; A0A0P5BM18; A0A0P5S327; A0A0P6FZL4; A0A0P4YK27; A0A0P5IAS3; A0A0P5GUJ5; A0A0P5I5B7; A0A0P5LYR5; A0A0P5PJQ0; A0A0P5XGU4; A0A0P6FTA8; A0A0P5ECS0; A0A0N8AKQ7; A0A0P5KLT7; A0A0P5UT23; A0A0P5NG35; E9GVW7; A0A0P6EEN9; A0A0P5NEQ8; A0A0N8DYK4	0	1637.9	3.87	High	0	3.42e-05
	FALSE	High	EIVGTLLMPIFFNK		0.00626649	0	22	169	2	A0A0P5Z193; E9HZI6; A0A0P5BM18; A0A0P5S327; A0A0P6FZL4; A0A0P4YK27; A0A0P5IAS3; A0A0P5GUJ5; A0A0P5I5B7; A0A0P5LYR5; A0A0P5PJQ0; A0A0P5XGU4; A0A0P6FTA8; A0A0P5ECS0; A0A0N8AKQ7; A0A0P5KLT7; A0A0P5UT23; A0A0P5NG35; E9GVW7; A0A0P6EEN9; A0A0P5NEQ8; A0A0N8DYK4	0	1621.9	1.87	High	0	0.003393
	FALSE	High	LTIEPVDESTAVVALLATK		1.12664e-06	0	7	94	2	A0A0P5Z193; A0A0P4YK27; A0A0P5LYR5; A0A0P5ECS0; A0A0N8AKQ7; A0A0P5J4J3; A0A0P5NG35	0	1970.11	4.79	High	0	4.956e-06
	FALSE	High	LAALTLLFVSNPPQAFWSR		0.0037557	0	19	158	1	A0A0P5Z193; E9HZI6; A0A0P5BM18; A0A0P5S327; A0A0P6FZL4; A0A0P4YK27; A0A0P5GUJ5; A0A0P5I5B7; A0A0P5PJQ0; A0A0P5XGU4; A0A0P6FTA8; A0A0P5ECS0; A0A0N8AKQ7; A0A0P5KLT7; A0A0P5UT23; A0A0P5NG35; E9GVW7; A0A0P6EEN9; A0A0P5NEQ8	0	2131.17	2.48	High	0	0.001914
	FALSE	High	ATGQPELYIYLNFLDNYQR		7.26318e-05	0	21	168	1	A0A0P5Z193; E9HZI6; A0A0P5XPE2; A0A0P5BM18; A0A0P5S327; A0A0P4YK27; A0A0P5IAS3; A0A0P5GUJ5; A0A0P5I5B7; A0A0P5PPT4; A0A0P5PJQ0; A0A0P5XGU4; A0A0P5ECS0; A0A0N8AKQ7; A0A0P5KLT7; A0A0P5UT23; A0A0P5NG35; E9GVW7; A0A0P6EEN9; A0A0P5NEQ8; A0A0N8DYK4	0	2318.15	2.83	High	0	2.246e-05
	FALSE	High	LQEECLKEK	1xCarbamidomethyl [C5]	0.0554498	0	12	131	4	E9HZI6; A0A0P5BM18; A0A0P5M269; A0A0P5PPT4; A0A0P5XGU4; A0A0P5ECS0; A0A0N8AKQ7; A0A0P5UT23; A0A0P5YRE9; E9GVW7; A0A0P5NEQ8; A0A0P5L1A1	1	1176.59	2.03	High	0.00329	0.0946
	FALSE	High	HPHYGAIEGQK		0.0238722	0	3	61	1	A0A0P4YK27; A0A0P5ECS0; A0A0N8AKQ7	0	1236.61	2.3	High	0	0.01534
	FALSE	High	LLSEIISDVESEAYYVDPSTK		3.49175e-05	0	6	88	6	A0A0P5Z193; A0A0P5BM18; A0A0P5PJQ0; A0A0P5ECS0; A0A0N8AKQ7; A0A0P5NEQ8	0	2358.16	3.86	High	0	9.862e-06
	FALSE	High	LVMGEFCNPSDSIVASQLVPYLAEQAK	1xCarbamidomethyl [C7]; 1xOxidation [M3]	4.74122e-05	0	13	136	1	E9HZI6; A0A0P5BM18; A0A0P5I5B7; A0A0P5RAR4; A0A0P5PJQ0; A0A0P6FTA8; A0A0P5ECS0; A0A0N8AKQ7; A0A0P5KLT7; A0A0P5UT23; A0A0P5NG35; A0A0P6EEN9; A0A0P5NEQ8	0	2982.46	4.82	High	0	1.393e-05
	FALSE	High	GRLCGLCGSQNGDK	2xCarbamidomethyl [C4; C7]; 1xDeamidated [N11]	0.0394168	0	8	119	1	A0A0P5BM18; A0A0P5M269; A0A0P5PPT4; A0A0P5XGU4; A0A0P5ECS0; A0A0N8AKQ7; A0A0P5UT23; A0A0P5NEQ8	1	1522.67	2.71	High	0	0.027
	FALSE	High	CNLVNGAGCENK	2xCarbamidomethyl [C1; C9]	0.000721732	0	9	126	2	E9HZI6; A0A0P5BM18; A0A0N8DZB7; A0A0P5I5B7; A0A0P5LYR5; A0A0P5ECS0; A0A0N8AKQ7; A0A0P5NG35; E9GVW7	0	1335.58	3.23	High	0	0.000299
	FALSE	High	CNLVNGAGCENK	2xCarbamidomethyl [C1; C9]; 1xDeamidated [N5]	0.0153042	0	9	126	1	E9HZI6; A0A0P5BM18; A0A0N8DZB7; A0A0P5I5B7; A0A0P5LYR5; A0A0P5ECS0; A0A0N8AKQ7; A0A0P5NG35; E9GVW7	0	1336.56	1.83	High	0	0.009289
	FALSE	High	GRLCGLCGSQNGDK	2xCarbamidomethyl [C4; C7]	0.0202972	0	8	119	1	A0A0P5BM18; A0A0P5M269; A0A0P5PPT4; A0A0P5XGU4; A0A0P5ECS0; A0A0N8AKQ7; A0A0P5UT23; A0A0P5NEQ8	1	1521.69	2.46	High	0	0.0128
	FALSE	High	LSYVEEPKENK		0.00320277	0	11	108	4	A0A0P5Z193; A0A0P5XPE2; A0A0P5BM18; A0A0P4YK27; A0A0P5I5B7; A0A0P5PJQ0; A0A0P5XGU4; A0A0P5ECS0; A0A0P5KLT7; A0A0P5UT23; A0A0N8DYK4	1	1335.68	2.92	High	0	0.001599
	FALSE	High	RLSYVEEPKENK		0.00971345	0	11	108	4	A0A0P5Z193; A0A0P5XPE2; A0A0P5BM18; A0A0P4YK27; A0A0P5I5B7; A0A0P5PJQ0; A0A0P5XGU4; A0A0P5ECS0; A0A0P5KLT7; A0A0P5UT23; A0A0N8DYK4	2	1491.78	3.37	High	0	0.005556
	FALSE	High	GMSDECIAAR	1xCarbamidomethyl [C6]; 1xOxidation [M2]	0.00498916	0	6	83	1	A0A0P5Z193; A0A0P5BM18; A0A0P5M269; A0A0P5XGU4; A0A0P5ECS0; A0A0P5YRE9	0	1125.47	2.3	High	0	0.002629
	FALSE	High	VANKNPLNREETVR		0.00482037	0	18	159	2	A0A0P5BM18; A0A0P5S327; A0A0P6FZL4; A0A0P4YK27; A0A0P5IAS3; A0A0P5GUJ5; A0A0P5I5B7; A0A0P5PJQ0; A0A0P5XGU4; A0A0P6FTA8; A0A0P5ECS0; A0A0N8AKQ7; A0A0P5KLT7; A0A0P5UT23; A0A0P5NG35; A0A0P6EEN9; A0A0P5NEQ8; A0A0N8DYK4	2	1639.89	2.96	High	0	0.002533
	FALSE	High	VANKNPLNREETVR	1xDeamidated [N]	0.0275941	0	18	159	2	A0A0P5BM18; A0A0P5S327; A0A0P6FZL4; A0A0P4YK27; A0A0P5IAS3; A0A0P5GUJ5; A0A0P5I5B7; A0A0P5PJQ0; A0A0P5XGU4; A0A0P6FTA8; A0A0P5ECS0; A0A0N8AKQ7; A0A0P5KLT7; A0A0P5UT23; A0A0P5NG35; A0A0P6EEN9; A0A0P5NEQ8; A0A0N8DYK4	2	1640.87	2.08	High	0	0.01806
	FALSE	High	EKIEIFPAQQK		0.0100529	0	10	136	1	E9HZI6; A0A0P5BM18; A0A0P5M269; A0A0P5PPT4; A0A0P5XGU4; A0A0P5ECS0; A0A0N8AKQ7; A0A0P5UT23; A0A0P5YRE9; A0A0P5NEQ8	1	1330.74	2.7	High	0	0.005796
	FALSE	High	IIDQEHLEKPFQVK		2.09114e-05	0	9	122	4	E9HZI6; A0A0P5BM18; A0A0N8DZB7; A0A0P4YK27; A0A0P5LYR5; A0A0P5ECS0; A0A0N8AKQ7; A0A0P5NG35; E9GVW7	0	1723.94	3.97	High	0	5.542e-06
	FALSE	High	HGLHVHAGTTLGDQCDSVGGQFVPAEK	1xCarbamidomethyl [C15]	6.75715e-10	0	5	65	1	A0A0P5Z193; A0A0P4YK27; A0A0P5ECS0; A0A0N8AKQ7; A0A0P5J4J3	0	2817.34	7.38	High	0	4.899e-11
	FALSE	High	HGLHVHAGTTLGDQCDSVGGQFVPAEK	1xCarbamidomethyl [C15]; 1xDeamidated [Q14]	4.56994e-11	0	5	65	1	A0A0P5Z193; A0A0P4YK27; A0A0P5ECS0; A0A0N8AKQ7; A0A0P5J4J3	0	2818.32	5.93	High	0	2.36472e-12
	FALSE	High	HSVVPFTTVR		0.0110959	0	13	120	1	A0A0P5Z193; A0A0P5I0U9; A0A0P5BM18; A0A0P5GUJ5; A0A0P5PPT4; A0A0P5PJQ0; A0A0P5XGU4; A0A0P5ECS0; A0A0N8AKQ7; A0A0P5UT23; A0A0P5NEQ8; A0A0N8BQS0; A0A0N8DYK4	0	1142.63	2.74	High	0	0.006459
	FALSE	High	SNKDESSIISPELEK		3.41579e-07	0	16	145	2	A0A0P5Z193; A0A0P5XPE2; A0A0P5BM18; A0A0P5S327; A0A0P4YK27; A0A0P5IAS3; A0A0P5GUJ5; A0A0P5I5B7; A0A0P5PJQ0; A0A0P5XGU4; A0A0P6FTA8; A0A0P5ECS0; A0A0P5UT23; A0A0P6EEN9; A0A0P5NEQ8; A0A0N8DYK4	1	1675.84	4.32	High	0	5.409e-08
	FALSE	High	KIVTVLLNK		0.0132861	0	9	142	1	A0A0P5BM18; A0A0P5M269; A0A0P5PPT4; A0A0P5XGU4; A0A0P5ECS0; A0A0N8AKQ7; A0A0P5UT23; A0A0P5YRE9; A0A0P5NEQ8	1	1027.69	3.37	High	0	0.007914
	FALSE	High	IIGCTSNEGHFIVQR	1xCarbamidomethyl [C4]	1.19668e-06	0	9	122	2	A0A0P5Z193; A0A0P5BM18; A0A0N8DZB7; A0A0P4YK27; A0A0P5I5B7; A0A0P5LYR5; A0A0P5ECS0; A0A0N8AKQ7; A0A0P5NG35	0	1730.86	4.84	High	0	2.218e-07
	FALSE	High	GRLCGLCGSQNGDKVTDLTGPR	2xCarbamidomethyl [C4; C7]; 1xDeamidated [N/Q]	2.08925e-09	0	7	106	4	A0A0P5BM18; A0A0P5M269; A0A0P5PPT4; A0A0P5XGU4; A0A0P5ECS0; A0A0N8AKQ7; A0A0P5UT23	2	2362.12	6.69	High	0	1.945e-07
	FALSE	High	SLFDTIYGEQIMSQEYVR	1xOxidation [M12]	6.41011e-05	0	10	94	1	A0A0P5I0U9; A0A0P5BM18; A0A0P4YK27; A0A0P5GUJ5; A0A0P5PPT4; A0A0P5PJQ0; A0A0P5ECS0; A0A0N8AKQ7; A0A0P5NEQ8; A0A0N8DYK4	0	2195.03	2.86	High	0	1.952e-05
	FALSE	High	AESEDWEDEALCNLVR	1xCarbamidomethyl [C12]	1.02918e-06	0	16	156	1	A0A0P5Z193; A0A0P5BM18; A0A0P4YK27; A0A0P5IAS3; A0A0P5I5B7; A0A0P5LYR5; A0A0P5PJQ0; A0A0P5XGU4; A0A0P6FTA8; A0A0P5ECS0; A0A0N8AKQ7; A0A0P5KLT7; A0A0P5UT23; A0A0P5NG35; A0A0P5NEQ8; A0A0N8DYK4	0	1935.84	4.34	High	0	1.871e-07
	FALSE	High	LAVVQPSVYSK		0.00621283	0	14	125	2	A0A0P5Z193; A0A0P5I0U9; A0A0P5BM18; A0A0P4YK27; A0A0P5GUJ5; A0A0P5PPT4; A0A0P5PJQ0; A0A0P5XGU4; A0A0P6FTA8; A0A0P5ECS0; A0A0N8AKQ7; A0A0P5NEQ8; A0A0N8BQS0; A0A0N8DYK4	0	1190.68	3.16	High	0	0.003369
	FALSE	High	HGLHVHAGTTLGDQCDSVGGQFVPAEKYESER	1xCarbamidomethyl [C15]; 1xDeamidated [Q]	2.74603e-10	0	5	65	3	A0A0P5Z193; A0A0P4YK27; A0A0P5ECS0; A0A0N8AKQ7; A0A0P5J4J3	1	3482.6	7.06	High	0	2.631e-08
	FALSE	High	LCGLCGSQNGDKVTDLTGPR	2xCarbamidomethyl [C2; C5]	1.06274e-07	0	7	108	2	A0A0P5BM18; A0A0P5M269; A0A0P5PPT4; A0A0P5XGU4; A0A0P5ECS0; A0A0N8AKQ7; A0A0P5UT23	1	2148.02	4.89	High	0	6.056e-07
	FALSE	High	LCGLCGSQNGDKVTDLTGPR	2xCarbamidomethyl [C2; C5]; 1xDeamidated [N9]	8.15183e-09	0	7	108	4	A0A0P5BM18; A0A0P5M269; A0A0P5PPT4; A0A0P5XGU4; A0A0P5ECS0; A0A0N8AKQ7; A0A0P5UT23	1	2149	6.14	High	0	8.091e-10
	FALSE	High	ISDFTPAILLSETK		4.4637e-05	0	8	109	1	A0A0P5Z193; A0A0P5I0U9; A0A0P5BM18; A0A0P4YK27; A0A0P5PPT4; A0A0P6FTA8; A0A0P5ECS0; A0A0N8AKQ7	0	1534.84	4.06	High	0	1.303e-05
	FALSE	High	IGSSIVYGMDGK	1xOxidation [M9]	0.00385394	0	13	138	1	A0A0P5Z193; A0A0P5BM18; A0A0P4YK27; A0A0P5GUJ5; A0A0P5PPT4; A0A0P5PJQ0; A0A0P5XGU4; A0A0P5ECS0; A0A0N8AKQ7; A0A0P5KLT7; A0A0P5UT23; A0A0P5YRE9; A0A0P5NEQ8	0	1242.6	3.29	High	0	0.001964
	FALSE	High	FKSNKDESSIISPELEK		1.6924e-07	0	16	144	3	A0A0P5Z193; A0A0P5XPE2; A0A0P5BM18; A0A0P5S327; A0A0P4YK27; A0A0P5IAS3; A0A0P5GUJ5; A0A0P5I5B7; A0A0P5PJQ0; A0A0P5XGU4; A0A0P6FTA8; A0A0P5ECS0; A0A0P5UT23; A0A0P6EEN9; A0A0P5NEQ8; A0A0N8DYK4	2	1951	5.15	High	0	2.455e-08
	FALSE	High	AVMTIKYNEMPAVVR	2xOxidation [M3; M10]	0.0313497	0	11	151	1	A0A0P5Z193; A0A0P5BM18; A0A0P5M269; A0A0P5PPT4; A0A0P5XGU4; A0A0P5ECS0; A0A0N8AKQ7; A0A0P5KLT7; A0A0P5UT23; A0A0P5YRE9; A0A0P5NEQ8	1	1753.9	2.67	High	0	0.02089
	FALSE	High	ISYVEEPKENKVTFGEK		0.000116666	0	7	67	4	A0A0P5XPE2; A0A0P5BM18; A0A0P4YK27; A0A0P5XGU4; A0A0P5ECS0; A0A0P5UT23; A0A0N8DYK4	2	1997.02	4.03	High	0	4.26e-05
	FALSE	High	LSYVEEPKENKVTFGEK	1xDeamidated [N10]	0.00355133	0	7	67	2	A0A0P5XPE2; A0A0P5BM18; A0A0P4YK27; A0A0P5XGU4; A0A0P5ECS0; A0A0P5UT23; A0A0N8DYK4	2	1998.01	3.06	High	0	0.00179
	FALSE	High	IVTVLLNKEK		0.062344	0	9	139	1	A0A0P5BM18; A0A0P5M269; A0A0P5PPT4; A0A0P5XGU4; A0A0P5ECS0; A0A0N8AKQ7; A0A0P5UT23; A0A0P5YRE9; A0A0P5NEQ8	1	1156.73	2.18	High	0	0.04544
	FALSE	High	FVSGKVETVAIGK		0.0533949	0	8	126	1	A0A0P5Z193; A0A0P5BM18; A0A0N8DZB7; A0A0P4YK27; A0A0P5LYR5; A0A0P5ECS0; A0A0N8AKQ7; A0A0P5NG35	1	1334.77	1.9	High	0	0.03817
	FALSE	High	FFTINPNTIFR		0.00643025	0	19	164	3	A0A0P5XPE2; A0A0P5BM18; A0A0P5S327; A0A0P4YK27; A0A0P5IAS3; A0A0P5I5B7; A0A0P5PPT4; A0A0P5PJQ0; A0A0P5XGU4; A0A0P6FTA8; A0A0P5ECS0; A0A0N8AKQ7; A0A0P5R4V4; A0A0P5KLT7; A0A0P5UT23; A0A0P5NG35; A0A0P6EEN9; A0A0P5NEQ8; A0A0N8DYK4	0	1369.73	2.68	High	0	0.004597
	FALSE	High	IEGALKPVVVSK		0.000210513	0	13	162	6	A0A0P5XPE2; A0A0P5BM18; A0A0P5I5B7; A0A0P5PPT4; A0A0P5XGU4; A0A0P6FTA8; A0A0P5ECS0; A0A0N8AKQ7; A0A0P5KLT7; A0A0P5NG35; A0A0P5NEQ8; A0A0N8BQS0; A0A0N8DYK4	0	1239.77	3.92	High	0	7.445e-05
	FALSE	High	LMMEQASISSPVK		0.00243143	0	2	61	1	A0A0P5ECS0; A0A0N8AKQ7	0	1420.72	3.47	High	0	0.001172
	FALSE	High	LMMEQASISSPVK	1xOxidation [M]	0.0041823	0	2	61	2	A0A0P5ECS0; A0A0N8AKQ7	0	1436.71	2.68	High	0	0.002159
	FALSE	High	LMMEQASISSPVK	2xOxidation [M2; M3]	0.00119984	0	2	61	1	A0A0P5ECS0; A0A0N8AKQ7	0	1452.71	2.98	High	0	0.0005296
	FALSE	High	SEEDISPSLR		0.0253406	0	9	129	1	A0A0P5Z193; A0A0P5BM18; A0A0P5PPT4; A0A0P5XGU4; A0A0P5ECS0; A0A0N8AKQ7; A0A0P5KLT7; A0A0P5YRE9; A0A0P5NEQ8	0	1132.55	2.73	High	0	0.01641
	FALSE	High	GRLTIEPVDESTAVVALLATK		9.04799e-05	0	6	92	2	A0A0P5Z193; A0A0P4YK27; A0A0P5LYR5; A0A0P5ECS0; A0A0P5J4J3; A0A0P5NG35	1	2183.23	4.52	High	0	2.882e-05
	FALSE	High	ENAGKWEINFHK		0.0153698	0	14	121	1	A0A0P5Z193; A0A0P5XPE2; A0A0P5BM18; A0A0P5S327; A0A0P5IAS3; A0A0P5GUJ5; A0A0P5PJQ0; A0A0P6FTA8; A0A0P5ECS0; A0A0P5UT23; A0A0P6EEN9; A0A0P5NEQ8; A0A0N8BQS0; A0A0N8DYK4	1	1472.73	3.02	High	0	0.009346
	FALSE	High	EEPLWIVNFK		0.0103152	0	9	124	1	A0A0P5Z193; E9HZI6; A0A0P5BM18; A0A0P4YK27; A0A0P5LYR5; A0A0P5ECS0; A0A0N8AKQ7; A0A0P5NG35; E9GVW7	0	1274.68	2.1	High	0	0.005951
	FALSE	High	LMEISIDSK		0.0556828	0	17	161	1	A0A0P5Z193; A0A0P5XPE2; A0A0P5BM18; A0A0P5S327; A0A0P5GUJ5; A0A0P5I5B7; A0A0P5PPT4; A0A0P5PJQ0; A0A0P5XGU4; A0A0P6FTA8; A0A0P5ECS0; A0A0N8AKQ7; A0A0P5KLT7; A0A0P5UT23; A0A0P5NG35; A0A0P6EEN9; A0A0P5NEQ8	0	1035.54	2.39	High	0	0.03997
	FALSE	High	LMEISIDSK	1xOxidation [M2]	0.0476639	0	17	161	1	A0A0P5Z193; A0A0P5XPE2; A0A0P5BM18; A0A0P5S327; A0A0P5GUJ5; A0A0P5I5B7; A0A0P5PPT4; A0A0P5PJQ0; A0A0P5XGU4; A0A0P6FTA8; A0A0P5ECS0; A0A0N8AKQ7; A0A0P5KLT7; A0A0P5UT23; A0A0P5NG35; A0A0P6EEN9; A0A0P5NEQ8	0	1051.53	2.43	High	0	0.03344
	FALSE	High	YNEMPAVVR		0.0851047	0.000973478	11	152	1	A0A0P5Z193; A0A0P5BM18; A0A0P5M269; A0A0P5PPT4; A0A0P5XGU4; A0A0P5ECS0; A0A0N8AKQ7; A0A0P5KLT7; A0A0P5UT23; A0A0P5YRE9; A0A0P5NEQ8	0	1078.53	2.45	High	0.0007147	0.06469
	FALSE	High	RCFSTESVPK	1xCarbamidomethyl [C2]	0.080995	0.000973478	12	119	1	E9HZI6; A0A0P5BM18; A0A0P5M269; A0A0P5PPT4; A0A0P5XGU4; A0A0P5ECS0; A0A0N8AKQ7; A0A0P5UT23; A0A0P5YRE9; E9GVW7; A0A0P5NEQ8; A0A0P5L1A1	1	1210.59	2.99	High	0.0007147	0.06121
	FALSE	High	KIEQGILNGEQSWENVR		0.0706447	0.000973478	5	65	1	A0A0P5Z193; A0A0P4YK27; A0A0P5ECS0; A0A0N8AKQ7; A0A0P5J4J3	1	2000.02	1.18	High	0.0007147	0.05234
	FALSE	High	ITTALSLSR		0.0858086	0.000973478	17	144	1	A0A0P5Z193; E9HZI6; A0A0P5BM18; A0A0P5F867; A0A0P5S327; A0A0P4YK27; A0A0P5I5B7; A0A0P5LYR5; A0A0P5PJQ0; A0A0P5ECS0; A0A0N8AKQ7; A0A0P5KLT7; A0A0P5NG35; E9GVW7; A0A0P6EEN9; A0A0P5NEQ8; A0A0N8DYK4	0	961.568	2.48	High	0.0007147	0.06514
	FALSE	High	YWPLLDSFAR		0.0783607	0.000973478	11	116	2	A0A0P5Z193; A0A0P5BM18; A0A0P5S327; A0A0P5IAS3; A0A0P5PJQ0; A0A0P6FTA8; A0A0P5ECS0; A0A0P5UT23; A0A0P6EEN9; A0A0P5NEQ8; A0A0N8BQS0	0	1267.65	1.84	High	0.003911	0.1302
	FALSE	High	YNEMPAVVR	1xOxidation [M4]	0.0721274	0.000973478	11	152	1	A0A0P5Z193; A0A0P5BM18; A0A0P5M269; A0A0P5PPT4; A0A0P5XGU4; A0A0P5ECS0; A0A0N8AKQ7; A0A0P5KLT7; A0A0P5UT23; A0A0P5YRE9; A0A0P5NEQ8	0	1094.53	2.47	High	0.0007147	0.05362
	FALSE	High	KITVATTWTR		0.0751824	0.000973478	9	142	2	A0A0P5Z193; A0A0P5BM18; A0A0P5PPT4; A0A0P5XGU4; A0A0P5ECS0; A0A0N8AKQ7; A0A0P5KLT7; A0A0P5YRE9; A0A0P5NEQ8	1	1176.67	3.33	High	0.008045	0.1851
	FALSE	High	SVGYLGNIK		0.114654	0.0018991	6	70	2	A0A0P5Z193; A0A0P4YK27; A0A0P5ECS0; A0A0P4X0S3; A0A0N8AKQ7; A0A0P5J4J3	0	950.531	2.05	High	0.001394	0.09067
	FALSE	High	QQDSQWESQK		0.115584	0.00283597	17	158	1	A0A0P5I0U9; E9HZI6; A0A0P5BM18; A0A0P5M269; A0A0P4YK27; A0A0P5GUJ5; A0A0P5I5B7; A0A0P5PPT4; A0A0P5PJQ0; A0A0P5XGU4; A0A0P5ECS0; A0A0N8AKQ7; A0A0P5KLT7; A0A0P5UT23; A0A0P5YRE9; E9GVW7; A0A0P5NEQ8	0	1263.56	1.69	High	0.002777	0.09138
	FALSE	High	VETVAIGK		0.135175	0.00358207	8	127	1	A0A0P5Z193; A0A0P5BM18; A0A0N8DZB7; A0A0P4YK27; A0A0P5LYR5; A0A0P5ECS0; A0A0N8AKQ7; A0A0P5NG35	0	816.483	2	High	0.00329	0.1092
	FALSE	High	FAIEGDMK		0.149869	0.00358207	16	149	2	A0A0P5Z193; A0A0P5XPE2; A0A0P5BM18; A0A0P4YK27; A0A0P5GUJ5; A0A0P5I5B7; A0A0P5PPT4; A0A0P6FTA8; A0A0P5ECS0; A0A0N8AKQ7; A0A0P5KLT7; A0A0P5UT23; A0A0P5NG35; A0A0P5NEQ8; A0A0N8BQS0; A0A0N8DYK4	0	910.434	2.01	High	0.00329	0.1224
	FALSE	High	LGFHCLPK	1xCarbamidomethyl [C5]	0.131449	0.00358207	12	122	1	E9HZI6; A0A0P5BM18; A0A0P5M269; A0A0P5PPT4; A0A0P5XGU4; A0A0P5ECS0; A0A0N8AKQ7; A0A0P5UT23; A0A0P5YRE9; E9GVW7; A0A0P5NEQ8; A0A0P5L1A1	0	971.513	2.23	High	0.00329	0.1058
	FALSE	High	GIEIHPVAEVILPKR		0.146356	0.00358207	6	108	1	A0A0P5BM18; A0A0P5PPT4; A0A0P5XGU4; A0A0P5ECS0; A0A0N8AKQ7; A0A0P5YRE9	1	1671	1.8	High	0.00329	0.1196
	FALSE	High	IVTVLLNK		0.152253	0.00358207	9	145	2	A0A0P5BM18; A0A0P5M269; A0A0P5PPT4; A0A0P5XGU4; A0A0P5ECS0; A0A0N8AKQ7; A0A0P5UT23; A0A0P5YRE9; A0A0P5NEQ8	0	899.592	2.75	High	0.00329	0.1251
	FALSE	High	SATPTGYSK		0.141787	0.00358207	11	127	1	A0A0P5Z193; E9HZI6; A0A0P5BM18; A0A0P5F867; A0A0N8DZB7; A0A0P5I5B7; A0A0P5LYR5; A0A0P5ECS0; A0A0N8AKQ7; A0A0P5NG35; E9GVW7	0	911.447	1.56	High	0.00329	0.1154
	FALSE	High	EIVGTLLMPIFFNKAEETEVR	1xOxidation [M8]	0.162767	0.00527855	21	163	1	A0A0P5Z193; E9HZI6; A0A0P5BM18; A0A0P6FZL4; A0A0P4YK27; A0A0P5IAS3; A0A0P5GUJ5; A0A0P5I5B7; A0A0P5LYR5; A0A0P5PJQ0; A0A0P5XGU4; A0A0P6FTA8; A0A0P5ECS0; A0A0N8AKQ7; A0A0P5KLT7; A0A0P5UT23; A0A0P5NG35; E9GVW7; A0A0P6EEN9; A0A0P5NEQ8; A0A0N8DYK4	1	2452.28	1.46	High	0.004515	0.1346
	FALSE	High	LSYVEEPK		0.184315	0.00607653	11	108	2	A0A0P5Z193; A0A0P5XPE2; A0A0P5BM18; A0A0P4YK27; A0A0P5I5B7; A0A0P5PJQ0; A0A0P5XGU4; A0A0P5ECS0; A0A0P5KLT7; A0A0P5UT23; A0A0N8DYK4	0	964.499	1.97	High	0.005091	0.1552
	FALSE	High	LVGKPGLR		0.185741	0.00607653	19	162	1	A0A0P5Z193; E9HZI6; A0A0P5BM18; A0A0P5S327; A0A0P5GUJ5; A0A0P5I5B7; A0A0P5PPT4; A0A0P5PJQ0; A0A0P5XGU4; A0A0P6FTA8; A0A0P5ECS0; A0A0N8AKQ7; A0A0P5KLT7; A0A0P5UT23; A0A0P5NG35; E9GVW7; A0A0P6EEN9; A0A0P5NEQ8; A0A0N8DYK4	0	839.546	1.78	High	0.005091	0.1564
	FALSE	High	ISHSDTVR		0.202835	0.00767163	9	128	1	A0A0P5Z193; A0A0P5BM18; A0A0N8DZB7; A0A0P4YK27; A0A0P5I5B7; A0A0P5LYR5; A0A0P5ECS0; A0A0N8AKQ7; A0A0P5NG35	0	914.469	1.1	High	0.006261	0.1731
	FALSE	High	VTDLTGPR		0.19825	0.00767163	10	120	1	E9HZI6; A0A0P5BM18; A0A0P5M269; A0A0P5PPT4; A0A0P5XGU4; A0A0P5ECS0; A0A0N8AKQ7; A0A0P5UT23; A0A0P5YRE9; E9GVW7	0	858.468	2.15	High	0.006261	0.1686
FALSE	High	Master Protein	A0A0N8AKQ7	Copper-zinc cu-zn superoxide dismutase OS=Daphnia magna PE=4 SV=1	0	693.573	54.073	119	235	2	1	2001	224.5	7.02	717.55	119
	Checked	Confidence	Sequence	Modifications	Qvality PEP	Qvality q-value	# Protein Groups	# Proteins	# PSMs	Master Protein Accessions	# Missed Cleavages	Theo. MH+ [Da]	XCorr Sequest HT	Confidence Sequest HT	Percolator q-Value Sequest HT	Percolator PEP Sequest HT
	FALSE	High	VLTDAKEVVVLASPIHR		2.30348e-06	0	5	70	2	E9HZI6; A0A0P5M269; A0A0P5PPT4; A0A0N8AKQ7; A0A0P5YRE9	1	1847.07	6.26	High	0	4.637e-07
	FALSE	High	HLGMDFVFVER	1xOxidation [M4]	0.000872352	0	12	112	2	A0A0P5I0U9; A0A0P5BM18; A0A0P4YK27; A0A0P5GUJ5; A0A0P5PPT4; A0A0P5PJQ0; A0A0P5XGU4; A0A0P5ECS0; A0A0N8AKQ7; A0A0P5UT23; A0A0P5NEQ8; A0A0N8DYK4	0	1365.66	3.36	High	0	0.01263
	FALSE	High	HLGMDFVFVER		0.000610115	0	12	112	1	A0A0P5I0U9; A0A0P5BM18; A0A0P4YK27; A0A0P5GUJ5; A0A0P5PPT4; A0A0P5PJQ0; A0A0P5XGU4; A0A0P5ECS0; A0A0N8AKQ7; A0A0P5UT23; A0A0P5NEQ8; A0A0N8DYK4	0	1349.67	2.91	High	0	0.0002464
	FALSE	High	KIEQGILNGEQSWENVR	1xDeamidated [N8]	1.14401e-05	0	5	65	2	A0A0P5Z193; A0A0P4YK27; A0A0P5ECS0; A0A0N8AKQ7; A0A0P5J4J3	1	2001	5.69	High	0	2.818e-06
	FALSE	High	VETVAIGKEEPLWIVNFK		1.6249e-06	0	7	120	2	A0A0P5Z193; A0A0P5BM18; A0A0P4YK27; A0A0P5LYR5; A0A0P5ECS0; A0A0N8AKQ7; A0A0P5NG35	1	2072.14	6.5	High	0	3.134e-07
	FALSE	High	TADNFIEVDSPISHMIR	1xOxidation [M15]	4.24698e-06	0	7	118	3	A0A0P5BM18; A0A0P5M269; A0A0P5XGU4; A0A0P5ECS0; A0A0N8AKQ7; A0A0P5UT23; A0A0P5YRE9	0	1960.94	4.91	High	0	9.198e-07
	FALSE	High	VFKPYSNVFFR		0.0644609	0	7	111	1	A0A0P5BM18; A0A0P5PPT4; A0A0P5XGU4; A0A0P5ECS0; A0A0N8AKQ7; A0A0P5YRE9; A0A0P5NEQ8	0	1403.75	2.98	High	0	0.04722
	FALSE	High	IQTTWETLGDKLR		0.00029714	0	15	156	4	A0A0P5Z193; A0A0P5BM18; A0A0P4YK27; A0A0P5GUJ5; A0A0P5I5B7; A0A0P5PPT4; A0A0P5PJQ0; A0A0P5XGU4; A0A0P6FTA8; A0A0P5ECS0; A0A0N8AKQ7; A0A0P5KLT7; A0A0P5NG35; A0A0P5NEQ8; A0A0N8DYK4	1	1560.84	3.5	High	0	0.0001097
	FALSE	High	KEIVGTLLMPIFFNK	1xOxidation [M9]	1.70782e-05	0	22	169	2	A0A0P5Z193; E9HZI6; A0A0P5BM18; A0A0P5S327; A0A0P6FZL4; A0A0P4YK27; A0A0P5IAS3; A0A0P5GUJ5; A0A0P5I5B7; A0A0P5LYR5; A0A0P5PJQ0; A0A0P5XGU4; A0A0P6FTA8; A0A0P5ECS0; A0A0N8AKQ7; A0A0P5KLT7; A0A0P5UT23; A0A0P5NG35; E9GVW7; A0A0P6EEN9; A0A0P5NEQ8; A0A0N8DYK4	1	1765.99	4.02	High	0	4.421e-06
	FALSE	High	KEIVGTLLMPIFFNK		0.000437875	0	22	169	1	A0A0P5Z193; E9HZI6; A0A0P5BM18; A0A0P5S327; A0A0P6FZL4; A0A0P4YK27; A0A0P5IAS3; A0A0P5GUJ5; A0A0P5I5B7; A0A0P5LYR5; A0A0P5PJQ0; A0A0P5XGU4; A0A0P6FTA8; A0A0P5ECS0; A0A0N8AKQ7; A0A0P5KLT7; A0A0P5UT23; A0A0P5NG35; E9GVW7; A0A0P6EEN9; A0A0P5NEQ8; A0A0N8DYK4	1	1750	2.73	High	0	0.0001698
	FALSE	High	GVIYGLEPGR		0.0200387	0	6	67	1	A0A0P5Z193; E9HZI6; A0A0P4YK27; A0A0P5ECS0; A0A0N8AKQ7; A0A0P5J4J3	0	1060.58	2.4	High	0	0.01258
	FALSE	High	IEIFPAQQK		0.0373061	0	10	136	1	E9HZI6; A0A0P5BM18; A0A0P5M269; A0A0P5PPT4; A0A0P5XGU4; A0A0P5ECS0; A0A0N8AKQ7; A0A0P5UT23; A0A0P5YRE9; A0A0P5NEQ8	0	1073.6	2.15	High	0	0.02544
	FALSE	High	KTADNFIEVDSPISHMIR	1xOxidation [M16]	1.72514e-08	0	7	117	3	A0A0P5BM18; A0A0P5M269; A0A0P5XGU4; A0A0P5ECS0; A0A0N8AKQ7; A0A0P5UT23; A0A0P5YRE9	1	2089.04	5.75	High	0	1.876e-09
	FALSE	High	FQQNIYSSQTFR		0.0025825	0	9	122	1	A0A0P5BM18; A0A0P5M269; A0A0P5PPT4; A0A0P5XGU4; A0A0P5ECS0; A0A0N8AKQ7; A0A0P5UT23; A0A0P5YRE9; A0A0P5NEQ8	0	1518.73	3.85	High	0	0.001255
	FALSE	High	IRGVIYGLEPGR		0.068333	0	6	67	1	A0A0P5Z193; E9HZI6; A0A0P4YK27; A0A0P5ECS0; A0A0N8AKQ7; A0A0P5J4J3	1	1329.76	2.33	High	0	0.05026
	FALSE	High	LPVEVVEAEPK		0.000783288	0	8	131	2	A0A0P5Z193; A0A0P5BM18; A0A0N8DZB7; A0A0P5I5B7; A0A0P5LYR5; A0A0P5ECS0; A0A0N8AKQ7; A0A0P5NG35	0	1209.67	3.23	High	0	0.000327
	FALSE	High	QREWSLYLDNASSETK		2.87507e-07	0	15	150	2	A0A0P5Z193; A0A0P5BM18; A0A0P5M269; A0A0P4YK27; A0A0P5GUJ5; A0A0P5I5B7; A0A0P5PPT4; A0A0P5PJQ0; A0A0P5XGU4; A0A0P6FTA8; A0A0P5ECS0; A0A0N8AKQ7; A0A0P5KLT7; A0A0P5UT23; A0A0P5YRE9	1	1926.92	5.66	High	0	4.445e-08
	FALSE	High	QREWSLYLDNASSETK	1xDeamidated [N10]	0.00402342	0	15	150	1	A0A0P5Z193; A0A0P5BM18; A0A0P5M269; A0A0P4YK27; A0A0P5GUJ5; A0A0P5I5B7; A0A0P5PPT4; A0A0P5PJQ0; A0A0P5XGU4; A0A0P6FTA8; A0A0P5ECS0; A0A0N8AKQ7; A0A0P5KLT7; A0A0P5UT23; A0A0P5YRE9	1	1927.9	3.59	High	0	0.002064
	FALSE	High	VNVNGMEISVTSESYTVK		3.20966e-06	0	8	124	1	A0A0P5BM18; A0A0P5M269; A0A0P5PPT4; A0A0P5XGU4; A0A0P5ECS0; A0A0N8AKQ7; A0A0P5YRE9; A0A0P5NEQ8	0	1956.96	3.79	High	0	6.725e-07
	FALSE	High	VNVNGMEISVTSESYTVK	1xDeamidated [N4]	4.57853e-07	0	8	124	1	A0A0P5BM18; A0A0P5M269; A0A0P5PPT4; A0A0P5XGU4; A0A0P5ECS0; A0A0N8AKQ7; A0A0P5YRE9; A0A0P5NEQ8	0	1957.94	3.67	High	0	7.503e-08
	FALSE	High	VNVNGMEISVTSESYTVK	1xOxidation [M6]	3.01596e-05	0	8	124	2	A0A0P5BM18; A0A0P5M269; A0A0P5PPT4; A0A0P5XGU4; A0A0P5ECS0; A0A0N8AKQ7; A0A0P5YRE9; A0A0P5NEQ8	0	1972.95	4.3	High	0	8.375e-06
	FALSE	High	VNVNGMEISVTSESYTVK	1xDeamidated [N4]; 1xOxidation [M6]	4.66922e-06	0	8	124	1	A0A0P5BM18; A0A0P5M269; A0A0P5PPT4; A0A0P5XGU4; A0A0P5ECS0; A0A0N8AKQ7; A0A0P5YRE9; A0A0P5NEQ8	0	1973.94	2.51	High	0	1.027e-06
	FALSE	High	NVNSPMIMEVEPEILKK	1xOxidation [M6]	5.21259e-05	0	11	99	2	E9HZI6; A0A0P5BM18; A0A0P5F867; A0A0P4YK27; A0A0P5PJQ0; A0A0P5ECS0; A0A0N8AKQ7; A0A0P5UT23; E9GVW7; A0A0P6EEN9; A0A0P5NEQ8	1	1987.02	4.21	High	0	1.553e-05
	FALSE	High	ALVTIEGMDISGK		0.00103639	0	1	52	1	A0A0N8AKQ7	0	1333.7	3.64	High	0	0.000448
	FALSE	High	ALVTIEGMDISGK	1xOxidation [M8]	0.00165022	0	1	52	1	A0A0N8AKQ7	0	1349.7	3.23	High	0	0.0007582
	FALSE	High	NAENEVLAVIKK		0.00104535	0	9	122	1	E9HZI6; A0A0P5BM18; A0A0P5M269; A0A0P5PPT4; A0A0P5XGU4; A0A0P5ECS0; A0A0N8AKQ7; A0A0P5YRE9; A0A0P5NEQ8	1	1327.76	3.67	High	0	0.0004518
	FALSE	High	NAENEVLAVIKK	1xDeamidated [N]	0.000899057	0	9	122	3	E9HZI6; A0A0P5BM18; A0A0P5M269; A0A0P5PPT4; A0A0P5XGU4; A0A0P5ECS0; A0A0N8AKQ7; A0A0P5YRE9; A0A0P5NEQ8	1	1328.74	3.66	High	0	0.0003829
	FALSE	High	IQTTWETLGDK		0.00864996	0	15	156	2	A0A0P5Z193; A0A0P5BM18; A0A0P4YK27; A0A0P5GUJ5; A0A0P5I5B7; A0A0P5PPT4; A0A0P5PJQ0; A0A0P5XGU4; A0A0P6FTA8; A0A0P5ECS0; A0A0N8AKQ7; A0A0P5KLT7; A0A0P5NG35; A0A0P5NEQ8; A0A0N8DYK4	0	1291.65	2.58	High	0	0.004898
	FALSE	High	TDVSLISSLVSLFEESPR		0.000293324	0	5	68	2	E9HZI6; A0A0P4YK27; A0A0P5ECS0; A0A0P4X0S3; A0A0N8AKQ7	0	1979.03	2.73	High	0	0.0001083
	FALSE	High	SILGHAIVIHQLPDDR		1.23332e-06	0	5	70	3	A0A0P5Z193; A0A0P4YK27; A0A0P5ECS0; A0A0P4X0S3; A0A0N8AKQ7	0	1783.98	5.59	High	0	2.294e-07
	FALSE	High	NVNSPMIMEVEPEILKK		2.95169e-05	0	11	99	1	E9HZI6; A0A0P5BM18; A0A0P5F867; A0A0P4YK27; A0A0P5PJQ0; A0A0P5ECS0; A0A0N8AKQ7; A0A0P5UT23; E9GVW7; A0A0P6EEN9; A0A0P5NEQ8	1	1971.03	3.71	High	0	8.154e-06
	FALSE	High	NVNSPMIMEVEPEILKK	2xOxidation [M6; M8]	0.000562166	0	11	99	2	E9HZI6; A0A0P5BM18; A0A0P5F867; A0A0P4YK27; A0A0P5PJQ0; A0A0P5ECS0; A0A0N8AKQ7; A0A0P5UT23; E9GVW7; A0A0P6EEN9; A0A0P5NEQ8	1	2003.02	4.46	High	0	0.0002463
	FALSE	High	ITVATTWTR		0.0397517	0	9	144	2	A0A0P5Z193; A0A0P5BM18; A0A0P5PPT4; A0A0P5XGU4; A0A0P5ECS0; A0A0N8AKQ7; A0A0P5KLT7; A0A0P5YRE9; A0A0P5NEQ8	0	1048.58	2.72	High	0	0.02732
	FALSE	High	ILPVFNYNSNQGLR		0.000517985	0	8	110	2	E9HZI6; A0A0P5BM18; A0A0N8DZB7; A0A0P4YK27; A0A0P5LYR5; A0A0P5ECS0; A0A0N8AKQ7; E9GVW7	0	1634.86	3.27	High	0	0.004836
	FALSE	High	ILPVFNYNSNQGLR	1xDeamidated [N6]	0.00189406	0	8	110	2	E9HZI6; A0A0P5BM18; A0A0N8DZB7; A0A0P4YK27; A0A0P5LYR5; A0A0P5ECS0; A0A0N8AKQ7; E9GVW7	0	1635.85	2.56	High	0	0.0008834
	FALSE	High	ILPVFNYNSNQGLR	2xDeamidated [N6; N8]	0.0136322	0	8	110	1	E9HZI6; A0A0P5BM18; A0A0N8DZB7; A0A0P4YK27; A0A0P5LYR5; A0A0P5ECS0; A0A0N8AKQ7; E9GVW7	0	1636.83	1.96	High	0	0.00815
	FALSE	High	VETVAIGKEEPLWIVNFKR		1.07193e-07	0	7	120	2	A0A0P5Z193; A0A0P5BM18; A0A0P4YK27; A0A0P5LYR5; A0A0P5ECS0; A0A0N8AKQ7; A0A0P5NG35	2	2228.24	5.87	High	0	1.464e-08
	FALSE	High	EEPLWIVNFKR		0.00737852	0	9	123	1	A0A0P5Z193; E9HZI6; A0A0P5BM18; A0A0P4YK27; A0A0P5LYR5; A0A0P5ECS0; A0A0N8AKQ7; A0A0P5NG35; E9GVW7	1	1430.78	2.3	High	0	0.004085
	FALSE	High	LVVKPFSYETEATEGLTVQHLTLR		5.89228e-06	0	5	89	1	A0A0P5Z193; A0A0P5BM18; A0A0N8DZB7; A0A0P5ECS0; A0A0N8AKQ7	0	2731.47	4.58	High	0	1.331e-06
	FALSE	High	KISDFTPAILLSETK		8.22611e-07	0	8	109	2	A0A0P5Z193; A0A0P5I0U9; A0A0P5BM18; A0A0P4YK27; A0A0P5PPT4; A0A0P6FTA8; A0A0P5ECS0; A0A0N8AKQ7	1	1662.93	4.65	High	0	1.453e-07
	FALSE	High	EKSETVFGISDVSPLLPK		4.4254e-05	0	11	125	2	A0A0P5BM18; A0A0P5M269; A0A0P5PPT4; A0A0P5XGU4; A0A0P5ECS0; A0A0N8AKQ7; A0A0P5UT23; A0A0P5YRE9; E9GVW7; A0A0P5NEQ8; A0A0P5L1A1	1	1946.05	3.16	High	0	0.00153
	FALSE	High	AIFALSTLAVQK		0.003613	0	12	127	2	A0A0P5Z193; A0A0P5BM18; A0A0P6FZL4; A0A0P4YK27; A0A0P5GUJ5; A0A0P5LYR5; A0A0P5XGU4; A0A0P6FTA8; A0A0P5ECS0; A0A0N8AKQ7; A0A0P5NEQ8; A0A0N8DYK4	0	1261.75	3.19	High	0	0.001831
	FALSE	High	AIFALSTLAVQK	1xDeamidated [Q11]	0.00546083	0	12	127	1	A0A0P5Z193; A0A0P5BM18; A0A0P6FZL4; A0A0P4YK27; A0A0P5GUJ5; A0A0P5LYR5; A0A0P5XGU4; A0A0P6FTA8; A0A0P5ECS0; A0A0N8AKQ7; A0A0P5NEQ8; A0A0N8DYK4	0	1262.74	2.41	High	0	0.002913
	FALSE	High	FVSGKVETVAIGKEEPLWIVNFK	1xDeamidated [N21]	0.0384285	0	7	119	1	A0A0P5Z193; A0A0P5BM18; A0A0P4YK27; A0A0P5LYR5; A0A0P5ECS0; A0A0N8AKQ7; A0A0P5NG35	2	2591.41	1.58	High	0	0.02627
	FALSE	High	IEQGILNGEQSWENVR	2xDeamidated [Q3; Q10]	0.0660939	0	5	66	1	A0A0P5Z193; A0A0P4YK27; A0A0P5ECS0; A0A0N8AKQ7; A0A0P5J4J3	0	1873.89	1.78	High	0	0.04854
	FALSE	High	NVNSPMIMEVEPEILK	1xOxidation [M]	0.00325839	0	11	99	2	E9HZI6; A0A0P5BM18; A0A0P5F867; A0A0P4YK27; A0A0P5PJQ0; A0A0P5ECS0; A0A0N8AKQ7; A0A0P5UT23; E9GVW7; A0A0P6EEN9; A0A0P5NEQ8	0	1858.93	3.37	High	0	0.00163
	FALSE	High	NVNSPMIMEVEPEILK	2xOxidation [M6; M8]	2.51675e-05	0	11	99	1	E9HZI6; A0A0P5BM18; A0A0P5F867; A0A0P4YK27; A0A0P5PJQ0; A0A0P5ECS0; A0A0N8AKQ7; A0A0P5UT23; E9GVW7; A0A0P6EEN9; A0A0P5NEQ8	0	1874.92	3.33	High	0	6.82e-06
	FALSE	High	NAENEVLAVIK	1xDeamidated [N]	0.00203792	0	9	122	2	E9HZI6; A0A0P5BM18; A0A0P5M269; A0A0P5PPT4; A0A0P5XGU4; A0A0P5ECS0; A0A0N8AKQ7; A0A0P5YRE9; A0A0P5NEQ8	0	1200.65	3.27	High	0	0.0009605
	FALSE	High	GIEIHPVAEVILPK		0.000513541	0	6	108	2	A0A0P5BM18; A0A0P5PPT4; A0A0P5XGU4; A0A0P5ECS0; A0A0N8AKQ7; A0A0P5YRE9	0	1514.89	3.18	High	0	0.0004855
	FALSE	High	IEQGILNGEQSWENVR		6.17824e-06	0	5	66	1	A0A0P5Z193; A0A0P4YK27; A0A0P5ECS0; A0A0N8AKQ7; A0A0P5J4J3	0	1871.92	3.85	High	0	1.407e-06
	FALSE	High	AKAIFALSTLAVQK		0.0317518	0	12	127	1	A0A0P5Z193; A0A0P5BM18; A0A0P6FZL4; A0A0P4YK27; A0A0P5GUJ5; A0A0P5LYR5; A0A0P5XGU4; A0A0P6FTA8; A0A0P5ECS0; A0A0N8AKQ7; A0A0P5NEQ8; A0A0N8DYK4	1	1460.88	2.09	High	0	0.02115
	FALSE	High	VPSNLNLEGVERPTNVDSLTLETAAPTRK		1.43129e-05	0	3	66	1	A0A0P4YK27; A0A0P5ECS0; A0A0N8AKQ7	1	3121.65	5.42	High	0	3.616e-06
	FALSE	High	VPSNLNLEGVERPTNVDSLTLETAAPTRK	1xDeamidated [N15]	1.46179e-07	0	3	66	1	A0A0P4YK27; A0A0P5ECS0; A0A0N8AKQ7	1	3122.63	4.49	High	0	2.085e-08
	FALSE	High	AIFALSTLAVQKK		9.08705e-05	0	12	127	1	A0A0P5Z193; A0A0P5BM18; A0A0P6FZL4; A0A0P4YK27; A0A0P5GUJ5; A0A0P5LYR5; A0A0P5XGU4; A0A0P6FTA8; A0A0P5ECS0; A0A0N8AKQ7; A0A0P5NEQ8; A0A0N8DYK4	1	1389.85	3.44	High	0	2.892e-05
	FALSE	High	AIFALSTLAVQKK	1xDeamidated [Q11]	0.000401727	0	12	127	2	A0A0P5Z193; A0A0P5BM18; A0A0P6FZL4; A0A0P4YK27; A0A0P5GUJ5; A0A0P5LYR5; A0A0P5XGU4; A0A0P6FTA8; A0A0P5ECS0; A0A0N8AKQ7; A0A0P5NEQ8; A0A0N8DYK4	1	1390.83	3.67	High	0	0.0001541
	FALSE	High	VPSNLNLEGVERPTNVDSLTLETAAPTR		1.67788e-07	0	3	66	2	A0A0P4YK27; A0A0P5ECS0; A0A0N8AKQ7	0	2993.55	5.71	High	0	2.428e-08
	FALSE	High	DLMDVAYELR		0.0185546	0	9	127	1	A0A0P5BM18; A0A0P5M269; A0A0P5PPT4; A0A0P5XGU4; A0A0P5ECS0; A0A0N8AKQ7; A0A0P5UT23; A0A0P5YRE9; A0A0P5NEQ8	0	1224.59	2.47	High	0	0.01156
	FALSE	High	ISSDVHIYQTLAYSYDDDYK		0.000351504	0	9	125	1	A0A0P5Z193; A0A0P5BM18; A0A0P5F867; A0A0N8DZB7; A0A0P5I5B7; A0A0P5LYR5; A0A0P5ECS0; A0A0N8AKQ7; A0A0P5NG35	0	2396.09	3.68	High	0	0.000133
	FALSE	High	EWSLYLDNASSETK		5.73083e-05	0	16	152	1	A0A0P5Z193; A0A0P5BM18; A0A0P5M269; A0A0P4YK27; A0A0P5GUJ5; A0A0P5I5B7; A0A0P5PPT4; A0A0P5PJQ0; A0A0P5XGU4; A0A0P6FTA8; A0A0P5ECS0; A0A0N8AKQ7; A0A0P5KLT7; A0A0P5UT23; A0A0P5YRE9; A0A0N8DYK4	0	1642.76	3.57	High	0	1.721e-05
	FALSE	High	EWSLYLDNASSETK	1xDeamidated [N8]	0.00133051	0	16	152	1	A0A0P5Z193; A0A0P5BM18; A0A0P5M269; A0A0P4YK27; A0A0P5GUJ5; A0A0P5I5B7; A0A0P5PPT4; A0A0P5PJQ0; A0A0P5XGU4; A0A0P6FTA8; A0A0P5ECS0; A0A0N8AKQ7; A0A0P5KLT7; A0A0P5UT23; A0A0P5YRE9; A0A0N8DYK4	0	1643.74	2.49	High	0	0.0005946
	FALSE	High	DLMDVAYELR	1xOxidation [M3]	0.0161111	0	9	127	1	A0A0P5BM18; A0A0P5M269; A0A0P5PPT4; A0A0P5XGU4; A0A0P5ECS0; A0A0N8AKQ7; A0A0P5UT23; A0A0P5YRE9; A0A0P5NEQ8	0	1240.59	3.03	High	0	0.009868
	FALSE	High	LLPAPELCQNFPVYEIVK	1xCarbamidomethyl [C8]	0.000149784	0	11	132	2	A0A0P5Z193; E9HZI6; A0A0P5BM18; A0A0N8DZB7; A0A0P4YK27; A0A0P5I5B7; A0A0P5LYR5; A0A0P5ECS0; A0A0N8AKQ7; A0A0P5NG35; E9GVW7	0	2130.13	3.57	High	0	5.079e-05
	FALSE	High	LCGLCGSQNGDK	2xCarbamidomethyl [C2; C5]	0.0014502	0	8	121	1	A0A0P5BM18; A0A0P5M269; A0A0P5PPT4; A0A0P5XGU4; A0A0P5ECS0; A0A0N8AKQ7; A0A0P5UT23; A0A0P5NEQ8	0	1308.57	2.4	High	0	0.0006534
	FALSE	High	LCGLCGSQNGDK	2xCarbamidomethyl [C2; C5]; 1xDeamidated [N9]	0.00150104	0	8	121	2	A0A0P5BM18; A0A0P5M269; A0A0P5PPT4; A0A0P5XGU4; A0A0P5ECS0; A0A0N8AKQ7; A0A0P5UT23; A0A0P5NEQ8	0	1309.55	2.68	High	0	0.0006812
	FALSE	High	IHEELKIEAR		0.00358203	0	19	168	2	E9HZI6; A0A0P5BM18; A0A0P5S327; A0A0P4YK27; A0A0P5GUJ5; A0A0P5I5B7; A0A0P5PPT4; A0A0P5PJQ0; A0A0P5XGU4; A0A0P6FTA8; A0A0P5ECS0; A0A0N8AKQ7; A0A0P5KLT7; A0A0P5UT23; A0A0P5NG35; E9GVW7; A0A0P6EEN9; A0A0P5NEQ8; A0A0N8DYK4	1	1237.69	3.92	High	0	0.00455
	FALSE	High	HSVVPFTTVRK		0.0297906	0	13	119	1	A0A0P5Z193; A0A0P5I0U9; A0A0P5BM18; A0A0P5GUJ5; A0A0P5PPT4; A0A0P5PJQ0; A0A0P5XGU4; A0A0P5ECS0; A0A0N8AKQ7; A0A0P5UT23; A0A0P5NEQ8; A0A0N8BQS0; A0A0N8DYK4	1	1270.73	3.18	High	0	0.01973
	FALSE	High	YSEVDPGQEVR		0.00347572	0	10	122	2	A0A0P5Z193; E9HZI6; A0A0P5BM18; A0A0N8DZB7; A0A0P4YK27; A0A0P5LYR5; A0A0P5ECS0; A0A0N8AKQ7; A0A0P5NG35; E9GVW7	0	1278.6	3.19	High	0	0.001754
	FALSE	High	RPSQWTVYR		0.0129487	0	9	121	1	E9HZI6; A0A0P5BM18; A0A0P5M269; A0A0P5XGU4; A0A0P5ECS0; A0A0N8AKQ7; A0A0P5UT23; A0A0P5YRE9; A0A0P5NEQ8	0	1192.62	2.63	High	0	0.007689
	FALSE	High	KYEQEQEDVVLSR		2.55441e-06	0	9	54	2	A0A0P5S327; A0A0P6FZL4; A0A0P5IAS3; A0A0P5GUJ5; A0A0P5LYR5; A0A0P5PJQ0; A0A0N8AKQ7; A0A0P6EEN9; A0A0P5NEQ8	1	1622.8	4.14	High	0	5.193e-07
	FALSE	High	CFSTESVPK	1xCarbamidomethyl [C1]	0.0514139	0	12	119	2	E9HZI6; A0A0P5BM18; A0A0P5M269; A0A0P5PPT4; A0A0P5XGU4; A0A0P5ECS0; A0A0N8AKQ7; A0A0P5UT23; A0A0P5YRE9; E9GVW7; A0A0P5NEQ8; A0A0P5L1A1	0	1054.49	2.58	High	0	0.03656
	FALSE	High	SETVFGISDVSPLLPK		0.000457151	0	11	125	1	A0A0P5BM18; A0A0P5M269; A0A0P5PPT4; A0A0P5XGU4; A0A0P5ECS0; A0A0N8AKQ7; A0A0P5UT23; A0A0P5YRE9; E9GVW7; A0A0P5NEQ8; A0A0P5L1A1	0	1688.91	3.32	High	0	0.0001781
	FALSE	High	QWAAALPGR		0.0566243	0	6	46	1	A0A0P5I5B7; A0A0P5PPT4; A0A0P5XGU4; A0A0N8AKQ7; A0A0P5KLT7; A0A0P5NG35	0	969.526	2.65	High	0	0.04066
	FALSE	High	RIGSSIVYGMDGK	1xOxidation [M10]	0.00503227	0	13	138	2	A0A0P5Z193; A0A0P5BM18; A0A0P4YK27; A0A0P5GUJ5; A0A0P5PPT4; A0A0P5PJQ0; A0A0P5XGU4; A0A0P5ECS0; A0A0N8AKQ7; A0A0P5KLT7; A0A0P5UT23; A0A0P5YRE9; A0A0P5NEQ8	1	1398.7	2.71	High	0.00329	0.126
	FALSE	High	QFNEDVMEK		0.0663698	0	9	97	1	A0A0P5Z193; E9HZI6; A0A0N8DZB7; A0A0P4YK27; A0A0P5LYR5; A0A0N8AKQ7; A0A0P5J4J3; A0A0P5NG35; E9GVW7	0	1139.5	1.97	High	0	0.04877
	FALSE	High	ELIKDETERR		0.0169603	0	6	64	1	A0A0P5GUJ5; A0A0P5PPT4; A0A0P5PJQ0; A0A0N8AKQ7; A0A0P5KLT7; A0A0P5NEQ8	2	1288.69	3.07	High	0	0.01046
	FALSE	High	DWFGTLAFAAMPSTIR	1xOxidation [M11]	0.000513541	0	10	114	2	A0A0P5Z193; A0A0P5BM18; A0A0P5GUJ5; A0A0P5PPT4; A0A0P5XGU4; A0A0P6FTA8; A0A0P5ECS0; A0A0N8AKQ7; A0A0P5UT23; A0A0P5NEQ8	0	1799.88	3.09	High	0	0.0002032
	FALSE	High	GKQFNEDVMEK		0.00416434	0	9	97	1	A0A0P5Z193; E9HZI6; A0A0N8DZB7; A0A0P4YK27; A0A0P5LYR5; A0A0N8AKQ7; A0A0P5J4J3; A0A0P5NG35; E9GVW7	1	1324.62	3.35	High	0	0.002148
	FALSE	High	ELLTSLMEFLK	1xOxidation [M7]	0.0208242	0	13	108	1	A0A0P5Z193; A0A0P5BM18; A0A0P4YK27; A0A0P5F3B7; A0A0P5RAR4; A0A0P5PJQ0; A0A0P6FTA8; A0A0P5ECS0; A0A0N8AKQ7; A0A0P5UT23; A0A0P6EEN9; A0A0P5NEQ8; A0A0N8DYK4	0	1339.72	2.72	High	0	0.01313
	FALSE	High	ELLTSLMEFLK		0.0618253	0	13	108	1	A0A0P5Z193; A0A0P5BM18; A0A0P4YK27; A0A0P5F3B7; A0A0P5RAR4; A0A0P5PJQ0; A0A0P6FTA8; A0A0P5ECS0; A0A0N8AKQ7; A0A0P5UT23; A0A0P6EEN9; A0A0P5NEQ8; A0A0N8DYK4	0	1323.72	1.64	High	0	0.04502
	FALSE	High	EIVGTLLMPIFFNK	1xOxidation [M8]	0.000105206	0	22	169	3	A0A0P5Z193; E9HZI6; A0A0P5BM18; A0A0P5S327; A0A0P6FZL4; A0A0P4YK27; A0A0P5IAS3; A0A0P5GUJ5; A0A0P5I5B7; A0A0P5LYR5; A0A0P5PJQ0; A0A0P5XGU4; A0A0P6FTA8; A0A0P5ECS0; A0A0N8AKQ7; A0A0P5KLT7; A0A0P5UT23; A0A0P5NG35; E9GVW7; A0A0P6EEN9; A0A0P5NEQ8; A0A0N8DYK4	0	1637.9	3.87	High	0	3.42e-05
	FALSE	High	EIVGTLLMPIFFNK		0.00626649	0	22	169	2	A0A0P5Z193; E9HZI6; A0A0P5BM18; A0A0P5S327; A0A0P6FZL4; A0A0P4YK27; A0A0P5IAS3; A0A0P5GUJ5; A0A0P5I5B7; A0A0P5LYR5; A0A0P5PJQ0; A0A0P5XGU4; A0A0P6FTA8; A0A0P5ECS0; A0A0N8AKQ7; A0A0P5KLT7; A0A0P5UT23; A0A0P5NG35; E9GVW7; A0A0P6EEN9; A0A0P5NEQ8; A0A0N8DYK4	0	1621.9	1.87	High	0	0.003393
	FALSE	High	LTIEPVDESTAVVALLATK		1.12664e-06	0	7	94	2	A0A0P5Z193; A0A0P4YK27; A0A0P5LYR5; A0A0P5ECS0; A0A0N8AKQ7; A0A0P5J4J3; A0A0P5NG35	0	1970.11	4.79	High	0	4.956e-06
	FALSE	High	LAALTLLFVSNPPQAFWSR		0.0037557	0	19	158	1	A0A0P5Z193; E9HZI6; A0A0P5BM18; A0A0P5S327; A0A0P6FZL4; A0A0P4YK27; A0A0P5GUJ5; A0A0P5I5B7; A0A0P5PJQ0; A0A0P5XGU4; A0A0P6FTA8; A0A0P5ECS0; A0A0N8AKQ7; A0A0P5KLT7; A0A0P5UT23; A0A0P5NG35; E9GVW7; A0A0P6EEN9; A0A0P5NEQ8	0	2131.17	2.48	High	0	0.001914
	FALSE	High	ATGQPELYIYLNFLDNYQR		7.26318e-05	0	21	168	1	A0A0P5Z193; E9HZI6; A0A0P5XPE2; A0A0P5BM18; A0A0P5S327; A0A0P4YK27; A0A0P5IAS3; A0A0P5GUJ5; A0A0P5I5B7; A0A0P5PPT4; A0A0P5PJQ0; A0A0P5XGU4; A0A0P5ECS0; A0A0N8AKQ7; A0A0P5KLT7; A0A0P5UT23; A0A0P5NG35; E9GVW7; A0A0P6EEN9; A0A0P5NEQ8; A0A0N8DYK4	0	2318.15	2.83	High	0	2.246e-05
	FALSE	High	LQEECLKEK	1xCarbamidomethyl [C5]	0.0554498	0	12	131	4	E9HZI6; A0A0P5BM18; A0A0P5M269; A0A0P5PPT4; A0A0P5XGU4; A0A0P5ECS0; A0A0N8AKQ7; A0A0P5UT23; A0A0P5YRE9; E9GVW7; A0A0P5NEQ8; A0A0P5L1A1	1	1176.59	2.03	High	0.00329	0.0946
	FALSE	High	HPHYGAIEGQK		0.0238722	0	3	61	1	A0A0P4YK27; A0A0P5ECS0; A0A0N8AKQ7	0	1236.61	2.3	High	0	0.01534
	FALSE	High	KELIKDETER		0.0149799	0	6	65	1	A0A0P5GUJ5; A0A0P5PPT4; A0A0P5PJQ0; A0A0N8AKQ7; A0A0P5KLT7; A0A0P5NEQ8	2	1260.68	2.7	High	0	0.009078
	FALSE	High	LLSEIISDVESEAYYVDPSTK		3.49175e-05	0	6	88	6	A0A0P5Z193; A0A0P5BM18; A0A0P5PJQ0; A0A0P5ECS0; A0A0N8AKQ7; A0A0P5NEQ8	0	2358.16	3.86	High	0	9.862e-06
	FALSE	High	GMSDECVAAR	1xCarbamidomethyl [C6]	0.0568621	0	4	62	1	A0A0P5FBG0; A0A0P5PPT4; A0A0N8AKQ7; A0A0P5KLT7	0	1095.46	2.57	High	0	0.04093
	FALSE	High	GMSDECVAAR	1xCarbamidomethyl [C6]; 1xOxidation [M2]	0.00725275	0	4	62	3	A0A0P5FBG0; A0A0P5PPT4; A0A0N8AKQ7; A0A0P5KLT7	0	1111.45	2.03	High	0	0.01644
	FALSE	High	LVMGEFCNPSDSIVASQLVPYLAEQAK	1xCarbamidomethyl [C7]; 1xOxidation [M3]	4.74122e-05	0	13	136	1	E9HZI6; A0A0P5BM18; A0A0P5I5B7; A0A0P5RAR4; A0A0P5PJQ0; A0A0P6FTA8; A0A0P5ECS0; A0A0N8AKQ7; A0A0P5KLT7; A0A0P5UT23; A0A0P5NG35; A0A0P6EEN9; A0A0P5NEQ8	0	2982.46	4.82	High	0	1.393e-05
	FALSE	High	GRLCGLCGSQNGDK	2xCarbamidomethyl [C4; C7]; 1xDeamidated [N11]	0.0394168	0	8	119	1	A0A0P5BM18; A0A0P5M269; A0A0P5PPT4; A0A0P5XGU4; A0A0P5ECS0; A0A0N8AKQ7; A0A0P5UT23; A0A0P5NEQ8	1	1522.67	2.71	High	0	0.027
	FALSE	High	CNLVNGAGCENK	2xCarbamidomethyl [C1; C9]	0.000721732	0	9	126	2	E9HZI6; A0A0P5BM18; A0A0N8DZB7; A0A0P5I5B7; A0A0P5LYR5; A0A0P5ECS0; A0A0N8AKQ7; A0A0P5NG35; E9GVW7	0	1335.58	3.23	High	0	0.000299
	FALSE	High	CNLVNGAGCENK	2xCarbamidomethyl [C1; C9]; 1xDeamidated [N5]	0.0153042	0	9	126	1	E9HZI6; A0A0P5BM18; A0A0N8DZB7; A0A0P5I5B7; A0A0P5LYR5; A0A0P5ECS0; A0A0N8AKQ7; A0A0P5NG35; E9GVW7	0	1336.56	1.83	High	0	0.009289
	FALSE	High	GRLCGLCGSQNGDK	2xCarbamidomethyl [C4; C7]	0.0202972	0	8	119	1	A0A0P5BM18; A0A0P5M269; A0A0P5PPT4; A0A0P5XGU4; A0A0P5ECS0; A0A0N8AKQ7; A0A0P5UT23; A0A0P5NEQ8	1	1521.69	2.46	High	0	0.0128
	FALSE	High	VANKNPLNREETVR		0.00482037	0	18	159	2	A0A0P5BM18; A0A0P5S327; A0A0P6FZL4; A0A0P4YK27; A0A0P5IAS3; A0A0P5GUJ5; A0A0P5I5B7; A0A0P5PJQ0; A0A0P5XGU4; A0A0P6FTA8; A0A0P5ECS0; A0A0N8AKQ7; A0A0P5KLT7; A0A0P5UT23; A0A0P5NG35; A0A0P6EEN9; A0A0P5NEQ8; A0A0N8DYK4	2	1639.89	2.96	High	0	0.002533
	FALSE	High	VANKNPLNREETVR	1xDeamidated [N]	0.0275941	0	18	159	2	A0A0P5BM18; A0A0P5S327; A0A0P6FZL4; A0A0P4YK27; A0A0P5IAS3; A0A0P5GUJ5; A0A0P5I5B7; A0A0P5PJQ0; A0A0P5XGU4; A0A0P6FTA8; A0A0P5ECS0; A0A0N8AKQ7; A0A0P5KLT7; A0A0P5UT23; A0A0P5NG35; A0A0P6EEN9; A0A0P5NEQ8; A0A0N8DYK4	2	1640.87	2.08	High	0	0.01806
	FALSE	High	ELIKDETER		0.0536195	0	6	65	1	A0A0P5GUJ5; A0A0P5PPT4; A0A0P5PJQ0; A0A0N8AKQ7; A0A0P5KLT7; A0A0P5NEQ8	1	1132.58	1.9	High	0	0.03824
	FALSE	High	EKIEIFPAQQK		0.0100529	0	10	136	1	E9HZI6; A0A0P5BM18; A0A0P5M269; A0A0P5PPT4; A0A0P5XGU4; A0A0P5ECS0; A0A0N8AKQ7; A0A0P5UT23; A0A0P5YRE9; A0A0P5NEQ8	1	1330.74	2.7	High	0	0.005796
	FALSE	High	RALVTIEGMDISGK		0.000316976	0	1	52	1	A0A0N8AKQ7	1	1489.8	3.85	High	0	0.0001183
	FALSE	High	RALVTIEGMDISGK	1xOxidation [M9]	0.000166818	0	1	52	2	A0A0N8AKQ7	1	1505.8	3.84	High	0	5.746e-05
	FALSE	High	IIDQEHLEKPFQVK		2.09114e-05	0	9	122	4	E9HZI6; A0A0P5BM18; A0A0N8DZB7; A0A0P4YK27; A0A0P5LYR5; A0A0P5ECS0; A0A0N8AKQ7; A0A0P5NG35; E9GVW7	0	1723.94	3.97	High	0	5.542e-06
	FALSE	High	HGLHVHAGTTLGDQCDSVGGQFVPAEK	1xCarbamidomethyl [C15]	6.75715e-10	0	5	65	1	A0A0P5Z193; A0A0P4YK27; A0A0P5ECS0; A0A0N8AKQ7; A0A0P5J4J3	0	2817.34	7.38	High	0	4.899e-11
	FALSE	High	HGLHVHAGTTLGDQCDSVGGQFVPAEK	1xCarbamidomethyl [C15]; 1xDeamidated [Q14]	4.56994e-11	0	5	65	1	A0A0P5Z193; A0A0P4YK27; A0A0P5ECS0; A0A0N8AKQ7; A0A0P5J4J3	0	2818.32	5.93	High	0	2.36472e-12
	FALSE	High	LNEEMSSRPLDELMGK		0.00155366	0	5	54	1	A0A0P5BM18; A0A0P5M269; A0A0P5PPT4; A0A0N8AKQ7; A0A0P5NEQ8	0	1848.88	3.72	High	0	0.0007073
	FALSE	High	LNEEMSSRPLDELMGK	1xOxidation [M14]	0.00839371	0	5	54	2	A0A0P5BM18; A0A0P5M269; A0A0P5PPT4; A0A0N8AKQ7; A0A0P5NEQ8	0	1864.88	3.22	High	0	0.004721
	FALSE	High	LNEEMSSRPLDELMGK	2xOxidation [M5; M14]	0.000103855	0	5	54	2	A0A0P5BM18; A0A0P5M269; A0A0P5PPT4; A0A0N8AKQ7; A0A0P5NEQ8	0	1880.87	4.2	High	0	0.001311
	FALSE	High	HSVVPFTTVR		0.0110959	0	13	120	1	A0A0P5Z193; A0A0P5I0U9; A0A0P5BM18; A0A0P5GUJ5; A0A0P5PPT4; A0A0P5PJQ0; A0A0P5XGU4; A0A0P5ECS0; A0A0N8AKQ7; A0A0P5UT23; A0A0P5NEQ8; A0A0N8BQS0; A0A0N8DYK4	0	1142.63	2.74	High	0	0.006459
	FALSE	High	GKQFNEDVMEKYSEVDPGQEVR	1xOxidation [M9]	0.00273117	0	8	94	1	A0A0P5Z193; E9HZI6; A0A0N8DZB7; A0A0P4YK27; A0A0P5LYR5; A0A0N8AKQ7; A0A0P5NG35; E9GVW7	2	2600.19	3.06	High	0	0.001334
	FALSE	High	KIVTVLLNK		0.0132861	0	9	142	1	A0A0P5BM18; A0A0P5M269; A0A0P5PPT4; A0A0P5XGU4; A0A0P5ECS0; A0A0N8AKQ7; A0A0P5UT23; A0A0P5YRE9; A0A0P5NEQ8	1	1027.69	3.37	High	0	0.007914
	FALSE	High	IIGCTSNEGHFIVQR	1xCarbamidomethyl [C4]	1.19668e-06	0	9	122	2	A0A0P5Z193; A0A0P5BM18; A0A0N8DZB7; A0A0P4YK27; A0A0P5I5B7; A0A0P5LYR5; A0A0P5ECS0; A0A0N8AKQ7; A0A0P5NG35	0	1730.86	4.84	High	0	2.218e-07
	FALSE	High	GRLCGLCGSQNGDKVTDLTGPR	2xCarbamidomethyl [C4; C7]; 1xDeamidated [N/Q]	2.08925e-09	0	7	106	4	A0A0P5BM18; A0A0P5M269; A0A0P5PPT4; A0A0P5XGU4; A0A0P5ECS0; A0A0N8AKQ7; A0A0P5UT23	2	2362.12	6.69	High	0	1.945e-07
	FALSE	High	SLFDTIYGEQIMSQEYVR	1xOxidation [M12]	6.41011e-05	0	10	94	1	A0A0P5I0U9; A0A0P5BM18; A0A0P4YK27; A0A0P5GUJ5; A0A0P5PPT4; A0A0P5PJQ0; A0A0P5ECS0; A0A0N8AKQ7; A0A0P5NEQ8; A0A0N8DYK4	0	2195.03	2.86	High	0	1.952e-05
	FALSE	High	AESEDWEDEALCNLVR	1xCarbamidomethyl [C12]	1.02918e-06	0	16	156	1	A0A0P5Z193; A0A0P5BM18; A0A0P4YK27; A0A0P5IAS3; A0A0P5I5B7; A0A0P5LYR5; A0A0P5PJQ0; A0A0P5XGU4; A0A0P6FTA8; A0A0P5ECS0; A0A0N8AKQ7; A0A0P5KLT7; A0A0P5UT23; A0A0P5NG35; A0A0P5NEQ8; A0A0N8DYK4	0	1935.84	4.34	High	0	1.871e-07
	FALSE	High	EVVVLASPIHR		0.0022308	0	7	76	3	E9HZI6; A0A0P5M269; A0A0P5PPT4; A0A0N8AKQ7; A0A0P5YRE9; E9GVW7; A0A0P5NEQ8	0	1219.72	3.72	High	0	0.001065
	FALSE	High	QFNEDVMEKYSEVDPGQEVR	1xOxidation [M7]	0.00975524	0	8	94	1	A0A0P5Z193; E9HZI6; A0A0N8DZB7; A0A0P4YK27; A0A0P5LYR5; A0A0N8AKQ7; A0A0P5NG35; E9GVW7	1	2415.08	3.04	High	0	0.005604
	FALSE	High	LAVVQPSVYSK		0.00621283	0	14	125	2	A0A0P5Z193; A0A0P5I0U9; A0A0P5BM18; A0A0P4YK27; A0A0P5GUJ5; A0A0P5PPT4; A0A0P5PJQ0; A0A0P5XGU4; A0A0P6FTA8; A0A0P5ECS0; A0A0N8AKQ7; A0A0P5NEQ8; A0A0N8BQS0; A0A0N8DYK4	0	1190.68	3.16	High	0	0.003369
	FALSE	High	HGLHVHAGTTLGDQCDSVGGQFVPAEKYESER	1xCarbamidomethyl [C15]; 1xDeamidated [Q]	2.74603e-10	0	5	65	3	A0A0P5Z193; A0A0P4YK27; A0A0P5ECS0; A0A0N8AKQ7; A0A0P5J4J3	1	3482.6	7.06	High	0	2.631e-08
	FALSE	High	LCGLCGSQNGDKVTDLTGPR	2xCarbamidomethyl [C2; C5]	1.06274e-07	0	7	108	2	A0A0P5BM18; A0A0P5M269; A0A0P5PPT4; A0A0P5XGU4; A0A0P5ECS0; A0A0N8AKQ7; A0A0P5UT23	1	2148.02	4.89	High	0	6.056e-07
	FALSE	High	LCGLCGSQNGDKVTDLTGPR	2xCarbamidomethyl [C2; C5]; 1xDeamidated [N9]	8.15183e-09	0	7	108	4	A0A0P5BM18; A0A0P5M269; A0A0P5PPT4; A0A0P5XGU4; A0A0P5ECS0; A0A0N8AKQ7; A0A0P5UT23	1	2149	6.14	High	0	8.091e-10
	FALSE	High	ISDFTPAILLSETK		4.4637e-05	0	8	109	1	A0A0P5Z193; A0A0P5I0U9; A0A0P5BM18; A0A0P4YK27; A0A0P5PPT4; A0A0P6FTA8; A0A0P5ECS0; A0A0N8AKQ7	0	1534.84	4.06	High	0	1.303e-05
	FALSE	High	IGSSIVYGMDGK	1xOxidation [M9]	0.00385394	0	13	138	1	A0A0P5Z193; A0A0P5BM18; A0A0P4YK27; A0A0P5GUJ5; A0A0P5PPT4; A0A0P5PJQ0; A0A0P5XGU4; A0A0P5ECS0; A0A0N8AKQ7; A0A0P5KLT7; A0A0P5UT23; A0A0P5YRE9; A0A0P5NEQ8	0	1242.6	3.29	High	0	0.001964
	FALSE	High	AVMTIKYNEMPAVVR	2xOxidation [M3; M10]	0.0313497	0	11	151	1	A0A0P5Z193; A0A0P5BM18; A0A0P5M269; A0A0P5PPT4; A0A0P5XGU4; A0A0P5ECS0; A0A0N8AKQ7; A0A0P5KLT7; A0A0P5UT23; A0A0P5YRE9; A0A0P5NEQ8	1	1753.9	2.67	High	0	0.02089
	FALSE	High	IVTVLLNKEK		0.062344	0	9	139	1	A0A0P5BM18; A0A0P5M269; A0A0P5PPT4; A0A0P5XGU4; A0A0P5ECS0; A0A0N8AKQ7; A0A0P5UT23; A0A0P5YRE9; A0A0P5NEQ8	1	1156.73	2.18	High	0	0.04544
	FALSE	High	FVSGKVETVAIGK		0.0533949	0	8	126	1	A0A0P5Z193; A0A0P5BM18; A0A0N8DZB7; A0A0P4YK27; A0A0P5LYR5; A0A0P5ECS0; A0A0N8AKQ7; A0A0P5NG35	1	1334.77	1.9	High	0	0.03817
	FALSE	High	FFTINPNTIFR		0.00643025	0	19	164	3	A0A0P5XPE2; A0A0P5BM18; A0A0P5S327; A0A0P4YK27; A0A0P5IAS3; A0A0P5I5B7; A0A0P5PPT4; A0A0P5PJQ0; A0A0P5XGU4; A0A0P6FTA8; A0A0P5ECS0; A0A0N8AKQ7; A0A0P5R4V4; A0A0P5KLT7; A0A0P5UT23; A0A0P5NG35; A0A0P6EEN9; A0A0P5NEQ8; A0A0N8DYK4	0	1369.73	2.68	High	0	0.004597
	FALSE	High	IEGALKPVVVSK		0.000210513	0	13	162	6	A0A0P5XPE2; A0A0P5BM18; A0A0P5I5B7; A0A0P5PPT4; A0A0P5XGU4; A0A0P6FTA8; A0A0P5ECS0; A0A0N8AKQ7; A0A0P5KLT7; A0A0P5NG35; A0A0P5NEQ8; A0A0N8BQS0; A0A0N8DYK4	0	1239.77	3.92	High	0	7.445e-05
	FALSE	High	LMMEQASISSPVK		0.00243143	0	2	61	1	A0A0P5ECS0; A0A0N8AKQ7	0	1420.72	3.47	High	0	0.001172
	FALSE	High	LMMEQASISSPVK	1xOxidation [M]	0.0041823	0	2	61	2	A0A0P5ECS0; A0A0N8AKQ7	0	1436.71	2.68	High	0	0.002159
	FALSE	High	LMMEQASISSPVK	2xOxidation [M2; M3]	0.00119984	0	2	61	1	A0A0P5ECS0; A0A0N8AKQ7	0	1452.71	2.98	High	0	0.0005296
	FALSE	High	SEEDISPSLR		0.0253406	0	9	129	1	A0A0P5Z193; A0A0P5BM18; A0A0P5PPT4; A0A0P5XGU4; A0A0P5ECS0; A0A0N8AKQ7; A0A0P5KLT7; A0A0P5YRE9; A0A0P5NEQ8	0	1132.55	2.73	High	0	0.01641
	FALSE	High	YEQEQEDVVLSR		0.00140713	0	9	54	1	A0A0P5S327; A0A0P6FZL4; A0A0P5IAS3; A0A0P5GUJ5; A0A0P5LYR5; A0A0P5PJQ0; A0A0N8AKQ7; A0A0P6EEN9; A0A0P5NEQ8	0	1494.71	2.98	High	0	0.0006324
	FALSE	High	EEPLWIVNFK		0.0103152	0	9	124	1	A0A0P5Z193; E9HZI6; A0A0P5BM18; A0A0P4YK27; A0A0P5LYR5; A0A0P5ECS0; A0A0N8AKQ7; A0A0P5NG35; E9GVW7	0	1274.68	2.1	High	0	0.005951
	FALSE	High	LMEISIDSK		0.0556828	0	17	161	1	A0A0P5Z193; A0A0P5XPE2; A0A0P5BM18; A0A0P5S327; A0A0P5GUJ5; A0A0P5I5B7; A0A0P5PPT4; A0A0P5PJQ0; A0A0P5XGU4; A0A0P6FTA8; A0A0P5ECS0; A0A0N8AKQ7; A0A0P5KLT7; A0A0P5UT23; A0A0P5NG35; A0A0P6EEN9; A0A0P5NEQ8	0	1035.54	2.39	High	0	0.03997
	FALSE	High	LMEISIDSK	1xOxidation [M2]	0.0476639	0	17	161	1	A0A0P5Z193; A0A0P5XPE2; A0A0P5BM18; A0A0P5S327; A0A0P5GUJ5; A0A0P5I5B7; A0A0P5PPT4; A0A0P5PJQ0; A0A0P5XGU4; A0A0P6FTA8; A0A0P5ECS0; A0A0N8AKQ7; A0A0P5KLT7; A0A0P5UT23; A0A0P5NG35; A0A0P6EEN9; A0A0P5NEQ8	0	1051.53	2.43	High	0	0.03344
	FALSE	High	YNEMPAVVR		0.0851047	0.000973478	11	152	1	A0A0P5Z193; A0A0P5BM18; A0A0P5M269; A0A0P5PPT4; A0A0P5XGU4; A0A0P5ECS0; A0A0N8AKQ7; A0A0P5KLT7; A0A0P5UT23; A0A0P5YRE9; A0A0P5NEQ8	0	1078.53	2.45	High	0.0007147	0.06469
	FALSE	High	RCFSTESVPK	1xCarbamidomethyl [C2]	0.080995	0.000973478	12	119	1	E9HZI6; A0A0P5BM18; A0A0P5M269; A0A0P5PPT4; A0A0P5XGU4; A0A0P5ECS0; A0A0N8AKQ7; A0A0P5UT23; A0A0P5YRE9; E9GVW7; A0A0P5NEQ8; A0A0P5L1A1	1	1210.59	2.99	High	0.0007147	0.06121
	FALSE	High	KIEQGILNGEQSWENVR		0.0706447	0.000973478	5	65	1	A0A0P5Z193; A0A0P4YK27; A0A0P5ECS0; A0A0N8AKQ7; A0A0P5J4J3	1	2000.02	1.18	High	0.0007147	0.05234
	FALSE	High	ITTALSLSR		0.0858086	0.000973478	17	144	1	A0A0P5Z193; E9HZI6; A0A0P5BM18; A0A0P5F867; A0A0P5S327; A0A0P4YK27; A0A0P5I5B7; A0A0P5LYR5; A0A0P5PJQ0; A0A0P5ECS0; A0A0N8AKQ7; A0A0P5KLT7; A0A0P5NG35; E9GVW7; A0A0P6EEN9; A0A0P5NEQ8; A0A0N8DYK4	0	961.568	2.48	High	0.0007147	0.06514
	FALSE	High	YNEMPAVVR	1xOxidation [M4]	0.0721274	0.000973478	11	152	1	A0A0P5Z193; A0A0P5BM18; A0A0P5M269; A0A0P5PPT4; A0A0P5XGU4; A0A0P5ECS0; A0A0N8AKQ7; A0A0P5KLT7; A0A0P5UT23; A0A0P5YRE9; A0A0P5NEQ8	0	1094.53	2.47	High	0.0007147	0.05362
	FALSE	High	KITVATTWTR		0.0751824	0.000973478	9	142	2	A0A0P5Z193; A0A0P5BM18; A0A0P5PPT4; A0A0P5XGU4; A0A0P5ECS0; A0A0N8AKQ7; A0A0P5KLT7; A0A0P5YRE9; A0A0P5NEQ8	1	1176.67	3.33	High	0.008045	0.1851
	FALSE	High	SVGYLGNIK		0.114654	0.0018991	6	70	2	A0A0P5Z193; A0A0P4YK27; A0A0P5ECS0; A0A0P4X0S3; A0A0N8AKQ7; A0A0P5J4J3	0	950.531	2.05	High	0.001394	0.09067
	FALSE	High	QQDSQWESQK		0.115584	0.00283597	17	158	1	A0A0P5I0U9; E9HZI6; A0A0P5BM18; A0A0P5M269; A0A0P4YK27; A0A0P5GUJ5; A0A0P5I5B7; A0A0P5PPT4; A0A0P5PJQ0; A0A0P5XGU4; A0A0P5ECS0; A0A0N8AKQ7; A0A0P5KLT7; A0A0P5UT23; A0A0P5YRE9; E9GVW7; A0A0P5NEQ8	0	1263.56	1.69	High	0.002777	0.09138
	FALSE	High	VETVAIGK		0.135175	0.00358207	8	127	1	A0A0P5Z193; A0A0P5BM18; A0A0N8DZB7; A0A0P4YK27; A0A0P5LYR5; A0A0P5ECS0; A0A0N8AKQ7; A0A0P5NG35	0	816.483	2	High	0.00329	0.1092
	FALSE	High	FAIEGDMK		0.149869	0.00358207	16	149	2	A0A0P5Z193; A0A0P5XPE2; A0A0P5BM18; A0A0P4YK27; A0A0P5GUJ5; A0A0P5I5B7; A0A0P5PPT4; A0A0P6FTA8; A0A0P5ECS0; A0A0N8AKQ7; A0A0P5KLT7; A0A0P5UT23; A0A0P5NG35; A0A0P5NEQ8; A0A0N8BQS0; A0A0N8DYK4	0	910.434	2.01	High	0.00329	0.1224
	FALSE	High	QFNEDVMEK	1xOxidation [M7]	0.120342	0.00358207	9	97	1	A0A0P5Z193; E9HZI6; A0A0N8DZB7; A0A0P4YK27; A0A0P5LYR5; A0A0N8AKQ7; A0A0P5J4J3; A0A0P5NG35; E9GVW7	0	1155.5	2.41	High	0.00329	0.09584
	FALSE	High	LGFHCLPK	1xCarbamidomethyl [C5]	0.131449	0.00358207	12	122	1	E9HZI6; A0A0P5BM18; A0A0P5M269; A0A0P5PPT4; A0A0P5XGU4; A0A0P5ECS0; A0A0N8AKQ7; A0A0P5UT23; A0A0P5YRE9; E9GVW7; A0A0P5NEQ8; A0A0P5L1A1	0	971.513	2.23	High	0.00329	0.1058
	FALSE	High	ENAGKLDINFHK		0.121804	0.00358207	8	53	1	A0A0P5IAS3; A0A0P5I5B7; A0A0P5PPT4; A0A0P5XGU4; A0A0N8AKQ7; A0A0P5R4V4; A0A0P5KLT7; A0A0P5NG35	1	1385.72	2.02	High	0.00329	0.097
	FALSE	High	GKQFNEDVMEK	1xOxidation [M9]	0.122295	0.00358207	9	97	1	A0A0P5Z193; E9HZI6; A0A0N8DZB7; A0A0P4YK27; A0A0P5LYR5; A0A0N8AKQ7; A0A0P5J4J3; A0A0P5NG35; E9GVW7	1	1340.62	1.94	High	0.00329	0.09723
	FALSE	High	LMAETPFTR	1xOxidation [M2]	0.125783	0.00358207	6	50	1	A0A0P5I5B7; A0A0P5PPT4; A0A0P5XGU4; A0A0N8AKQ7; A0A0P5KLT7; A0A0P5NG35	0	1081.53	2.12	High	0.00329	0.1008
	FALSE	High	GIEIHPVAEVILPKR		0.146356	0.00358207	6	108	1	A0A0P5BM18; A0A0P5PPT4; A0A0P5XGU4; A0A0P5ECS0; A0A0N8AKQ7; A0A0P5YRE9	1	1671	1.8	High	0.00329	0.1196
	FALSE	High	IVTVLLNK		0.152253	0.00358207	9	145	2	A0A0P5BM18; A0A0P5M269; A0A0P5PPT4; A0A0P5XGU4; A0A0P5ECS0; A0A0N8AKQ7; A0A0P5UT23; A0A0P5YRE9; A0A0P5NEQ8	0	899.592	2.75	High	0.00329	0.1251
	FALSE	High	SATPTGYSK		0.141787	0.00358207	11	127	1	A0A0P5Z193; E9HZI6; A0A0P5BM18; A0A0P5F867; A0A0N8DZB7; A0A0P5I5B7; A0A0P5LYR5; A0A0P5ECS0; A0A0N8AKQ7; A0A0P5NG35; E9GVW7	0	911.447	1.56	High	0.00329	0.1154
	FALSE	High	EIVGTLLMPIFFNKAEETEVR	1xOxidation [M8]	0.162767	0.00527855	21	163	1	A0A0P5Z193; E9HZI6; A0A0P5BM18; A0A0P6FZL4; A0A0P4YK27; A0A0P5IAS3; A0A0P5GUJ5; A0A0P5I5B7; A0A0P5LYR5; A0A0P5PJQ0; A0A0P5XGU4; A0A0P6FTA8; A0A0P5ECS0; A0A0N8AKQ7; A0A0P5KLT7; A0A0P5UT23; A0A0P5NG35; E9GVW7; A0A0P6EEN9; A0A0P5NEQ8; A0A0N8DYK4	1	2452.28	1.46	High	0.004515	0.1346
	FALSE	High	LVGKPGLR		0.185741	0.00607653	19	162	1	A0A0P5Z193; E9HZI6; A0A0P5BM18; A0A0P5S327; A0A0P5GUJ5; A0A0P5I5B7; A0A0P5PPT4; A0A0P5PJQ0; A0A0P5XGU4; A0A0P6FTA8; A0A0P5ECS0; A0A0N8AKQ7; A0A0P5KLT7; A0A0P5UT23; A0A0P5NG35; E9GVW7; A0A0P6EEN9; A0A0P5NEQ8; A0A0N8DYK4	0	839.546	1.78	High	0.005091	0.1564
	FALSE	High	ISHSDTVR		0.202835	0.00767163	9	128	1	A0A0P5Z193; A0A0P5BM18; A0A0N8DZB7; A0A0P4YK27; A0A0P5I5B7; A0A0P5LYR5; A0A0P5ECS0; A0A0N8AKQ7; A0A0P5NG35	0	914.469	1.1	High	0.006261	0.1731
	FALSE	High	VTDLTGPR		0.19825	0.00767163	10	120	1	E9HZI6; A0A0P5BM18; A0A0P5M269; A0A0P5PPT4; A0A0P5XGU4; A0A0P5ECS0; A0A0N8AKQ7; A0A0P5UT23; A0A0P5YRE9; E9GVW7	0	858.468	2.15	High	0.006261	0.1686
FALSE	High	Master Protein	A0A0P5BM18	Copper-zinc cu-zn superoxide dismutase OS=Daphnia magna PE=4 SV=1	0	597.209	53.7486	104	204	1	1	1734	195.6	7.34	617.68	104
	Checked	Confidence	Sequence	Modifications	Qvality PEP	Qvality q-value	# Protein Groups	# Proteins	# PSMs	Master Protein Accessions	# Missed Cleavages	Theo. MH+ [Da]	XCorr Sequest HT	Confidence Sequest HT	Percolator q-Value Sequest HT	Percolator PEP Sequest HT
	FALSE	High	LMVETPFSR		0.0294129	0	10	125	1	A0A0P5Z193; A0A0P5XPE2; A0A0P5BM18; A0A0P4YK27; A0A0P5GUJ5; A0A0P6FTA8; A0A0P5ECS0; A0A0P5UT23; A0A0P5NEQ8; A0A0N8DYK4	0	1079.56	2.44	High	0	0.01941
	FALSE	High	HLGMDFVFVER	1xOxidation [M4]	0.000872352	0	12	112	2	A0A0P5I0U9; A0A0P5BM18; A0A0P4YK27; A0A0P5GUJ5; A0A0P5PPT4; A0A0P5PJQ0; A0A0P5XGU4; A0A0P5ECS0; A0A0N8AKQ7; A0A0P5UT23; A0A0P5NEQ8; A0A0N8DYK4	0	1365.66	3.36	High	0	0.01263
	FALSE	High	HLGMDFVFVER		0.000610115	0	12	112	1	A0A0P5I0U9; A0A0P5BM18; A0A0P4YK27; A0A0P5GUJ5; A0A0P5PPT4; A0A0P5PJQ0; A0A0P5XGU4; A0A0P5ECS0; A0A0N8AKQ7; A0A0P5UT23; A0A0P5NEQ8; A0A0N8DYK4	0	1349.67	2.91	High	0	0.0002464
	FALSE	High	VETVAIGKEEPLWIVNFK		1.6249e-06	0	7	120	2	A0A0P5Z193; A0A0P5BM18; A0A0P4YK27; A0A0P5LYR5; A0A0P5ECS0; A0A0N8AKQ7; A0A0P5NG35	1	2072.14	6.5	High	0	3.134e-07
	FALSE	High	DESSIISPELEK		0.00455817	0	18	150	1	A0A0P5Z193; E9HZI6; A0A0P5XPE2; A0A0P5BM18; A0A0P5S327; A0A0P4YK27; A0A0P5IAS3; A0A0P5GUJ5; A0A0P5I5B7; A0A0P5PJQ0; A0A0P5XGU4; A0A0P6FTA8; A0A0P5ECS0; A0A0P5UT23; E9GVW7; A0A0P6EEN9; A0A0P5NEQ8; A0A0N8DYK4	0	1346.67	3.2	High	0	0.002369
	FALSE	High	TADNFIEVDSPISHMIR	1xOxidation [M15]	4.24698e-06	0	7	118	3	A0A0P5BM18; A0A0P5M269; A0A0P5XGU4; A0A0P5ECS0; A0A0N8AKQ7; A0A0P5UT23; A0A0P5YRE9	0	1960.94	4.91	High	0	9.198e-07
	FALSE	High	VFKPYSNVFFR		0.0644609	0	7	111	1	A0A0P5BM18; A0A0P5PPT4; A0A0P5XGU4; A0A0P5ECS0; A0A0N8AKQ7; A0A0P5YRE9; A0A0P5NEQ8	0	1403.75	2.98	High	0	0.04722
	FALSE	High	IQTTWETLGDKLR		0.00029714	0	15	156	4	A0A0P5Z193; A0A0P5BM18; A0A0P4YK27; A0A0P5GUJ5; A0A0P5I5B7; A0A0P5PPT4; A0A0P5PJQ0; A0A0P5XGU4; A0A0P6FTA8; A0A0P5ECS0; A0A0N8AKQ7; A0A0P5KLT7; A0A0P5NG35; A0A0P5NEQ8; A0A0N8DYK4	1	1560.84	3.5	High	0	0.0001097
	FALSE	High	KEIVGTLLMPIFFNK	1xOxidation [M9]	1.70782e-05	0	22	169	2	A0A0P5Z193; E9HZI6; A0A0P5BM18; A0A0P5S327; A0A0P6FZL4; A0A0P4YK27; A0A0P5IAS3; A0A0P5GUJ5; A0A0P5I5B7; A0A0P5LYR5; A0A0P5PJQ0; A0A0P5XGU4; A0A0P6FTA8; A0A0P5ECS0; A0A0N8AKQ7; A0A0P5KLT7; A0A0P5UT23; A0A0P5NG35; E9GVW7; A0A0P6EEN9; A0A0P5NEQ8; A0A0N8DYK4	1	1765.99	4.02	High	0	4.421e-06
	FALSE	High	KEIVGTLLMPIFFNK		0.000437875	0	22	169	1	A0A0P5Z193; E9HZI6; A0A0P5BM18; A0A0P5S327; A0A0P6FZL4; A0A0P4YK27; A0A0P5IAS3; A0A0P5GUJ5; A0A0P5I5B7; A0A0P5LYR5; A0A0P5PJQ0; A0A0P5XGU4; A0A0P6FTA8; A0A0P5ECS0; A0A0N8AKQ7; A0A0P5KLT7; A0A0P5UT23; A0A0P5NG35; E9GVW7; A0A0P6EEN9; A0A0P5NEQ8; A0A0N8DYK4	1	1750	2.73	High	0	0.0001698
	FALSE	High	IEIFPAQQK		0.0373061	0	10	136	1	E9HZI6; A0A0P5BM18; A0A0P5M269; A0A0P5PPT4; A0A0P5XGU4; A0A0P5ECS0; A0A0N8AKQ7; A0A0P5UT23; A0A0P5YRE9; A0A0P5NEQ8	0	1073.6	2.15	High	0	0.02544
	FALSE	High	KTADNFIEVDSPISHMIR	1xOxidation [M16]	1.72514e-08	0	7	117	3	A0A0P5BM18; A0A0P5M269; A0A0P5XGU4; A0A0P5ECS0; A0A0N8AKQ7; A0A0P5UT23; A0A0P5YRE9	1	2089.04	5.75	High	0	1.876e-09
	FALSE	High	FQQNIYSSQTFR		0.0025825	0	9	122	1	A0A0P5BM18; A0A0P5M269; A0A0P5PPT4; A0A0P5XGU4; A0A0P5ECS0; A0A0N8AKQ7; A0A0P5UT23; A0A0P5YRE9; A0A0P5NEQ8	0	1518.73	3.85	High	0	0.001255
	FALSE	High	LPVEVVEAEPK		0.000783288	0	8	131	2	A0A0P5Z193; A0A0P5BM18; A0A0N8DZB7; A0A0P5I5B7; A0A0P5LYR5; A0A0P5ECS0; A0A0N8AKQ7; A0A0P5NG35	0	1209.67	3.23	High	0	0.000327
	FALSE	High	QREWSLYLDNASSETK		2.87507e-07	0	15	150	2	A0A0P5Z193; A0A0P5BM18; A0A0P5M269; A0A0P4YK27; A0A0P5GUJ5; A0A0P5I5B7; A0A0P5PPT4; A0A0P5PJQ0; A0A0P5XGU4; A0A0P6FTA8; A0A0P5ECS0; A0A0N8AKQ7; A0A0P5KLT7; A0A0P5UT23; A0A0P5YRE9	1	1926.92	5.66	High	0	4.445e-08
	FALSE	High	QREWSLYLDNASSETK	1xDeamidated [N10]	0.00402342	0	15	150	1	A0A0P5Z193; A0A0P5BM18; A0A0P5M269; A0A0P4YK27; A0A0P5GUJ5; A0A0P5I5B7; A0A0P5PPT4; A0A0P5PJQ0; A0A0P5XGU4; A0A0P6FTA8; A0A0P5ECS0; A0A0N8AKQ7; A0A0P5KLT7; A0A0P5UT23; A0A0P5YRE9	1	1927.9	3.59	High	0	0.002064
	FALSE	High	VNVNGMEISVTSESYTVK		3.20966e-06	0	8	124	1	A0A0P5BM18; A0A0P5M269; A0A0P5PPT4; A0A0P5XGU4; A0A0P5ECS0; A0A0N8AKQ7; A0A0P5YRE9; A0A0P5NEQ8	0	1956.96	3.79	High	0	6.725e-07
	FALSE	High	VNVNGMEISVTSESYTVK	1xDeamidated [N4]	4.57853e-07	0	8	124	1	A0A0P5BM18; A0A0P5M269; A0A0P5PPT4; A0A0P5XGU4; A0A0P5ECS0; A0A0N8AKQ7; A0A0P5YRE9; A0A0P5NEQ8	0	1957.94	3.67	High	0	7.503e-08
	FALSE	High	VNVNGMEISVTSESYTVK	1xOxidation [M6]	3.01596e-05	0	8	124	2	A0A0P5BM18; A0A0P5M269; A0A0P5PPT4; A0A0P5XGU4; A0A0P5ECS0; A0A0N8AKQ7; A0A0P5YRE9; A0A0P5NEQ8	0	1972.95	4.3	High	0	8.375e-06
	FALSE	High	VNVNGMEISVTSESYTVK	1xDeamidated [N4]; 1xOxidation [M6]	4.66922e-06	0	8	124	1	A0A0P5BM18; A0A0P5M269; A0A0P5PPT4; A0A0P5XGU4; A0A0P5ECS0; A0A0N8AKQ7; A0A0P5YRE9; A0A0P5NEQ8	0	1973.94	2.51	High	0	1.027e-06
	FALSE	High	NVNSPMIMEVEPEILKK	1xOxidation [M6]	5.21259e-05	0	11	99	2	E9HZI6; A0A0P5BM18; A0A0P5F867; A0A0P4YK27; A0A0P5PJQ0; A0A0P5ECS0; A0A0N8AKQ7; A0A0P5UT23; E9GVW7; A0A0P6EEN9; A0A0P5NEQ8	1	1987.02	4.21	High	0	1.553e-05
	FALSE	High	NAENEVLAVIKK		0.00104535	0	9	122	1	E9HZI6; A0A0P5BM18; A0A0P5M269; A0A0P5PPT4; A0A0P5XGU4; A0A0P5ECS0; A0A0N8AKQ7; A0A0P5YRE9; A0A0P5NEQ8	1	1327.76	3.67	High	0	0.0004518
	FALSE	High	NAENEVLAVIKK	1xDeamidated [N]	0.000899057	0	9	122	3	E9HZI6; A0A0P5BM18; A0A0P5M269; A0A0P5PPT4; A0A0P5XGU4; A0A0P5ECS0; A0A0N8AKQ7; A0A0P5YRE9; A0A0P5NEQ8	1	1328.74	3.66	High	0	0.0003829
	FALSE	High	IQTTWETLGDK		0.00864996	0	15	156	2	A0A0P5Z193; A0A0P5BM18; A0A0P4YK27; A0A0P5GUJ5; A0A0P5I5B7; A0A0P5PPT4; A0A0P5PJQ0; A0A0P5XGU4; A0A0P6FTA8; A0A0P5ECS0; A0A0N8AKQ7; A0A0P5KLT7; A0A0P5NG35; A0A0P5NEQ8; A0A0N8DYK4	0	1291.65	2.58	High	0	0.004898
	FALSE	High	NVNSPMIMEVEPEILKK		2.95169e-05	0	11	99	1	E9HZI6; A0A0P5BM18; A0A0P5F867; A0A0P4YK27; A0A0P5PJQ0; A0A0P5ECS0; A0A0N8AKQ7; A0A0P5UT23; E9GVW7; A0A0P6EEN9; A0A0P5NEQ8	1	1971.03	3.71	High	0	8.154e-06
	FALSE	High	NVNSPMIMEVEPEILKK	2xOxidation [M6; M8]	0.000562166	0	11	99	2	E9HZI6; A0A0P5BM18; A0A0P5F867; A0A0P4YK27; A0A0P5PJQ0; A0A0P5ECS0; A0A0N8AKQ7; A0A0P5UT23; E9GVW7; A0A0P6EEN9; A0A0P5NEQ8	1	2003.02	4.46	High	0	0.0002463
	FALSE	High	ITVATTWTR		0.0397517	0	9	144	2	A0A0P5Z193; A0A0P5BM18; A0A0P5PPT4; A0A0P5XGU4; A0A0P5ECS0; A0A0N8AKQ7; A0A0P5KLT7; A0A0P5YRE9; A0A0P5NEQ8	0	1048.58	2.72	High	0	0.02732
	FALSE	High	ISDFTPAILLSETKR		7.1084e-05	0	4	63	1	A0A0P5Z193; A0A0P5BM18; A0A0P4YK27; A0A0P5ECS0	1	1690.94	2.74	High	0	2.197e-05
	FALSE	High	ILPVFNYNSNQGLR		0.000517985	0	8	110	2	E9HZI6; A0A0P5BM18; A0A0N8DZB7; A0A0P4YK27; A0A0P5LYR5; A0A0P5ECS0; A0A0N8AKQ7; E9GVW7	0	1634.86	3.27	High	0	0.004836
	FALSE	High	ILPVFNYNSNQGLR	1xDeamidated [N6]	0.00189406	0	8	110	2	E9HZI6; A0A0P5BM18; A0A0N8DZB7; A0A0P4YK27; A0A0P5LYR5; A0A0P5ECS0; A0A0N8AKQ7; E9GVW7	0	1635.85	2.56	High	0	0.0008834
	FALSE	High	ILPVFNYNSNQGLR	2xDeamidated [N6; N8]	0.0136322	0	8	110	1	E9HZI6; A0A0P5BM18; A0A0N8DZB7; A0A0P4YK27; A0A0P5LYR5; A0A0P5ECS0; A0A0N8AKQ7; E9GVW7	0	1636.83	1.96	High	0	0.00815
	FALSE	High	AYPTTGVDMEWAAALPGR		4.3208e-06	0	9	118	1	A0A0P5Z193; A0A0P5XPE2; A0A0P5BM18; A0A0P4YK27; A0A0P5PJQ0; A0A0P6FTA8; A0A0P5ECS0; A0A0P5UT23; A0A0N8DYK4	0	1905.92	4.21	High	0	9.415e-07
	FALSE	High	AYPTTGVDMEWAAALPGR	1xOxidation [M9]	5.4526e-06	0	9	118	3	A0A0P5Z193; A0A0P5XPE2; A0A0P5BM18; A0A0P4YK27; A0A0P5PJQ0; A0A0P6FTA8; A0A0P5ECS0; A0A0P5UT23; A0A0N8DYK4	0	1921.91	3.95	High	0	1.219e-06
	FALSE	High	VETVAIGKEEPLWIVNFKR		1.07193e-07	0	7	120	2	A0A0P5Z193; A0A0P5BM18; A0A0P4YK27; A0A0P5LYR5; A0A0P5ECS0; A0A0N8AKQ7; A0A0P5NG35	2	2228.24	5.87	High	0	1.464e-08
	FALSE	High	EEPLWIVNFKR		0.00737852	0	9	123	1	A0A0P5Z193; E9HZI6; A0A0P5BM18; A0A0P4YK27; A0A0P5LYR5; A0A0P5ECS0; A0A0N8AKQ7; A0A0P5NG35; E9GVW7	1	1430.78	2.3	High	0	0.004085
	FALSE	High	LVVKPFSYETEATEGLTVQHLTLR		5.89228e-06	0	5	89	1	A0A0P5Z193; A0A0P5BM18; A0A0N8DZB7; A0A0P5ECS0; A0A0N8AKQ7	0	2731.47	4.58	High	0	1.331e-06
	FALSE	High	KISDFTPAILLSETK		8.22611e-07	0	8	109	2	A0A0P5Z193; A0A0P5I0U9; A0A0P5BM18; A0A0P4YK27; A0A0P5PPT4; A0A0P6FTA8; A0A0P5ECS0; A0A0N8AKQ7	1	1662.93	4.65	High	0	1.453e-07
	FALSE	High	EKSETVFGISDVSPLLPK		4.4254e-05	0	11	125	2	A0A0P5BM18; A0A0P5M269; A0A0P5PPT4; A0A0P5XGU4; A0A0P5ECS0; A0A0N8AKQ7; A0A0P5UT23; A0A0P5YRE9; E9GVW7; A0A0P5NEQ8; A0A0P5L1A1	1	1946.05	3.16	High	0	0.00153
	FALSE	High	AIFALSTLAVQK		0.003613	0	12	127	2	A0A0P5Z193; A0A0P5BM18; A0A0P6FZL4; A0A0P4YK27; A0A0P5GUJ5; A0A0P5LYR5; A0A0P5XGU4; A0A0P6FTA8; A0A0P5ECS0; A0A0N8AKQ7; A0A0P5NEQ8; A0A0N8DYK4	0	1261.75	3.19	High	0	0.001831
	FALSE	High	AIFALSTLAVQK	1xDeamidated [Q11]	0.00546083	0	12	127	1	A0A0P5Z193; A0A0P5BM18; A0A0P6FZL4; A0A0P4YK27; A0A0P5GUJ5; A0A0P5LYR5; A0A0P5XGU4; A0A0P6FTA8; A0A0P5ECS0; A0A0N8AKQ7; A0A0P5NEQ8; A0A0N8DYK4	0	1262.74	2.41	High	0	0.002913
	FALSE	High	FVSGKVETVAIGKEEPLWIVNFK	1xDeamidated [N21]	0.0384285	0	7	119	1	A0A0P5Z193; A0A0P5BM18; A0A0P4YK27; A0A0P5LYR5; A0A0P5ECS0; A0A0N8AKQ7; A0A0P5NG35	2	2591.41	1.58	High	0	0.02627
	FALSE	High	NVNSPMIMEVEPEILK	1xOxidation [M]	0.00325839	0	11	99	2	E9HZI6; A0A0P5BM18; A0A0P5F867; A0A0P4YK27; A0A0P5PJQ0; A0A0P5ECS0; A0A0N8AKQ7; A0A0P5UT23; E9GVW7; A0A0P6EEN9; A0A0P5NEQ8	0	1858.93	3.37	High	0	0.00163
	FALSE	High	NVNSPMIMEVEPEILK	2xOxidation [M6; M8]	2.51675e-05	0	11	99	1	E9HZI6; A0A0P5BM18; A0A0P5F867; A0A0P4YK27; A0A0P5PJQ0; A0A0P5ECS0; A0A0N8AKQ7; A0A0P5UT23; E9GVW7; A0A0P6EEN9; A0A0P5NEQ8	0	1874.92	3.33	High	0	6.82e-06
	FALSE	High	NAENEVLAVIK	1xDeamidated [N]	0.00203792	0	9	122	2	E9HZI6; A0A0P5BM18; A0A0P5M269; A0A0P5PPT4; A0A0P5XGU4; A0A0P5ECS0; A0A0N8AKQ7; A0A0P5YRE9; A0A0P5NEQ8	0	1200.65	3.27	High	0	0.0009605
	FALSE	High	GIEIHPVAEVILPK		0.000513541	0	6	108	2	A0A0P5BM18; A0A0P5PPT4; A0A0P5XGU4; A0A0P5ECS0; A0A0N8AKQ7; A0A0P5YRE9	0	1514.89	3.18	High	0	0.0004855
	FALSE	High	AKAIFALSTLAVQK		0.0317518	0	12	127	1	A0A0P5Z193; A0A0P5BM18; A0A0P6FZL4; A0A0P4YK27; A0A0P5GUJ5; A0A0P5LYR5; A0A0P5XGU4; A0A0P6FTA8; A0A0P5ECS0; A0A0N8AKQ7; A0A0P5NEQ8; A0A0N8DYK4	1	1460.88	2.09	High	0	0.02115
	FALSE	High	AIFALSTLAVQKK		9.08705e-05	0	12	127	1	A0A0P5Z193; A0A0P5BM18; A0A0P6FZL4; A0A0P4YK27; A0A0P5GUJ5; A0A0P5LYR5; A0A0P5XGU4; A0A0P6FTA8; A0A0P5ECS0; A0A0N8AKQ7; A0A0P5NEQ8; A0A0N8DYK4	1	1389.85	3.44	High	0	2.892e-05
	FALSE	High	AIFALSTLAVQKK	1xDeamidated [Q11]	0.000401727	0	12	127	2	A0A0P5Z193; A0A0P5BM18; A0A0P6FZL4; A0A0P4YK27; A0A0P5GUJ5; A0A0P5LYR5; A0A0P5XGU4; A0A0P6FTA8; A0A0P5ECS0; A0A0N8AKQ7; A0A0P5NEQ8; A0A0N8DYK4	1	1390.83	3.67	High	0	0.0001541
	FALSE	High	KISDFTPAILLSETKR		2.86271e-07	0	4	63	2	A0A0P5Z193; A0A0P5BM18; A0A0P4YK27; A0A0P5ECS0	2	1819.03	6.16	High	0	4.44e-08
	FALSE	High	DLMDVAYELR		0.0185546	0	9	127	1	A0A0P5BM18; A0A0P5M269; A0A0P5PPT4; A0A0P5XGU4; A0A0P5ECS0; A0A0N8AKQ7; A0A0P5UT23; A0A0P5YRE9; A0A0P5NEQ8	0	1224.59	2.47	High	0	0.01156
	FALSE	High	ISSDVHIYQTLAYSYDDDYK		0.000351504	0	9	125	1	A0A0P5Z193; A0A0P5BM18; A0A0P5F867; A0A0N8DZB7; A0A0P5I5B7; A0A0P5LYR5; A0A0P5ECS0; A0A0N8AKQ7; A0A0P5NG35	0	2396.09	3.68	High	0	0.000133
	FALSE	High	EWSLYLDNASSETK		5.73083e-05	0	16	152	1	A0A0P5Z193; A0A0P5BM18; A0A0P5M269; A0A0P4YK27; A0A0P5GUJ5; A0A0P5I5B7; A0A0P5PPT4; A0A0P5PJQ0; A0A0P5XGU4; A0A0P6FTA8; A0A0P5ECS0; A0A0N8AKQ7; A0A0P5KLT7; A0A0P5UT23; A0A0P5YRE9; A0A0N8DYK4	0	1642.76	3.57	High	0	1.721e-05
	FALSE	High	EWSLYLDNASSETK	1xDeamidated [N8]	0.00133051	0	16	152	1	A0A0P5Z193; A0A0P5BM18; A0A0P5M269; A0A0P4YK27; A0A0P5GUJ5; A0A0P5I5B7; A0A0P5PPT4; A0A0P5PJQ0; A0A0P5XGU4; A0A0P6FTA8; A0A0P5ECS0; A0A0N8AKQ7; A0A0P5KLT7; A0A0P5UT23; A0A0P5YRE9; A0A0N8DYK4	0	1643.74	2.49	High	0	0.0005946
	FALSE	High	DLMDVAYELR	1xOxidation [M3]	0.0161111	0	9	127	1	A0A0P5BM18; A0A0P5M269; A0A0P5PPT4; A0A0P5XGU4; A0A0P5ECS0; A0A0N8AKQ7; A0A0P5UT23; A0A0P5YRE9; A0A0P5NEQ8	0	1240.59	3.03	High	0	0.009868
	FALSE	High	LLPAPELCQNFPVYEIVK	1xCarbamidomethyl [C8]	0.000149784	0	11	132	2	A0A0P5Z193; E9HZI6; A0A0P5BM18; A0A0N8DZB7; A0A0P4YK27; A0A0P5I5B7; A0A0P5LYR5; A0A0P5ECS0; A0A0N8AKQ7; A0A0P5NG35; E9GVW7	0	2130.13	3.57	High	0	5.079e-05
	FALSE	High	LCGLCGSQNGDK	2xCarbamidomethyl [C2; C5]	0.0014502	0	8	121	1	A0A0P5BM18; A0A0P5M269; A0A0P5PPT4; A0A0P5XGU4; A0A0P5ECS0; A0A0N8AKQ7; A0A0P5UT23; A0A0P5NEQ8	0	1308.57	2.4	High	0	0.0006534
	FALSE	High	LCGLCGSQNGDK	2xCarbamidomethyl [C2; C5]; 1xDeamidated [N9]	0.00150104	0	8	121	2	A0A0P5BM18; A0A0P5M269; A0A0P5PPT4; A0A0P5XGU4; A0A0P5ECS0; A0A0N8AKQ7; A0A0P5UT23; A0A0P5NEQ8	0	1309.55	2.68	High	0	0.0006812
	FALSE	High	IHEELKIEAR		0.00358203	0	19	168	2	E9HZI6; A0A0P5BM18; A0A0P5S327; A0A0P4YK27; A0A0P5GUJ5; A0A0P5I5B7; A0A0P5PPT4; A0A0P5PJQ0; A0A0P5XGU4; A0A0P6FTA8; A0A0P5ECS0; A0A0N8AKQ7; A0A0P5KLT7; A0A0P5UT23; A0A0P5NG35; E9GVW7; A0A0P6EEN9; A0A0P5NEQ8; A0A0N8DYK4	1	1237.69	3.92	High	0	0.00455
	FALSE	High	HSVVPFTTVRK		0.0297906	0	13	119	1	A0A0P5Z193; A0A0P5I0U9; A0A0P5BM18; A0A0P5GUJ5; A0A0P5PPT4; A0A0P5PJQ0; A0A0P5XGU4; A0A0P5ECS0; A0A0N8AKQ7; A0A0P5UT23; A0A0P5NEQ8; A0A0N8BQS0; A0A0N8DYK4	1	1270.73	3.18	High	0	0.01973
	FALSE	High	YSEVDPGQEVR		0.00347572	0	10	122	2	A0A0P5Z193; E9HZI6; A0A0P5BM18; A0A0N8DZB7; A0A0P4YK27; A0A0P5LYR5; A0A0P5ECS0; A0A0N8AKQ7; A0A0P5NG35; E9GVW7	0	1278.6	3.19	High	0	0.001754
	FALSE	High	RPSQWTVYR		0.0129487	0	9	121	1	E9HZI6; A0A0P5BM18; A0A0P5M269; A0A0P5XGU4; A0A0P5ECS0; A0A0N8AKQ7; A0A0P5UT23; A0A0P5YRE9; A0A0P5NEQ8	0	1192.62	2.63	High	0	0.007689
	FALSE	High	CFSTESVPK	1xCarbamidomethyl [C1]	0.0514139	0	12	119	2	E9HZI6; A0A0P5BM18; A0A0P5M269; A0A0P5PPT4; A0A0P5XGU4; A0A0P5ECS0; A0A0N8AKQ7; A0A0P5UT23; A0A0P5YRE9; E9GVW7; A0A0P5NEQ8; A0A0P5L1A1	0	1054.49	2.58	High	0	0.03656
	FALSE	High	SETVFGISDVSPLLPK		0.000457151	0	11	125	1	A0A0P5BM18; A0A0P5M269; A0A0P5PPT4; A0A0P5XGU4; A0A0P5ECS0; A0A0N8AKQ7; A0A0P5UT23; A0A0P5YRE9; E9GVW7; A0A0P5NEQ8; A0A0P5L1A1	0	1688.91	3.32	High	0	0.0001781
	FALSE	High	IAGEQAVQAISALVPTVETPTK		6.45024e-06	0	8	94	1	A0A0P5BM18; A0A0P4YK27; A0A0P5PJQ0; A0A0P6FTA8; A0A0P5ECS0; A0A0P5UT23; A0A0P5NEQ8; A0A0N8DYK4	0	2223.22	4.13	High	0	1.477e-06
	FALSE	High	RIGSSIVYGMDGK	1xOxidation [M10]	0.00503227	0	13	138	2	A0A0P5Z193; A0A0P5BM18; A0A0P4YK27; A0A0P5GUJ5; A0A0P5PPT4; A0A0P5PJQ0; A0A0P5XGU4; A0A0P5ECS0; A0A0N8AKQ7; A0A0P5KLT7; A0A0P5UT23; A0A0P5YRE9; A0A0P5NEQ8	1	1398.7	2.71	High	0.00329	0.126
	FALSE	High	DWFGTLAFAAMPSTIR	1xOxidation [M11]	0.000513541	0	10	114	2	A0A0P5Z193; A0A0P5BM18; A0A0P5GUJ5; A0A0P5PPT4; A0A0P5XGU4; A0A0P6FTA8; A0A0P5ECS0; A0A0N8AKQ7; A0A0P5UT23; A0A0P5NEQ8	0	1799.88	3.09	High	0	0.0002032
	FALSE	High	ELLTSLMEFLK	1xOxidation [M7]	0.0208242	0	13	108	1	A0A0P5Z193; A0A0P5BM18; A0A0P4YK27; A0A0P5F3B7; A0A0P5RAR4; A0A0P5PJQ0; A0A0P6FTA8; A0A0P5ECS0; A0A0N8AKQ7; A0A0P5UT23; A0A0P6EEN9; A0A0P5NEQ8; A0A0N8DYK4	0	1339.72	2.72	High	0	0.01313
	FALSE	High	ELLTSLMEFLK		0.0618253	0	13	108	1	A0A0P5Z193; A0A0P5BM18; A0A0P4YK27; A0A0P5F3B7; A0A0P5RAR4; A0A0P5PJQ0; A0A0P6FTA8; A0A0P5ECS0; A0A0N8AKQ7; A0A0P5UT23; A0A0P6EEN9; A0A0P5NEQ8; A0A0N8DYK4	0	1323.72	1.64	High	0	0.04502
	FALSE	High	EIVGTLLMPIFFNK	1xOxidation [M8]	0.000105206	0	22	169	3	A0A0P5Z193; E9HZI6; A0A0P5BM18; A0A0P5S327; A0A0P6FZL4; A0A0P4YK27; A0A0P5IAS3; A0A0P5GUJ5; A0A0P5I5B7; A0A0P5LYR5; A0A0P5PJQ0; A0A0P5XGU4; A0A0P6FTA8; A0A0P5ECS0; A0A0N8AKQ7; A0A0P5KLT7; A0A0P5UT23; A0A0P5NG35; E9GVW7; A0A0P6EEN9; A0A0P5NEQ8; A0A0N8DYK4	0	1637.9	3.87	High	0	3.42e-05
	FALSE	High	EIVGTLLMPIFFNK		0.00626649	0	22	169	2	A0A0P5Z193; E9HZI6; A0A0P5BM18; A0A0P5S327; A0A0P6FZL4; A0A0P4YK27; A0A0P5IAS3; A0A0P5GUJ5; A0A0P5I5B7; A0A0P5LYR5; A0A0P5PJQ0; A0A0P5XGU4; A0A0P6FTA8; A0A0P5ECS0; A0A0N8AKQ7; A0A0P5KLT7; A0A0P5UT23; A0A0P5NG35; E9GVW7; A0A0P6EEN9; A0A0P5NEQ8; A0A0N8DYK4	0	1621.9	1.87	High	0	0.003393
	FALSE	High	LAALTLLFVSNPPQAFWSR		0.0037557	0	19	158	1	A0A0P5Z193; E9HZI6; A0A0P5BM18; A0A0P5S327; A0A0P6FZL4; A0A0P4YK27; A0A0P5GUJ5; A0A0P5I5B7; A0A0P5PJQ0; A0A0P5XGU4; A0A0P6FTA8; A0A0P5ECS0; A0A0N8AKQ7; A0A0P5KLT7; A0A0P5UT23; A0A0P5NG35; E9GVW7; A0A0P6EEN9; A0A0P5NEQ8	0	2131.17	2.48	High	0	0.001914
	FALSE	High	ATGQPELYIYLNFLDNYQR		7.26318e-05	0	21	168	1	A0A0P5Z193; E9HZI6; A0A0P5XPE2; A0A0P5BM18; A0A0P5S327; A0A0P4YK27; A0A0P5IAS3; A0A0P5GUJ5; A0A0P5I5B7; A0A0P5PPT4; A0A0P5PJQ0; A0A0P5XGU4; A0A0P5ECS0; A0A0N8AKQ7; A0A0P5KLT7; A0A0P5UT23; A0A0P5NG35; E9GVW7; A0A0P6EEN9; A0A0P5NEQ8; A0A0N8DYK4	0	2318.15	2.83	High	0	2.246e-05
	FALSE	High	LQEECLKEK	1xCarbamidomethyl [C5]	0.0554498	0	12	131	4	E9HZI6; A0A0P5BM18; A0A0P5M269; A0A0P5PPT4; A0A0P5XGU4; A0A0P5ECS0; A0A0N8AKQ7; A0A0P5UT23; A0A0P5YRE9; E9GVW7; A0A0P5NEQ8; A0A0P5L1A1	1	1176.59	2.03	High	0.00329	0.0946
	FALSE	High	LLSEIISDVESEAYYVDPSTK		3.49175e-05	0	6	88	6	A0A0P5Z193; A0A0P5BM18; A0A0P5PJQ0; A0A0P5ECS0; A0A0N8AKQ7; A0A0P5NEQ8	0	2358.16	3.86	High	0	9.862e-06
	FALSE	High	LVMGEFCNPSDSIVASQLVPYLAEQAK	1xCarbamidomethyl [C7]; 1xOxidation [M3]	4.74122e-05	0	13	136	1	E9HZI6; A0A0P5BM18; A0A0P5I5B7; A0A0P5RAR4; A0A0P5PJQ0; A0A0P6FTA8; A0A0P5ECS0; A0A0N8AKQ7; A0A0P5KLT7; A0A0P5UT23; A0A0P5NG35; A0A0P6EEN9; A0A0P5NEQ8	0	2982.46	4.82	High	0	1.393e-05
	FALSE	High	GRLCGLCGSQNGDK	2xCarbamidomethyl [C4; C7]; 1xDeamidated [N11]	0.0394168	0	8	119	1	A0A0P5BM18; A0A0P5M269; A0A0P5PPT4; A0A0P5XGU4; A0A0P5ECS0; A0A0N8AKQ7; A0A0P5UT23; A0A0P5NEQ8	1	1522.67	2.71	High	0	0.027
	FALSE	High	CNLVNGAGCENK	2xCarbamidomethyl [C1; C9]	0.000721732	0	9	126	2	E9HZI6; A0A0P5BM18; A0A0N8DZB7; A0A0P5I5B7; A0A0P5LYR5; A0A0P5ECS0; A0A0N8AKQ7; A0A0P5NG35; E9GVW7	0	1335.58	3.23	High	0	0.000299
	FALSE	High	CNLVNGAGCENK	2xCarbamidomethyl [C1; C9]; 1xDeamidated [N5]	0.0153042	0	9	126	1	E9HZI6; A0A0P5BM18; A0A0N8DZB7; A0A0P5I5B7; A0A0P5LYR5; A0A0P5ECS0; A0A0N8AKQ7; A0A0P5NG35; E9GVW7	0	1336.56	1.83	High	0	0.009289
	FALSE	High	GRLCGLCGSQNGDK	2xCarbamidomethyl [C4; C7]	0.0202972	0	8	119	1	A0A0P5BM18; A0A0P5M269; A0A0P5PPT4; A0A0P5XGU4; A0A0P5ECS0; A0A0N8AKQ7; A0A0P5UT23; A0A0P5NEQ8	1	1521.69	2.46	High	0	0.0128
	FALSE	High	LSYVEEPKENK		0.00320277	0	11	108	4	A0A0P5Z193; A0A0P5XPE2; A0A0P5BM18; A0A0P4YK27; A0A0P5I5B7; A0A0P5PJQ0; A0A0P5XGU4; A0A0P5ECS0; A0A0P5KLT7; A0A0P5UT23; A0A0N8DYK4	1	1335.68	2.92	High	0	0.001599
	FALSE	High	RLSYVEEPKENK		0.00971345	0	11	108	4	A0A0P5Z193; A0A0P5XPE2; A0A0P5BM18; A0A0P4YK27; A0A0P5I5B7; A0A0P5PJQ0; A0A0P5XGU4; A0A0P5ECS0; A0A0P5KLT7; A0A0P5UT23; A0A0N8DYK4	2	1491.78	3.37	High	0	0.005556
	FALSE	High	GMSDECIAAR	1xCarbamidomethyl [C6]; 1xOxidation [M2]	0.00498916	0	6	83	1	A0A0P5Z193; A0A0P5BM18; A0A0P5M269; A0A0P5XGU4; A0A0P5ECS0; A0A0P5YRE9	0	1125.47	2.3	High	0	0.002629
	FALSE	High	VANKNPLNREETVR		0.00482037	0	18	159	2	A0A0P5BM18; A0A0P5S327; A0A0P6FZL4; A0A0P4YK27; A0A0P5IAS3; A0A0P5GUJ5; A0A0P5I5B7; A0A0P5PJQ0; A0A0P5XGU4; A0A0P6FTA8; A0A0P5ECS0; A0A0N8AKQ7; A0A0P5KLT7; A0A0P5UT23; A0A0P5NG35; A0A0P6EEN9; A0A0P5NEQ8; A0A0N8DYK4	2	1639.89	2.96	High	0	0.002533
	FALSE	High	VANKNPLNREETVR	1xDeamidated [N]	0.0275941	0	18	159	2	A0A0P5BM18; A0A0P5S327; A0A0P6FZL4; A0A0P4YK27; A0A0P5IAS3; A0A0P5GUJ5; A0A0P5I5B7; A0A0P5PJQ0; A0A0P5XGU4; A0A0P6FTA8; A0A0P5ECS0; A0A0N8AKQ7; A0A0P5KLT7; A0A0P5UT23; A0A0P5NG35; A0A0P6EEN9; A0A0P5NEQ8; A0A0N8DYK4	2	1640.87	2.08	High	0	0.01806
	FALSE	High	EKIEIFPAQQK		0.0100529	0	10	136	1	E9HZI6; A0A0P5BM18; A0A0P5M269; A0A0P5PPT4; A0A0P5XGU4; A0A0P5ECS0; A0A0N8AKQ7; A0A0P5UT23; A0A0P5YRE9; A0A0P5NEQ8	1	1330.74	2.7	High	0	0.005796
	FALSE	High	IIDQEHLEKPFQVK		2.09114e-05	0	9	122	4	E9HZI6; A0A0P5BM18; A0A0N8DZB7; A0A0P4YK27; A0A0P5LYR5; A0A0P5ECS0; A0A0N8AKQ7; A0A0P5NG35; E9GVW7	0	1723.94	3.97	High	0	5.542e-06
	FALSE	High	LNEEMSSRPLDELMGK		0.00155366	0	5	54	1	A0A0P5BM18; A0A0P5M269; A0A0P5PPT4; A0A0N8AKQ7; A0A0P5NEQ8	0	1848.88	3.72	High	0	0.0007073
	FALSE	High	LNEEMSSRPLDELMGK	1xOxidation [M14]	0.00839371	0	5	54	2	A0A0P5BM18; A0A0P5M269; A0A0P5PPT4; A0A0N8AKQ7; A0A0P5NEQ8	0	1864.88	3.22	High	0	0.004721
	FALSE	High	LNEEMSSRPLDELMGK	2xOxidation [M5; M14]	0.000103855	0	5	54	2	A0A0P5BM18; A0A0P5M269; A0A0P5PPT4; A0A0N8AKQ7; A0A0P5NEQ8	0	1880.87	4.2	High	0	0.001311
	FALSE	High	HSVVPFTTVR		0.0110959	0	13	120	1	A0A0P5Z193; A0A0P5I0U9; A0A0P5BM18; A0A0P5GUJ5; A0A0P5PPT4; A0A0P5PJQ0; A0A0P5XGU4; A0A0P5ECS0; A0A0N8AKQ7; A0A0P5UT23; A0A0P5NEQ8; A0A0N8BQS0; A0A0N8DYK4	0	1142.63	2.74	High	0	0.006459
	FALSE	High	SNKDESSIISPELEK		3.41579e-07	0	16	145	2	A0A0P5Z193; A0A0P5XPE2; A0A0P5BM18; A0A0P5S327; A0A0P4YK27; A0A0P5IAS3; A0A0P5GUJ5; A0A0P5I5B7; A0A0P5PJQ0; A0A0P5XGU4; A0A0P6FTA8; A0A0P5ECS0; A0A0P5UT23; A0A0P6EEN9; A0A0P5NEQ8; A0A0N8DYK4	1	1675.84	4.32	High	0	5.409e-08
	FALSE	High	KIVTVLLNK		0.0132861	0	9	142	1	A0A0P5BM18; A0A0P5M269; A0A0P5PPT4; A0A0P5XGU4; A0A0P5ECS0; A0A0N8AKQ7; A0A0P5UT23; A0A0P5YRE9; A0A0P5NEQ8	1	1027.69	3.37	High	0	0.007914
	FALSE	High	IIGCTSNEGHFIVQR	1xCarbamidomethyl [C4]	1.19668e-06	0	9	122	2	A0A0P5Z193; A0A0P5BM18; A0A0N8DZB7; A0A0P4YK27; A0A0P5I5B7; A0A0P5LYR5; A0A0P5ECS0; A0A0N8AKQ7; A0A0P5NG35	0	1730.86	4.84	High	0	2.218e-07
	FALSE	High	GRLCGLCGSQNGDKVTDLTGPR	2xCarbamidomethyl [C4; C7]; 1xDeamidated [N/Q]	2.08925e-09	0	7	106	4	A0A0P5BM18; A0A0P5M269; A0A0P5PPT4; A0A0P5XGU4; A0A0P5ECS0; A0A0N8AKQ7; A0A0P5UT23	2	2362.12	6.69	High	0	1.945e-07
	FALSE	High	SLFDTIYGEQIMSQEYVR	1xOxidation [M12]	6.41011e-05	0	10	94	1	A0A0P5I0U9; A0A0P5BM18; A0A0P4YK27; A0A0P5GUJ5; A0A0P5PPT4; A0A0P5PJQ0; A0A0P5ECS0; A0A0N8AKQ7; A0A0P5NEQ8; A0A0N8DYK4	0	2195.03	2.86	High	0	1.952e-05
	FALSE	High	AESEDWEDEALCNLVR	1xCarbamidomethyl [C12]	1.02918e-06	0	16	156	1	A0A0P5Z193; A0A0P5BM18; A0A0P4YK27; A0A0P5IAS3; A0A0P5I5B7; A0A0P5LYR5; A0A0P5PJQ0; A0A0P5XGU4; A0A0P6FTA8; A0A0P5ECS0; A0A0N8AKQ7; A0A0P5KLT7; A0A0P5UT23; A0A0P5NG35; A0A0P5NEQ8; A0A0N8DYK4	0	1935.84	4.34	High	0	1.871e-07
	FALSE	High	EGSVTGECQTWYHISR	1xCarbamidomethyl [C8]	0.000354546	0	1	1	1	A0A0P5BM18	0	1909.85	3.6	High	0	0.0001341
	FALSE	High	LAVVQPSVYSK		0.00621283	0	14	125	2	A0A0P5Z193; A0A0P5I0U9; A0A0P5BM18; A0A0P4YK27; A0A0P5GUJ5; A0A0P5PPT4; A0A0P5PJQ0; A0A0P5XGU4; A0A0P6FTA8; A0A0P5ECS0; A0A0N8AKQ7; A0A0P5NEQ8; A0A0N8BQS0; A0A0N8DYK4	0	1190.68	3.16	High	0	0.003369
	FALSE	High	LCGLCGSQNGDKVTDLTGPR	2xCarbamidomethyl [C2; C5]	1.06274e-07	0	7	108	2	A0A0P5BM18; A0A0P5M269; A0A0P5PPT4; A0A0P5XGU4; A0A0P5ECS0; A0A0N8AKQ7; A0A0P5UT23	1	2148.02	4.89	High	0	6.056e-07
	FALSE	High	LCGLCGSQNGDKVTDLTGPR	2xCarbamidomethyl [C2; C5]; 1xDeamidated [N9]	8.15183e-09	0	7	108	4	A0A0P5BM18; A0A0P5M269; A0A0P5PPT4; A0A0P5XGU4; A0A0P5ECS0; A0A0N8AKQ7; A0A0P5UT23	1	2149	6.14	High	0	8.091e-10
	FALSE	High	ISDFTPAILLSETK		4.4637e-05	0	8	109	1	A0A0P5Z193; A0A0P5I0U9; A0A0P5BM18; A0A0P4YK27; A0A0P5PPT4; A0A0P6FTA8; A0A0P5ECS0; A0A0N8AKQ7	0	1534.84	4.06	High	0	1.303e-05
	FALSE	High	IGSSIVYGMDGK	1xOxidation [M9]	0.00385394	0	13	138	1	A0A0P5Z193; A0A0P5BM18; A0A0P4YK27; A0A0P5GUJ5; A0A0P5PPT4; A0A0P5PJQ0; A0A0P5XGU4; A0A0P5ECS0; A0A0N8AKQ7; A0A0P5KLT7; A0A0P5UT23; A0A0P5YRE9; A0A0P5NEQ8	0	1242.6	3.29	High	0	0.001964
	FALSE	High	FKSNKDESSIISPELEK		1.6924e-07	0	16	144	3	A0A0P5Z193; A0A0P5XPE2; A0A0P5BM18; A0A0P5S327; A0A0P4YK27; A0A0P5IAS3; A0A0P5GUJ5; A0A0P5I5B7; A0A0P5PJQ0; A0A0P5XGU4; A0A0P6FTA8; A0A0P5ECS0; A0A0P5UT23; A0A0P6EEN9; A0A0P5NEQ8; A0A0N8DYK4	2	1951	5.15	High	0	2.455e-08
	FALSE	High	AVMTIKYNEMPAVVR	2xOxidation [M3; M10]	0.0313497	0	11	151	1	A0A0P5Z193; A0A0P5BM18; A0A0P5M269; A0A0P5PPT4; A0A0P5XGU4; A0A0P5ECS0; A0A0N8AKQ7; A0A0P5KLT7; A0A0P5UT23; A0A0P5YRE9; A0A0P5NEQ8	1	1753.9	2.67	High	0	0.02089
	FALSE	High	ISYVEEPKENKVTFGEK		0.000116666	0	7	67	4	A0A0P5XPE2; A0A0P5BM18; A0A0P4YK27; A0A0P5XGU4; A0A0P5ECS0; A0A0P5UT23; A0A0N8DYK4	2	1997.02	4.03	High	0	4.26e-05
	FALSE	High	LSYVEEPKENKVTFGEK	1xDeamidated [N10]	0.00355133	0	7	67	2	A0A0P5XPE2; A0A0P5BM18; A0A0P4YK27; A0A0P5XGU4; A0A0P5ECS0; A0A0P5UT23; A0A0N8DYK4	2	1998.01	3.06	High	0	0.00179
	FALSE	High	IVTVLLNKEK		0.062344	0	9	139	1	A0A0P5BM18; A0A0P5M269; A0A0P5PPT4; A0A0P5XGU4; A0A0P5ECS0; A0A0N8AKQ7; A0A0P5UT23; A0A0P5YRE9; A0A0P5NEQ8	1	1156.73	2.18	High	0	0.04544
	FALSE	High	FVSGKVETVAIGK		0.0533949	0	8	126	1	A0A0P5Z193; A0A0P5BM18; A0A0N8DZB7; A0A0P4YK27; A0A0P5LYR5; A0A0P5ECS0; A0A0N8AKQ7; A0A0P5NG35	1	1334.77	1.9	High	0	0.03817
	FALSE	High	FFTINPNTIFR		0.00643025	0	19	164	3	A0A0P5XPE2; A0A0P5BM18; A0A0P5S327; A0A0P4YK27; A0A0P5IAS3; A0A0P5I5B7; A0A0P5PPT4; A0A0P5PJQ0; A0A0P5XGU4; A0A0P6FTA8; A0A0P5ECS0; A0A0N8AKQ7; A0A0P5R4V4; A0A0P5KLT7; A0A0P5UT23; A0A0P5NG35; A0A0P6EEN9; A0A0P5NEQ8; A0A0N8DYK4	0	1369.73	2.68	High	0	0.004597
	FALSE	High	IEGALKPVVVSK		0.000210513	0	13	162	6	A0A0P5XPE2; A0A0P5BM18; A0A0P5I5B7; A0A0P5PPT4; A0A0P5XGU4; A0A0P6FTA8; A0A0P5ECS0; A0A0N8AKQ7; A0A0P5KLT7; A0A0P5NG35; A0A0P5NEQ8; A0A0N8BQS0; A0A0N8DYK4	0	1239.77	3.92	High	0	7.445e-05
	FALSE	High	SEEDISPSLR		0.0253406	0	9	129	1	A0A0P5Z193; A0A0P5BM18; A0A0P5PPT4; A0A0P5XGU4; A0A0P5ECS0; A0A0N8AKQ7; A0A0P5KLT7; A0A0P5YRE9; A0A0P5NEQ8	0	1132.55	2.73	High	0	0.01641
	FALSE	High	ENAGKWEINFHK		0.0153698	0	14	121	1	A0A0P5Z193; A0A0P5XPE2; A0A0P5BM18; A0A0P5S327; A0A0P5IAS3; A0A0P5GUJ5; A0A0P5PJQ0; A0A0P6FTA8; A0A0P5ECS0; A0A0P5UT23; A0A0P6EEN9; A0A0P5NEQ8; A0A0N8BQS0; A0A0N8DYK4	1	1472.73	3.02	High	0	0.009346
	FALSE	High	EEPLWIVNFK		0.0103152	0	9	124	1	A0A0P5Z193; E9HZI6; A0A0P5BM18; A0A0P4YK27; A0A0P5LYR5; A0A0P5ECS0; A0A0N8AKQ7; A0A0P5NG35; E9GVW7	0	1274.68	2.1	High	0	0.005951
	FALSE	High	LMEISIDSK		0.0556828	0	17	161	1	A0A0P5Z193; A0A0P5XPE2; A0A0P5BM18; A0A0P5S327; A0A0P5GUJ5; A0A0P5I5B7; A0A0P5PPT4; A0A0P5PJQ0; A0A0P5XGU4; A0A0P6FTA8; A0A0P5ECS0; A0A0N8AKQ7; A0A0P5KLT7; A0A0P5UT23; A0A0P5NG35; A0A0P6EEN9; A0A0P5NEQ8	0	1035.54	2.39	High	0	0.03997
	FALSE	High	LMEISIDSK	1xOxidation [M2]	0.0476639	0	17	161	1	A0A0P5Z193; A0A0P5XPE2; A0A0P5BM18; A0A0P5S327; A0A0P5GUJ5; A0A0P5I5B7; A0A0P5PPT4; A0A0P5PJQ0; A0A0P5XGU4; A0A0P6FTA8; A0A0P5ECS0; A0A0N8AKQ7; A0A0P5KLT7; A0A0P5UT23; A0A0P5NG35; A0A0P6EEN9; A0A0P5NEQ8	0	1051.53	2.43	High	0	0.03344
	FALSE	High	YNEMPAVVR		0.0851047	0.000973478	11	152	1	A0A0P5Z193; A0A0P5BM18; A0A0P5M269; A0A0P5PPT4; A0A0P5XGU4; A0A0P5ECS0; A0A0N8AKQ7; A0A0P5KLT7; A0A0P5UT23; A0A0P5YRE9; A0A0P5NEQ8	0	1078.53	2.45	High	0.0007147	0.06469
	FALSE	High	RCFSTESVPK	1xCarbamidomethyl [C2]	0.080995	0.000973478	12	119	1	E9HZI6; A0A0P5BM18; A0A0P5M269; A0A0P5PPT4; A0A0P5XGU4; A0A0P5ECS0; A0A0N8AKQ7; A0A0P5UT23; A0A0P5YRE9; E9GVW7; A0A0P5NEQ8; A0A0P5L1A1	1	1210.59	2.99	High	0.0007147	0.06121
	FALSE	High	ITTALSLSR		0.0858086	0.000973478	17	144	1	A0A0P5Z193; E9HZI6; A0A0P5BM18; A0A0P5F867; A0A0P5S327; A0A0P4YK27; A0A0P5I5B7; A0A0P5LYR5; A0A0P5PJQ0; A0A0P5ECS0; A0A0N8AKQ7; A0A0P5KLT7; A0A0P5NG35; E9GVW7; A0A0P6EEN9; A0A0P5NEQ8; A0A0N8DYK4	0	961.568	2.48	High	0.0007147	0.06514
	FALSE	High	YWPLLDSFAR		0.0783607	0.000973478	11	116	2	A0A0P5Z193; A0A0P5BM18; A0A0P5S327; A0A0P5IAS3; A0A0P5PJQ0; A0A0P6FTA8; A0A0P5ECS0; A0A0P5UT23; A0A0P6EEN9; A0A0P5NEQ8; A0A0N8BQS0	0	1267.65	1.84	High	0.003911	0.1302
	FALSE	High	YNEMPAVVR	1xOxidation [M4]	0.0721274	0.000973478	11	152	1	A0A0P5Z193; A0A0P5BM18; A0A0P5M269; A0A0P5PPT4; A0A0P5XGU4; A0A0P5ECS0; A0A0N8AKQ7; A0A0P5KLT7; A0A0P5UT23; A0A0P5YRE9; A0A0P5NEQ8	0	1094.53	2.47	High	0.0007147	0.05362
	FALSE	High	KITVATTWTR		0.0751824	0.000973478	9	142	2	A0A0P5Z193; A0A0P5BM18; A0A0P5PPT4; A0A0P5XGU4; A0A0P5ECS0; A0A0N8AKQ7; A0A0P5KLT7; A0A0P5YRE9; A0A0P5NEQ8	1	1176.67	3.33	High	0.008045	0.1851
	FALSE	High	QQDSQWESQK		0.115584	0.00283597	17	158	1	A0A0P5I0U9; E9HZI6; A0A0P5BM18; A0A0P5M269; A0A0P4YK27; A0A0P5GUJ5; A0A0P5I5B7; A0A0P5PPT4; A0A0P5PJQ0; A0A0P5XGU4; A0A0P5ECS0; A0A0N8AKQ7; A0A0P5KLT7; A0A0P5UT23; A0A0P5YRE9; E9GVW7; A0A0P5NEQ8	0	1263.56	1.69	High	0.002777	0.09138
	FALSE	High	VETVAIGK		0.135175	0.00358207	8	127	1	A0A0P5Z193; A0A0P5BM18; A0A0N8DZB7; A0A0P4YK27; A0A0P5LYR5; A0A0P5ECS0; A0A0N8AKQ7; A0A0P5NG35	0	816.483	2	High	0.00329	0.1092
	FALSE	High	FAIEGDMK		0.149869	0.00358207	16	149	2	A0A0P5Z193; A0A0P5XPE2; A0A0P5BM18; A0A0P4YK27; A0A0P5GUJ5; A0A0P5I5B7; A0A0P5PPT4; A0A0P6FTA8; A0A0P5ECS0; A0A0N8AKQ7; A0A0P5KLT7; A0A0P5UT23; A0A0P5NG35; A0A0P5NEQ8; A0A0N8BQS0; A0A0N8DYK4	0	910.434	2.01	High	0.00329	0.1224
	FALSE	High	LGFHCLPK	1xCarbamidomethyl [C5]	0.131449	0.00358207	12	122	1	E9HZI6; A0A0P5BM18; A0A0P5M269; A0A0P5PPT4; A0A0P5XGU4; A0A0P5ECS0; A0A0N8AKQ7; A0A0P5UT23; A0A0P5YRE9; E9GVW7; A0A0P5NEQ8; A0A0P5L1A1	0	971.513	2.23	High	0.00329	0.1058
	FALSE	High	GIEIHPVAEVILPKR		0.146356	0.00358207	6	108	1	A0A0P5BM18; A0A0P5PPT4; A0A0P5XGU4; A0A0P5ECS0; A0A0N8AKQ7; A0A0P5YRE9	1	1671	1.8	High	0.00329	0.1196
	FALSE	High	IVTVLLNK		0.152253	0.00358207	9	145	2	A0A0P5BM18; A0A0P5M269; A0A0P5PPT4; A0A0P5XGU4; A0A0P5ECS0; A0A0N8AKQ7; A0A0P5UT23; A0A0P5YRE9; A0A0P5NEQ8	0	899.592	2.75	High	0.00329	0.1251
	FALSE	High	SATPTGYSK		0.141787	0.00358207	11	127	1	A0A0P5Z193; E9HZI6; A0A0P5BM18; A0A0P5F867; A0A0N8DZB7; A0A0P5I5B7; A0A0P5LYR5; A0A0P5ECS0; A0A0N8AKQ7; A0A0P5NG35; E9GVW7	0	911.447	1.56	High	0.00329	0.1154
	FALSE	High	EIVGTLLMPIFFNKAEETEVR	1xOxidation [M8]	0.162767	0.00527855	21	163	1	A0A0P5Z193; E9HZI6; A0A0P5BM18; A0A0P6FZL4; A0A0P4YK27; A0A0P5IAS3; A0A0P5GUJ5; A0A0P5I5B7; A0A0P5LYR5; A0A0P5PJQ0; A0A0P5XGU4; A0A0P6FTA8; A0A0P5ECS0; A0A0N8AKQ7; A0A0P5KLT7; A0A0P5UT23; A0A0P5NG35; E9GVW7; A0A0P6EEN9; A0A0P5NEQ8; A0A0N8DYK4	1	2452.28	1.46	High	0.004515	0.1346
	FALSE	High	LSYVEEPK		0.184315	0.00607653	11	108	2	A0A0P5Z193; A0A0P5XPE2; A0A0P5BM18; A0A0P4YK27; A0A0P5I5B7; A0A0P5PJQ0; A0A0P5XGU4; A0A0P5ECS0; A0A0P5KLT7; A0A0P5UT23; A0A0N8DYK4	0	964.499	1.97	High	0.005091	0.1552
	FALSE	High	LVGKPGLR		0.185741	0.00607653	19	162	1	A0A0P5Z193; E9HZI6; A0A0P5BM18; A0A0P5S327; A0A0P5GUJ5; A0A0P5I5B7; A0A0P5PPT4; A0A0P5PJQ0; A0A0P5XGU4; A0A0P6FTA8; A0A0P5ECS0; A0A0N8AKQ7; A0A0P5KLT7; A0A0P5UT23; A0A0P5NG35; E9GVW7; A0A0P6EEN9; A0A0P5NEQ8; A0A0N8DYK4	0	839.546	1.78	High	0.005091	0.1564
	FALSE	High	ISHSDTVR		0.202835	0.00767163	9	128	1	A0A0P5Z193; A0A0P5BM18; A0A0N8DZB7; A0A0P4YK27; A0A0P5I5B7; A0A0P5LYR5; A0A0P5ECS0; A0A0N8AKQ7; A0A0P5NG35	0	914.469	1.1	High	0.006261	0.1731
	FALSE	High	VTDLTGPR		0.19825	0.00767163	10	120	1	E9HZI6; A0A0P5BM18; A0A0P5M269; A0A0P5PPT4; A0A0P5XGU4; A0A0P5ECS0; A0A0N8AKQ7; A0A0P5UT23; A0A0P5YRE9; E9GVW7	0	858.468	2.15	High	0.006261	0.1686
FALSE	High	Master Protein	A0A0P4YK27	Copper-zinc cu-zn superoxide dismutase OS=Daphnia magna PE=4 SV=1	0	490.811	44.6602	76	150	2	1	1545	173.2	7.01	463.02	76
	Checked	Confidence	Sequence	Modifications	Qvality PEP	Qvality q-value	# Protein Groups	# Proteins	# PSMs	Master Protein Accessions	# Missed Cleavages	Theo. MH+ [Da]	XCorr Sequest HT	Confidence Sequest HT	Percolator q-Value Sequest HT	Percolator PEP Sequest HT
	FALSE	High	LMVETPFSR		0.0294129	0	10	125	1	A0A0P5Z193; A0A0P5XPE2; A0A0P5BM18; A0A0P4YK27; A0A0P5GUJ5; A0A0P6FTA8; A0A0P5ECS0; A0A0P5UT23; A0A0P5NEQ8; A0A0N8DYK4	0	1079.56	2.44	High	0	0.01941
	FALSE	High	HLGMDFVFVER	1xOxidation [M4]	0.000872352	0	12	112	2	A0A0P5I0U9; A0A0P5BM18; A0A0P4YK27; A0A0P5GUJ5; A0A0P5PPT4; A0A0P5PJQ0; A0A0P5XGU4; A0A0P5ECS0; A0A0N8AKQ7; A0A0P5UT23; A0A0P5NEQ8; A0A0N8DYK4	0	1365.66	3.36	High	0	0.01263
	FALSE	High	HLGMDFVFVER		0.000610115	0	12	112	1	A0A0P5I0U9; A0A0P5BM18; A0A0P4YK27; A0A0P5GUJ5; A0A0P5PPT4; A0A0P5PJQ0; A0A0P5XGU4; A0A0P5ECS0; A0A0N8AKQ7; A0A0P5UT23; A0A0P5NEQ8; A0A0N8DYK4	0	1349.67	2.91	High	0	0.0002464
	FALSE	High	KIEQGILNGEQSWENVR	1xDeamidated [N8]	1.14401e-05	0	5	65	2	A0A0P5Z193; A0A0P4YK27; A0A0P5ECS0; A0A0N8AKQ7; A0A0P5J4J3	1	2001	5.69	High	0	2.818e-06
	FALSE	High	VETVAIGKEEPLWIVNFK		1.6249e-06	0	7	120	2	A0A0P5Z193; A0A0P5BM18; A0A0P4YK27; A0A0P5LYR5; A0A0P5ECS0; A0A0N8AKQ7; A0A0P5NG35	1	2072.14	6.5	High	0	3.134e-07
	FALSE	High	DESSIISPELEK		0.00455817	0	18	150	1	A0A0P5Z193; E9HZI6; A0A0P5XPE2; A0A0P5BM18; A0A0P5S327; A0A0P4YK27; A0A0P5IAS3; A0A0P5GUJ5; A0A0P5I5B7; A0A0P5PJQ0; A0A0P5XGU4; A0A0P6FTA8; A0A0P5ECS0; A0A0P5UT23; E9GVW7; A0A0P6EEN9; A0A0P5NEQ8; A0A0N8DYK4	0	1346.67	3.2	High	0	0.002369
	FALSE	High	IQTTWETLGDKLR		0.00029714	0	15	156	4	A0A0P5Z193; A0A0P5BM18; A0A0P4YK27; A0A0P5GUJ5; A0A0P5I5B7; A0A0P5PPT4; A0A0P5PJQ0; A0A0P5XGU4; A0A0P6FTA8; A0A0P5ECS0; A0A0N8AKQ7; A0A0P5KLT7; A0A0P5NG35; A0A0P5NEQ8; A0A0N8DYK4	1	1560.84	3.5	High	0	0.0001097
	FALSE	High	KEIVGTLLMPIFFNK	1xOxidation [M9]	1.70782e-05	0	22	169	2	A0A0P5Z193; E9HZI6; A0A0P5BM18; A0A0P5S327; A0A0P6FZL4; A0A0P4YK27; A0A0P5IAS3; A0A0P5GUJ5; A0A0P5I5B7; A0A0P5LYR5; A0A0P5PJQ0; A0A0P5XGU4; A0A0P6FTA8; A0A0P5ECS0; A0A0N8AKQ7; A0A0P5KLT7; A0A0P5UT23; A0A0P5NG35; E9GVW7; A0A0P6EEN9; A0A0P5NEQ8; A0A0N8DYK4	1	1765.99	4.02	High	0	4.421e-06
	FALSE	High	KEIVGTLLMPIFFNK		0.000437875	0	22	169	1	A0A0P5Z193; E9HZI6; A0A0P5BM18; A0A0P5S327; A0A0P6FZL4; A0A0P4YK27; A0A0P5IAS3; A0A0P5GUJ5; A0A0P5I5B7; A0A0P5LYR5; A0A0P5PJQ0; A0A0P5XGU4; A0A0P6FTA8; A0A0P5ECS0; A0A0N8AKQ7; A0A0P5KLT7; A0A0P5UT23; A0A0P5NG35; E9GVW7; A0A0P6EEN9; A0A0P5NEQ8; A0A0N8DYK4	1	1750	2.73	High	0	0.0001698
	FALSE	High	GVIYGLEPGR		0.0200387	0	6	67	1	A0A0P5Z193; E9HZI6; A0A0P4YK27; A0A0P5ECS0; A0A0N8AKQ7; A0A0P5J4J3	0	1060.58	2.4	High	0	0.01258
	FALSE	High	IRGVIYGLEPGR		0.068333	0	6	67	1	A0A0P5Z193; E9HZI6; A0A0P4YK27; A0A0P5ECS0; A0A0N8AKQ7; A0A0P5J4J3	1	1329.76	2.33	High	0	0.05026
	FALSE	High	QREWSLYLDNASSETK		2.87507e-07	0	15	150	2	A0A0P5Z193; A0A0P5BM18; A0A0P5M269; A0A0P4YK27; A0A0P5GUJ5; A0A0P5I5B7; A0A0P5PPT4; A0A0P5PJQ0; A0A0P5XGU4; A0A0P6FTA8; A0A0P5ECS0; A0A0N8AKQ7; A0A0P5KLT7; A0A0P5UT23; A0A0P5YRE9	1	1926.92	5.66	High	0	4.445e-08
	FALSE	High	QREWSLYLDNASSETK	1xDeamidated [N10]	0.00402342	0	15	150	1	A0A0P5Z193; A0A0P5BM18; A0A0P5M269; A0A0P4YK27; A0A0P5GUJ5; A0A0P5I5B7; A0A0P5PPT4; A0A0P5PJQ0; A0A0P5XGU4; A0A0P6FTA8; A0A0P5ECS0; A0A0N8AKQ7; A0A0P5KLT7; A0A0P5UT23; A0A0P5YRE9	1	1927.9	3.59	High	0	0.002064
	FALSE	High	NVNSPMIMEVEPEILKK	1xOxidation [M6]	5.21259e-05	0	11	99	2	E9HZI6; A0A0P5BM18; A0A0P5F867; A0A0P4YK27; A0A0P5PJQ0; A0A0P5ECS0; A0A0N8AKQ7; A0A0P5UT23; E9GVW7; A0A0P6EEN9; A0A0P5NEQ8	1	1987.02	4.21	High	0	1.553e-05
	FALSE	High	IQTTWETLGDK		0.00864996	0	15	156	2	A0A0P5Z193; A0A0P5BM18; A0A0P4YK27; A0A0P5GUJ5; A0A0P5I5B7; A0A0P5PPT4; A0A0P5PJQ0; A0A0P5XGU4; A0A0P6FTA8; A0A0P5ECS0; A0A0N8AKQ7; A0A0P5KLT7; A0A0P5NG35; A0A0P5NEQ8; A0A0N8DYK4	0	1291.65	2.58	High	0	0.004898
	FALSE	High	TDVSLISSLVSLFEESPR		0.000293324	0	5	68	2	E9HZI6; A0A0P4YK27; A0A0P5ECS0; A0A0P4X0S3; A0A0N8AKQ7	0	1979.03	2.73	High	0	0.0001083
	FALSE	High	SILGHAIVIHQLPDDR		1.23332e-06	0	5	70	3	A0A0P5Z193; A0A0P4YK27; A0A0P5ECS0; A0A0P4X0S3; A0A0N8AKQ7	0	1783.98	5.59	High	0	2.294e-07
	FALSE	High	NVNSPMIMEVEPEILKK		2.95169e-05	0	11	99	1	E9HZI6; A0A0P5BM18; A0A0P5F867; A0A0P4YK27; A0A0P5PJQ0; A0A0P5ECS0; A0A0N8AKQ7; A0A0P5UT23; E9GVW7; A0A0P6EEN9; A0A0P5NEQ8	1	1971.03	3.71	High	0	8.154e-06
	FALSE	High	NVNSPMIMEVEPEILKK	2xOxidation [M6; M8]	0.000562166	0	11	99	2	E9HZI6; A0A0P5BM18; A0A0P5F867; A0A0P4YK27; A0A0P5PJQ0; A0A0P5ECS0; A0A0N8AKQ7; A0A0P5UT23; E9GVW7; A0A0P6EEN9; A0A0P5NEQ8	1	2003.02	4.46	High	0	0.0002463
	FALSE	High	ISDFTPAILLSETKR		7.1084e-05	0	4	63	1	A0A0P5Z193; A0A0P5BM18; A0A0P4YK27; A0A0P5ECS0	1	1690.94	2.74	High	0	2.197e-05
	FALSE	High	ILPVFNYNSNQGLR		0.000517985	0	8	110	2	E9HZI6; A0A0P5BM18; A0A0N8DZB7; A0A0P4YK27; A0A0P5LYR5; A0A0P5ECS0; A0A0N8AKQ7; E9GVW7	0	1634.86	3.27	High	0	0.004836
	FALSE	High	ILPVFNYNSNQGLR	1xDeamidated [N6]	0.00189406	0	8	110	2	E9HZI6; A0A0P5BM18; A0A0N8DZB7; A0A0P4YK27; A0A0P5LYR5; A0A0P5ECS0; A0A0N8AKQ7; E9GVW7	0	1635.85	2.56	High	0	0.0008834
	FALSE	High	ILPVFNYNSNQGLR	2xDeamidated [N6; N8]	0.0136322	0	8	110	1	E9HZI6; A0A0P5BM18; A0A0N8DZB7; A0A0P4YK27; A0A0P5LYR5; A0A0P5ECS0; A0A0N8AKQ7; E9GVW7	0	1636.83	1.96	High	0	0.00815
	FALSE	High	AYPTTGVDMEWAAALPGR		4.3208e-06	0	9	118	1	A0A0P5Z193; A0A0P5XPE2; A0A0P5BM18; A0A0P4YK27; A0A0P5PJQ0; A0A0P6FTA8; A0A0P5ECS0; A0A0P5UT23; A0A0N8DYK4	0	1905.92	4.21	High	0	9.415e-07
	FALSE	High	AYPTTGVDMEWAAALPGR	1xOxidation [M9]	5.4526e-06	0	9	118	3	A0A0P5Z193; A0A0P5XPE2; A0A0P5BM18; A0A0P4YK27; A0A0P5PJQ0; A0A0P6FTA8; A0A0P5ECS0; A0A0P5UT23; A0A0N8DYK4	0	1921.91	3.95	High	0	1.219e-06
	FALSE	High	VETVAIGKEEPLWIVNFKR		1.07193e-07	0	7	120	2	A0A0P5Z193; A0A0P5BM18; A0A0P4YK27; A0A0P5LYR5; A0A0P5ECS0; A0A0N8AKQ7; A0A0P5NG35	2	2228.24	5.87	High	0	1.464e-08
	FALSE	High	EEPLWIVNFKR		0.00737852	0	9	123	1	A0A0P5Z193; E9HZI6; A0A0P5BM18; A0A0P4YK27; A0A0P5LYR5; A0A0P5ECS0; A0A0N8AKQ7; A0A0P5NG35; E9GVW7	1	1430.78	2.3	High	0	0.004085
	FALSE	High	KISDFTPAILLSETK		8.22611e-07	0	8	109	2	A0A0P5Z193; A0A0P5I0U9; A0A0P5BM18; A0A0P4YK27; A0A0P5PPT4; A0A0P6FTA8; A0A0P5ECS0; A0A0N8AKQ7	1	1662.93	4.65	High	0	1.453e-07
	FALSE	High	AIFALSTLAVQK		0.003613	0	12	127	2	A0A0P5Z193; A0A0P5BM18; A0A0P6FZL4; A0A0P4YK27; A0A0P5GUJ5; A0A0P5LYR5; A0A0P5XGU4; A0A0P6FTA8; A0A0P5ECS0; A0A0N8AKQ7; A0A0P5NEQ8; A0A0N8DYK4	0	1261.75	3.19	High	0	0.001831
	FALSE	High	AIFALSTLAVQK	1xDeamidated [Q11]	0.00546083	0	12	127	1	A0A0P5Z193; A0A0P5BM18; A0A0P6FZL4; A0A0P4YK27; A0A0P5GUJ5; A0A0P5LYR5; A0A0P5XGU4; A0A0P6FTA8; A0A0P5ECS0; A0A0N8AKQ7; A0A0P5NEQ8; A0A0N8DYK4	0	1262.74	2.41	High	0	0.002913
	FALSE	High	FVSGKVETVAIGKEEPLWIVNFK	1xDeamidated [N21]	0.0384285	0	7	119	1	A0A0P5Z193; A0A0P5BM18; A0A0P4YK27; A0A0P5LYR5; A0A0P5ECS0; A0A0N8AKQ7; A0A0P5NG35	2	2591.41	1.58	High	0	0.02627
	FALSE	High	IEQGILNGEQSWENVR	2xDeamidated [Q3; Q10]	0.0660939	0	5	66	1	A0A0P5Z193; A0A0P4YK27; A0A0P5ECS0; A0A0N8AKQ7; A0A0P5J4J3	0	1873.89	1.78	High	0	0.04854
	FALSE	High	NVNSPMIMEVEPEILK	1xOxidation [M]	0.00325839	0	11	99	2	E9HZI6; A0A0P5BM18; A0A0P5F867; A0A0P4YK27; A0A0P5PJQ0; A0A0P5ECS0; A0A0N8AKQ7; A0A0P5UT23; E9GVW7; A0A0P6EEN9; A0A0P5NEQ8	0	1858.93	3.37	High	0	0.00163
	FALSE	High	NVNSPMIMEVEPEILK	2xOxidation [M6; M8]	2.51675e-05	0	11	99	1	E9HZI6; A0A0P5BM18; A0A0P5F867; A0A0P4YK27; A0A0P5PJQ0; A0A0P5ECS0; A0A0N8AKQ7; A0A0P5UT23; E9GVW7; A0A0P6EEN9; A0A0P5NEQ8	0	1874.92	3.33	High	0	6.82e-06
	FALSE	High	IEQGILNGEQSWENVR		6.17824e-06	0	5	66	1	A0A0P5Z193; A0A0P4YK27; A0A0P5ECS0; A0A0N8AKQ7; A0A0P5J4J3	0	1871.92	3.85	High	0	1.407e-06
	FALSE	High	AKAIFALSTLAVQK		0.0317518	0	12	127	1	A0A0P5Z193; A0A0P5BM18; A0A0P6FZL4; A0A0P4YK27; A0A0P5GUJ5; A0A0P5LYR5; A0A0P5XGU4; A0A0P6FTA8; A0A0P5ECS0; A0A0N8AKQ7; A0A0P5NEQ8; A0A0N8DYK4	1	1460.88	2.09	High	0	0.02115
	FALSE	High	VPSNLNLEGVERPTNVDSLTLETAAPTRK		1.43129e-05	0	3	66	1	A0A0P4YK27; A0A0P5ECS0; A0A0N8AKQ7	1	3121.65	5.42	High	0	3.616e-06
	FALSE	High	VPSNLNLEGVERPTNVDSLTLETAAPTRK	1xDeamidated [N15]	1.46179e-07	0	3	66	1	A0A0P4YK27; A0A0P5ECS0; A0A0N8AKQ7	1	3122.63	4.49	High	0	2.085e-08
	FALSE	High	AIFALSTLAVQKK		9.08705e-05	0	12	127	1	A0A0P5Z193; A0A0P5BM18; A0A0P6FZL4; A0A0P4YK27; A0A0P5GUJ5; A0A0P5LYR5; A0A0P5XGU4; A0A0P6FTA8; A0A0P5ECS0; A0A0N8AKQ7; A0A0P5NEQ8; A0A0N8DYK4	1	1389.85	3.44	High	0	2.892e-05
	FALSE	High	AIFALSTLAVQKK	1xDeamidated [Q11]	0.000401727	0	12	127	2	A0A0P5Z193; A0A0P5BM18; A0A0P6FZL4; A0A0P4YK27; A0A0P5GUJ5; A0A0P5LYR5; A0A0P5XGU4; A0A0P6FTA8; A0A0P5ECS0; A0A0N8AKQ7; A0A0P5NEQ8; A0A0N8DYK4	1	1390.83	3.67	High	0	0.0001541
	FALSE	High	KISDFTPAILLSETKR		2.86271e-07	0	4	63	2	A0A0P5Z193; A0A0P5BM18; A0A0P4YK27; A0A0P5ECS0	2	1819.03	6.16	High	0	4.44e-08
	FALSE	High	VPSNLNLEGVERPTNVDSLTLETAAPTR		1.67788e-07	0	3	66	2	A0A0P4YK27; A0A0P5ECS0; A0A0N8AKQ7	0	2993.55	5.71	High	0	2.428e-08
	FALSE	High	EWSLYLDNASSETK		5.73083e-05	0	16	152	1	A0A0P5Z193; A0A0P5BM18; A0A0P5M269; A0A0P4YK27; A0A0P5GUJ5; A0A0P5I5B7; A0A0P5PPT4; A0A0P5PJQ0; A0A0P5XGU4; A0A0P6FTA8; A0A0P5ECS0; A0A0N8AKQ7; A0A0P5KLT7; A0A0P5UT23; A0A0P5YRE9; A0A0N8DYK4	0	1642.76	3.57	High	0	1.721e-05
	FALSE	High	EWSLYLDNASSETK	1xDeamidated [N8]	0.00133051	0	16	152	1	A0A0P5Z193; A0A0P5BM18; A0A0P5M269; A0A0P4YK27; A0A0P5GUJ5; A0A0P5I5B7; A0A0P5PPT4; A0A0P5PJQ0; A0A0P5XGU4; A0A0P6FTA8; A0A0P5ECS0; A0A0N8AKQ7; A0A0P5KLT7; A0A0P5UT23; A0A0P5YRE9; A0A0N8DYK4	0	1643.74	2.49	High	0	0.0005946
	FALSE	High	LLPAPELCQNFPVYEIVK	1xCarbamidomethyl [C8]	0.000149784	0	11	132	2	A0A0P5Z193; E9HZI6; A0A0P5BM18; A0A0N8DZB7; A0A0P4YK27; A0A0P5I5B7; A0A0P5LYR5; A0A0P5ECS0; A0A0N8AKQ7; A0A0P5NG35; E9GVW7	0	2130.13	3.57	High	0	5.079e-05
	FALSE	High	YTSDKINMLR		0.0325714	0	5	50	2	A0A0P4YK27; A0A0P5I5B7; A0A0P5LYR5; A0A0P5KLT7; A0A0P5NG35	1	1240.64	2.79	High	0	0.02176
	FALSE	High	IHEELKIEAR		0.00358203	0	19	168	2	E9HZI6; A0A0P5BM18; A0A0P5S327; A0A0P4YK27; A0A0P5GUJ5; A0A0P5I5B7; A0A0P5PPT4; A0A0P5PJQ0; A0A0P5XGU4; A0A0P6FTA8; A0A0P5ECS0; A0A0N8AKQ7; A0A0P5KLT7; A0A0P5UT23; A0A0P5NG35; E9GVW7; A0A0P6EEN9; A0A0P5NEQ8; A0A0N8DYK4	1	1237.69	3.92	High	0	0.00455
	FALSE	High	YSEVDPGQEVR		0.00347572	0	10	122	2	A0A0P5Z193; E9HZI6; A0A0P5BM18; A0A0N8DZB7; A0A0P4YK27; A0A0P5LYR5; A0A0P5ECS0; A0A0N8AKQ7; A0A0P5NG35; E9GVW7	0	1278.6	3.19	High	0	0.001754
	FALSE	High	IAGEQAVQAISALVPTVETPTK		6.45024e-06	0	8	94	1	A0A0P5BM18; A0A0P4YK27; A0A0P5PJQ0; A0A0P6FTA8; A0A0P5ECS0; A0A0P5UT23; A0A0P5NEQ8; A0A0N8DYK4	0	2223.22	4.13	High	0	1.477e-06
	FALSE	High	RIGSSIVYGMDGK	1xOxidation [M10]	0.00503227	0	13	138	2	A0A0P5Z193; A0A0P5BM18; A0A0P4YK27; A0A0P5GUJ5; A0A0P5PPT4; A0A0P5PJQ0; A0A0P5XGU4; A0A0P5ECS0; A0A0N8AKQ7; A0A0P5KLT7; A0A0P5UT23; A0A0P5YRE9; A0A0P5NEQ8	1	1398.7	2.71	High	0.00329	0.126
	FALSE	High	QFNEDVMEK		0.0663698	0	9	97	1	A0A0P5Z193; E9HZI6; A0A0N8DZB7; A0A0P4YK27; A0A0P5LYR5; A0A0N8AKQ7; A0A0P5J4J3; A0A0P5NG35; E9GVW7	0	1139.5	1.97	High	0	0.04877
	FALSE	High	GKQFNEDVMEK		0.00416434	0	9	97	1	A0A0P5Z193; E9HZI6; A0A0N8DZB7; A0A0P4YK27; A0A0P5LYR5; A0A0N8AKQ7; A0A0P5J4J3; A0A0P5NG35; E9GVW7	1	1324.62	3.35	High	0	0.002148
	FALSE	High	ELLTSLMEFLK	1xOxidation [M7]	0.0208242	0	13	108	1	A0A0P5Z193; A0A0P5BM18; A0A0P4YK27; A0A0P5F3B7; A0A0P5RAR4; A0A0P5PJQ0; A0A0P6FTA8; A0A0P5ECS0; A0A0N8AKQ7; A0A0P5UT23; A0A0P6EEN9; A0A0P5NEQ8; A0A0N8DYK4	0	1339.72	2.72	High	0	0.01313
	FALSE	High	ELLTSLMEFLK		0.0618253	0	13	108	1	A0A0P5Z193; A0A0P5BM18; A0A0P4YK27; A0A0P5F3B7; A0A0P5RAR4; A0A0P5PJQ0; A0A0P6FTA8; A0A0P5ECS0; A0A0N8AKQ7; A0A0P5UT23; A0A0P6EEN9; A0A0P5NEQ8; A0A0N8DYK4	0	1323.72	1.64	High	0	0.04502
	FALSE	High	EIVGTLLMPIFFNK	1xOxidation [M8]	0.000105206	0	22	169	3	A0A0P5Z193; E9HZI6; A0A0P5BM18; A0A0P5S327; A0A0P6FZL4; A0A0P4YK27; A0A0P5IAS3; A0A0P5GUJ5; A0A0P5I5B7; A0A0P5LYR5; A0A0P5PJQ0; A0A0P5XGU4; A0A0P6FTA8; A0A0P5ECS0; A0A0N8AKQ7; A0A0P5KLT7; A0A0P5UT23; A0A0P5NG35; E9GVW7; A0A0P6EEN9; A0A0P5NEQ8; A0A0N8DYK4	0	1637.9	3.87	High	0	3.42e-05
	FALSE	High	EIVGTLLMPIFFNK		0.00626649	0	22	169	2	A0A0P5Z193; E9HZI6; A0A0P5BM18; A0A0P5S327; A0A0P6FZL4; A0A0P4YK27; A0A0P5IAS3; A0A0P5GUJ5; A0A0P5I5B7; A0A0P5LYR5; A0A0P5PJQ0; A0A0P5XGU4; A0A0P6FTA8; A0A0P5ECS0; A0A0N8AKQ7; A0A0P5KLT7; A0A0P5UT23; A0A0P5NG35; E9GVW7; A0A0P6EEN9; A0A0P5NEQ8; A0A0N8DYK4	0	1621.9	1.87	High	0	0.003393
	FALSE	High	LTIEPVDESTAVVALLATK		1.12664e-06	0	7	94	2	A0A0P5Z193; A0A0P4YK27; A0A0P5LYR5; A0A0P5ECS0; A0A0N8AKQ7; A0A0P5J4J3; A0A0P5NG35	0	1970.11	4.79	High	0	4.956e-06
	FALSE	High	LAALTLLFVSNPPQAFWSR		0.0037557	0	19	158	1	A0A0P5Z193; E9HZI6; A0A0P5BM18; A0A0P5S327; A0A0P6FZL4; A0A0P4YK27; A0A0P5GUJ5; A0A0P5I5B7; A0A0P5PJQ0; A0A0P5XGU4; A0A0P6FTA8; A0A0P5ECS0; A0A0N8AKQ7; A0A0P5KLT7; A0A0P5UT23; A0A0P5NG35; E9GVW7; A0A0P6EEN9; A0A0P5NEQ8	0	2131.17	2.48	High	0	0.001914
	FALSE	High	ATGQPELYIYLNFLDNYQR		7.26318e-05	0	21	168	1	A0A0P5Z193; E9HZI6; A0A0P5XPE2; A0A0P5BM18; A0A0P5S327; A0A0P4YK27; A0A0P5IAS3; A0A0P5GUJ5; A0A0P5I5B7; A0A0P5PPT4; A0A0P5PJQ0; A0A0P5XGU4; A0A0P5ECS0; A0A0N8AKQ7; A0A0P5KLT7; A0A0P5UT23; A0A0P5NG35; E9GVW7; A0A0P6EEN9; A0A0P5NEQ8; A0A0N8DYK4	0	2318.15	2.83	High	0	2.246e-05
	FALSE	High	HPHYGAIEGQK		0.0238722	0	3	61	1	A0A0P4YK27; A0A0P5ECS0; A0A0N8AKQ7	0	1236.61	2.3	High	0	0.01534
	FALSE	High	LLSEIISDVESEAYYVDPSSK		0.00014914	0	5	48	1	A0A0P4YK27; A0A0P5I5B7; A0A0P5LYR5; A0A0P5KLT7; A0A0P5NG35	0	2344.14	2.49	High	0	5.054e-05
	FALSE	High	LSYVEEPKENK		0.00320277	0	11	108	4	A0A0P5Z193; A0A0P5XPE2; A0A0P5BM18; A0A0P4YK27; A0A0P5I5B7; A0A0P5PJQ0; A0A0P5XGU4; A0A0P5ECS0; A0A0P5KLT7; A0A0P5UT23; A0A0N8DYK4	1	1335.68	2.92	High	0	0.001599
	FALSE	High	RLSYVEEPKENK		0.00971345	0	11	108	4	A0A0P5Z193; A0A0P5XPE2; A0A0P5BM18; A0A0P4YK27; A0A0P5I5B7; A0A0P5PJQ0; A0A0P5XGU4; A0A0P5ECS0; A0A0P5KLT7; A0A0P5UT23; A0A0N8DYK4	2	1491.78	3.37	High	0	0.005556
	FALSE	High	VANKNPLNREETVR		0.00482037	0	18	159	2	A0A0P5BM18; A0A0P5S327; A0A0P6FZL4; A0A0P4YK27; A0A0P5IAS3; A0A0P5GUJ5; A0A0P5I5B7; A0A0P5PJQ0; A0A0P5XGU4; A0A0P6FTA8; A0A0P5ECS0; A0A0N8AKQ7; A0A0P5KLT7; A0A0P5UT23; A0A0P5NG35; A0A0P6EEN9; A0A0P5NEQ8; A0A0N8DYK4	2	1639.89	2.96	High	0	0.002533
	FALSE	High	VANKNPLNREETVR	1xDeamidated [N]	0.0275941	0	18	159	2	A0A0P5BM18; A0A0P5S327; A0A0P6FZL4; A0A0P4YK27; A0A0P5IAS3; A0A0P5GUJ5; A0A0P5I5B7; A0A0P5PJQ0; A0A0P5XGU4; A0A0P6FTA8; A0A0P5ECS0; A0A0N8AKQ7; A0A0P5KLT7; A0A0P5UT23; A0A0P5NG35; A0A0P6EEN9; A0A0P5NEQ8; A0A0N8DYK4	2	1640.87	2.08	High	0	0.01806
	FALSE	High	IIDQEHLEKPFQVK		2.09114e-05	0	9	122	4	E9HZI6; A0A0P5BM18; A0A0N8DZB7; A0A0P4YK27; A0A0P5LYR5; A0A0P5ECS0; A0A0N8AKQ7; A0A0P5NG35; E9GVW7	0	1723.94	3.97	High	0	5.542e-06
	FALSE	High	HGLHVHAGTTLGDQCDSVGGQFVPAEK	1xCarbamidomethyl [C15]	6.75715e-10	0	5	65	1	A0A0P5Z193; A0A0P4YK27; A0A0P5ECS0; A0A0N8AKQ7; A0A0P5J4J3	0	2817.34	7.38	High	0	4.899e-11
	FALSE	High	HGLHVHAGTTLGDQCDSVGGQFVPAEK	1xCarbamidomethyl [C15]; 1xDeamidated [Q14]	4.56994e-11	0	5	65	1	A0A0P5Z193; A0A0P4YK27; A0A0P5ECS0; A0A0N8AKQ7; A0A0P5J4J3	0	2818.32	5.93	High	0	2.36472e-12
	FALSE	High	SNKDESSIISPELEK		3.41579e-07	0	16	145	2	A0A0P5Z193; A0A0P5XPE2; A0A0P5BM18; A0A0P5S327; A0A0P4YK27; A0A0P5IAS3; A0A0P5GUJ5; A0A0P5I5B7; A0A0P5PJQ0; A0A0P5XGU4; A0A0P6FTA8; A0A0P5ECS0; A0A0P5UT23; A0A0P6EEN9; A0A0P5NEQ8; A0A0N8DYK4	1	1675.84	4.32	High	0	5.409e-08
	FALSE	High	GKQFNEDVMEKYSEVDPGQEVR	1xOxidation [M9]	0.00273117	0	8	94	1	A0A0P5Z193; E9HZI6; A0A0N8DZB7; A0A0P4YK27; A0A0P5LYR5; A0A0N8AKQ7; A0A0P5NG35; E9GVW7	2	2600.19	3.06	High	0	0.001334
	FALSE	High	IIGCTSNEGHFIVQR	1xCarbamidomethyl [C4]	1.19668e-06	0	9	122	2	A0A0P5Z193; A0A0P5BM18; A0A0N8DZB7; A0A0P4YK27; A0A0P5I5B7; A0A0P5LYR5; A0A0P5ECS0; A0A0N8AKQ7; A0A0P5NG35	0	1730.86	4.84	High	0	2.218e-07
	FALSE	High	SLFDTIYGEQIMSQEYVR	1xOxidation [M12]	6.41011e-05	0	10	94	1	A0A0P5I0U9; A0A0P5BM18; A0A0P4YK27; A0A0P5GUJ5; A0A0P5PPT4; A0A0P5PJQ0; A0A0P5ECS0; A0A0N8AKQ7; A0A0P5NEQ8; A0A0N8DYK4	0	2195.03	2.86	High	0	1.952e-05
	FALSE	High	AESEDWEDEALCNLVR	1xCarbamidomethyl [C12]	1.02918e-06	0	16	156	1	A0A0P5Z193; A0A0P5BM18; A0A0P4YK27; A0A0P5IAS3; A0A0P5I5B7; A0A0P5LYR5; A0A0P5PJQ0; A0A0P5XGU4; A0A0P6FTA8; A0A0P5ECS0; A0A0N8AKQ7; A0A0P5KLT7; A0A0P5UT23; A0A0P5NG35; A0A0P5NEQ8; A0A0N8DYK4	0	1935.84	4.34	High	0	1.871e-07
	FALSE	High	QFNEDVMEKYSEVDPGQEVR	1xOxidation [M7]	0.00975524	0	8	94	1	A0A0P5Z193; E9HZI6; A0A0N8DZB7; A0A0P4YK27; A0A0P5LYR5; A0A0N8AKQ7; A0A0P5NG35; E9GVW7	1	2415.08	3.04	High	0	0.005604
	FALSE	High	LAVVQPSVYSK		0.00621283	0	14	125	2	A0A0P5Z193; A0A0P5I0U9; A0A0P5BM18; A0A0P4YK27; A0A0P5GUJ5; A0A0P5PPT4; A0A0P5PJQ0; A0A0P5XGU4; A0A0P6FTA8; A0A0P5ECS0; A0A0N8AKQ7; A0A0P5NEQ8; A0A0N8BQS0; A0A0N8DYK4	0	1190.68	3.16	High	0	0.003369
	FALSE	High	HGLHVHAGTTLGDQCDSVGGQFVPAEKYESER	1xCarbamidomethyl [C15]; 1xDeamidated [Q]	2.74603e-10	0	5	65	3	A0A0P5Z193; A0A0P4YK27; A0A0P5ECS0; A0A0N8AKQ7; A0A0P5J4J3	1	3482.6	7.06	High	0	2.631e-08
	FALSE	High	ISDFTPAILLSETK		4.4637e-05	0	8	109	1	A0A0P5Z193; A0A0P5I0U9; A0A0P5BM18; A0A0P4YK27; A0A0P5PPT4; A0A0P6FTA8; A0A0P5ECS0; A0A0N8AKQ7	0	1534.84	4.06	High	0	1.303e-05
	FALSE	High	IGSSIVYGMDGK	1xOxidation [M9]	0.00385394	0	13	138	1	A0A0P5Z193; A0A0P5BM18; A0A0P4YK27; A0A0P5GUJ5; A0A0P5PPT4; A0A0P5PJQ0; A0A0P5XGU4; A0A0P5ECS0; A0A0N8AKQ7; A0A0P5KLT7; A0A0P5UT23; A0A0P5YRE9; A0A0P5NEQ8	0	1242.6	3.29	High	0	0.001964
	FALSE	High	FKSNKDESSIISPELEK		1.6924e-07	0	16	144	3	A0A0P5Z193; A0A0P5XPE2; A0A0P5BM18; A0A0P5S327; A0A0P4YK27; A0A0P5IAS3; A0A0P5GUJ5; A0A0P5I5B7; A0A0P5PJQ0; A0A0P5XGU4; A0A0P6FTA8; A0A0P5ECS0; A0A0P5UT23; A0A0P6EEN9; A0A0P5NEQ8; A0A0N8DYK4	2	1951	5.15	High	0	2.455e-08
	FALSE	High	ISYVEEPKENKVTFGEK		0.000116666	0	7	67	4	A0A0P5XPE2; A0A0P5BM18; A0A0P4YK27; A0A0P5XGU4; A0A0P5ECS0; A0A0P5UT23; A0A0N8DYK4	2	1997.02	4.03	High	0	4.26e-05
	FALSE	High	LSYVEEPKENKVTFGEK	1xDeamidated [N10]	0.00355133	0	7	67	2	A0A0P5XPE2; A0A0P5BM18; A0A0P4YK27; A0A0P5XGU4; A0A0P5ECS0; A0A0P5UT23; A0A0N8DYK4	2	1998.01	3.06	High	0	0.00179
	FALSE	High	FVSGKVETVAIGK		0.0533949	0	8	126	1	A0A0P5Z193; A0A0P5BM18; A0A0N8DZB7; A0A0P4YK27; A0A0P5LYR5; A0A0P5ECS0; A0A0N8AKQ7; A0A0P5NG35	1	1334.77	1.9	High	0	0.03817
	FALSE	High	FFTINPNTIFR		0.00643025	0	19	164	3	A0A0P5XPE2; A0A0P5BM18; A0A0P5S327; A0A0P4YK27; A0A0P5IAS3; A0A0P5I5B7; A0A0P5PPT4; A0A0P5PJQ0; A0A0P5XGU4; A0A0P6FTA8; A0A0P5ECS0; A0A0N8AKQ7; A0A0P5R4V4; A0A0P5KLT7; A0A0P5UT23; A0A0P5NG35; A0A0P6EEN9; A0A0P5NEQ8; A0A0N8DYK4	0	1369.73	2.68	High	0	0.004597
	FALSE	High	GRLTIEPVDESTAVVALLATK		9.04799e-05	0	6	92	2	A0A0P5Z193; A0A0P4YK27; A0A0P5LYR5; A0A0P5ECS0; A0A0P5J4J3; A0A0P5NG35	1	2183.23	4.52	High	0	2.882e-05
	FALSE	High	EEPLWIVNFK		0.0103152	0	9	124	1	A0A0P5Z193; E9HZI6; A0A0P5BM18; A0A0P4YK27; A0A0P5LYR5; A0A0P5ECS0; A0A0N8AKQ7; A0A0P5NG35; E9GVW7	0	1274.68	2.1	High	0	0.005951
	FALSE	High	KIEQGILNGEQSWENVR		0.0706447	0.000973478	5	65	1	A0A0P5Z193; A0A0P4YK27; A0A0P5ECS0; A0A0N8AKQ7; A0A0P5J4J3	1	2000.02	1.18	High	0.0007147	0.05234
	FALSE	High	ITTALSLSR		0.0858086	0.000973478	17	144	1	A0A0P5Z193; E9HZI6; A0A0P5BM18; A0A0P5F867; A0A0P5S327; A0A0P4YK27; A0A0P5I5B7; A0A0P5LYR5; A0A0P5PJQ0; A0A0P5ECS0; A0A0N8AKQ7; A0A0P5KLT7; A0A0P5NG35; E9GVW7; A0A0P6EEN9; A0A0P5NEQ8; A0A0N8DYK4	0	961.568	2.48	High	0.0007147	0.06514
	FALSE	High	AAMPSTIR		0.104018	0.0018991	1	5	1	A0A0P4YK27	0	846.45	1.83	High	0.001394	0.08117
	FALSE	High	SVGYLGNIK		0.114654	0.0018991	6	70	2	A0A0P5Z193; A0A0P4YK27; A0A0P5ECS0; A0A0P4X0S3; A0A0N8AKQ7; A0A0P5J4J3	0	950.531	2.05	High	0.001394	0.09067
	FALSE	High	QQDSQWESQK		0.115584	0.00283597	17	158	1	A0A0P5I0U9; E9HZI6; A0A0P5BM18; A0A0P5M269; A0A0P4YK27; A0A0P5GUJ5; A0A0P5I5B7; A0A0P5PPT4; A0A0P5PJQ0; A0A0P5XGU4; A0A0P5ECS0; A0A0N8AKQ7; A0A0P5KLT7; A0A0P5UT23; A0A0P5YRE9; E9GVW7; A0A0P5NEQ8	0	1263.56	1.69	High	0.002777	0.09138
	FALSE	High	VETVAIGK		0.135175	0.00358207	8	127	1	A0A0P5Z193; A0A0P5BM18; A0A0N8DZB7; A0A0P4YK27; A0A0P5LYR5; A0A0P5ECS0; A0A0N8AKQ7; A0A0P5NG35	0	816.483	2	High	0.00329	0.1092
	FALSE	High	YTSDKINMLR	1xOxidation [M8]	0.123282	0.00358207	5	50	2	A0A0P4YK27; A0A0P5I5B7; A0A0P5LYR5; A0A0P5KLT7; A0A0P5NG35	1	1256.63	2.34	High	0.00329	0.0984
	FALSE	High	FAIEGDMK		0.149869	0.00358207	16	149	2	A0A0P5Z193; A0A0P5XPE2; A0A0P5BM18; A0A0P4YK27; A0A0P5GUJ5; A0A0P5I5B7; A0A0P5PPT4; A0A0P6FTA8; A0A0P5ECS0; A0A0N8AKQ7; A0A0P5KLT7; A0A0P5UT23; A0A0P5NG35; A0A0P5NEQ8; A0A0N8BQS0; A0A0N8DYK4	0	910.434	2.01	High	0.00329	0.1224
	FALSE	High	QFNEDVMEK	1xOxidation [M7]	0.120342	0.00358207	9	97	1	A0A0P5Z193; E9HZI6; A0A0N8DZB7; A0A0P4YK27; A0A0P5LYR5; A0A0N8AKQ7; A0A0P5J4J3; A0A0P5NG35; E9GVW7	0	1155.5	2.41	High	0.00329	0.09584
	FALSE	High	GKQFNEDVMEK	1xOxidation [M9]	0.122295	0.00358207	9	97	1	A0A0P5Z193; E9HZI6; A0A0N8DZB7; A0A0P4YK27; A0A0P5LYR5; A0A0N8AKQ7; A0A0P5J4J3; A0A0P5NG35; E9GVW7	1	1340.62	1.94	High	0.00329	0.09723
	FALSE	High	EIVGTLLMPIFFNKAEETEVR	1xOxidation [M8]	0.162767	0.00527855	21	163	1	A0A0P5Z193; E9HZI6; A0A0P5BM18; A0A0P6FZL4; A0A0P4YK27; A0A0P5IAS3; A0A0P5GUJ5; A0A0P5I5B7; A0A0P5LYR5; A0A0P5PJQ0; A0A0P5XGU4; A0A0P6FTA8; A0A0P5ECS0; A0A0N8AKQ7; A0A0P5KLT7; A0A0P5UT23; A0A0P5NG35; E9GVW7; A0A0P6EEN9; A0A0P5NEQ8; A0A0N8DYK4	1	2452.28	1.46	High	0.004515	0.1346
	FALSE	High	LSYVEEPK		0.184315	0.00607653	11	108	2	A0A0P5Z193; A0A0P5XPE2; A0A0P5BM18; A0A0P4YK27; A0A0P5I5B7; A0A0P5PJQ0; A0A0P5XGU4; A0A0P5ECS0; A0A0P5KLT7; A0A0P5UT23; A0A0N8DYK4	0	964.499	1.97	High	0.005091	0.1552
	FALSE	High	ISHSDTVR		0.202835	0.00767163	9	128	1	A0A0P5Z193; A0A0P5BM18; A0A0N8DZB7; A0A0P4YK27; A0A0P5I5B7; A0A0P5LYR5; A0A0P5ECS0; A0A0N8AKQ7; A0A0P5NG35	0	914.469	1.1	High	0.006261	0.1731
	FALSE	High	QQASISSPVK	1xDeamidated [Q2]	0.202835	0.00767163	1	1	1	A0A0P4YK27	0	1045.55	2.35	High	0.006261	0.1731
FALSE	High	Master Protein	A0A0P5Z193	Copper-zinc cu-zn superoxide dismutase OS=Daphnia magna PE=4 SV=1	0	414.278	43.0779	80	135	3	1	1618	181.7	6.64	412.47	80
	Checked	Confidence	Sequence	Modifications	Qvality PEP	Qvality q-value	# Protein Groups	# Proteins	# PSMs	Master Protein Accessions	# Missed Cleavages	Theo. MH+ [Da]	XCorr Sequest HT	Confidence Sequest HT	Percolator q-Value Sequest HT	Percolator PEP Sequest HT
	FALSE	High	LMVETPFSR		0.0294129	0	10	125	1	A0A0P5Z193; A0A0P5XPE2; A0A0P5BM18; A0A0P4YK27; A0A0P5GUJ5; A0A0P6FTA8; A0A0P5ECS0; A0A0P5UT23; A0A0P5NEQ8; A0A0N8DYK4	0	1079.56	2.44	High	0	0.01941
	FALSE	High	KIEQGILNGEQSWENVR	1xDeamidated [N8]	1.14401e-05	0	5	65	2	A0A0P5Z193; A0A0P4YK27; A0A0P5ECS0; A0A0N8AKQ7; A0A0P5J4J3	1	2001	5.69	High	0	2.818e-06
	FALSE	High	VETVAIGKEEPLWIVNFK		1.6249e-06	0	7	120	2	A0A0P5Z193; A0A0P5BM18; A0A0P4YK27; A0A0P5LYR5; A0A0P5ECS0; A0A0N8AKQ7; A0A0P5NG35	1	2072.14	6.5	High	0	3.134e-07
	FALSE	High	DESSIISPELEK		0.00455817	0	18	150	1	A0A0P5Z193; E9HZI6; A0A0P5XPE2; A0A0P5BM18; A0A0P5S327; A0A0P4YK27; A0A0P5IAS3; A0A0P5GUJ5; A0A0P5I5B7; A0A0P5PJQ0; A0A0P5XGU4; A0A0P6FTA8; A0A0P5ECS0; A0A0P5UT23; E9GVW7; A0A0P6EEN9; A0A0P5NEQ8; A0A0N8DYK4	0	1346.67	3.2	High	0	0.002369
	FALSE	High	IQTTWETLGDKLR		0.00029714	0	15	156	4	A0A0P5Z193; A0A0P5BM18; A0A0P4YK27; A0A0P5GUJ5; A0A0P5I5B7; A0A0P5PPT4; A0A0P5PJQ0; A0A0P5XGU4; A0A0P6FTA8; A0A0P5ECS0; A0A0N8AKQ7; A0A0P5KLT7; A0A0P5NG35; A0A0P5NEQ8; A0A0N8DYK4	1	1560.84	3.5	High	0	0.0001097
	FALSE	High	KEIVGTLLMPIFFNK	1xOxidation [M9]	1.70782e-05	0	22	169	2	A0A0P5Z193; E9HZI6; A0A0P5BM18; A0A0P5S327; A0A0P6FZL4; A0A0P4YK27; A0A0P5IAS3; A0A0P5GUJ5; A0A0P5I5B7; A0A0P5LYR5; A0A0P5PJQ0; A0A0P5XGU4; A0A0P6FTA8; A0A0P5ECS0; A0A0N8AKQ7; A0A0P5KLT7; A0A0P5UT23; A0A0P5NG35; E9GVW7; A0A0P6EEN9; A0A0P5NEQ8; A0A0N8DYK4	1	1765.99	4.02	High	0	4.421e-06
	FALSE	High	KEIVGTLLMPIFFNK		0.000437875	0	22	169	1	A0A0P5Z193; E9HZI6; A0A0P5BM18; A0A0P5S327; A0A0P6FZL4; A0A0P4YK27; A0A0P5IAS3; A0A0P5GUJ5; A0A0P5I5B7; A0A0P5LYR5; A0A0P5PJQ0; A0A0P5XGU4; A0A0P6FTA8; A0A0P5ECS0; A0A0N8AKQ7; A0A0P5KLT7; A0A0P5UT23; A0A0P5NG35; E9GVW7; A0A0P6EEN9; A0A0P5NEQ8; A0A0N8DYK4	1	1750	2.73	High	0	0.0001698
	FALSE	High	GVIYGLEPGR		0.0200387	0	6	67	1	A0A0P5Z193; E9HZI6; A0A0P4YK27; A0A0P5ECS0; A0A0N8AKQ7; A0A0P5J4J3	0	1060.58	2.4	High	0	0.01258
	FALSE	High	IRGVIYGLEPGR		0.068333	0	6	67	1	A0A0P5Z193; E9HZI6; A0A0P4YK27; A0A0P5ECS0; A0A0N8AKQ7; A0A0P5J4J3	1	1329.76	2.33	High	0	0.05026
	FALSE	High	LPVEVVEAEPK		0.000783288	0	8	131	2	A0A0P5Z193; A0A0P5BM18; A0A0N8DZB7; A0A0P5I5B7; A0A0P5LYR5; A0A0P5ECS0; A0A0N8AKQ7; A0A0P5NG35	0	1209.67	3.23	High	0	0.000327
	FALSE	High	QREWSLYLDNASSETK		2.87507e-07	0	15	150	2	A0A0P5Z193; A0A0P5BM18; A0A0P5M269; A0A0P4YK27; A0A0P5GUJ5; A0A0P5I5B7; A0A0P5PPT4; A0A0P5PJQ0; A0A0P5XGU4; A0A0P6FTA8; A0A0P5ECS0; A0A0N8AKQ7; A0A0P5KLT7; A0A0P5UT23; A0A0P5YRE9	1	1926.92	5.66	High	0	4.445e-08
	FALSE	High	QREWSLYLDNASSETK	1xDeamidated [N10]	0.00402342	0	15	150	1	A0A0P5Z193; A0A0P5BM18; A0A0P5M269; A0A0P4YK27; A0A0P5GUJ5; A0A0P5I5B7; A0A0P5PPT4; A0A0P5PJQ0; A0A0P5XGU4; A0A0P6FTA8; A0A0P5ECS0; A0A0N8AKQ7; A0A0P5KLT7; A0A0P5UT23; A0A0P5YRE9	1	1927.9	3.59	High	0	0.002064
	FALSE	High	IQTTWETLGDK		0.00864996	0	15	156	2	A0A0P5Z193; A0A0P5BM18; A0A0P4YK27; A0A0P5GUJ5; A0A0P5I5B7; A0A0P5PPT4; A0A0P5PJQ0; A0A0P5XGU4; A0A0P6FTA8; A0A0P5ECS0; A0A0N8AKQ7; A0A0P5KLT7; A0A0P5NG35; A0A0P5NEQ8; A0A0N8DYK4	0	1291.65	2.58	High	0	0.004898
	FALSE	High	SILGHAIVIHQLPDDR		1.23332e-06	0	5	70	3	A0A0P5Z193; A0A0P4YK27; A0A0P5ECS0; A0A0P4X0S3; A0A0N8AKQ7	0	1783.98	5.59	High	0	2.294e-07
	FALSE	High	ITVATTWTR		0.0397517	0	9	144	2	A0A0P5Z193; A0A0P5BM18; A0A0P5PPT4; A0A0P5XGU4; A0A0P5ECS0; A0A0N8AKQ7; A0A0P5KLT7; A0A0P5YRE9; A0A0P5NEQ8	0	1048.58	2.72	High	0	0.02732
	FALSE	High	ISDFTPAILLSETKR		7.1084e-05	0	4	63	1	A0A0P5Z193; A0A0P5BM18; A0A0P4YK27; A0A0P5ECS0	1	1690.94	2.74	High	0	2.197e-05
	FALSE	High	SLFDTVYGEQIMNK	1xOxidation [M12]	0.0161803	0	7	56	1	A0A0P5Z193; A0A0P5M269; A0A0P5I5B7; A0A0P5XGU4; A0A0P5KLT7; A0A0P5UT23; A0A0P5YRE9	0	1660.79	2.18	High	0	0.009907
	FALSE	High	AYPTTGVDMEWAAALPGR		4.3208e-06	0	9	118	1	A0A0P5Z193; A0A0P5XPE2; A0A0P5BM18; A0A0P4YK27; A0A0P5PJQ0; A0A0P6FTA8; A0A0P5ECS0; A0A0P5UT23; A0A0N8DYK4	0	1905.92	4.21	High	0	9.415e-07
	FALSE	High	AYPTTGVDMEWAAALPGR	1xOxidation [M9]	5.4526e-06	0	9	118	3	A0A0P5Z193; A0A0P5XPE2; A0A0P5BM18; A0A0P4YK27; A0A0P5PJQ0; A0A0P6FTA8; A0A0P5ECS0; A0A0P5UT23; A0A0N8DYK4	0	1921.91	3.95	High	0	1.219e-06
	FALSE	High	VETVAIGKEEPLWIVNFKR		1.07193e-07	0	7	120	2	A0A0P5Z193; A0A0P5BM18; A0A0P4YK27; A0A0P5LYR5; A0A0P5ECS0; A0A0N8AKQ7; A0A0P5NG35	2	2228.24	5.87	High	0	1.464e-08
	FALSE	High	EEPLWIVNFKR		0.00737852	0	9	123	1	A0A0P5Z193; E9HZI6; A0A0P5BM18; A0A0P4YK27; A0A0P5LYR5; A0A0P5ECS0; A0A0N8AKQ7; A0A0P5NG35; E9GVW7	1	1430.78	2.3	High	0	0.004085
	FALSE	High	LVVKPFSYETEATEGLTVQHLTLR		5.89228e-06	0	5	89	1	A0A0P5Z193; A0A0P5BM18; A0A0N8DZB7; A0A0P5ECS0; A0A0N8AKQ7	0	2731.47	4.58	High	0	1.331e-06
	FALSE	High	KISDFTPAILLSETK		8.22611e-07	0	8	109	2	A0A0P5Z193; A0A0P5I0U9; A0A0P5BM18; A0A0P4YK27; A0A0P5PPT4; A0A0P6FTA8; A0A0P5ECS0; A0A0N8AKQ7	1	1662.93	4.65	High	0	1.453e-07
	FALSE	High	AIFALSTLAVQK		0.003613	0	12	127	2	A0A0P5Z193; A0A0P5BM18; A0A0P6FZL4; A0A0P4YK27; A0A0P5GUJ5; A0A0P5LYR5; A0A0P5XGU4; A0A0P6FTA8; A0A0P5ECS0; A0A0N8AKQ7; A0A0P5NEQ8; A0A0N8DYK4	0	1261.75	3.19	High	0	0.001831
	FALSE	High	AIFALSTLAVQK	1xDeamidated [Q11]	0.00546083	0	12	127	1	A0A0P5Z193; A0A0P5BM18; A0A0P6FZL4; A0A0P4YK27; A0A0P5GUJ5; A0A0P5LYR5; A0A0P5XGU4; A0A0P6FTA8; A0A0P5ECS0; A0A0N8AKQ7; A0A0P5NEQ8; A0A0N8DYK4	0	1262.74	2.41	High	0	0.002913
	FALSE	High	FVSGKVETVAIGKEEPLWIVNFK	1xDeamidated [N21]	0.0384285	0	7	119	1	A0A0P5Z193; A0A0P5BM18; A0A0P4YK27; A0A0P5LYR5; A0A0P5ECS0; A0A0N8AKQ7; A0A0P5NG35	2	2591.41	1.58	High	0	0.02627
	FALSE	High	IEQGILNGEQSWENVR	2xDeamidated [Q3; Q10]	0.0660939	0	5	66	1	A0A0P5Z193; A0A0P4YK27; A0A0P5ECS0; A0A0N8AKQ7; A0A0P5J4J3	0	1873.89	1.78	High	0	0.04854
	FALSE	High	IEQGILNGEQSWENVR		6.17824e-06	0	5	66	1	A0A0P5Z193; A0A0P4YK27; A0A0P5ECS0; A0A0N8AKQ7; A0A0P5J4J3	0	1871.92	3.85	High	0	1.407e-06
	FALSE	High	AKAIFALSTLAVQK		0.0317518	0	12	127	1	A0A0P5Z193; A0A0P5BM18; A0A0P6FZL4; A0A0P4YK27; A0A0P5GUJ5; A0A0P5LYR5; A0A0P5XGU4; A0A0P6FTA8; A0A0P5ECS0; A0A0N8AKQ7; A0A0P5NEQ8; A0A0N8DYK4	1	1460.88	2.09	High	0	0.02115
	FALSE	High	AIFALSTLAVQKK		9.08705e-05	0	12	127	1	A0A0P5Z193; A0A0P5BM18; A0A0P6FZL4; A0A0P4YK27; A0A0P5GUJ5; A0A0P5LYR5; A0A0P5XGU4; A0A0P6FTA8; A0A0P5ECS0; A0A0N8AKQ7; A0A0P5NEQ8; A0A0N8DYK4	1	1389.85	3.44	High	0	2.892e-05
	FALSE	High	AIFALSTLAVQKK	1xDeamidated [Q11]	0.000401727	0	12	127	2	A0A0P5Z193; A0A0P5BM18; A0A0P6FZL4; A0A0P4YK27; A0A0P5GUJ5; A0A0P5LYR5; A0A0P5XGU4; A0A0P6FTA8; A0A0P5ECS0; A0A0N8AKQ7; A0A0P5NEQ8; A0A0N8DYK4	1	1390.83	3.67	High	0	0.0001541
	FALSE	High	KISDFTPAILLSETKR		2.86271e-07	0	4	63	2	A0A0P5Z193; A0A0P5BM18; A0A0P4YK27; A0A0P5ECS0	2	1819.03	6.16	High	0	4.44e-08
	FALSE	High	SLSVAMGPWFTK	1xOxidation [M6]	0.012674	0	1	3	1	A0A0P5Z193	0	1339.67	2.7	High	0	0.007531
	FALSE	High	ISSDVHIYQTLAYSYDDDYK		0.000351504	0	9	125	1	A0A0P5Z193; A0A0P5BM18; A0A0P5F867; A0A0N8DZB7; A0A0P5I5B7; A0A0P5LYR5; A0A0P5ECS0; A0A0N8AKQ7; A0A0P5NG35	0	2396.09	3.68	High	0	0.000133
	FALSE	High	EWSLYLDNASSETK		5.73083e-05	0	16	152	1	A0A0P5Z193; A0A0P5BM18; A0A0P5M269; A0A0P4YK27; A0A0P5GUJ5; A0A0P5I5B7; A0A0P5PPT4; A0A0P5PJQ0; A0A0P5XGU4; A0A0P6FTA8; A0A0P5ECS0; A0A0N8AKQ7; A0A0P5KLT7; A0A0P5UT23; A0A0P5YRE9; A0A0N8DYK4	0	1642.76	3.57	High	0	1.721e-05
	FALSE	High	EWSLYLDNASSETK	1xDeamidated [N8]	0.00133051	0	16	152	1	A0A0P5Z193; A0A0P5BM18; A0A0P5M269; A0A0P4YK27; A0A0P5GUJ5; A0A0P5I5B7; A0A0P5PPT4; A0A0P5PJQ0; A0A0P5XGU4; A0A0P6FTA8; A0A0P5ECS0; A0A0N8AKQ7; A0A0P5KLT7; A0A0P5UT23; A0A0P5YRE9; A0A0N8DYK4	0	1643.74	2.49	High	0	0.0005946
	FALSE	High	LLPAPELCQNFPVYEIVK	1xCarbamidomethyl [C8]	0.000149784	0	11	132	2	A0A0P5Z193; E9HZI6; A0A0P5BM18; A0A0N8DZB7; A0A0P4YK27; A0A0P5I5B7; A0A0P5LYR5; A0A0P5ECS0; A0A0N8AKQ7; A0A0P5NG35; E9GVW7	0	2130.13	3.57	High	0	5.079e-05
	FALSE	High	LTLETAAPTRK		0.00626649	0	2	21	2	A0A0P5Z193; A0A0P5NG35	1	1200.69	2.99	High	0	0.003399
	FALSE	High	HSVVPFTTVRK		0.0297906	0	13	119	1	A0A0P5Z193; A0A0P5I0U9; A0A0P5BM18; A0A0P5GUJ5; A0A0P5PPT4; A0A0P5PJQ0; A0A0P5XGU4; A0A0P5ECS0; A0A0N8AKQ7; A0A0P5UT23; A0A0P5NEQ8; A0A0N8BQS0; A0A0N8DYK4	1	1270.73	3.18	High	0	0.01973
	FALSE	High	YSEVDPGQEVR		0.00347572	0	10	122	2	A0A0P5Z193; E9HZI6; A0A0P5BM18; A0A0N8DZB7; A0A0P4YK27; A0A0P5LYR5; A0A0P5ECS0; A0A0N8AKQ7; A0A0P5NG35; E9GVW7	0	1278.6	3.19	High	0	0.001754
	FALSE	High	MMEQASISSPVK	2xOxidation [M1; M2]	0.0076695	0	1	5	1	A0A0P5Z193	0	1339.62	2.31	High	0	0.004269
	FALSE	High	RIGSSIVYGMDGK	1xOxidation [M10]	0.00503227	0	13	138	2	A0A0P5Z193; A0A0P5BM18; A0A0P4YK27; A0A0P5GUJ5; A0A0P5PPT4; A0A0P5PJQ0; A0A0P5XGU4; A0A0P5ECS0; A0A0N8AKQ7; A0A0P5KLT7; A0A0P5UT23; A0A0P5YRE9; A0A0P5NEQ8	1	1398.7	2.71	High	0.00329	0.126
	FALSE	High	QFNEDVMEK		0.0663698	0	9	97	1	A0A0P5Z193; E9HZI6; A0A0N8DZB7; A0A0P4YK27; A0A0P5LYR5; A0A0N8AKQ7; A0A0P5J4J3; A0A0P5NG35; E9GVW7	0	1139.5	1.97	High	0	0.04877
	FALSE	High	DWFGTLAFAAMPSTIR	1xOxidation [M11]	0.000513541	0	10	114	2	A0A0P5Z193; A0A0P5BM18; A0A0P5GUJ5; A0A0P5PPT4; A0A0P5XGU4; A0A0P6FTA8; A0A0P5ECS0; A0A0N8AKQ7; A0A0P5UT23; A0A0P5NEQ8	0	1799.88	3.09	High	0	0.0002032
	FALSE	High	GKQFNEDVMEK		0.00416434	0	9	97	1	A0A0P5Z193; E9HZI6; A0A0N8DZB7; A0A0P4YK27; A0A0P5LYR5; A0A0N8AKQ7; A0A0P5J4J3; A0A0P5NG35; E9GVW7	1	1324.62	3.35	High	0	0.002148
	FALSE	High	ELLTSLMEFLK	1xOxidation [M7]	0.0208242	0	13	108	1	A0A0P5Z193; A0A0P5BM18; A0A0P4YK27; A0A0P5F3B7; A0A0P5RAR4; A0A0P5PJQ0; A0A0P6FTA8; A0A0P5ECS0; A0A0N8AKQ7; A0A0P5UT23; A0A0P6EEN9; A0A0P5NEQ8; A0A0N8DYK4	0	1339.72	2.72	High	0	0.01313
	FALSE	High	ELLTSLMEFLK		0.0618253	0	13	108	1	A0A0P5Z193; A0A0P5BM18; A0A0P4YK27; A0A0P5F3B7; A0A0P5RAR4; A0A0P5PJQ0; A0A0P6FTA8; A0A0P5ECS0; A0A0N8AKQ7; A0A0P5UT23; A0A0P6EEN9; A0A0P5NEQ8; A0A0N8DYK4	0	1323.72	1.64	High	0	0.04502
	FALSE	High	EIVGTLLMPIFFNK	1xOxidation [M8]	0.000105206	0	22	169	3	A0A0P5Z193; E9HZI6; A0A0P5BM18; A0A0P5S327; A0A0P6FZL4; A0A0P4YK27; A0A0P5IAS3; A0A0P5GUJ5; A0A0P5I5B7; A0A0P5LYR5; A0A0P5PJQ0; A0A0P5XGU4; A0A0P6FTA8; A0A0P5ECS0; A0A0N8AKQ7; A0A0P5KLT7; A0A0P5UT23; A0A0P5NG35; E9GVW7; A0A0P6EEN9; A0A0P5NEQ8; A0A0N8DYK4	0	1637.9	3.87	High	0	3.42e-05
	FALSE	High	EIVGTLLMPIFFNK		0.00626649	0	22	169	2	A0A0P5Z193; E9HZI6; A0A0P5BM18; A0A0P5S327; A0A0P6FZL4; A0A0P4YK27; A0A0P5IAS3; A0A0P5GUJ5; A0A0P5I5B7; A0A0P5LYR5; A0A0P5PJQ0; A0A0P5XGU4; A0A0P6FTA8; A0A0P5ECS0; A0A0N8AKQ7; A0A0P5KLT7; A0A0P5UT23; A0A0P5NG35; E9GVW7; A0A0P6EEN9; A0A0P5NEQ8; A0A0N8DYK4	0	1621.9	1.87	High	0	0.003393
	FALSE	High	LTIEPVDESTAVVALLATK		1.12664e-06	0	7	94	2	A0A0P5Z193; A0A0P4YK27; A0A0P5LYR5; A0A0P5ECS0; A0A0N8AKQ7; A0A0P5J4J3; A0A0P5NG35	0	1970.11	4.79	High	0	4.956e-06
	FALSE	High	LAALTLLFVSNPPQAFWSR		0.0037557	0	19	158	1	A0A0P5Z193; E9HZI6; A0A0P5BM18; A0A0P5S327; A0A0P6FZL4; A0A0P4YK27; A0A0P5GUJ5; A0A0P5I5B7; A0A0P5PJQ0; A0A0P5XGU4; A0A0P6FTA8; A0A0P5ECS0; A0A0N8AKQ7; A0A0P5KLT7; A0A0P5UT23; A0A0P5NG35; E9GVW7; A0A0P6EEN9; A0A0P5NEQ8	0	2131.17	2.48	High	0	0.001914
	FALSE	High	ATGQPELYIYLNFLDNYQR		7.26318e-05	0	21	168	1	A0A0P5Z193; E9HZI6; A0A0P5XPE2; A0A0P5BM18; A0A0P5S327; A0A0P4YK27; A0A0P5IAS3; A0A0P5GUJ5; A0A0P5I5B7; A0A0P5PPT4; A0A0P5PJQ0; A0A0P5XGU4; A0A0P5ECS0; A0A0N8AKQ7; A0A0P5KLT7; A0A0P5UT23; A0A0P5NG35; E9GVW7; A0A0P6EEN9; A0A0P5NEQ8; A0A0N8DYK4	0	2318.15	2.83	High	0	2.246e-05
	FALSE	High	LLSEIISDVESEAYYVDPSTK		3.49175e-05	0	6	88	6	A0A0P5Z193; A0A0P5BM18; A0A0P5PJQ0; A0A0P5ECS0; A0A0N8AKQ7; A0A0P5NEQ8	0	2358.16	3.86	High	0	9.862e-06
	FALSE	High	LSYVEEPKENK		0.00320277	0	11	108	4	A0A0P5Z193; A0A0P5XPE2; A0A0P5BM18; A0A0P4YK27; A0A0P5I5B7; A0A0P5PJQ0; A0A0P5XGU4; A0A0P5ECS0; A0A0P5KLT7; A0A0P5UT23; A0A0N8DYK4	1	1335.68	2.92	High	0	0.001599
	FALSE	High	RLSYVEEPKENK		0.00971345	0	11	108	4	A0A0P5Z193; A0A0P5XPE2; A0A0P5BM18; A0A0P4YK27; A0A0P5I5B7; A0A0P5PJQ0; A0A0P5XGU4; A0A0P5ECS0; A0A0P5KLT7; A0A0P5UT23; A0A0N8DYK4	2	1491.78	3.37	High	0	0.005556
	FALSE	High	GMSDECIAAR	1xCarbamidomethyl [C6]; 1xOxidation [M2]	0.00498916	0	6	83	1	A0A0P5Z193; A0A0P5BM18; A0A0P5M269; A0A0P5XGU4; A0A0P5ECS0; A0A0P5YRE9	0	1125.47	2.3	High	0	0.002629
	FALSE	High	HGLHVHAGTTLGDQCDSVGGQFVPAEK	1xCarbamidomethyl [C15]	6.75715e-10	0	5	65	1	A0A0P5Z193; A0A0P4YK27; A0A0P5ECS0; A0A0N8AKQ7; A0A0P5J4J3	0	2817.34	7.38	High	0	4.899e-11
	FALSE	High	HGLHVHAGTTLGDQCDSVGGQFVPAEK	1xCarbamidomethyl [C15]; 1xDeamidated [Q14]	4.56994e-11	0	5	65	1	A0A0P5Z193; A0A0P4YK27; A0A0P5ECS0; A0A0N8AKQ7; A0A0P5J4J3	0	2818.32	5.93	High	0	2.36472e-12
	FALSE	High	HSVVPFTTVR		0.0110959	0	13	120	1	A0A0P5Z193; A0A0P5I0U9; A0A0P5BM18; A0A0P5GUJ5; A0A0P5PPT4; A0A0P5PJQ0; A0A0P5XGU4; A0A0P5ECS0; A0A0N8AKQ7; A0A0P5UT23; A0A0P5NEQ8; A0A0N8BQS0; A0A0N8DYK4	0	1142.63	2.74	High	0	0.006459
	FALSE	High	SNKDESSIISPELEK		3.41579e-07	0	16	145	2	A0A0P5Z193; A0A0P5XPE2; A0A0P5BM18; A0A0P5S327; A0A0P4YK27; A0A0P5IAS3; A0A0P5GUJ5; A0A0P5I5B7; A0A0P5PJQ0; A0A0P5XGU4; A0A0P6FTA8; A0A0P5ECS0; A0A0P5UT23; A0A0P6EEN9; A0A0P5NEQ8; A0A0N8DYK4	1	1675.84	4.32	High	0	5.409e-08
	FALSE	High	GKQFNEDVMEKYSEVDPGQEVR	1xOxidation [M9]	0.00273117	0	8	94	1	A0A0P5Z193; E9HZI6; A0A0N8DZB7; A0A0P4YK27; A0A0P5LYR5; A0A0N8AKQ7; A0A0P5NG35; E9GVW7	2	2600.19	3.06	High	0	0.001334
	FALSE	High	IIGCTSNEGHFIVQR	1xCarbamidomethyl [C4]	1.19668e-06	0	9	122	2	A0A0P5Z193; A0A0P5BM18; A0A0N8DZB7; A0A0P4YK27; A0A0P5I5B7; A0A0P5LYR5; A0A0P5ECS0; A0A0N8AKQ7; A0A0P5NG35	0	1730.86	4.84	High	0	2.218e-07
	FALSE	High	AESEDWEDEALCNLVR	1xCarbamidomethyl [C12]	1.02918e-06	0	16	156	1	A0A0P5Z193; A0A0P5BM18; A0A0P4YK27; A0A0P5IAS3; A0A0P5I5B7; A0A0P5LYR5; A0A0P5PJQ0; A0A0P5XGU4; A0A0P6FTA8; A0A0P5ECS0; A0A0N8AKQ7; A0A0P5KLT7; A0A0P5UT23; A0A0P5NG35; A0A0P5NEQ8; A0A0N8DYK4	0	1935.84	4.34	High	0	1.871e-07
	FALSE	High	QFNEDVMEKYSEVDPGQEVR	1xOxidation [M7]	0.00975524	0	8	94	1	A0A0P5Z193; E9HZI6; A0A0N8DZB7; A0A0P4YK27; A0A0P5LYR5; A0A0N8AKQ7; A0A0P5NG35; E9GVW7	1	2415.08	3.04	High	0	0.005604
	FALSE	High	LAVVQPSVYSK		0.00621283	0	14	125	2	A0A0P5Z193; A0A0P5I0U9; A0A0P5BM18; A0A0P4YK27; A0A0P5GUJ5; A0A0P5PPT4; A0A0P5PJQ0; A0A0P5XGU4; A0A0P6FTA8; A0A0P5ECS0; A0A0N8AKQ7; A0A0P5NEQ8; A0A0N8BQS0; A0A0N8DYK4	0	1190.68	3.16	High	0	0.003369
	FALSE	High	HGLHVHAGTTLGDQCDSVGGQFVPAEKYESER	1xCarbamidomethyl [C15]; 1xDeamidated [Q]	2.74603e-10	0	5	65	3	A0A0P5Z193; A0A0P4YK27; A0A0P5ECS0; A0A0N8AKQ7; A0A0P5J4J3	1	3482.6	7.06	High	0	2.631e-08
	FALSE	High	ISDFTPAILLSETK		4.4637e-05	0	8	109	1	A0A0P5Z193; A0A0P5I0U9; A0A0P5BM18; A0A0P4YK27; A0A0P5PPT4; A0A0P6FTA8; A0A0P5ECS0; A0A0N8AKQ7	0	1534.84	4.06	High	0	1.303e-05
	FALSE	High	IGSSIVYGMDGK	1xOxidation [M9]	0.00385394	0	13	138	1	A0A0P5Z193; A0A0P5BM18; A0A0P4YK27; A0A0P5GUJ5; A0A0P5PPT4; A0A0P5PJQ0; A0A0P5XGU4; A0A0P5ECS0; A0A0N8AKQ7; A0A0P5KLT7; A0A0P5UT23; A0A0P5YRE9; A0A0P5NEQ8	0	1242.6	3.29	High	0	0.001964
	FALSE	High	FKSNKDESSIISPELEK		1.6924e-07	0	16	144	3	A0A0P5Z193; A0A0P5XPE2; A0A0P5BM18; A0A0P5S327; A0A0P4YK27; A0A0P5IAS3; A0A0P5GUJ5; A0A0P5I5B7; A0A0P5PJQ0; A0A0P5XGU4; A0A0P6FTA8; A0A0P5ECS0; A0A0P5UT23; A0A0P6EEN9; A0A0P5NEQ8; A0A0N8DYK4	2	1951	5.15	High	0	2.455e-08
	FALSE	High	AVMTIKYNEMPAVVR	2xOxidation [M3; M10]	0.0313497	0	11	151	1	A0A0P5Z193; A0A0P5BM18; A0A0P5M269; A0A0P5PPT4; A0A0P5XGU4; A0A0P5ECS0; A0A0N8AKQ7; A0A0P5KLT7; A0A0P5UT23; A0A0P5YRE9; A0A0P5NEQ8	1	1753.9	2.67	High	0	0.02089
	FALSE	High	FVSGKVETVAIGK		0.0533949	0	8	126	1	A0A0P5Z193; A0A0P5BM18; A0A0N8DZB7; A0A0P4YK27; A0A0P5LYR5; A0A0P5ECS0; A0A0N8AKQ7; A0A0P5NG35	1	1334.77	1.9	High	0	0.03817
	FALSE	High	SEEDISPSLR		0.0253406	0	9	129	1	A0A0P5Z193; A0A0P5BM18; A0A0P5PPT4; A0A0P5XGU4; A0A0P5ECS0; A0A0N8AKQ7; A0A0P5KLT7; A0A0P5YRE9; A0A0P5NEQ8	0	1132.55	2.73	High	0	0.01641
	FALSE	High	GRLTIEPVDESTAVVALLATK		9.04799e-05	0	6	92	2	A0A0P5Z193; A0A0P4YK27; A0A0P5LYR5; A0A0P5ECS0; A0A0P5J4J3; A0A0P5NG35	1	2183.23	4.52	High	0	2.882e-05
	FALSE	High	ENAGKWEINFHK		0.0153698	0	14	121	1	A0A0P5Z193; A0A0P5XPE2; A0A0P5BM18; A0A0P5S327; A0A0P5IAS3; A0A0P5GUJ5; A0A0P5PJQ0; A0A0P6FTA8; A0A0P5ECS0; A0A0P5UT23; A0A0P6EEN9; A0A0P5NEQ8; A0A0N8BQS0; A0A0N8DYK4	1	1472.73	3.02	High	0	0.009346
	FALSE	High	EEPLWIVNFK		0.0103152	0	9	124	1	A0A0P5Z193; E9HZI6; A0A0P5BM18; A0A0P4YK27; A0A0P5LYR5; A0A0P5ECS0; A0A0N8AKQ7; A0A0P5NG35; E9GVW7	0	1274.68	2.1	High	0	0.005951
	FALSE	High	LMEISIDSK		0.0556828	0	17	161	1	A0A0P5Z193; A0A0P5XPE2; A0A0P5BM18; A0A0P5S327; A0A0P5GUJ5; A0A0P5I5B7; A0A0P5PPT4; A0A0P5PJQ0; A0A0P5XGU4; A0A0P6FTA8; A0A0P5ECS0; A0A0N8AKQ7; A0A0P5KLT7; A0A0P5UT23; A0A0P5NG35; A0A0P6EEN9; A0A0P5NEQ8	0	1035.54	2.39	High	0	0.03997
	FALSE	High	LMEISIDSK	1xOxidation [M2]	0.0476639	0	17	161	1	A0A0P5Z193; A0A0P5XPE2; A0A0P5BM18; A0A0P5S327; A0A0P5GUJ5; A0A0P5I5B7; A0A0P5PPT4; A0A0P5PJQ0; A0A0P5XGU4; A0A0P6FTA8; A0A0P5ECS0; A0A0N8AKQ7; A0A0P5KLT7; A0A0P5UT23; A0A0P5NG35; A0A0P6EEN9; A0A0P5NEQ8	0	1051.53	2.43	High	0	0.03344
	FALSE	High	YNEMPAVVR		0.0851047	0.000973478	11	152	1	A0A0P5Z193; A0A0P5BM18; A0A0P5M269; A0A0P5PPT4; A0A0P5XGU4; A0A0P5ECS0; A0A0N8AKQ7; A0A0P5KLT7; A0A0P5UT23; A0A0P5YRE9; A0A0P5NEQ8	0	1078.53	2.45	High	0.0007147	0.06469
	FALSE	High	NLNSPMIMEVEPEILKK	2xDeamidated [N1; N3]; 2xOxidation [M6; M8]	0.0736398	0.000973478	1	3	1	A0A0P5Z193	1	2019	2.44	High	0.0007147	0.05472
	FALSE	High	KIEQGILNGEQSWENVR		0.0706447	0.000973478	5	65	1	A0A0P5Z193; A0A0P4YK27; A0A0P5ECS0; A0A0N8AKQ7; A0A0P5J4J3	1	2000.02	1.18	High	0.0007147	0.05234
	FALSE	High	ITTALSLSR		0.0858086	0.000973478	17	144	1	A0A0P5Z193; E9HZI6; A0A0P5BM18; A0A0P5F867; A0A0P5S327; A0A0P4YK27; A0A0P5I5B7; A0A0P5LYR5; A0A0P5PJQ0; A0A0P5ECS0; A0A0N8AKQ7; A0A0P5KLT7; A0A0P5NG35; E9GVW7; A0A0P6EEN9; A0A0P5NEQ8; A0A0N8DYK4	0	961.568	2.48	High	0.0007147	0.06514
	FALSE	High	YWPLLDSFAR		0.0783607	0.000973478	11	116	2	A0A0P5Z193; A0A0P5BM18; A0A0P5S327; A0A0P5IAS3; A0A0P5PJQ0; A0A0P6FTA8; A0A0P5ECS0; A0A0P5UT23; A0A0P6EEN9; A0A0P5NEQ8; A0A0N8BQS0	0	1267.65	1.84	High	0.003911	0.1302
	FALSE	High	YNEMPAVVR	1xOxidation [M4]	0.0721274	0.000973478	11	152	1	A0A0P5Z193; A0A0P5BM18; A0A0P5M269; A0A0P5PPT4; A0A0P5XGU4; A0A0P5ECS0; A0A0N8AKQ7; A0A0P5KLT7; A0A0P5UT23; A0A0P5YRE9; A0A0P5NEQ8	0	1094.53	2.47	High	0.0007147	0.05362
	FALSE	High	KITVATTWTR		0.0751824	0.000973478	9	142	2	A0A0P5Z193; A0A0P5BM18; A0A0P5PPT4; A0A0P5XGU4; A0A0P5ECS0; A0A0N8AKQ7; A0A0P5KLT7; A0A0P5YRE9; A0A0P5NEQ8	1	1176.67	3.33	High	0.008045	0.1851
	FALSE	High	LTLETAAPTR		0.0780372	0.000973478	2	21	1	A0A0P5Z193; A0A0P5NG35	0	1072.6	2.88	High	0.0007147	0.05846
	FALSE	High	SVGYLGNIK		0.114654	0.0018991	6	70	2	A0A0P5Z193; A0A0P4YK27; A0A0P5ECS0; A0A0P4X0S3; A0A0N8AKQ7; A0A0P5J4J3	0	950.531	2.05	High	0.001394	0.09067
	FALSE	High	VETVAIGK		0.135175	0.00358207	8	127	1	A0A0P5Z193; A0A0P5BM18; A0A0N8DZB7; A0A0P4YK27; A0A0P5LYR5; A0A0P5ECS0; A0A0N8AKQ7; A0A0P5NG35	0	816.483	2	High	0.00329	0.1092
	FALSE	High	FAIEGDMK		0.149869	0.00358207	16	149	2	A0A0P5Z193; A0A0P5XPE2; A0A0P5BM18; A0A0P4YK27; A0A0P5GUJ5; A0A0P5I5B7; A0A0P5PPT4; A0A0P6FTA8; A0A0P5ECS0; A0A0N8AKQ7; A0A0P5KLT7; A0A0P5UT23; A0A0P5NG35; A0A0P5NEQ8; A0A0N8BQS0; A0A0N8DYK4	0	910.434	2.01	High	0.00329	0.1224
	FALSE	High	QFNEDVMEK	1xOxidation [M7]	0.120342	0.00358207	9	97	1	A0A0P5Z193; E9HZI6; A0A0N8DZB7; A0A0P4YK27; A0A0P5LYR5; A0A0N8AKQ7; A0A0P5J4J3; A0A0P5NG35; E9GVW7	0	1155.5	2.41	High	0.00329	0.09584
	FALSE	High	GKQFNEDVMEK	1xOxidation [M9]	0.122295	0.00358207	9	97	1	A0A0P5Z193; E9HZI6; A0A0N8DZB7; A0A0P4YK27; A0A0P5LYR5; A0A0N8AKQ7; A0A0P5J4J3; A0A0P5NG35; E9GVW7	1	1340.62	1.94	High	0.00329	0.09723
	FALSE	High	SLSVAMGPWFTK		0.152854	0.00358207	1	3	1	A0A0P5Z193	0	1323.68	1.86	High	0.00329	0.1257
	FALSE	High	SATPTGYSK		0.141787	0.00358207	11	127	1	A0A0P5Z193; E9HZI6; A0A0P5BM18; A0A0P5F867; A0A0N8DZB7; A0A0P5I5B7; A0A0P5LYR5; A0A0P5ECS0; A0A0N8AKQ7; A0A0P5NG35; E9GVW7	0	911.447	1.56	High	0.00329	0.1154
	FALSE	High	EIVGTLLMPIFFNKAEETEVR	1xOxidation [M8]	0.162767	0.00527855	21	163	1	A0A0P5Z193; E9HZI6; A0A0P5BM18; A0A0P6FZL4; A0A0P4YK27; A0A0P5IAS3; A0A0P5GUJ5; A0A0P5I5B7; A0A0P5LYR5; A0A0P5PJQ0; A0A0P5XGU4; A0A0P6FTA8; A0A0P5ECS0; A0A0N8AKQ7; A0A0P5KLT7; A0A0P5UT23; A0A0P5NG35; E9GVW7; A0A0P6EEN9; A0A0P5NEQ8; A0A0N8DYK4	1	2452.28	1.46	High	0.004515	0.1346
	FALSE	High	LSYVEEPK		0.184315	0.00607653	11	108	2	A0A0P5Z193; A0A0P5XPE2; A0A0P5BM18; A0A0P4YK27; A0A0P5I5B7; A0A0P5PJQ0; A0A0P5XGU4; A0A0P5ECS0; A0A0P5KLT7; A0A0P5UT23; A0A0N8DYK4	0	964.499	1.97	High	0.005091	0.1552
	FALSE	High	LVGKPGLR		0.185741	0.00607653	19	162	1	A0A0P5Z193; E9HZI6; A0A0P5BM18; A0A0P5S327; A0A0P5GUJ5; A0A0P5I5B7; A0A0P5PPT4; A0A0P5PJQ0; A0A0P5XGU4; A0A0P6FTA8; A0A0P5ECS0; A0A0N8AKQ7; A0A0P5KLT7; A0A0P5UT23; A0A0P5NG35; E9GVW7; A0A0P6EEN9; A0A0P5NEQ8; A0A0N8DYK4	0	839.546	1.78	High	0.005091	0.1564
	FALSE	High	ISHSDTVR		0.202835	0.00767163	9	128	1	A0A0P5Z193; A0A0P5BM18; A0A0N8DZB7; A0A0P4YK27; A0A0P5I5B7; A0A0P5LYR5; A0A0P5ECS0; A0A0N8AKQ7; A0A0P5NG35	0	914.469	1.1	High	0.006261	0.1731
FALSE	High	Master Protein	A0A0P6IJ43	Apolipophorins OS=Daphnia magna PE=4 SV=1	0	400.52	38.9342	111	147	1	1	3190	355.6	9.04	413.45	111
	Checked	Confidence	Sequence	Modifications	Qvality PEP	Qvality q-value	# Protein Groups	# Proteins	# PSMs	Master Protein Accessions	# Missed Cleavages	Theo. MH+ [Da]	XCorr Sequest HT	Confidence Sequest HT	Percolator q-Value Sequest HT	Percolator PEP Sequest HT
	FALSE	High	DACTFELSPFYAGR	1xCarbamidomethyl [C3]	0.00244192	0	3	17	1	A0A0P6IJ43; E9FVG7; A0A0N8AAE1	0	1633.73	3.28	High	0	0.001174
	FALSE	High	LDMDINLIR	1xOxidation [M3]	0.0644609	0	2	37	1	A0A0P6IJ43; A0A0N8AAE1	0	1118.59	2.47	High	0	0.04706
	FALSE	High	LLAVALPAK		0.0545272	0	3	21	1	A0A0P6IJ43; E9FVG7; A0A0N8AAE1	0	895.598	2.21	High	0	0.03906
	FALSE	High	FVDGELALVIAPK		0.000323878	0	2	34	1	A0A0P6IJ43; A0A0N8AAE1	0	1371.79	3.28	High	0	0.0001211
	FALSE	High	LLEAYLGPDGVFDK		0.000524723	0	2	33	1	A0A0P6IJ43; A0A0N8AAE1	0	1536.79	3.06	High	0	0.0002083
	FALSE	High	LNGYASLIGSK	1xDeamidated [N2]	0.0129487	0	3	21	1	A0A0P6IJ43; E9FVG7; A0A0N8AAE1	0	1123.6	2.67	High	0	0.007682
	FALSE	High	DKPSGIKLDAFLR		0.000824843	0	2	38	1	A0A0P6IJ43; A0A0N8AAE1	1	1459.83	3.55	High	0	0.000346
	FALSE	High	TEVTSSVSLISTTNAGVAAK		2.5048e-07	0	1	16	1	A0A0P6IJ43	0	1936.02	5.66	High	0	3.814e-08
	FALSE	High	AIILEGGFGHEIGR		6.13981e-05	0	2	32	2	A0A0P6IJ43; A0A0N8AAE1	0	1468.79	4.51	High	0	1.865e-05
	FALSE	High	AIENVIETLTER		0.00309435	0	2	23	1	A0A0P6IJ43; A0A0N8AAE1	0	1387.74	3.55	High	0	0.001538
	FALSE	High	IEEITEQMGEKSDIVEAIEK	1xOxidation [M8]	0.000123387	0	2	21	2	A0A0P6IJ43; A0A0N8AAE1	1	2307.13	3.37	High	0	4.096e-05
	FALSE	High	SEGSLVVMWSSPSQR	1xOxidation [M8]	0.00170073	0	3	34	1	A0A0P6IJ43; E9FVG7; A0A0N8AAE1	0	1665.79	3.03	High	0	0.0007816
	FALSE	High	TAENVLLAGANLK		0.000332359	0	3	27	2	A0A0P6IJ43; E9FVG7; A0A0N8AAE1	0	1313.74	4.25	High	0	0.0001247
	FALSE	High	SEGSLVVMWSSPSQR		0.00204672	0	3	34	1	A0A0P6IJ43; E9FVG7; A0A0N8AAE1	0	1649.8	3.22	High	0	0.0009649
	FALSE	High	LAYLTLGSPAK		0.00930517	0	2	24	1	A0A0P6IJ43; A0A0N8AAE1	0	1133.66	2.79	High	0	0.0053
	FALSE	High	VFGSEIGMYAYR		0.00209126	0	2	35	1	A0A0P6IJ43; A0A0N8AAE1	0	1392.66	2.16	High	0	0.0009856
	FALSE	High	VFGSEIGMYAYR	1xOxidation [M8]	0.00202044	0	2	35	1	A0A0P6IJ43; A0A0N8AAE1	0	1408.66	3.08	High	0	0.00095
	FALSE	High	IYEVDVVAGLSEDKAK		3.20347e-05	0	2	29	2	A0A0P6IJ43; A0A0N8AAE1	1	1735.91	3.87	High	0	2.316e-05
	FALSE	High	IAMVSSYDITSISNFDISEK	1xOxidation [M3]	0.00600274	0	2	32	1	A0A0P6IJ43; A0A0N8AAE1	0	2236.07	2.22	High	0	0.003234
	FALSE	High	TFSLVDTGR		0.0407733	0	2	34	1	A0A0P6IJ43; A0A0N8AAE1	0	995.516	2.14	High	0	0.02803
	FALSE	High	AESKLDMDINLIR	1xOxidation [M7]	0.011288	0	2	37	2	A0A0P6IJ43; A0A0N8AAE1	1	1533.79	3.64	High	0	0.00658
	FALSE	High	ITGAALEIVR		0.00550801	0	3	22	1	A0A0P6IJ43; E9FVG7; A0A0N8AAE1	0	1042.63	2.99	High	0	0.002932
	FALSE	High	GLLTSAPTVTVK		0.0151736	0	2	38	1	A0A0P6IJ43; A0A0N8AAE1	0	1186.7	3.31	High	0	0.009213
	FALSE	High	VFSVAFNGK	1xDeamidated [N7]	0.0397517	0	2	34	1	A0A0P6IJ43; A0A0N8AAE1	0	969.504	2.04	High	0	0.02729
	FALSE	High	SKITLIDFK		0.065819	0	2	35	1	A0A0P6IJ43; A0A0N8AAE1	1	1064.64	2.91	High	0	0.04835
	FALSE	High	LQQGSTVEVKLDLPK		0.000415813	0	2	33	1	A0A0P6IJ43; A0A0N8AAE1	1	1654.94	3.22	High	0	0.0001607
	FALSE	High	CDVVKDACTFELSPFYAGR	2xCarbamidomethyl [C1; C8]	0.000328091	0	2	16	1	A0A0P6IJ43; A0A0N8AAE1	1	2235.02	3	High	0	0.0001228
	FALSE	High	SVIFTDGADQVEIKDEQVFINNK		1.46811e-07	0	2	19	1	A0A0P6IJ43; A0A0N8AAE1	1	2609.31	4.78	High	0	2.088e-08
	FALSE	High	DMISFVNSWK		0.0313497	0	3	18	1	A0A0P6IJ43; E9FVG7; A0A0N8AAE1	0	1226.59	2.21	High	0	0.02091
	FALSE	High	DMISFVNSWK	1xOxidation [M2]	0.0397517	0	3	18	1	A0A0P6IJ43; E9FVG7; A0A0N8AAE1	0	1242.58	2.4	High	0	0.02731
	FALSE	High	IEWDGQPQIVLDGK		0.0118843	0	2	36	1	A0A0P6IJ43; A0A0N8AAE1	0	1597.82	1.85	High	0	0.00698
	FALSE	High	VTSFLMTFDTPGSK	1xOxidation [M6]	0.000483484	0	2	36	1	A0A0P6IJ43; A0A0N8AAE1	0	1546.75	3.13	High	0	0.0001902
	FALSE	High	IYEVDVVAGLSEDK		0.000868602	0	2	29	1	A0A0P6IJ43; A0A0N8AAE1	0	1536.78	2.66	High	0	0.0003669
	FALSE	High	SFDLSGGSCQYLLAR	1xCarbamidomethyl [C9]	1.92678e-05	0	3	20	1	A0A0P6IJ43; E9FVG7; A0A0N8AAE1	0	1673.8	3.17	High	0	5.067e-06
	FALSE	High	SVIFTDGADQVEIKDEQVFINNK	1xDeamidated [Q10]	0.0127832	0	2	19	1	A0A0P6IJ43; A0A0N8AAE1	1	2610.29	1.84	High	0	0.007575
	FALSE	High	KTVAQLLEELSR		0.0525055	0	2	22	1	A0A0P6IJ43; A0A0N8AAE1	1	1386.8	1.77	High	0	0.03743
	FALSE	High	DSEFGLEIYTPK		0.00621283	0	2	21	1	A0A0P6IJ43; A0A0N8AAE1	0	1398.68	2.57	High	0	0.003358
	FALSE	High	APWGNLAVEAEMVNQADIK	1xOxidation [M12]	0.00461738	0	2	33	1	A0A0P6IJ43; A0A0N8AAE1	0	2072.01	1.98	High	0	0.002407
	FALSE	High	IDSNSFSVSPVLEIQPGTK		0.000274968	0	3	34	1	A0A0P6IJ43; E9FVG7; A0A0N8AAE1	0	2018.04	3.17	High	0	0.0001007
	FALSE	High	DNLLNILEGKNEDAEVR		0.000599692	0	2	25	1	A0A0P6IJ43; A0A0N8AAE1	1	1941.99	2.61	High	0	0.0002417
	FALSE	High	FLGDTTSGSLNVAWDADRDASK		0.00811012	0	2	36	1	A0A0P6IJ43; A0A0N8AAE1	1	2326.09	1.96	High	0	0.004537
	FALSE	High	VDWGTGTFTVSGTTK		2.05541e-05	0	2	26	1	A0A0P6IJ43; A0A0N8AAE1	0	1556.76	3.3	High	0	5.433e-06
	FALSE	High	KSVIFTDGADQVEIKDEQVFINNK		5.04344e-08	0	2	18	1	A0A0P6IJ43; A0A0N8AAE1	2	2737.4	5.24	High	0	6.266e-09
	FALSE	High	KSVIFTDGADQVEIKDEQVFINNK	1xDeamidated [Q]	0.00942582	0	2	18	2	A0A0P6IJ43; A0A0N8AAE1	2	2738.39	3.91	High	0	0.005372
	FALSE	High	QAAISGLDEKVEAIELEK		2.91941e-06	0	2	23	4	A0A0P6IJ43; A0A0N8AAE1	1	1943.03	4.79	High	0	1.847e-05
	FALSE	High	QLVLDGTFTVSPSQR		0.000682424	0	2	34	1	A0A0P6IJ43; A0A0N8AAE1	0	1647.87	3.58	High	0	0.0002805
	FALSE	High	TTDSVSQFSENIWNR		1.01838e-05	0	2	30	1	A0A0P6IJ43; A0A0N8AAE1	0	1783.82	2.84	High	0	2.463e-06
	FALSE	High	KIDSNSFSVSPVLEIQPGTK		3.02179e-06	0	3	34	2	A0A0P6IJ43; E9FVG7; A0A0N8AAE1	1	2146.14	4.82	High	0	2.013e-06
	FALSE	High	ALESSELSFDIR		0.00269612	0	2	31	1	A0A0P6IJ43; A0A0N8AAE1	0	1366.68	3.43	High	0	0.001314
	FALSE	High	IVSPVPYHDLCLMSALK	1xCarbamidomethyl [C11]; 1xOxidation [M13]	0.00469753	0	2	15	1	A0A0P6IJ43; A0A0N8AAE1	0	1959.01	2.51	High	0	0.002452
	FALSE	High	TNELSNLDKIVNLK		0.000576886	0	3	39	1	A0A0P6IJ43; E9FVG7; A0A0N8AAE1	1	1600.89	3.7	High	0	0.0002321
	FALSE	High	GYLLSATTTQEGPK		0.000465097	0	2	32	1	A0A0P6IJ43; A0A0N8AAE1	0	1465.75	3.24	High	0	0.0001817
	FALSE	High	HLESLIAGYR		0.0023491	0	3	16	1	A0A0P6IJ43; E9FVG7; A0A0N8AAE1	0	1158.63	3.13	High	0	0.001128
	FALSE	High	IAAYQGVMR		0.0561517	0	3	26	1	A0A0P6IJ43; E9FVG7; A0A0N8AAE1	0	1008.53	2.61	High	0	0.04028
	FALSE	High	IAAYQGVMR	1xOxidation [M8]	0.0566243	0	3	26	1	A0A0P6IJ43; E9FVG7; A0A0N8AAE1	0	1024.52	2.19	High	0	0.0408
	FALSE	High	MNTEDIVSYKR	1xOxidation [M1]	0.00316167	0	2	23	2	A0A0P6IJ43; A0A0N8AAE1	1	1371.66	3.1	High	0	0.001575
	FALSE	High	TRSEAIASEVSSVRR		0.000670766	0	2	24	1	A0A0P6IJ43; A0A0N8AAE1	2	1647.88	3.46	High	0	0.0002748
	FALSE	High	MAATIHSSMAADFSAR	1xOxidation [M]	0.0204714	0	2	37	2	A0A0P6IJ43; A0A0N8AAE1	0	1682.76	2.72	High	0	0.0129
	FALSE	High	MAATIHSSMAADFSAR	2xOxidation [M1; M9]	0.000634234	0	2	37	1	A0A0P6IJ43; A0A0N8AAE1	0	1698.76	3.29	High	0	0.0002575
	FALSE	High	LLEAYLGPDGVFDKEGVAGLLEK		2.97723e-05	0	2	32	1	A0A0P6IJ43; A0A0N8AAE1	1	2433.29	4.28	High	0	8.239e-06
	FALSE	High	KLVISTTAESNK		0.000205141	0	2	21	1	A0A0P6IJ43; A0A0N8AAE1	1	1290.73	3.75	High	0	7.226e-05
	FALSE	High	TLILDPLGVQVEFQDAK		2.80296e-05	0	2	22	1	A0A0P6IJ43; A0A0N8AAE1	0	1886.03	3.84	High	0	7.723e-06
	FALSE	High	RVEIDVAR		0.0464741	0	3	38	1	A0A0P6IJ43; E9FVG7; A0A0N8AAE1	1	957.548	3.08	High	0	0.03254
	FALSE	High	NMSQVAESSVVDK	1xOxidation [M2]	0.000659307	0	2	20	1	A0A0P6IJ43; A0A0N8AAE1	0	1409.66	2.93	High	0	0.0002695
	FALSE	High	LDADVMDPK	1xOxidation [M6]	0.0503444	0	3	26	1	A0A0P6IJ43; E9FVG7; A0A0N8AAE1	0	1019.47	2.53	High	0	0.03562
	FALSE	High	QALGWYLSLPLAK		0.000914682	0	2	25	1	A0A0P6IJ43; A0A0N8AAE1	0	1459.83	3.23	High	0	0.0003901
	FALSE	High	DLLNVFDAESSPLR		0.000314257	0	2	22	1	A0A0P6IJ43; A0A0N8AAE1	0	1575.8	3.76	High	0	0.0001172
	FALSE	High	SKGTDLAALLTIFGGR		0.000125532	0	2	22	2	A0A0P6IJ43; A0A0N8AAE1	1	1619.91	2.84	High	0	4.175e-05
	FALSE	High	SQFILTVWLDK		0.0296642	0	3	22	1	A0A0P6IJ43; E9FVG7; A0A0N8AAE1	0	1349.75	2.32	High	0	0.01961
	FALSE	High	IGSQASTYTVENR		0.000273786	0	2	28	1	A0A0P6IJ43; A0A0N8AAE1	0	1425.7	3.33	High	0	0.0001001
	FALSE	High	LVISTTAESNK		0.00967183	0	2	21	1	A0A0P6IJ43; A0A0N8AAE1	0	1162.63	3.16	High	0	0.005533
	FALSE	High	TVAQLLEELSR		0.0585538	0	2	22	1	A0A0P6IJ43; A0A0N8AAE1	0	1258.7	1.87	High	0	0.04229
	FALSE	High	ASLIKDQNGMSINMDSEVR	2xOxidation [M10; M14]	0.00176035	0	2	31	1	A0A0P6IJ43; A0A0N8AAE1	1	2140	2.86	High	0	0.0008126
	FALSE	High	ASLIKDQNGMSINMDSEVR	1xDeamidated [Q/N]; 2xOxidation [M10; M14]	0.00208228	0	2	31	2	A0A0P6IJ43; A0A0N8AAE1	1	2140.98	3.37	High	0	0.000982
	FALSE	High	QAAISGLDEK		0.0686179	0	2	23	1	A0A0P6IJ43; A0A0N8AAE1	0	1031.54	2.74	High	0	0.05066
	FALSE	High	DNLVQTTECR	1xCarbamidomethyl [C9]	0.0132861	0	2	23	1	A0A0P6IJ43; A0A0N8AAE1	0	1235.57	2.75	High	0	0.007927
	FALSE	High	TRSEAIASEVSSVR		1.78645e-06	0	2	24	1	A0A0P6IJ43; A0A0N8AAE1	1	1491.78	3.29	High	0	3.479e-07
	FALSE	High	SCKDNVQTVTDSR	1xCarbamidomethyl [C2]	0.000441664	0	3	17	1	A0A0P6IJ43; E9FVG7; A0A0N8AAE1	1	1509.7	2.67	High	0	0.000172
	FALSE	High	GTDLAALLTIFGGR		0.0124585	0	2	22	1	A0A0P6IJ43; A0A0N8AAE1	0	1404.78	1.99	High	0	0.007386
	FALSE	High	SVMFLDTAATFPTVAGFPLR	1xOxidation [M3]	0.000618051	0	3	37	2	A0A0P6IJ43; E9FVG7; A0A0N8AAE1	0	2157.1	2.85	High	0	0.0002504
	FALSE	High	LQQGSTVEVK		0.0392504	0	2	34	1	A0A0P6IJ43; A0A0N8AAE1	0	1088.59	2.46	High	0	0.02687
	FALSE	High	DNVQTVTDSR		0.0274769	0	3	19	1	A0A0P6IJ43; E9FVG7; A0A0N8AAE1	0	1134.54	2.82	High	0	0.018
	FALSE	High	CPCSHSLLR	2xCarbamidomethyl [C1; C3]	0.0389196	0	2	29	1	A0A0P6IJ43; A0A0N8AAE1	0	1129.52	2.22	High	0	0.02659
	FALSE	High	IQTLLNTEEVNQVGSYISSHLQNIR		0.0083219	0	2	23	1	A0A0P6IJ43; A0A0N8AAE1	0	2856.49	1.62	High	0	0.00468
	FALSE	High	TITVQREENIVTVR		0.0022308	0	2	19	2	A0A0P6IJ43; A0A0N8AAE1	1	1657.92	3.94	High	0	0.00106
	FALSE	High	SICQQLAADSPPR	1xCarbamidomethyl [C3]	0.000876118	0	2	21	2	A0A0P6IJ43; A0A0N8AAE1	0	1442.71	3.31	High	0	0.0003702
	FALSE	High	SAVLLVQQTADKAER		1.43129e-05	0	2	32	2	A0A0P6IJ43; A0A0N8AAE1	1	1628.9	4.55	High	0	1.4e-05
	FALSE	High	QAISNANMDILR	1xOxidation [M8]	0.00590037	0	2	21	2	A0A0P6IJ43; A0A0N8AAE1	0	1361.68	3.07	High	0	0.003174
	FALSE	High	MELQLPTTK		0.047865	0	3	34	1	A0A0P6IJ43; E9FVG7; A0A0N8AAE1	0	1060.57	2.52	High	0	0.03362
	FALSE	High	SAVLLVQQTADK		0.00241058	0	2	33	1	A0A0P6IJ43; A0A0N8AAE1	0	1272.72	3.3	High	0	0.001159
	FALSE	High	LCASSSVSIPRPLSDSSK	1xCarbamidomethyl [C2]	4.97132e-05	0	2	24	2	A0A0P6IJ43; E9FVG7	0	1890.96	4.72	High	0	1.901e-05
	FALSE	High	YAAGQTYTYNFQAK		0.000304921	0	2	20	1	A0A0P6IJ43; A0A0N8AAE1	0	1625.76	4.3	High	0	0.0001134
	FALSE	High	LDLVENVQSR		0.00448039	0	2	36	1	A0A0P6IJ43; A0A0N8AAE1	0	1172.63	3.08	High	0	0.002331
	FALSE	High	LSPSAADFSMMLETPFEVAR	2xOxidation [M10; M11]	0.0400894	0	2	35	1	A0A0P6IJ43; A0A0N8AAE1	0	2231.04	1.72	High	0	0.02752
	FALSE	High	RITGAALEIVR		0.0236694	0	3	22	2	A0A0P6IJ43; E9FVG7; A0A0N8AAE1	1	1198.73	3.46	High	0.003911	0.1307
	FALSE	High	ALGNLGVMTAEAR		0.00100128	0	2	30	1	A0A0P6IJ43; A0A0N8AAE1	0	1302.68	3.55	High	0	0.0004304
	FALSE	High	EVDLTVTLPNYNPLR		0.00780247	0	2	28	1	A0A0P6IJ43; A0A0N8AAE1	0	1743.93	2.83	High	0	0.004348
	FALSE	High	SVELSLKPSGPYAK		5.78043e-05	0	2	33	1	A0A0P6IJ43; A0A0N8AAE1	0	1475.81	3.09	High	0	1.738e-05
	FALSE	High	MELQLPTTK	1xOxidation [M1]	0.0428941	0	3	34	1	A0A0P6IJ43; E9FVG7; A0A0N8AAE1	0	1076.57	3.06	High	0	0.02973
	FALSE	High	SSRFPAMNIDLK	1xOxidation [M7]	0.068333	0	2	34	1	A0A0P6IJ43; A0A0N8AAE1	1	1394.71	2.45	High	0	0.05042
	FALSE	High	TFSLVDTGRK		0.0239742	0	2	34	2	A0A0P6IJ43; A0A0N8AAE1	1	1123.61	2.99	High	0	0.01544
	FALSE	High	GPMLVTVDSAGK	1xOxidation [M3]	0.00245246	0	3	35	1	A0A0P6IJ43; E9FVG7; A0A0N8AAE1	0	1190.61	3.7	High	0	0.001182
	FALSE	High	GVMIIQMDNVK	2xOxidation [M3; M7]	0.0118335	0	2	33	1	A0A0P6IJ43; A0A0N8AAE1	0	1279.64	2.71	High	0	0.006972
	FALSE	High	ESHLFRPLSSEEGGAR		0.00205555	0	3	23	2	A0A0P6IJ43; E9FVG7; A0A0N8AAE1	0	1771.87	4.54	High	0	0.0009697
	FALSE	High	MNTEDIVSYK	1xOxidation [M1]	0.0184754	0	2	24	1	A0A0P6IJ43; A0A0N8AAE1	0	1215.56	3.39	High	0	0.01147
	FALSE	High	CPTEYTVEGTGSSIK	1xCarbamidomethyl [C1]	8.40899e-05	0	2	23	1	A0A0P6IJ43; A0A0N8AAE1	0	1628.75	4	High	0	2.658e-05
	FALSE	High	SEAIASEVSSVR		0.00153372	0	2	24	1	A0A0P6IJ43; A0A0N8AAE1	0	1234.63	3.3	High	0	0.0006959
	FALSE	High	INLNPAQR		0.0790115	0.000973478	3	29	1	A0A0P6IJ43; E9FVG7; A0A0N8AAE1	0	925.521	2.44	High	0.0007147	0.05948
	FALSE	High	IVNEATYAR		0.0709389	0.000973478	3	36	1	A0A0P6IJ43; E9FVG7; A0A0N8AAE1	0	1036.54	2.44	High	0.0007147	0.0526
	FALSE	High	ASLIKDQNGMSINMDSEVR	2xDeamidated [N13; Q/N]; 1xOxidation [M14]	0.0742532	0.000973478	2	31	2	A0A0P6IJ43; A0A0N8AAE1	1	2125.97	2.04	High	0.0007147	0.05532
	FALSE	High	DIKLPITVR		0.0901489	0.000973478	2	27	1	A0A0P6IJ43; A0A0N8AAE1	1	1054.66	2.36	High	0.0007147	0.06909
	FALSE	High	TEVEEDESMKAVVEMMEK	3xOxidation [M9; M15; M16]	0.086518	0.000973478	2	24	1	A0A0P6IJ43; A0A0N8AAE1	1	2161.92	1.62	High	0.0007147	0.06572
	FALSE	High	GVMIIQMDNVK	1xOxidation [M3]	0.112358	0.0018991	2	33	1	A0A0P6IJ43; A0A0N8AAE1	0	1263.64	1.92	High	0.001394	0.08858
	FALSE	High	YVKVPISK		0.127817	0.00358207	2	20	1	A0A0P6IJ43; A0A0N8AAE1	1	933.577	2.48	High	0.00329	0.1023
	FALSE	High	ISKDMISFVNSWK	1xOxidation [M5]	0.118417	0.00358207	3	18	1	A0A0P6IJ43; E9FVG7; A0A0N8AAE1	1	1570.79	2.62	High	0.00329	0.09374
	FALSE	High	IQTLLNTEEVNQVGSYISSHLQNIR	1xDeamidated [Q2]	0.142917	0.00358207	2	23	1	A0A0P6IJ43; A0A0N8AAE1	0	2857.47	1.29	High	0.00329	0.1162
	FALSE	High	VFSVAFNGK		0.120342	0.00358207	2	34	1	A0A0P6IJ43; A0A0N8AAE1	0	968.52	2.4	High	0.00329	0.09586
	FALSE	High	LAAIQATR		0.164688	0.00527855	2	30	1	A0A0P6IJ43; A0A0N8AAE1	0	843.505	2.3	High	0.004515	0.1366
	FALSE	High	FKLTTATPIK		0.169249	0.00527855	3	32	1	A0A0P6IJ43; E9FVG7; A0A0N8AAE1	1	1119.68	2.6	High	0.004515	0.1408
	FALSE	High	IEKELFLR		0.162131	0.00527855	2	25	1	A0A0P6IJ43; A0A0N8AAE1	1	1047.62	2.15	High	0.004515	0.1341
	FALSE	High	EENIVTVR		0.167935	0.00527855	3	20	1	A0A0P6IJ43; E9FVG7; A0A0N8AAE1	0	959.516	2.49	High	0.004515	0.1394
	FALSE	High	DPLNSNIK		0.179399	0.00607653	2	39	1	A0A0P6IJ43; A0A0N8AAE1	0	900.479	2.12	High	0.005091	0.1507
	FALSE	High	TKIPNQCSSR	1xCarbamidomethyl [C7]	0.196742	0.00767163	2	23	1	A0A0P6IJ43; A0A0N8AAE1	1	1190.59	1.65	High	0.006261	0.1669
	FALSE	High	LDMDINLIR		0.190076	0.00767163	2	37	1	A0A0P6IJ43; A0A0N8AAE1	0	1102.59	1.75	High	0.006261	0.1605
	FALSE	High	NVDGFVEVK		0.196742	0.00767163	2	35	1	A0A0P6IJ43; A0A0N8AAE1	0	1006.52	1.63	High	0.006261	0.167
	FALSE	High	ALGNLGVMTAEAR	1xOxidation [M8]	0.190076	0.00767163	2	30	1	A0A0P6IJ43; A0A0N8AAE1	0	1318.68	1.02	High	0.006261	0.1604
FALSE	High	Master Protein	A0A0N8AAE1	Apolipophorins OS=Daphnia magna PE=4 SV=1	0	394.604	39.4268	111	148	1	1	3140	349.8	8.97	409.71	111
	Checked	Confidence	Sequence	Modifications	Qvality PEP	Qvality q-value	# Protein Groups	# Proteins	# PSMs	Master Protein Accessions	# Missed Cleavages	Theo. MH+ [Da]	XCorr Sequest HT	Confidence Sequest HT	Percolator q-Value Sequest HT	Percolator PEP Sequest HT
	FALSE	High	DACTFELSPFYAGR	1xCarbamidomethyl [C3]	0.00244192	0	3	17	1	A0A0P6IJ43; E9FVG7; A0A0N8AAE1	0	1633.73	3.28	High	0	0.001174
	FALSE	High	LDMDINLIR	1xOxidation [M3]	0.0644609	0	2	37	1	A0A0P6IJ43; A0A0N8AAE1	0	1118.59	2.47	High	0	0.04706
	FALSE	High	LLAVALPAK		0.0545272	0	3	21	1	A0A0P6IJ43; E9FVG7; A0A0N8AAE1	0	895.598	2.21	High	0	0.03906
	FALSE	High	FVDGELALVIAPK		0.000323878	0	2	34	1	A0A0P6IJ43; A0A0N8AAE1	0	1371.79	3.28	High	0	0.0001211
	FALSE	High	LLEAYLGPDGVFDK		0.000524723	0	2	33	1	A0A0P6IJ43; A0A0N8AAE1	0	1536.79	3.06	High	0	0.0002083
	FALSE	High	LNGYASLIGSK	1xDeamidated [N2]	0.0129487	0	3	21	1	A0A0P6IJ43; E9FVG7; A0A0N8AAE1	0	1123.6	2.67	High	0	0.007682
	FALSE	High	DKPSGIKLDAFLR		0.000824843	0	2	38	1	A0A0P6IJ43; A0A0N8AAE1	1	1459.83	3.55	High	0	0.000346
	FALSE	High	AIILEGGFGHEIGR		6.13981e-05	0	2	32	2	A0A0P6IJ43; A0A0N8AAE1	0	1468.79	4.51	High	0	1.865e-05
	FALSE	High	AIENVIETLTER		0.00309435	0	2	23	1	A0A0P6IJ43; A0A0N8AAE1	0	1387.74	3.55	High	0	0.001538
	FALSE	High	IEEITEQMGEKSDIVEAIEK	1xOxidation [M8]	0.000123387	0	2	21	2	A0A0P6IJ43; A0A0N8AAE1	1	2307.13	3.37	High	0	4.096e-05
	FALSE	High	SEGSLVVMWSSPSQR	1xOxidation [M8]	0.00170073	0	3	34	1	A0A0P6IJ43; E9FVG7; A0A0N8AAE1	0	1665.79	3.03	High	0	0.0007816
	FALSE	High	TAENVLLAGANLK		0.000332359	0	3	27	2	A0A0P6IJ43; E9FVG7; A0A0N8AAE1	0	1313.74	4.25	High	0	0.0001247
	FALSE	High	SEGSLVVMWSSPSQR		0.00204672	0	3	34	1	A0A0P6IJ43; E9FVG7; A0A0N8AAE1	0	1649.8	3.22	High	0	0.0009649
	FALSE	High	LAYLTLGSPAK		0.00930517	0	2	24	1	A0A0P6IJ43; A0A0N8AAE1	0	1133.66	2.79	High	0	0.0053
	FALSE	High	VFGSEIGMYAYR		0.00209126	0	2	35	1	A0A0P6IJ43; A0A0N8AAE1	0	1392.66	2.16	High	0	0.0009856
	FALSE	High	VFGSEIGMYAYR	1xOxidation [M8]	0.00202044	0	2	35	1	A0A0P6IJ43; A0A0N8AAE1	0	1408.66	3.08	High	0	0.00095
	FALSE	High	IYEVDVVAGLSEDKAK		3.20347e-05	0	2	29	2	A0A0P6IJ43; A0A0N8AAE1	1	1735.91	3.87	High	0	2.316e-05
	FALSE	High	IAMVSSYDITSISNFDISEK	1xOxidation [M3]	0.00600274	0	2	32	1	A0A0P6IJ43; A0A0N8AAE1	0	2236.07	2.22	High	0	0.003234
	FALSE	High	TFSLVDTGR		0.0407733	0	2	34	1	A0A0P6IJ43; A0A0N8AAE1	0	995.516	2.14	High	0	0.02803
	FALSE	High	AESKLDMDINLIR	1xOxidation [M7]	0.011288	0	2	37	2	A0A0P6IJ43; A0A0N8AAE1	1	1533.79	3.64	High	0	0.00658
	FALSE	High	ITGAALEIVR		0.00550801	0	3	22	1	A0A0P6IJ43; E9FVG7; A0A0N8AAE1	0	1042.63	2.99	High	0	0.002932
	FALSE	High	GLLTSAPTVTVK		0.0151736	0	2	38	1	A0A0P6IJ43; A0A0N8AAE1	0	1186.7	3.31	High	0	0.009213
	FALSE	High	VFSVAFNGK	1xDeamidated [N7]	0.0397517	0	2	34	1	A0A0P6IJ43; A0A0N8AAE1	0	969.504	2.04	High	0	0.02729
	FALSE	High	SKITLIDFK		0.065819	0	2	35	1	A0A0P6IJ43; A0A0N8AAE1	1	1064.64	2.91	High	0	0.04835
	FALSE	High	LQQGSTVEVKLDLPK		0.000415813	0	2	33	1	A0A0P6IJ43; A0A0N8AAE1	1	1654.94	3.22	High	0	0.0001607
	FALSE	High	CDVVKDACTFELSPFYAGR	2xCarbamidomethyl [C1; C8]	0.000328091	0	2	16	1	A0A0P6IJ43; A0A0N8AAE1	1	2235.02	3	High	0	0.0001228
	FALSE	High	SVIFTDGADQVEIKDEQVFINNK		1.46811e-07	0	2	19	1	A0A0P6IJ43; A0A0N8AAE1	1	2609.31	4.78	High	0	2.088e-08
	FALSE	High	DMISFVNSWK		0.0313497	0	3	18	1	A0A0P6IJ43; E9FVG7; A0A0N8AAE1	0	1226.59	2.21	High	0	0.02091
	FALSE	High	DMISFVNSWK	1xOxidation [M2]	0.0397517	0	3	18	1	A0A0P6IJ43; E9FVG7; A0A0N8AAE1	0	1242.58	2.4	High	0	0.02731
	FALSE	High	IEWDGQPQIVLDGK		0.0118843	0	2	36	1	A0A0P6IJ43; A0A0N8AAE1	0	1597.82	1.85	High	0	0.00698
	FALSE	High	VTSFLMTFDTPGSK	1xOxidation [M6]	0.000483484	0	2	36	1	A0A0P6IJ43; A0A0N8AAE1	0	1546.75	3.13	High	0	0.0001902
	FALSE	High	IYEVDVVAGLSEDK		0.000868602	0	2	29	1	A0A0P6IJ43; A0A0N8AAE1	0	1536.78	2.66	High	0	0.0003669
	FALSE	High	SFDLSGGSCQYLLAR	1xCarbamidomethyl [C9]	1.92678e-05	0	3	20	1	A0A0P6IJ43; E9FVG7; A0A0N8AAE1	0	1673.8	3.17	High	0	5.067e-06
	FALSE	High	SVIFTDGADQVEIKDEQVFINNK	1xDeamidated [Q10]	0.0127832	0	2	19	1	A0A0P6IJ43; A0A0N8AAE1	1	2610.29	1.84	High	0	0.007575
	FALSE	High	KTVAQLLEELSR		0.0525055	0	2	22	1	A0A0P6IJ43; A0A0N8AAE1	1	1386.8	1.77	High	0	0.03743
	FALSE	High	DSEFGLEIYTPK		0.00621283	0	2	21	1	A0A0P6IJ43; A0A0N8AAE1	0	1398.68	2.57	High	0	0.003358
	FALSE	High	APWGNLAVEAEMVNQADIK	1xOxidation [M12]	0.00461738	0	2	33	1	A0A0P6IJ43; A0A0N8AAE1	0	2072.01	1.98	High	0	0.002407
	FALSE	High	IDSNSFSVSPVLEIQPGTK		0.000274968	0	3	34	1	A0A0P6IJ43; E9FVG7; A0A0N8AAE1	0	2018.04	3.17	High	0	0.0001007
	FALSE	High	DNLLNILEGKNEDAEVR		0.000599692	0	2	25	1	A0A0P6IJ43; A0A0N8AAE1	1	1941.99	2.61	High	0	0.0002417
	FALSE	High	FLGDTTSGSLNVAWDADRDASK		0.00811012	0	2	36	1	A0A0P6IJ43; A0A0N8AAE1	1	2326.09	1.96	High	0	0.004537
	FALSE	High	VDWGTGTFTVSGTTK		2.05541e-05	0	2	26	1	A0A0P6IJ43; A0A0N8AAE1	0	1556.76	3.3	High	0	5.433e-06
	FALSE	High	KSVIFTDGADQVEIKDEQVFINNK		5.04344e-08	0	2	18	1	A0A0P6IJ43; A0A0N8AAE1	2	2737.4	5.24	High	0	6.266e-09
	FALSE	High	KSVIFTDGADQVEIKDEQVFINNK	1xDeamidated [Q]	0.00942582	0	2	18	2	A0A0P6IJ43; A0A0N8AAE1	2	2738.39	3.91	High	0	0.005372
	FALSE	High	QAAISGLDEKVEAIELEK		2.91941e-06	0	2	23	4	A0A0P6IJ43; A0A0N8AAE1	1	1943.03	4.79	High	0	1.847e-05
	FALSE	High	QLVLDGTFTVSPSQR		0.000682424	0	2	34	1	A0A0P6IJ43; A0A0N8AAE1	0	1647.87	3.58	High	0	0.0002805
	FALSE	High	TTDSVSQFSENIWNR		1.01838e-05	0	2	30	1	A0A0P6IJ43; A0A0N8AAE1	0	1783.82	2.84	High	0	2.463e-06
	FALSE	High	KIDSNSFSVSPVLEIQPGTK		3.02179e-06	0	3	34	2	A0A0P6IJ43; E9FVG7; A0A0N8AAE1	1	2146.14	4.82	High	0	2.013e-06
	FALSE	High	ALESSELSFDIR		0.00269612	0	2	31	1	A0A0P6IJ43; A0A0N8AAE1	0	1366.68	3.43	High	0	0.001314
	FALSE	High	IVSPVPYHDLCLMSALK	1xCarbamidomethyl [C11]; 1xOxidation [M13]	0.00469753	0	2	15	1	A0A0P6IJ43; A0A0N8AAE1	0	1959.01	2.51	High	0	0.002452
	FALSE	High	TNELSNLDKIVNLK		0.000576886	0	3	39	1	A0A0P6IJ43; E9FVG7; A0A0N8AAE1	1	1600.89	3.7	High	0	0.0002321
	FALSE	High	GYLLSATTTQEGPK		0.000465097	0	2	32	1	A0A0P6IJ43; A0A0N8AAE1	0	1465.75	3.24	High	0	0.0001817
	FALSE	High	HLESLIAGYR		0.0023491	0	3	16	1	A0A0P6IJ43; E9FVG7; A0A0N8AAE1	0	1158.63	3.13	High	0	0.001128
	FALSE	High	IAAYQGVMR		0.0561517	0	3	26	1	A0A0P6IJ43; E9FVG7; A0A0N8AAE1	0	1008.53	2.61	High	0	0.04028
	FALSE	High	IAAYQGVMR	1xOxidation [M8]	0.0566243	0	3	26	1	A0A0P6IJ43; E9FVG7; A0A0N8AAE1	0	1024.52	2.19	High	0	0.0408
	FALSE	High	MNTEDIVSYKR	1xOxidation [M1]	0.00316167	0	2	23	2	A0A0P6IJ43; A0A0N8AAE1	1	1371.66	3.1	High	0	0.001575
	FALSE	High	TRSEAIASEVSSVRR		0.000670766	0	2	24	1	A0A0P6IJ43; A0A0N8AAE1	2	1647.88	3.46	High	0	0.0002748
	FALSE	High	MAATIHSSMAADFSAR	1xOxidation [M]	0.0204714	0	2	37	2	A0A0P6IJ43; A0A0N8AAE1	0	1682.76	2.72	High	0	0.0129
	FALSE	High	MAATIHSSMAADFSAR	2xOxidation [M1; M9]	0.000634234	0	2	37	1	A0A0P6IJ43; A0A0N8AAE1	0	1698.76	3.29	High	0	0.0002575
	FALSE	High	LLEAYLGPDGVFDKEGVAGLLEK		2.97723e-05	0	2	32	1	A0A0P6IJ43; A0A0N8AAE1	1	2433.29	4.28	High	0	8.239e-06
	FALSE	High	KLVISTTAESNK		0.000205141	0	2	21	1	A0A0P6IJ43; A0A0N8AAE1	1	1290.73	3.75	High	0	7.226e-05
	FALSE	High	TLILDPLGVQVEFQDAK		2.80296e-05	0	2	22	1	A0A0P6IJ43; A0A0N8AAE1	0	1886.03	3.84	High	0	7.723e-06
	FALSE	High	RVEIDVAR		0.0464741	0	3	38	1	A0A0P6IJ43; E9FVG7; A0A0N8AAE1	1	957.548	3.08	High	0	0.03254
	FALSE	High	NMSQVAESSVVDK	1xOxidation [M2]	0.000659307	0	2	20	1	A0A0P6IJ43; A0A0N8AAE1	0	1409.66	2.93	High	0	0.0002695
	FALSE	High	LDADVMDPK	1xOxidation [M6]	0.0503444	0	3	26	1	A0A0P6IJ43; E9FVG7; A0A0N8AAE1	0	1019.47	2.53	High	0	0.03562
	FALSE	High	QALGWYLSLPLAK		0.000914682	0	2	25	1	A0A0P6IJ43; A0A0N8AAE1	0	1459.83	3.23	High	0	0.0003901
	FALSE	High	DLLNVFDAESSPLR		0.000314257	0	2	22	1	A0A0P6IJ43; A0A0N8AAE1	0	1575.8	3.76	High	0	0.0001172
	FALSE	High	SKGTDLAALLTIFGGR		0.000125532	0	2	22	2	A0A0P6IJ43; A0A0N8AAE1	1	1619.91	2.84	High	0	4.175e-05
	FALSE	High	SQFILTVWLDK		0.0296642	0	3	22	1	A0A0P6IJ43; E9FVG7; A0A0N8AAE1	0	1349.75	2.32	High	0	0.01961
	FALSE	High	IGSQASTYTVENR		0.000273786	0	2	28	1	A0A0P6IJ43; A0A0N8AAE1	0	1425.7	3.33	High	0	0.0001001
	FALSE	High	LVISTTAESNK		0.00967183	0	2	21	1	A0A0P6IJ43; A0A0N8AAE1	0	1162.63	3.16	High	0	0.005533
	FALSE	High	LGSADFTNGDHTVR		1.52028e-05	0	2	9	2	E9FVG7; A0A0N8AAE1	0	1489.7	4.62	High	0	3.874e-06
	FALSE	High	LGSADFTNGDHTVR	1xDeamidated [N8]	0.00839371	0	2	9	1	E9FVG7; A0A0N8AAE1	0	1490.69	2.83	High	0	0.004724
	FALSE	High	TVAQLLEELSR		0.0585538	0	2	22	1	A0A0P6IJ43; A0A0N8AAE1	0	1258.7	1.87	High	0	0.04229
	FALSE	High	ASLIKDQNGMSINMDSEVR	2xOxidation [M10; M14]	0.00176035	0	2	31	1	A0A0P6IJ43; A0A0N8AAE1	1	2140	2.86	High	0	0.0008126
	FALSE	High	ASLIKDQNGMSINMDSEVR	1xDeamidated [Q/N]; 2xOxidation [M10; M14]	0.00208228	0	2	31	2	A0A0P6IJ43; A0A0N8AAE1	1	2140.98	3.37	High	0	0.000982
	FALSE	High	QAAISGLDEK		0.0686179	0	2	23	1	A0A0P6IJ43; A0A0N8AAE1	0	1031.54	2.74	High	0	0.05066
	FALSE	High	DNLVQTTECR	1xCarbamidomethyl [C9]	0.0132861	0	2	23	1	A0A0P6IJ43; A0A0N8AAE1	0	1235.57	2.75	High	0	0.007927
	FALSE	High	TRSEAIASEVSSVR		1.78645e-06	0	2	24	1	A0A0P6IJ43; A0A0N8AAE1	1	1491.78	3.29	High	0	3.479e-07
	FALSE	High	SCKDNVQTVTDSR	1xCarbamidomethyl [C2]	0.000441664	0	3	17	1	A0A0P6IJ43; E9FVG7; A0A0N8AAE1	1	1509.7	2.67	High	0	0.000172
	FALSE	High	DTAPAFPLSGSTSFAIVLEK		0.0310844	0	1	11	1	A0A0N8AAE1	0	2051.07	1.36	High	0	0.02069
	FALSE	High	GTDLAALLTIFGGR		0.0124585	0	2	22	1	A0A0P6IJ43; A0A0N8AAE1	0	1404.78	1.99	High	0	0.007386
	FALSE	High	SVMFLDTAATFPTVAGFPLR	1xOxidation [M3]	0.000618051	0	3	37	2	A0A0P6IJ43; E9FVG7; A0A0N8AAE1	0	2157.1	2.85	High	0	0.0002504
	FALSE	High	LQQGSTVEVK		0.0392504	0	2	34	1	A0A0P6IJ43; A0A0N8AAE1	0	1088.59	2.46	High	0	0.02687
	FALSE	High	DNVQTVTDSR		0.0274769	0	3	19	1	A0A0P6IJ43; E9FVG7; A0A0N8AAE1	0	1134.54	2.82	High	0	0.018
	FALSE	High	CPCSHSLLR	2xCarbamidomethyl [C1; C3]	0.0389196	0	2	29	1	A0A0P6IJ43; A0A0N8AAE1	0	1129.52	2.22	High	0	0.02659
	FALSE	High	IQTLLNTEEVNQVGSYISSHLQNIR		0.0083219	0	2	23	1	A0A0P6IJ43; A0A0N8AAE1	0	2856.49	1.62	High	0	0.00468
	FALSE	High	TITVQREENIVTVR		0.0022308	0	2	19	2	A0A0P6IJ43; A0A0N8AAE1	1	1657.92	3.94	High	0	0.00106
	FALSE	High	SICQQLAADSPPR	1xCarbamidomethyl [C3]	0.000876118	0	2	21	2	A0A0P6IJ43; A0A0N8AAE1	0	1442.71	3.31	High	0	0.0003702
	FALSE	High	SAVLLVQQTADKAER		1.43129e-05	0	2	32	2	A0A0P6IJ43; A0A0N8AAE1	1	1628.9	4.55	High	0	1.4e-05
	FALSE	High	QAISNANMDILR	1xOxidation [M8]	0.00590037	0	2	21	2	A0A0P6IJ43; A0A0N8AAE1	0	1361.68	3.07	High	0	0.003174
	FALSE	High	MELQLPTTK		0.047865	0	3	34	1	A0A0P6IJ43; E9FVG7; A0A0N8AAE1	0	1060.57	2.52	High	0	0.03362
	FALSE	High	SAVLLVQQTADK		0.00241058	0	2	33	1	A0A0P6IJ43; A0A0N8AAE1	0	1272.72	3.3	High	0	0.001159
	FALSE	High	YAAGQTYTYNFQAK		0.000304921	0	2	20	1	A0A0P6IJ43; A0A0N8AAE1	0	1625.76	4.3	High	0	0.0001134
	FALSE	High	LDLVENVQSR		0.00448039	0	2	36	1	A0A0P6IJ43; A0A0N8AAE1	0	1172.63	3.08	High	0	0.002331
	FALSE	High	LSPSAADFSMMLETPFEVAR	2xOxidation [M10; M11]	0.0400894	0	2	35	1	A0A0P6IJ43; A0A0N8AAE1	0	2231.04	1.72	High	0	0.02752
	FALSE	High	RITGAALEIVR		0.0236694	0	3	22	2	A0A0P6IJ43; E9FVG7; A0A0N8AAE1	1	1198.73	3.46	High	0.003911	0.1307
	FALSE	High	ALGNLGVMTAEAR		0.00100128	0	2	30	1	A0A0P6IJ43; A0A0N8AAE1	0	1302.68	3.55	High	0	0.0004304
	FALSE	High	EVDLTVTLPNYNPLR		0.00780247	0	2	28	1	A0A0P6IJ43; A0A0N8AAE1	0	1743.93	2.83	High	0	0.004348
	FALSE	High	SVELSLKPSGPYAK		5.78043e-05	0	2	33	1	A0A0P6IJ43; A0A0N8AAE1	0	1475.81	3.09	High	0	1.738e-05
	FALSE	High	MELQLPTTK	1xOxidation [M1]	0.0428941	0	3	34	1	A0A0P6IJ43; E9FVG7; A0A0N8AAE1	0	1076.57	3.06	High	0	0.02973
	FALSE	High	SSRFPAMNIDLK	1xOxidation [M7]	0.068333	0	2	34	1	A0A0P6IJ43; A0A0N8AAE1	1	1394.71	2.45	High	0	0.05042
	FALSE	High	TFSLVDTGRK		0.0239742	0	2	34	2	A0A0P6IJ43; A0A0N8AAE1	1	1123.61	2.99	High	0	0.01544
	FALSE	High	GPMLVTVDSAGK	1xOxidation [M3]	0.00245246	0	3	35	1	A0A0P6IJ43; E9FVG7; A0A0N8AAE1	0	1190.61	3.7	High	0	0.001182
	FALSE	High	GVMIIQMDNVK	2xOxidation [M3; M7]	0.0118335	0	2	33	1	A0A0P6IJ43; A0A0N8AAE1	0	1279.64	2.71	High	0	0.006972
	FALSE	High	ESHLFRPLSSEEGGAR		0.00205555	0	3	23	2	A0A0P6IJ43; E9FVG7; A0A0N8AAE1	0	1771.87	4.54	High	0	0.0009697
	FALSE	High	MNTEDIVSYK	1xOxidation [M1]	0.0184754	0	2	24	1	A0A0P6IJ43; A0A0N8AAE1	0	1215.56	3.39	High	0	0.01147
	FALSE	High	CPTEYTVEGTGSSIK	1xCarbamidomethyl [C1]	8.40899e-05	0	2	23	1	A0A0P6IJ43; A0A0N8AAE1	0	1628.75	4	High	0	2.658e-05
	FALSE	High	SEAIASEVSSVR		0.00153372	0	2	24	1	A0A0P6IJ43; A0A0N8AAE1	0	1234.63	3.3	High	0	0.0006959
	FALSE	High	INLNPAQR		0.0790115	0.000973478	3	29	1	A0A0P6IJ43; E9FVG7; A0A0N8AAE1	0	925.521	2.44	High	0.0007147	0.05948
	FALSE	High	IVNEATYAR		0.0709389	0.000973478	3	36	1	A0A0P6IJ43; E9FVG7; A0A0N8AAE1	0	1036.54	2.44	High	0.0007147	0.0526
	FALSE	High	ASLIKDQNGMSINMDSEVR	2xDeamidated [N13; Q/N]; 1xOxidation [M14]	0.0742532	0.000973478	2	31	2	A0A0P6IJ43; A0A0N8AAE1	1	2125.97	2.04	High	0.0007147	0.05532
	FALSE	High	DIKLPITVR		0.0901489	0.000973478	2	27	1	A0A0P6IJ43; A0A0N8AAE1	1	1054.66	2.36	High	0.0007147	0.06909
	FALSE	High	TEVEEDESMKAVVEMMEK	3xOxidation [M9; M15; M16]	0.086518	0.000973478	2	24	1	A0A0P6IJ43; A0A0N8AAE1	1	2161.92	1.62	High	0.0007147	0.06572
	FALSE	High	GVMIIQMDNVK	1xOxidation [M3]	0.112358	0.0018991	2	33	1	A0A0P6IJ43; A0A0N8AAE1	0	1263.64	1.92	High	0.001394	0.08858
	FALSE	High	YVKVPISK		0.127817	0.00358207	2	20	1	A0A0P6IJ43; A0A0N8AAE1	1	933.577	2.48	High	0.00329	0.1023
	FALSE	High	ISKDMISFVNSWK	1xOxidation [M5]	0.118417	0.00358207	3	18	1	A0A0P6IJ43; E9FVG7; A0A0N8AAE1	1	1570.79	2.62	High	0.00329	0.09374
	FALSE	High	IQTLLNTEEVNQVGSYISSHLQNIR	1xDeamidated [Q2]	0.142917	0.00358207	2	23	1	A0A0P6IJ43; A0A0N8AAE1	0	2857.47	1.29	High	0.00329	0.1162
	FALSE	High	VFSVAFNGK		0.120342	0.00358207	2	34	1	A0A0P6IJ43; A0A0N8AAE1	0	968.52	2.4	High	0.00329	0.09586
	FALSE	High	LAAIQATR		0.164688	0.00527855	2	30	1	A0A0P6IJ43; A0A0N8AAE1	0	843.505	2.3	High	0.004515	0.1366
	FALSE	High	FKLTTATPIK		0.169249	0.00527855	3	32	1	A0A0P6IJ43; E9FVG7; A0A0N8AAE1	1	1119.68	2.6	High	0.004515	0.1408
	FALSE	High	IEKELFLR		0.162131	0.00527855	2	25	1	A0A0P6IJ43; A0A0N8AAE1	1	1047.62	2.15	High	0.004515	0.1341
	FALSE	High	EENIVTVR		0.167935	0.00527855	3	20	1	A0A0P6IJ43; E9FVG7; A0A0N8AAE1	0	959.516	2.49	High	0.004515	0.1394
	FALSE	High	DPLNSNIK		0.179399	0.00607653	2	39	1	A0A0P6IJ43; A0A0N8AAE1	0	900.479	2.12	High	0.005091	0.1507
	FALSE	High	TKIPNQCSSR	1xCarbamidomethyl [C7]	0.196742	0.00767163	2	23	1	A0A0P6IJ43; A0A0N8AAE1	1	1190.59	1.65	High	0.006261	0.1669
	FALSE	High	LDMDINLIR		0.190076	0.00767163	2	37	1	A0A0P6IJ43; A0A0N8AAE1	0	1102.59	1.75	High	0.006261	0.1605
	FALSE	High	NVDGFVEVK		0.196742	0.00767163	2	35	1	A0A0P6IJ43; A0A0N8AAE1	0	1006.52	1.63	High	0.006261	0.167
	FALSE	High	ALGNLGVMTAEAR	1xOxidation [M8]	0.190076	0.00767163	2	30	1	A0A0P6IJ43; A0A0N8AAE1	0	1318.68	1.02	High	0.006261	0.1604
FALSE	High	Master Protein	A0A0P5XGU4	Putative Copper-zinc cu-zn superoxide dismutase OS=Daphnia magna PE=4 SV=1	0	387.363	51.6379	74	141	2	1	1160	131.2	8.57	417.62	74
	Checked	Confidence	Sequence	Modifications	Qvality PEP	Qvality q-value	# Protein Groups	# Proteins	# PSMs	Master Protein Accessions	# Missed Cleavages	Theo. MH+ [Da]	XCorr Sequest HT	Confidence Sequest HT	Percolator q-Value Sequest HT	Percolator PEP Sequest HT
	FALSE	High	HLGMDFVFVER	1xOxidation [M4]	0.000872352	0	12	112	2	A0A0P5I0U9; A0A0P5BM18; A0A0P4YK27; A0A0P5GUJ5; A0A0P5PPT4; A0A0P5PJQ0; A0A0P5XGU4; A0A0P5ECS0; A0A0N8AKQ7; A0A0P5UT23; A0A0P5NEQ8; A0A0N8DYK4	0	1365.66	3.36	High	0	0.01263
	FALSE	High	HLGMDFVFVER		0.000610115	0	12	112	1	A0A0P5I0U9; A0A0P5BM18; A0A0P4YK27; A0A0P5GUJ5; A0A0P5PPT4; A0A0P5PJQ0; A0A0P5XGU4; A0A0P5ECS0; A0A0N8AKQ7; A0A0P5UT23; A0A0P5NEQ8; A0A0N8DYK4	0	1349.67	2.91	High	0	0.0002464
	FALSE	High	DESSIISPELEK		0.00455817	0	18	150	1	A0A0P5Z193; E9HZI6; A0A0P5XPE2; A0A0P5BM18; A0A0P5S327; A0A0P4YK27; A0A0P5IAS3; A0A0P5GUJ5; A0A0P5I5B7; A0A0P5PJQ0; A0A0P5XGU4; A0A0P6FTA8; A0A0P5ECS0; A0A0P5UT23; E9GVW7; A0A0P6EEN9; A0A0P5NEQ8; A0A0N8DYK4	0	1346.67	3.2	High	0	0.002369
	FALSE	High	TADNFIEVDSPISHMIR	1xOxidation [M15]	4.24698e-06	0	7	118	3	A0A0P5BM18; A0A0P5M269; A0A0P5XGU4; A0A0P5ECS0; A0A0N8AKQ7; A0A0P5UT23; A0A0P5YRE9	0	1960.94	4.91	High	0	9.198e-07
	FALSE	High	VFKPYSNVFFR		0.0644609	0	7	111	1	A0A0P5BM18; A0A0P5PPT4; A0A0P5XGU4; A0A0P5ECS0; A0A0N8AKQ7; A0A0P5YRE9; A0A0P5NEQ8	0	1403.75	2.98	High	0	0.04722
	FALSE	High	IQTTWETLGDKLR		0.00029714	0	15	156	4	A0A0P5Z193; A0A0P5BM18; A0A0P4YK27; A0A0P5GUJ5; A0A0P5I5B7; A0A0P5PPT4; A0A0P5PJQ0; A0A0P5XGU4; A0A0P6FTA8; A0A0P5ECS0; A0A0N8AKQ7; A0A0P5KLT7; A0A0P5NG35; A0A0P5NEQ8; A0A0N8DYK4	1	1560.84	3.5	High	0	0.0001097
	FALSE	High	KEIVGTLLMPIFFNK	1xOxidation [M9]	1.70782e-05	0	22	169	2	A0A0P5Z193; E9HZI6; A0A0P5BM18; A0A0P5S327; A0A0P6FZL4; A0A0P4YK27; A0A0P5IAS3; A0A0P5GUJ5; A0A0P5I5B7; A0A0P5LYR5; A0A0P5PJQ0; A0A0P5XGU4; A0A0P6FTA8; A0A0P5ECS0; A0A0N8AKQ7; A0A0P5KLT7; A0A0P5UT23; A0A0P5NG35; E9GVW7; A0A0P6EEN9; A0A0P5NEQ8; A0A0N8DYK4	1	1765.99	4.02	High	0	4.421e-06
	FALSE	High	KEIVGTLLMPIFFNK		0.000437875	0	22	169	1	A0A0P5Z193; E9HZI6; A0A0P5BM18; A0A0P5S327; A0A0P6FZL4; A0A0P4YK27; A0A0P5IAS3; A0A0P5GUJ5; A0A0P5I5B7; A0A0P5LYR5; A0A0P5PJQ0; A0A0P5XGU4; A0A0P6FTA8; A0A0P5ECS0; A0A0N8AKQ7; A0A0P5KLT7; A0A0P5UT23; A0A0P5NG35; E9GVW7; A0A0P6EEN9; A0A0P5NEQ8; A0A0N8DYK4	1	1750	2.73	High	0	0.0001698
	FALSE	High	IEIFPAQQK		0.0373061	0	10	136	1	E9HZI6; A0A0P5BM18; A0A0P5M269; A0A0P5PPT4; A0A0P5XGU4; A0A0P5ECS0; A0A0N8AKQ7; A0A0P5UT23; A0A0P5YRE9; A0A0P5NEQ8	0	1073.6	2.15	High	0	0.02544
	FALSE	High	KTADNFIEVDSPISHMIR	1xOxidation [M16]	1.72514e-08	0	7	117	3	A0A0P5BM18; A0A0P5M269; A0A0P5XGU4; A0A0P5ECS0; A0A0N8AKQ7; A0A0P5UT23; A0A0P5YRE9	1	2089.04	5.75	High	0	1.876e-09
	FALSE	High	FQQNIYSSQTFR		0.0025825	0	9	122	1	A0A0P5BM18; A0A0P5M269; A0A0P5PPT4; A0A0P5XGU4; A0A0P5ECS0; A0A0N8AKQ7; A0A0P5UT23; A0A0P5YRE9; A0A0P5NEQ8	0	1518.73	3.85	High	0	0.001255
	FALSE	High	QREWSLYLDNASSETK		2.87507e-07	0	15	150	2	A0A0P5Z193; A0A0P5BM18; A0A0P5M269; A0A0P4YK27; A0A0P5GUJ5; A0A0P5I5B7; A0A0P5PPT4; A0A0P5PJQ0; A0A0P5XGU4; A0A0P6FTA8; A0A0P5ECS0; A0A0N8AKQ7; A0A0P5KLT7; A0A0P5UT23; A0A0P5YRE9	1	1926.92	5.66	High	0	4.445e-08
	FALSE	High	QREWSLYLDNASSETK	1xDeamidated [N10]	0.00402342	0	15	150	1	A0A0P5Z193; A0A0P5BM18; A0A0P5M269; A0A0P4YK27; A0A0P5GUJ5; A0A0P5I5B7; A0A0P5PPT4; A0A0P5PJQ0; A0A0P5XGU4; A0A0P6FTA8; A0A0P5ECS0; A0A0N8AKQ7; A0A0P5KLT7; A0A0P5UT23; A0A0P5YRE9	1	1927.9	3.59	High	0	0.002064
	FALSE	High	VNVNGMEISVTSESYTVK		3.20966e-06	0	8	124	1	A0A0P5BM18; A0A0P5M269; A0A0P5PPT4; A0A0P5XGU4; A0A0P5ECS0; A0A0N8AKQ7; A0A0P5YRE9; A0A0P5NEQ8	0	1956.96	3.79	High	0	6.725e-07
	FALSE	High	VNVNGMEISVTSESYTVK	1xDeamidated [N4]	4.57853e-07	0	8	124	1	A0A0P5BM18; A0A0P5M269; A0A0P5PPT4; A0A0P5XGU4; A0A0P5ECS0; A0A0N8AKQ7; A0A0P5YRE9; A0A0P5NEQ8	0	1957.94	3.67	High	0	7.503e-08
	FALSE	High	VNVNGMEISVTSESYTVK	1xOxidation [M6]	3.01596e-05	0	8	124	2	A0A0P5BM18; A0A0P5M269; A0A0P5PPT4; A0A0P5XGU4; A0A0P5ECS0; A0A0N8AKQ7; A0A0P5YRE9; A0A0P5NEQ8	0	1972.95	4.3	High	0	8.375e-06
	FALSE	High	VNVNGMEISVTSESYTVK	1xDeamidated [N4]; 1xOxidation [M6]	4.66922e-06	0	8	124	1	A0A0P5BM18; A0A0P5M269; A0A0P5PPT4; A0A0P5XGU4; A0A0P5ECS0; A0A0N8AKQ7; A0A0P5YRE9; A0A0P5NEQ8	0	1973.94	2.51	High	0	1.027e-06
	FALSE	High	NAENEVLAVIKK		0.00104535	0	9	122	1	E9HZI6; A0A0P5BM18; A0A0P5M269; A0A0P5PPT4; A0A0P5XGU4; A0A0P5ECS0; A0A0N8AKQ7; A0A0P5YRE9; A0A0P5NEQ8	1	1327.76	3.67	High	0	0.0004518
	FALSE	High	NAENEVLAVIKK	1xDeamidated [N]	0.000899057	0	9	122	3	E9HZI6; A0A0P5BM18; A0A0P5M269; A0A0P5PPT4; A0A0P5XGU4; A0A0P5ECS0; A0A0N8AKQ7; A0A0P5YRE9; A0A0P5NEQ8	1	1328.74	3.66	High	0	0.0003829
	FALSE	High	IQTTWETLGDK		0.00864996	0	15	156	2	A0A0P5Z193; A0A0P5BM18; A0A0P4YK27; A0A0P5GUJ5; A0A0P5I5B7; A0A0P5PPT4; A0A0P5PJQ0; A0A0P5XGU4; A0A0P6FTA8; A0A0P5ECS0; A0A0N8AKQ7; A0A0P5KLT7; A0A0P5NG35; A0A0P5NEQ8; A0A0N8DYK4	0	1291.65	2.58	High	0	0.004898
	FALSE	High	ITVATTWTR		0.0397517	0	9	144	2	A0A0P5Z193; A0A0P5BM18; A0A0P5PPT4; A0A0P5XGU4; A0A0P5ECS0; A0A0N8AKQ7; A0A0P5KLT7; A0A0P5YRE9; A0A0P5NEQ8	0	1048.58	2.72	High	0	0.02732
	FALSE	High	SLFDTVYGEQIMNK	1xOxidation [M12]	0.0161803	0	7	56	1	A0A0P5Z193; A0A0P5M269; A0A0P5I5B7; A0A0P5XGU4; A0A0P5KLT7; A0A0P5UT23; A0A0P5YRE9	0	1660.79	2.18	High	0	0.009907
	FALSE	High	EKSETVFGISDVSPLLPK		4.4254e-05	0	11	125	2	A0A0P5BM18; A0A0P5M269; A0A0P5PPT4; A0A0P5XGU4; A0A0P5ECS0; A0A0N8AKQ7; A0A0P5UT23; A0A0P5YRE9; E9GVW7; A0A0P5NEQ8; A0A0P5L1A1	1	1946.05	3.16	High	0	0.00153
	FALSE	High	LNEDLFVRPLDELMGK	1xOxidation [M14]	0.0113853	0	4	57	1	A0A0P5XGU4; A0A0P5ECS0; A0A0P5YRE9; A0A0P5L1A1	0	1904.98	2.61	High	0	0.006658
	FALSE	High	AIFALSTLAVQK		0.003613	0	12	127	2	A0A0P5Z193; A0A0P5BM18; A0A0P6FZL4; A0A0P4YK27; A0A0P5GUJ5; A0A0P5LYR5; A0A0P5XGU4; A0A0P6FTA8; A0A0P5ECS0; A0A0N8AKQ7; A0A0P5NEQ8; A0A0N8DYK4	0	1261.75	3.19	High	0	0.001831
	FALSE	High	AIFALSTLAVQK	1xDeamidated [Q11]	0.00546083	0	12	127	1	A0A0P5Z193; A0A0P5BM18; A0A0P6FZL4; A0A0P4YK27; A0A0P5GUJ5; A0A0P5LYR5; A0A0P5XGU4; A0A0P6FTA8; A0A0P5ECS0; A0A0N8AKQ7; A0A0P5NEQ8; A0A0N8DYK4	0	1262.74	2.41	High	0	0.002913
	FALSE	High	NAENEVLAVIK	1xDeamidated [N]	0.00203792	0	9	122	2	E9HZI6; A0A0P5BM18; A0A0P5M269; A0A0P5PPT4; A0A0P5XGU4; A0A0P5ECS0; A0A0N8AKQ7; A0A0P5YRE9; A0A0P5NEQ8	0	1200.65	3.27	High	0	0.0009605
	FALSE	High	GIEIHPVAEVILPK		0.000513541	0	6	108	2	A0A0P5BM18; A0A0P5PPT4; A0A0P5XGU4; A0A0P5ECS0; A0A0N8AKQ7; A0A0P5YRE9	0	1514.89	3.18	High	0	0.0004855
	FALSE	High	AKAIFALSTLAVQK		0.0317518	0	12	127	1	A0A0P5Z193; A0A0P5BM18; A0A0P6FZL4; A0A0P4YK27; A0A0P5GUJ5; A0A0P5LYR5; A0A0P5XGU4; A0A0P6FTA8; A0A0P5ECS0; A0A0N8AKQ7; A0A0P5NEQ8; A0A0N8DYK4	1	1460.88	2.09	High	0	0.02115
	FALSE	High	AIFALSTLAVQKK		9.08705e-05	0	12	127	1	A0A0P5Z193; A0A0P5BM18; A0A0P6FZL4; A0A0P4YK27; A0A0P5GUJ5; A0A0P5LYR5; A0A0P5XGU4; A0A0P6FTA8; A0A0P5ECS0; A0A0N8AKQ7; A0A0P5NEQ8; A0A0N8DYK4	1	1389.85	3.44	High	0	2.892e-05
	FALSE	High	AIFALSTLAVQKK	1xDeamidated [Q11]	0.000401727	0	12	127	2	A0A0P5Z193; A0A0P5BM18; A0A0P6FZL4; A0A0P4YK27; A0A0P5GUJ5; A0A0P5LYR5; A0A0P5XGU4; A0A0P6FTA8; A0A0P5ECS0; A0A0N8AKQ7; A0A0P5NEQ8; A0A0N8DYK4	1	1390.83	3.67	High	0	0.0001541
	FALSE	High	DLMDVAYELR		0.0185546	0	9	127	1	A0A0P5BM18; A0A0P5M269; A0A0P5PPT4; A0A0P5XGU4; A0A0P5ECS0; A0A0N8AKQ7; A0A0P5UT23; A0A0P5YRE9; A0A0P5NEQ8	0	1224.59	2.47	High	0	0.01156
	FALSE	High	EWSLYLDNASSETK		5.73083e-05	0	16	152	1	A0A0P5Z193; A0A0P5BM18; A0A0P5M269; A0A0P4YK27; A0A0P5GUJ5; A0A0P5I5B7; A0A0P5PPT4; A0A0P5PJQ0; A0A0P5XGU4; A0A0P6FTA8; A0A0P5ECS0; A0A0N8AKQ7; A0A0P5KLT7; A0A0P5UT23; A0A0P5YRE9; A0A0N8DYK4	0	1642.76	3.57	High	0	1.721e-05
	FALSE	High	EWSLYLDNASSETK	1xDeamidated [N8]	0.00133051	0	16	152	1	A0A0P5Z193; A0A0P5BM18; A0A0P5M269; A0A0P4YK27; A0A0P5GUJ5; A0A0P5I5B7; A0A0P5PPT4; A0A0P5PJQ0; A0A0P5XGU4; A0A0P6FTA8; A0A0P5ECS0; A0A0N8AKQ7; A0A0P5KLT7; A0A0P5UT23; A0A0P5YRE9; A0A0N8DYK4	0	1643.74	2.49	High	0	0.0005946
	FALSE	High	DLMDVAYELR	1xOxidation [M3]	0.0161111	0	9	127	1	A0A0P5BM18; A0A0P5M269; A0A0P5PPT4; A0A0P5XGU4; A0A0P5ECS0; A0A0N8AKQ7; A0A0P5UT23; A0A0P5YRE9; A0A0P5NEQ8	0	1240.59	3.03	High	0	0.009868
	FALSE	High	LCGLCGSQNGDK	2xCarbamidomethyl [C2; C5]	0.0014502	0	8	121	1	A0A0P5BM18; A0A0P5M269; A0A0P5PPT4; A0A0P5XGU4; A0A0P5ECS0; A0A0N8AKQ7; A0A0P5UT23; A0A0P5NEQ8	0	1308.57	2.4	High	0	0.0006534
	FALSE	High	LCGLCGSQNGDK	2xCarbamidomethyl [C2; C5]; 1xDeamidated [N9]	0.00150104	0	8	121	2	A0A0P5BM18; A0A0P5M269; A0A0P5PPT4; A0A0P5XGU4; A0A0P5ECS0; A0A0N8AKQ7; A0A0P5UT23; A0A0P5NEQ8	0	1309.55	2.68	High	0	0.0006812
	FALSE	High	IHEELKIEAR		0.00358203	0	19	168	2	E9HZI6; A0A0P5BM18; A0A0P5S327; A0A0P4YK27; A0A0P5GUJ5; A0A0P5I5B7; A0A0P5PPT4; A0A0P5PJQ0; A0A0P5XGU4; A0A0P6FTA8; A0A0P5ECS0; A0A0N8AKQ7; A0A0P5KLT7; A0A0P5UT23; A0A0P5NG35; E9GVW7; A0A0P6EEN9; A0A0P5NEQ8; A0A0N8DYK4	1	1237.69	3.92	High	0	0.00455
	FALSE	High	HSVVPFTTVRK		0.0297906	0	13	119	1	A0A0P5Z193; A0A0P5I0U9; A0A0P5BM18; A0A0P5GUJ5; A0A0P5PPT4; A0A0P5PJQ0; A0A0P5XGU4; A0A0P5ECS0; A0A0N8AKQ7; A0A0P5UT23; A0A0P5NEQ8; A0A0N8BQS0; A0A0N8DYK4	1	1270.73	3.18	High	0	0.01973
	FALSE	High	RPSQWTVYR		0.0129487	0	9	121	1	E9HZI6; A0A0P5BM18; A0A0P5M269; A0A0P5XGU4; A0A0P5ECS0; A0A0N8AKQ7; A0A0P5UT23; A0A0P5YRE9; A0A0P5NEQ8	0	1192.62	2.63	High	0	0.007689
	FALSE	High	CFSTESVPK	1xCarbamidomethyl [C1]	0.0514139	0	12	119	2	E9HZI6; A0A0P5BM18; A0A0P5M269; A0A0P5PPT4; A0A0P5XGU4; A0A0P5ECS0; A0A0N8AKQ7; A0A0P5UT23; A0A0P5YRE9; E9GVW7; A0A0P5NEQ8; A0A0P5L1A1	0	1054.49	2.58	High	0	0.03656
	FALSE	High	SKIEGGFSMSSLSAK	1xOxidation [M9]	0.00337255	0	1	25	2	A0A0P5XGU4	1	1544.76	3.68	High	0	0.005431
	FALSE	High	SETVFGISDVSPLLPK		0.000457151	0	11	125	1	A0A0P5BM18; A0A0P5M269; A0A0P5PPT4; A0A0P5XGU4; A0A0P5ECS0; A0A0N8AKQ7; A0A0P5UT23; A0A0P5YRE9; E9GVW7; A0A0P5NEQ8; A0A0P5L1A1	0	1688.91	3.32	High	0	0.0001781
	FALSE	High	QWAAALPGR		0.0566243	0	6	46	1	A0A0P5I5B7; A0A0P5PPT4; A0A0P5XGU4; A0A0N8AKQ7; A0A0P5KLT7; A0A0P5NG35	0	969.526	2.65	High	0	0.04066
	FALSE	High	RIGSSIVYGMDGK	1xOxidation [M10]	0.00503227	0	13	138	2	A0A0P5Z193; A0A0P5BM18; A0A0P4YK27; A0A0P5GUJ5; A0A0P5PPT4; A0A0P5PJQ0; A0A0P5XGU4; A0A0P5ECS0; A0A0N8AKQ7; A0A0P5KLT7; A0A0P5UT23; A0A0P5YRE9; A0A0P5NEQ8	1	1398.7	2.71	High	0.00329	0.126
	FALSE	High	DWFGTLAFAAMPSTIR	1xOxidation [M11]	0.000513541	0	10	114	2	A0A0P5Z193; A0A0P5BM18; A0A0P5GUJ5; A0A0P5PPT4; A0A0P5XGU4; A0A0P6FTA8; A0A0P5ECS0; A0A0N8AKQ7; A0A0P5UT23; A0A0P5NEQ8	0	1799.88	3.09	High	0	0.0002032
	FALSE	High	EIVGTLLMPIFFNK	1xOxidation [M8]	0.000105206	0	22	169	3	A0A0P5Z193; E9HZI6; A0A0P5BM18; A0A0P5S327; A0A0P6FZL4; A0A0P4YK27; A0A0P5IAS3; A0A0P5GUJ5; A0A0P5I5B7; A0A0P5LYR5; A0A0P5PJQ0; A0A0P5XGU4; A0A0P6FTA8; A0A0P5ECS0; A0A0N8AKQ7; A0A0P5KLT7; A0A0P5UT23; A0A0P5NG35; E9GVW7; A0A0P6EEN9; A0A0P5NEQ8; A0A0N8DYK4	0	1637.9	3.87	High	0	3.42e-05
	FALSE	High	EIVGTLLMPIFFNK		0.00626649	0	22	169	2	A0A0P5Z193; E9HZI6; A0A0P5BM18; A0A0P5S327; A0A0P6FZL4; A0A0P4YK27; A0A0P5IAS3; A0A0P5GUJ5; A0A0P5I5B7; A0A0P5LYR5; A0A0P5PJQ0; A0A0P5XGU4; A0A0P6FTA8; A0A0P5ECS0; A0A0N8AKQ7; A0A0P5KLT7; A0A0P5UT23; A0A0P5NG35; E9GVW7; A0A0P6EEN9; A0A0P5NEQ8; A0A0N8DYK4	0	1621.9	1.87	High	0	0.003393
	FALSE	High	LAALTLLFVSNPPQAFWSR		0.0037557	0	19	158	1	A0A0P5Z193; E9HZI6; A0A0P5BM18; A0A0P5S327; A0A0P6FZL4; A0A0P4YK27; A0A0P5GUJ5; A0A0P5I5B7; A0A0P5PJQ0; A0A0P5XGU4; A0A0P6FTA8; A0A0P5ECS0; A0A0N8AKQ7; A0A0P5KLT7; A0A0P5UT23; A0A0P5NG35; E9GVW7; A0A0P6EEN9; A0A0P5NEQ8	0	2131.17	2.48	High	0	0.001914
	FALSE	High	ATGQPELYIYLNFLDNYQR		7.26318e-05	0	21	168	1	A0A0P5Z193; E9HZI6; A0A0P5XPE2; A0A0P5BM18; A0A0P5S327; A0A0P4YK27; A0A0P5IAS3; A0A0P5GUJ5; A0A0P5I5B7; A0A0P5PPT4; A0A0P5PJQ0; A0A0P5XGU4; A0A0P5ECS0; A0A0N8AKQ7; A0A0P5KLT7; A0A0P5UT23; A0A0P5NG35; E9GVW7; A0A0P6EEN9; A0A0P5NEQ8; A0A0N8DYK4	0	2318.15	2.83	High	0	2.246e-05
	FALSE	High	LQEECLKEK	1xCarbamidomethyl [C5]	0.0554498	0	12	131	4	E9HZI6; A0A0P5BM18; A0A0P5M269; A0A0P5PPT4; A0A0P5XGU4; A0A0P5ECS0; A0A0N8AKQ7; A0A0P5UT23; A0A0P5YRE9; E9GVW7; A0A0P5NEQ8; A0A0P5L1A1	1	1176.59	2.03	High	0.00329	0.0946
	FALSE	High	GRLCGLCGSQNGDK	2xCarbamidomethyl [C4; C7]; 1xDeamidated [N11]	0.0394168	0	8	119	1	A0A0P5BM18; A0A0P5M269; A0A0P5PPT4; A0A0P5XGU4; A0A0P5ECS0; A0A0N8AKQ7; A0A0P5UT23; A0A0P5NEQ8	1	1522.67	2.71	High	0	0.027
	FALSE	High	GRLCGLCGSQNGDK	2xCarbamidomethyl [C4; C7]	0.0202972	0	8	119	1	A0A0P5BM18; A0A0P5M269; A0A0P5PPT4; A0A0P5XGU4; A0A0P5ECS0; A0A0N8AKQ7; A0A0P5UT23; A0A0P5NEQ8	1	1521.69	2.46	High	0	0.0128
	FALSE	High	LSYVEEPKENK		0.00320277	0	11	108	4	A0A0P5Z193; A0A0P5XPE2; A0A0P5BM18; A0A0P4YK27; A0A0P5I5B7; A0A0P5PJQ0; A0A0P5XGU4; A0A0P5ECS0; A0A0P5KLT7; A0A0P5UT23; A0A0N8DYK4	1	1335.68	2.92	High	0	0.001599
	FALSE	High	RLSYVEEPKENK		0.00971345	0	11	108	4	A0A0P5Z193; A0A0P5XPE2; A0A0P5BM18; A0A0P4YK27; A0A0P5I5B7; A0A0P5PJQ0; A0A0P5XGU4; A0A0P5ECS0; A0A0P5KLT7; A0A0P5UT23; A0A0N8DYK4	2	1491.78	3.37	High	0	0.005556
	FALSE	High	GMSDECIAAR	1xCarbamidomethyl [C6]; 1xOxidation [M2]	0.00498916	0	6	83	1	A0A0P5Z193; A0A0P5BM18; A0A0P5M269; A0A0P5XGU4; A0A0P5ECS0; A0A0P5YRE9	0	1125.47	2.3	High	0	0.002629
	FALSE	High	VANKNPLNREETVR		0.00482037	0	18	159	2	A0A0P5BM18; A0A0P5S327; A0A0P6FZL4; A0A0P4YK27; A0A0P5IAS3; A0A0P5GUJ5; A0A0P5I5B7; A0A0P5PJQ0; A0A0P5XGU4; A0A0P6FTA8; A0A0P5ECS0; A0A0N8AKQ7; A0A0P5KLT7; A0A0P5UT23; A0A0P5NG35; A0A0P6EEN9; A0A0P5NEQ8; A0A0N8DYK4	2	1639.89	2.96	High	0	0.002533
	FALSE	High	VANKNPLNREETVR	1xDeamidated [N]	0.0275941	0	18	159	2	A0A0P5BM18; A0A0P5S327; A0A0P6FZL4; A0A0P4YK27; A0A0P5IAS3; A0A0P5GUJ5; A0A0P5I5B7; A0A0P5PJQ0; A0A0P5XGU4; A0A0P6FTA8; A0A0P5ECS0; A0A0N8AKQ7; A0A0P5KLT7; A0A0P5UT23; A0A0P5NG35; A0A0P6EEN9; A0A0P5NEQ8; A0A0N8DYK4	2	1640.87	2.08	High	0	0.01806
	FALSE	High	EKIEIFPAQQK		0.0100529	0	10	136	1	E9HZI6; A0A0P5BM18; A0A0P5M269; A0A0P5PPT4; A0A0P5XGU4; A0A0P5ECS0; A0A0N8AKQ7; A0A0P5UT23; A0A0P5YRE9; A0A0P5NEQ8	1	1330.74	2.7	High	0	0.005796
	FALSE	High	IEGGFSMSSLSAK	1xOxidation [M7]	0.00271943	0	1	25	1	A0A0P5XGU4	0	1329.64	2.94	High	0	0.00133
	FALSE	High	HSVVPFTTVR		0.0110959	0	13	120	1	A0A0P5Z193; A0A0P5I0U9; A0A0P5BM18; A0A0P5GUJ5; A0A0P5PPT4; A0A0P5PJQ0; A0A0P5XGU4; A0A0P5ECS0; A0A0N8AKQ7; A0A0P5UT23; A0A0P5NEQ8; A0A0N8BQS0; A0A0N8DYK4	0	1142.63	2.74	High	0	0.006459
	FALSE	High	SNKDESSIISPELEK		3.41579e-07	0	16	145	2	A0A0P5Z193; A0A0P5XPE2; A0A0P5BM18; A0A0P5S327; A0A0P4YK27; A0A0P5IAS3; A0A0P5GUJ5; A0A0P5I5B7; A0A0P5PJQ0; A0A0P5XGU4; A0A0P6FTA8; A0A0P5ECS0; A0A0P5UT23; A0A0P6EEN9; A0A0P5NEQ8; A0A0N8DYK4	1	1675.84	4.32	High	0	5.409e-08
	FALSE	High	KIVTVLLNK		0.0132861	0	9	142	1	A0A0P5BM18; A0A0P5M269; A0A0P5PPT4; A0A0P5XGU4; A0A0P5ECS0; A0A0N8AKQ7; A0A0P5UT23; A0A0P5YRE9; A0A0P5NEQ8	1	1027.69	3.37	High	0	0.007914
	FALSE	High	GRLCGLCGSQNGDKVTDLTGPR	2xCarbamidomethyl [C4; C7]; 1xDeamidated [N/Q]	2.08925e-09	0	7	106	4	A0A0P5BM18; A0A0P5M269; A0A0P5PPT4; A0A0P5XGU4; A0A0P5ECS0; A0A0N8AKQ7; A0A0P5UT23	2	2362.12	6.69	High	0	1.945e-07
	FALSE	High	AESEDWEDEALCNLVR	1xCarbamidomethyl [C12]	1.02918e-06	0	16	156	1	A0A0P5Z193; A0A0P5BM18; A0A0P4YK27; A0A0P5IAS3; A0A0P5I5B7; A0A0P5LYR5; A0A0P5PJQ0; A0A0P5XGU4; A0A0P6FTA8; A0A0P5ECS0; A0A0N8AKQ7; A0A0P5KLT7; A0A0P5UT23; A0A0P5NG35; A0A0P5NEQ8; A0A0N8DYK4	0	1935.84	4.34	High	0	1.871e-07
	FALSE	High	LAVVQPSVYSK		0.00621283	0	14	125	2	A0A0P5Z193; A0A0P5I0U9; A0A0P5BM18; A0A0P4YK27; A0A0P5GUJ5; A0A0P5PPT4; A0A0P5PJQ0; A0A0P5XGU4; A0A0P6FTA8; A0A0P5ECS0; A0A0N8AKQ7; A0A0P5NEQ8; A0A0N8BQS0; A0A0N8DYK4	0	1190.68	3.16	High	0	0.003369
	FALSE	High	LCGLCGSQNGDKVTDLTGPR	2xCarbamidomethyl [C2; C5]	1.06274e-07	0	7	108	2	A0A0P5BM18; A0A0P5M269; A0A0P5PPT4; A0A0P5XGU4; A0A0P5ECS0; A0A0N8AKQ7; A0A0P5UT23	1	2148.02	4.89	High	0	6.056e-07
	FALSE	High	LCGLCGSQNGDKVTDLTGPR	2xCarbamidomethyl [C2; C5]; 1xDeamidated [N9]	8.15183e-09	0	7	108	4	A0A0P5BM18; A0A0P5M269; A0A0P5PPT4; A0A0P5XGU4; A0A0P5ECS0; A0A0N8AKQ7; A0A0P5UT23	1	2149	6.14	High	0	8.091e-10
	FALSE	High	IGSSIVYGMDGK	1xOxidation [M9]	0.00385394	0	13	138	1	A0A0P5Z193; A0A0P5BM18; A0A0P4YK27; A0A0P5GUJ5; A0A0P5PPT4; A0A0P5PJQ0; A0A0P5XGU4; A0A0P5ECS0; A0A0N8AKQ7; A0A0P5KLT7; A0A0P5UT23; A0A0P5YRE9; A0A0P5NEQ8	0	1242.6	3.29	High	0	0.001964
	FALSE	High	FKSNKDESSIISPELEK		1.6924e-07	0	16	144	3	A0A0P5Z193; A0A0P5XPE2; A0A0P5BM18; A0A0P5S327; A0A0P4YK27; A0A0P5IAS3; A0A0P5GUJ5; A0A0P5I5B7; A0A0P5PJQ0; A0A0P5XGU4; A0A0P6FTA8; A0A0P5ECS0; A0A0P5UT23; A0A0P6EEN9; A0A0P5NEQ8; A0A0N8DYK4	2	1951	5.15	High	0	2.455e-08
	FALSE	High	AVMTIKYNEMPAVVR	2xOxidation [M3; M10]	0.0313497	0	11	151	1	A0A0P5Z193; A0A0P5BM18; A0A0P5M269; A0A0P5PPT4; A0A0P5XGU4; A0A0P5ECS0; A0A0N8AKQ7; A0A0P5KLT7; A0A0P5UT23; A0A0P5YRE9; A0A0P5NEQ8	1	1753.9	2.67	High	0	0.02089
	FALSE	High	ISYVEEPKENKVTFGEK		0.000116666	0	7	67	4	A0A0P5XPE2; A0A0P5BM18; A0A0P4YK27; A0A0P5XGU4; A0A0P5ECS0; A0A0P5UT23; A0A0N8DYK4	2	1997.02	4.03	High	0	4.26e-05
	FALSE	High	LSYVEEPKENKVTFGEK	1xDeamidated [N10]	0.00355133	0	7	67	2	A0A0P5XPE2; A0A0P5BM18; A0A0P4YK27; A0A0P5XGU4; A0A0P5ECS0; A0A0P5UT23; A0A0N8DYK4	2	1998.01	3.06	High	0	0.00179
	FALSE	High	IVTVLLNKEK		0.062344	0	9	139	1	A0A0P5BM18; A0A0P5M269; A0A0P5PPT4; A0A0P5XGU4; A0A0P5ECS0; A0A0N8AKQ7; A0A0P5UT23; A0A0P5YRE9; A0A0P5NEQ8	1	1156.73	2.18	High	0	0.04544
	FALSE	High	FFTINPNTIFR		0.00643025	0	19	164	3	A0A0P5XPE2; A0A0P5BM18; A0A0P5S327; A0A0P4YK27; A0A0P5IAS3; A0A0P5I5B7; A0A0P5PPT4; A0A0P5PJQ0; A0A0P5XGU4; A0A0P6FTA8; A0A0P5ECS0; A0A0N8AKQ7; A0A0P5R4V4; A0A0P5KLT7; A0A0P5UT23; A0A0P5NG35; A0A0P6EEN9; A0A0P5NEQ8; A0A0N8DYK4	0	1369.73	2.68	High	0	0.004597
	FALSE	High	IEGALKPVVVSK		0.000210513	0	13	162	6	A0A0P5XPE2; A0A0P5BM18; A0A0P5I5B7; A0A0P5PPT4; A0A0P5XGU4; A0A0P6FTA8; A0A0P5ECS0; A0A0N8AKQ7; A0A0P5KLT7; A0A0P5NG35; A0A0P5NEQ8; A0A0N8BQS0; A0A0N8DYK4	0	1239.77	3.92	High	0	7.445e-05
	FALSE	High	SEEDISPSLR		0.0253406	0	9	129	1	A0A0P5Z193; A0A0P5BM18; A0A0P5PPT4; A0A0P5XGU4; A0A0P5ECS0; A0A0N8AKQ7; A0A0P5KLT7; A0A0P5YRE9; A0A0P5NEQ8	0	1132.55	2.73	High	0	0.01641
	FALSE	High	LMEISIDSK		0.0556828	0	17	161	1	A0A0P5Z193; A0A0P5XPE2; A0A0P5BM18; A0A0P5S327; A0A0P5GUJ5; A0A0P5I5B7; A0A0P5PPT4; A0A0P5PJQ0; A0A0P5XGU4; A0A0P6FTA8; A0A0P5ECS0; A0A0N8AKQ7; A0A0P5KLT7; A0A0P5UT23; A0A0P5NG35; A0A0P6EEN9; A0A0P5NEQ8	0	1035.54	2.39	High	0	0.03997
	FALSE	High	LMEISIDSK	1xOxidation [M2]	0.0476639	0	17	161	1	A0A0P5Z193; A0A0P5XPE2; A0A0P5BM18; A0A0P5S327; A0A0P5GUJ5; A0A0P5I5B7; A0A0P5PPT4; A0A0P5PJQ0; A0A0P5XGU4; A0A0P6FTA8; A0A0P5ECS0; A0A0N8AKQ7; A0A0P5KLT7; A0A0P5UT23; A0A0P5NG35; A0A0P6EEN9; A0A0P5NEQ8	0	1051.53	2.43	High	0	0.03344
	FALSE	High	YNEMPAVVR		0.0851047	0.000973478	11	152	1	A0A0P5Z193; A0A0P5BM18; A0A0P5M269; A0A0P5PPT4; A0A0P5XGU4; A0A0P5ECS0; A0A0N8AKQ7; A0A0P5KLT7; A0A0P5UT23; A0A0P5YRE9; A0A0P5NEQ8	0	1078.53	2.45	High	0.0007147	0.06469
	FALSE	High	RCFSTESVPK	1xCarbamidomethyl [C2]	0.080995	0.000973478	12	119	1	E9HZI6; A0A0P5BM18; A0A0P5M269; A0A0P5PPT4; A0A0P5XGU4; A0A0P5ECS0; A0A0N8AKQ7; A0A0P5UT23; A0A0P5YRE9; E9GVW7; A0A0P5NEQ8; A0A0P5L1A1	1	1210.59	2.99	High	0.0007147	0.06121
	FALSE	High	YNEMPAVVR	1xOxidation [M4]	0.0721274	0.000973478	11	152	1	A0A0P5Z193; A0A0P5BM18; A0A0P5M269; A0A0P5PPT4; A0A0P5XGU4; A0A0P5ECS0; A0A0N8AKQ7; A0A0P5KLT7; A0A0P5UT23; A0A0P5YRE9; A0A0P5NEQ8	0	1094.53	2.47	High	0.0007147	0.05362
	FALSE	High	KITVATTWTR		0.0751824	0.000973478	9	142	2	A0A0P5Z193; A0A0P5BM18; A0A0P5PPT4; A0A0P5XGU4; A0A0P5ECS0; A0A0N8AKQ7; A0A0P5KLT7; A0A0P5YRE9; A0A0P5NEQ8	1	1176.67	3.33	High	0.008045	0.1851
	FALSE	High	QQDSQWESQK		0.115584	0.00283597	17	158	1	A0A0P5I0U9; E9HZI6; A0A0P5BM18; A0A0P5M269; A0A0P4YK27; A0A0P5GUJ5; A0A0P5I5B7; A0A0P5PPT4; A0A0P5PJQ0; A0A0P5XGU4; A0A0P5ECS0; A0A0N8AKQ7; A0A0P5KLT7; A0A0P5UT23; A0A0P5YRE9; E9GVW7; A0A0P5NEQ8	0	1263.56	1.69	High	0.002777	0.09138
	FALSE	High	LGFHCLPK	1xCarbamidomethyl [C5]	0.131449	0.00358207	12	122	1	E9HZI6; A0A0P5BM18; A0A0P5M269; A0A0P5PPT4; A0A0P5XGU4; A0A0P5ECS0; A0A0N8AKQ7; A0A0P5UT23; A0A0P5YRE9; E9GVW7; A0A0P5NEQ8; A0A0P5L1A1	0	971.513	2.23	High	0.00329	0.1058
	FALSE	High	ENAGKLDINFHK		0.121804	0.00358207	8	53	1	A0A0P5IAS3; A0A0P5I5B7; A0A0P5PPT4; A0A0P5XGU4; A0A0N8AKQ7; A0A0P5R4V4; A0A0P5KLT7; A0A0P5NG35	1	1385.72	2.02	High	0.00329	0.097
	FALSE	High	LMAETPFTR	1xOxidation [M2]	0.125783	0.00358207	6	50	1	A0A0P5I5B7; A0A0P5PPT4; A0A0P5XGU4; A0A0N8AKQ7; A0A0P5KLT7; A0A0P5NG35	0	1081.53	2.12	High	0.00329	0.1008
	FALSE	High	GIEIHPVAEVILPKR		0.146356	0.00358207	6	108	1	A0A0P5BM18; A0A0P5PPT4; A0A0P5XGU4; A0A0P5ECS0; A0A0N8AKQ7; A0A0P5YRE9	1	1671	1.8	High	0.00329	0.1196
	FALSE	High	IVTVLLNK		0.152253	0.00358207	9	145	2	A0A0P5BM18; A0A0P5M269; A0A0P5PPT4; A0A0P5XGU4; A0A0P5ECS0; A0A0N8AKQ7; A0A0P5UT23; A0A0P5YRE9; A0A0P5NEQ8	0	899.592	2.75	High	0.00329	0.1251
	FALSE	High	EIVGTLLMPIFFNKAEETEVR	1xOxidation [M8]	0.162767	0.00527855	21	163	1	A0A0P5Z193; E9HZI6; A0A0P5BM18; A0A0P6FZL4; A0A0P4YK27; A0A0P5IAS3; A0A0P5GUJ5; A0A0P5I5B7; A0A0P5LYR5; A0A0P5PJQ0; A0A0P5XGU4; A0A0P6FTA8; A0A0P5ECS0; A0A0N8AKQ7; A0A0P5KLT7; A0A0P5UT23; A0A0P5NG35; E9GVW7; A0A0P6EEN9; A0A0P5NEQ8; A0A0N8DYK4	1	2452.28	1.46	High	0.004515	0.1346
	FALSE	High	LSYVEEPK		0.184315	0.00607653	11	108	2	A0A0P5Z193; A0A0P5XPE2; A0A0P5BM18; A0A0P4YK27; A0A0P5I5B7; A0A0P5PJQ0; A0A0P5XGU4; A0A0P5ECS0; A0A0P5KLT7; A0A0P5UT23; A0A0N8DYK4	0	964.499	1.97	High	0.005091	0.1552
	FALSE	High	LVGKPGLR		0.185741	0.00607653	19	162	1	A0A0P5Z193; E9HZI6; A0A0P5BM18; A0A0P5S327; A0A0P5GUJ5; A0A0P5I5B7; A0A0P5PPT4; A0A0P5PJQ0; A0A0P5XGU4; A0A0P6FTA8; A0A0P5ECS0; A0A0N8AKQ7; A0A0P5KLT7; A0A0P5UT23; A0A0P5NG35; E9GVW7; A0A0P6EEN9; A0A0P5NEQ8; A0A0N8DYK4	0	839.546	1.78	High	0.005091	0.1564
	FALSE	High	VTDLTGPR		0.19825	0.00767163	10	120	1	E9HZI6; A0A0P5BM18; A0A0P5M269; A0A0P5PPT4; A0A0P5XGU4; A0A0P5ECS0; A0A0N8AKQ7; A0A0P5UT23; A0A0P5YRE9; E9GVW7	0	858.468	2.15	High	0.006261	0.1686
FALSE	High	Master Protein	A0A0P6ALQ8	Vitellogenin-1 OS=Daphnia magna PE=4 SV=1	0	375.886	50.9349	67	116	3	1	1551	171.1	8.84	358.35	67
	Checked	Confidence	Sequence	Modifications	Qvality PEP	Qvality q-value	# Protein Groups	# Proteins	# PSMs	Master Protein Accessions	# Missed Cleavages	Theo. MH+ [Da]	XCorr Sequest HT	Confidence Sequest HT	Percolator q-Value Sequest HT	Percolator PEP Sequest HT
	FALSE	High	IYAGGHTLELNPVSSGVEVK		1.48081e-07	0	5	49	4	A0A0P6GLG4; A0A0P5PVY3; A0A0P6I5H6; A0A0P5VU45; A0A0P6ALQ8	0	2070.09	6.04	High	0	2.113e-08
	FALSE	High	AGFVGICDVAPK	1xCarbamidomethyl [C7]	0.000950839	0	8	89	1	A0A0P5ICU5; A0A0P6GLG4; A0A0P5PVY3; E9G583; A0A0P6I5H6; A0A0P5VU45; A0A0P6ALQ8; A0A0P5NAS6	0	1233.63	3.18	High	0	0.0004073
	FALSE	High	TTGPSLPLAVK		0.0322959	0	6	70	1	A0A0P5ICU5; A0A0P6GLG4; A0A0P5PVY3; E9G583; A0A0P6I5H6; A0A0P6ALQ8	0	1083.64	2.32	High	0	0.02156
	FALSE	High	MVAFIPYYLR	1xOxidation [M1]	0.00575007	0	3	44	2	E9GNT0; E9G583; A0A0P6ALQ8	0	1288.68	2.74	High	0	0.003084
	FALSE	High	MVAFLPYYLR		0.0531712	0	3	44	2	E9GNT0; E9G583; A0A0P6ALQ8	0	1272.68	1.81	High	0	0.03796
	FALSE	High	GAITLLGTPER		0.0460839	0	5	81	1	A0A0P6CV29; A0A0P6GLG4; A0A0P6I5H6; A0A0P6ALQ8; A0A0P5NAS6	0	1127.64	2.73	High	0	0.03224
	FALSE	High	CKENIPTPPCVAEPLSIGER	2xCarbamidomethyl [C1; C10]	0.000118184	0	5	32	2	A0A0P5ICU5; A0A0P5ZGA6; A0A0P6GLG4; A0A0P6I5H6; A0A0P6ALQ8	1	2267.12	4.97	High	0	3.889e-05
	FALSE	High	LSDVTLGMHNGPDSLLSTVK		2.57039e-07	0	1	22	2	A0A0P6ALQ8	0	2084.07	6.06	High	0	3.929e-08
	FALSE	High	LSDVTLGMHNGPDSLLSTVK	1xOxidation [M8]	3.63681e-06	0	1	22	2	A0A0P6ALQ8	0	2100.06	5.53	High	0	9.332e-07
	FALSE	High	LSDVTLGMHNGPDSLLSTVK	1xDeamidated [N10]; 1xOxidation [M8]	4.02521e-05	0	1	22	1	A0A0P6ALQ8	0	2101.05	4.64	High	0	1.158e-05
	FALSE	High	SGSVPHAVRPHVIFALQPIAAVNR		0.00685859	0	5	53	1	A0A0P4YJX7; A0A0P6GLG4; E9G583; A0A0P6ALQ8; A0A0P5NAS6	0	2536.43	2.76	High	0	0.003771
	FALSE	High	LDTLKDLLQK		0.00174525	0	7	52	2	A0A0P4YJX7; A0A0P6GLG4; E9GNT0; E9G583; A0A0P4X6K5; A0A0P6ALQ8; A0A0P5NAS6	1	1186.7	4.17	High	0	0.0008077
	FALSE	High	LQMDVVAGEIGKGDTAFLR		1.53343e-05	0	2	39	1	E9G583; A0A0P6ALQ8	1	2020.05	4.49	High	0	3.917e-06
	FALSE	High	YGFGGGLQLATIYGEESR		2.18742e-06	0	4	56	1	A0A0P4YJX7; E9G583; A0A0P4X6K5; A0A0P6ALQ8	0	1917.93	4.55	High	0	4.372e-07
	FALSE	High	THPEMIVALSTLR		0.00140109	0	6	55	1	A0A0P4YJX7; A0A0P6GLG4; A0A0P5K2V7; E9G583; A0A0P6ALQ8; A0A0P5NAS6	0	1467.8	2.48	High	0	0.0006286
	FALSE	High	THPEMIVALSTLR	1xOxidation [M5]	0.00448039	0	6	55	2	A0A0P4YJX7; A0A0P6GLG4; A0A0P5K2V7; E9G583; A0A0P6ALQ8; A0A0P5NAS6	0	1483.79	4.01	High	0	0.002324
	FALSE	High	SQDELVATTQLYYQLSR		0.00133625	0	1	25	1	A0A0P6ALQ8	0	2015.01	3.03	High	0	0.000596
	FALSE	High	ISEYSYVPLEIMIR	1xOxidation [M12]	0.00207333	0	3	32	1	A0A0P6GLG4; A0A0P6ALQ8; A0A0P5NAS6	0	1728.89	2.33	High	0	0.0009763
	FALSE	High	ISEYSYVPLEIMIR		0.0151088	0	3	32	1	A0A0P6GLG4; A0A0P6ALQ8; A0A0P5NAS6	0	1712.89	2.39	High	0	0.009159
	FALSE	High	LQMDVVAGEIGKGDTAFLR	1xOxidation [M3]	6.35227e-07	0	2	39	1	E9G583; A0A0P6ALQ8	1	2036.05	4.99	High	0	1.086e-07
	FALSE	High	ENIPTPPCVAEPLSIGER	1xCarbamidomethyl [C8]	0.000216958	0	5	32	1	A0A0P5ICU5; A0A0P5ZGA6; A0A0P6GLG4; A0A0P6I5H6; A0A0P6ALQ8	0	1978.99	3.25	High	0	7.707e-05
	FALSE	High	ANDAGLPVGVGLSTPGFAR		1.48434e-06	0	4	63	2	A0A0P6GLG4; A0A0P5PVY3; A0A0P6I5H6; A0A0P6ALQ8	0	1798.94	5.11	High	0	2.827e-07
	FALSE	High	ANDAGLPVGVGLSTPGFAR	1xDeamidated [N2]	0.00125806	0	4	63	1	A0A0P6GLG4; A0A0P5PVY3; A0A0P6I5H6; A0A0P6ALQ8	0	1799.93	3.03	High	0	0.0005582
	FALSE	High	DNVIQYIVVSK		0.0219192	0	6	36	1	A0A0P5ICU5; A0A0P6GLG4; A0A0P5PVY3; E9G583; A0A0P6I5H6; A0A0P6ALQ8	0	1277.71	1.73	High	0	0.01394
	FALSE	High	WNVEVNVESEPFNVK		3.57467e-06	0	6	69	1	A0A0P6CV29; A0A0P6GLG4; A0A0P5PVY3; A0A0P6I5H6; A0A0P6ALQ8; A0A0P5NAS6	0	1789.88	4.47	High	0	7.587e-07
	FALSE	High	YFVQVPVLK		0.0273602	0	6	60	1	A0A0P5ZGA6; A0A0P6GLG4; A0A0P5PVY3; E9G583; A0A0P6I5H6; A0A0P6ALQ8	0	1092.65	2.31	High	0	0.01786
	FALSE	High	DFKLDTLKDLLQK		3.24515e-05	0	5	49	2	A0A0P6GLG4; E9G583; A0A0P4X6K5; A0A0P6ALQ8; A0A0P5NAS6	2	1576.89	4.82	High	0	9.11e-06
	FALSE	High	ITGFDADASDAEWSINIK		2.77766e-07	0	2	38	1	E9G583; A0A0P6ALQ8	0	1952.92	5.27	High	0	4.287e-08
	FALSE	High	NPCVKPIANQLQLLLR	1xCarbamidomethyl [C3]	0.000457151	0	2	34	1	A0A0P6GLG4; A0A0P6ALQ8	0	1877.08	3.22	High	0	0.0001788
	FALSE	High	SYVLDIQYANMSPR		0.000150431	0	4	51	1	A0A0P6GLG4; A0A0P6I5H6; A0A0P5VU45; A0A0P6ALQ8	0	1656.81	4.38	High	0	5.098e-05
	FALSE	High	SYVLDIQYANMSPR	1xDeamidated [N10]; 1xOxidation [M11]	0.000294591	0	4	51	1	A0A0P6GLG4; A0A0P6I5H6; A0A0P5VU45; A0A0P6ALQ8	0	1673.78	2.86	High	0	0.0001089
	FALSE	High	ITGFDADASDAEWSINIKK		1.82535e-06	0	2	38	2	E9G583; A0A0P6ALQ8	1	2081.02	4	High	0	2.888e-06
	FALSE	High	KWNVEVNVESEPFNVK		3.96408e-06	0	6	69	2	A0A0P6CV29; A0A0P6GLG4; A0A0P5PVY3; A0A0P6I5H6; A0A0P6ALQ8; A0A0P5NAS6	1	1917.97	4.85	High	0	9.134e-05
	FALSE	High	NQEVLNFMMTTFR	1xOxidation [M]	0.000950839	0	5	48	2	A0A0P6GLG4; E9G583; A0A0P4X6K5; A0A0P6ALQ8; A0A0P5NAS6	0	1646.77	3.3	High	0	0.0004062
	FALSE	High	NQEVLNFMMTTFR	2xOxidation [M8; M9]	0.00159433	0	5	48	2	A0A0P6GLG4; E9G583; A0A0P4X6K5; A0A0P6ALQ8; A0A0P5NAS6	0	1662.76	2.78	High	0	0.0007296
	FALSE	High	SGIVGPMTQACYEAVLHYATPR	1xCarbamidomethyl [C11]; 1xOxidation [M7]	8.98366e-08	0	6	60	1	A0A0P6GLG4; A0A0P5PVY3; E9G583; A0A0P6I5H6; A0A0P6ALQ8; A0A0P5NAS6	0	2437.16	4.72	High	0	1.201e-08
	FALSE	High	EVSFVWGEAPADQCPK	1xCarbamidomethyl [C14]	0.00262736	0	6	54	1	A0A0P6GLG4; A0A0P5PVY3; A0A0P5P4Y7; A0A0P6I5H6; A0A0P6ALQ8; A0A0P5NAS6	0	1819.83	2.94	High	0	0.001278
	FALSE	High	VDNNKPYVLSDKDNVIQYIVVSK		2.74199e-07	0	4	24	2	A0A0P6GLG4; A0A0P5PVY3; A0A0P6I5H6; A0A0P6ALQ8	1	2650.41	5.38	High	0	5.414e-07
	FALSE	High	VDNNKPYVLSDKDNVIQYIVVSK	1xDeamidated [N]	0.000128819	0	4	24	2	A0A0P6GLG4; A0A0P5PVY3; A0A0P6I5H6; A0A0P6ALQ8	1	2651.39	4.14	High	0	5.205e-05
	FALSE	High	VDNNKPYVLSDKDNVIQYIVVSK	2xDeamidated [N4; N14]	0.00334365	0	4	24	1	A0A0P6GLG4; A0A0P5PVY3; A0A0P6I5H6; A0A0P6ALQ8	1	2652.38	3.11	High	0	0.001673
	FALSE	High	ENINELLGMESHVEVYNCETYTGK	1xCarbamidomethyl [C18]; 1xOxidation [M9]	3.73205e-06	0	8	65	2	A0A0P6CV29; A0A0P6GLG4; A0A0P5PVY3; A0A0P5P4Y7; E9G583; A0A0P6I5H6; A0A0P6ALQ8; A0A0P5NAS6	0	2845.27	4.39	High	0	7.977e-07
	FALSE	High	ELVSPSGCNVK	1xCarbamidomethyl [C8]	0.00963039	0	6	50	1	A0A0P5ZGA6; A0A0P6GLG4; A0A0P5PVY3; E9G583; A0A0P6I5H6; A0A0P6ALQ8	0	1189.59	2.81	High	0	0.00552
	FALSE	High	VAGAGHIELK		0.00887579	0	8	83	2	A0A0P5ICU5; A0A0P6GLG4; A0A0P5PVY3; A0A164IBM4; A0A0P6I5H6; A0A0P5VU45; A0A0P6ALQ8; A0A0P5NAS6	0	994.568	3.06	High	0	0.005038
	FALSE	High	LLTSWEDLLK		0.0228751	0	3	61	1	A0A0P6GLG4; E9G583; A0A0P6ALQ8	0	1217.68	2.04	High	0	0.01461
	FALSE	High	QQAPMKMEILLR	2xOxidation [M5; M7]	0.0511983	0	4	56	2	A0A0P6GLG4; E9G583; A0A0P4X6K5; A0A0P6ALQ8	1	1489.79	2.45	High	0	0.03633
	FALSE	High	ALSYLKDTCSECESK	2xCarbamidomethyl [C9; C12]	9.50548e-06	0	5	63	1	A0A0P6GLG4; A0A0P5PVY3; A0A0P5P4Y7; A0A0P6I5H6; A0A0P6ALQ8	1	1790.79	4.39	High	0	2.282e-06
	FALSE	High	HMGMEEIAGLMEGK	2xOxidation [M4; M11]	0.0578229	0	3	52	2	A0A0P6GLG4; A0A0P6ALQ8; A0A0P5NAS6	0	1564.68	2.19	High	0	0.04167
	FALSE	High	HMGMEEIAGLMEGK	3xOxidation [M2; M4; M11]	0.000883698	0	3	52	2	A0A0P6GLG4; A0A0P6ALQ8; A0A0P5NAS6	0	1580.68	4.42	High	0	0.001171
	FALSE	High	TAWAALPEDIFETPSSIEPSVQR		7.84886e-05	0	5	28	2	A0A0P6GLG4; A0A0P5PVY3; A0A0P5P4Y7; A0A0P6I5H6; A0A0P6ALQ8	0	2544.26	3.59	High	0	2.453e-05
	FALSE	High	KVAGAGHLELK		0.00100128	0	8	82	4	A0A0P5ICU5; A0A0P6GLG4; A0A0P5PVY3; A0A164IBM4; A0A0P6I5H6; A0A0P5VU45; A0A0P6ALQ8; A0A0P5NAS6	1	1122.66	4.21	High	0	0.000676
	FALSE	High	TQSECTNVPR	1xCarbamidomethyl [C5]	0.0191183	0	3	47	1	A0A0P6GLG4; E9G583; A0A0P6ALQ8	0	1191.54	1.56	High	0	0.01193
	FALSE	High	MGHNSFGATNCAGK	1xCarbamidomethyl [C11]	0.0266699	0	2	46	1	A0A0P6GLG4; A0A0P6ALQ8	0	1451.62	2.51	High	0	0.01738
	FALSE	High	MGHNSFGATNCAGK	1xCarbamidomethyl [C11]; 1xDeamidated [N4]	0.0520662	0	2	46	1	A0A0P6GLG4; A0A0P6ALQ8	0	1452.6	2.32	High	0	0.03704
	FALSE	High	MGHNSFGATNCAGK	1xCarbamidomethyl [C11]; 1xOxidation [M1]	0.0157025	0	2	46	1	A0A0P6GLG4; A0A0P6ALQ8	0	1467.61	2.02	High	0	0.009563
	FALSE	High	LKMDSAVPAGK	1xOxidation [M3]	0.0329889	0	7	85	1	A0A0P6CV29; A0A0P6GLG4; A0A0P5PVY3; A0A0P5P4Y7; A0A0P6I5H6; A0A0P6ALQ8; A0A0P5NAS6	1	1132.6	1.78	High	0	0.02212
	FALSE	High	HQLAYGNVNQPTK		0.00731536	0	3	56	1	A0A0P6GLG4; A0A0P6I5H6; A0A0P6ALQ8	0	1469.75	3.58	High	0	0.004052
	FALSE	High	VQGNITEAQR		0.00605459	0	6	47	1	A0A0P6GLG4; A0A0P5PVY3; E9G583; A0A0P6I5H6; A0A0P6ALQ8; A0A0P5NAS6	0	1115.58	1.84	High	0	0.003262
	FALSE	High	NVANDEELKNLFNEILPTTGTNPAALMVK	1xDeamidated [N]; 1xOxidation [M27]	0.0275941	0	2	25	3	A0A0P6GLG4; A0A0P6ALQ8	1	3173.6	2.24	High	0	0.01805
	FALSE	High	SQHCGLCGDYNGQFSR	2xCarbamidomethyl [C4; C7]	7.00046e-06	0	5	52	2	A0A0P5ZGA6; A0A0P6GLG4; A0A0P5PVY3; A0A0P6I5H6; A0A0P6ALQ8	0	1885.77	4.37	High	0	2.075e-05
	FALSE	High	GAITLLGTPERK		0.0014754	0	5	80	2	A0A0P6CV29; A0A0P6GLG4; A0A0P6I5H6; A0A0P6ALQ8; A0A0P5NAS6	1	1255.74	3.03	High	0	0.0006665
	FALSE	High	IHLPANLLVGFSPADSQVEIK		0.000160474	0	4	54	1	A0A0P6GLG4; A0A0P6I5H6; A0A0P6ALQ8; A0A0P5NAS6	0	2248.23	4.17	High	0	5.487e-05
	FALSE	High	KPELVTLEKPFK		3.6142e-05	0	1	37	2	A0A0P6ALQ8	0	1428.85	4.34	High	0	1.025e-05
	FALSE	High	LLTSWEDLLKESPSIK		8.97036e-05	0	3	56	1	A0A0P6GLG4; E9G583; A0A0P6ALQ8	1	1859.02	2.94	High	0	2.859e-05
	FALSE	High	LQMDVVAGEIGK	1xOxidation [M3]	0.00173028	0	2	41	1	E9G583; A0A0P6ALQ8	0	1275.66	2.85	High	0	0.0007994
	FALSE	High	LQMDVVAGEIGK		0.00226956	0	2	41	1	E9G583; A0A0P6ALQ8	0	1259.67	2.69	High	0	0.001082
	FALSE	High	KTTGPSLPLAVK		0.00828622	0	6	70	2	A0A0P5ICU5; A0A0P6GLG4; A0A0P5PVY3; E9G583; A0A0P6I5H6; A0A0P6ALQ8	1	1211.74	3.49	High	0	0.004654
	FALSE	High	YTGDDITSMIPATHR		6.00896e-05	0	6	52	2	A0A0P5ZGA6; A0A0P6GLG4; A0A0P5PVY3; E9G583; A0A0P6I5H6; A0A0P6ALQ8	0	1677.79	3.23	High	0	1.816e-05
	FALSE	High	YTGDDITSMIPATHR	1xOxidation [M9]	0.000378214	0	6	52	2	A0A0P5ZGA6; A0A0P6GLG4; A0A0P5PVY3; E9G583; A0A0P6I5H6; A0A0P6ALQ8	0	1693.79	3.67	High	0	0.0009647
	FALSE	High	LEGVEDAYVR		0.0210928	0	4	46	1	A0A0P6GLG4; E9G583; A0A0P6ALQ8; A0A0P5NAS6	0	1150.57	2.81	High	0	0.01335
	FALSE	High	LPMSQMFALK	1xOxidation [M3]	0.0146624	0	8	96	2	A0A0P5ICU5; A0A0P6GLG4; A0A0P5PVY3; E9G583; A0A0P6I5H6; A0A0P5VU45; A0A0P6ALQ8; A0A0P5NAS6	0	1181.61	2.25	High	0	0.008864
	FALSE	High	LPMSQMFAIK	2xOxidation [M3; M6]	0.0309525	0	8	96	2	A0A0P5ICU5; A0A0P6GLG4; A0A0P5PVY3; E9G583; A0A0P6I5H6; A0A0P5VU45; A0A0P6ALQ8; A0A0P5NAS6	0	1197.6	2.33	High	0	0.02062
	FALSE	High	NMVMLGGQHISWR	2xOxidation [M2; M4]	0.00103193	0	5	59	2	A0A0P6GLG4; A0A0P5PVY3; A0A0P6I5H6; A0A0P6ALQ8; A0A0P5NAS6	0	1560.74	3.77	High	0	0.0005016
	FALSE	High	SQHCGLCGDYNGQFSR	2xCarbamidomethyl [C4; C7]; 1xDeamidated [N11]	0.000323878	0	5	52	2	A0A0P5ZGA6; A0A0P6GLG4; A0A0P5PVY3; A0A0P6I5H6; A0A0P6ALQ8	0	1886.75	3.94	High	0	0.000121
	FALSE	High	TQVKPAEAIEIK		0.000290808	0	4	84	4	A0A0P6CV29; A0A0P6GLG4; A0A0P6I5H6; A0A0P6ALQ8	0	1326.76	3.48	High	0	0.000107
	FALSE	High	YGFGGGLQLATIYGEESRAPLIISGR	1xDeamidated [Q8]	0.0106298	0	3	47	1	E9G583; A0A0P4X6K5; A0A0P6ALQ8	1	2726.41	2.62	High	0	0.006158
	FALSE	High	SSGPIAKPISASGLTK		2.54343e-06	0	3	45	1	A0A0P6GLG4; E9G583; A0A0P6ALQ8	0	1513.86	4.33	High	0	5.181e-07
	FALSE	High	GAIALAFGHLIGITCSANR	1xCarbamidomethyl [C15]	0.000559749	0	2	49	1	A0A0P6GLG4; A0A0P6ALQ8	0	1942.03	2.96	High	0	0.0002238
	FALSE	High	MGHNSFGATNCAGK	1xCarbamidomethyl [C11]; 1xDeamidated [N4]; 1xOxidation [M1]	0.0851047	0.000973478	2	46	1	A0A0P6GLG4; A0A0P6ALQ8	0	1468.59	1.41	High	0.0007147	0.06472
	FALSE	High	APLLISGR		0.0803286	0.000973478	5	54	2	A0A0P6GLG4; E9G583; A0A0P4X6K5; A0A0P6I5H6; A0A0P6ALQ8	0	826.515	2.52	High	0.0007147	0.0605
	FALSE	High	NLFNEILPTTGTNPAALMVK	1xOxidation [M18]	0.111904	0.0018991	2	31	1	A0A0P6GLG4; A0A0P6ALQ8	0	2160.14	2	High	0.001394	0.08818
	FALSE	High	NVANDEELK		0.0986482	0.0018991	2	37	1	A0A0P6GLG4; A0A0P6ALQ8	0	1031.5	1.12	High	0.001394	0.07619
	FALSE	High	NTYPYDRCDLDR	1xCarbamidomethyl [C8]	0.115584	0.00283597	6	103	1	A0A0P6GLG4; A0A0P5PVY3; E9G583; A0A0P6I5H6; A0A0P6ALQ8; A0A0P5NAS6	1	1587.69	2.22	High	0.002777	0.09146
	FALSE	High	NTNLIPAIER		0.142917	0.00358207	6	56	1	A0A0P6GLG4; A0A0P5K2V7; E9G583; A0A0P4X6K5; A0A0P6ALQ8; A0A0P5NAS6	0	1140.64	2.36	High	0.00329	0.1161
	FALSE	High	VFDFQDQK		0.155893	0.00444016	4	57	1	E9G583; A0A0P6I5H6; A0A0P6ALQ8; A0A0P5NAS6	0	1026.49	2.21	High	0.003911	0.128
	FALSE	High	DFKLDTLK		0.156507	0.00444016	5	52	1	A0A0P6GLG4; E9G583; A0A0P4X6K5; A0A0P6ALQ8; A0A0P5NAS6	1	979.546	2.28	High	0.003911	0.1289
	FALSE	High	CDLDRTDAGR	1xCarbamidomethyl [C1]	0.212274	0.00932965	5	63	1	A0A0P6GLG4; A0A0P5PVY3; A0A0P6I5H6; A0A0P6ALQ8; A0A0P5NAS6	1	1178.52	1.16	High	0.007458	0.182
FALSE	High	Master Protein	A0A0P5NEQ8	Copper-zinc cu-zn superoxide dismutase OS=Daphnia magna PE=4 SV=1	0	356.181	46.7505	74	138	2	1	1431	161.4	7.61	386.89	74
	Checked	Confidence	Sequence	Modifications	Qvality PEP	Qvality q-value	# Protein Groups	# Proteins	# PSMs	Master Protein Accessions	# Missed Cleavages	Theo. MH+ [Da]	XCorr Sequest HT	Confidence Sequest HT	Percolator q-Value Sequest HT	Percolator PEP Sequest HT
	FALSE	High	LMVETPFSR		0.0294129	0	10	125	1	A0A0P5Z193; A0A0P5XPE2; A0A0P5BM18; A0A0P4YK27; A0A0P5GUJ5; A0A0P6FTA8; A0A0P5ECS0; A0A0P5UT23; A0A0P5NEQ8; A0A0N8DYK4	0	1079.56	2.44	High	0	0.01941
	FALSE	High	HLGMDFVFVER	1xOxidation [M4]	0.000872352	0	12	112	2	A0A0P5I0U9; A0A0P5BM18; A0A0P4YK27; A0A0P5GUJ5; A0A0P5PPT4; A0A0P5PJQ0; A0A0P5XGU4; A0A0P5ECS0; A0A0N8AKQ7; A0A0P5UT23; A0A0P5NEQ8; A0A0N8DYK4	0	1365.66	3.36	High	0	0.01263
	FALSE	High	HLGMDFVFVER		0.000610115	0	12	112	1	A0A0P5I0U9; A0A0P5BM18; A0A0P4YK27; A0A0P5GUJ5; A0A0P5PPT4; A0A0P5PJQ0; A0A0P5XGU4; A0A0P5ECS0; A0A0N8AKQ7; A0A0P5UT23; A0A0P5NEQ8; A0A0N8DYK4	0	1349.67	2.91	High	0	0.0002464
	FALSE	High	DESSIISPELEK		0.00455817	0	18	150	1	A0A0P5Z193; E9HZI6; A0A0P5XPE2; A0A0P5BM18; A0A0P5S327; A0A0P4YK27; A0A0P5IAS3; A0A0P5GUJ5; A0A0P5I5B7; A0A0P5PJQ0; A0A0P5XGU4; A0A0P6FTA8; A0A0P5ECS0; A0A0P5UT23; E9GVW7; A0A0P6EEN9; A0A0P5NEQ8; A0A0N8DYK4	0	1346.67	3.2	High	0	0.002369
	FALSE	High	VFKPYSNVFFR		0.0644609	0	7	111	1	A0A0P5BM18; A0A0P5PPT4; A0A0P5XGU4; A0A0P5ECS0; A0A0N8AKQ7; A0A0P5YRE9; A0A0P5NEQ8	0	1403.75	2.98	High	0	0.04722
	FALSE	High	IQTTWETLGDKLR		0.00029714	0	15	156	4	A0A0P5Z193; A0A0P5BM18; A0A0P4YK27; A0A0P5GUJ5; A0A0P5I5B7; A0A0P5PPT4; A0A0P5PJQ0; A0A0P5XGU4; A0A0P6FTA8; A0A0P5ECS0; A0A0N8AKQ7; A0A0P5KLT7; A0A0P5NG35; A0A0P5NEQ8; A0A0N8DYK4	1	1560.84	3.5	High	0	0.0001097
	FALSE	High	KEIVGTLLMPIFFNK	1xOxidation [M9]	1.70782e-05	0	22	169	2	A0A0P5Z193; E9HZI6; A0A0P5BM18; A0A0P5S327; A0A0P6FZL4; A0A0P4YK27; A0A0P5IAS3; A0A0P5GUJ5; A0A0P5I5B7; A0A0P5LYR5; A0A0P5PJQ0; A0A0P5XGU4; A0A0P6FTA8; A0A0P5ECS0; A0A0N8AKQ7; A0A0P5KLT7; A0A0P5UT23; A0A0P5NG35; E9GVW7; A0A0P6EEN9; A0A0P5NEQ8; A0A0N8DYK4	1	1765.99	4.02	High	0	4.421e-06
	FALSE	High	KEIVGTLLMPIFFNK		0.000437875	0	22	169	1	A0A0P5Z193; E9HZI6; A0A0P5BM18; A0A0P5S327; A0A0P6FZL4; A0A0P4YK27; A0A0P5IAS3; A0A0P5GUJ5; A0A0P5I5B7; A0A0P5LYR5; A0A0P5PJQ0; A0A0P5XGU4; A0A0P6FTA8; A0A0P5ECS0; A0A0N8AKQ7; A0A0P5KLT7; A0A0P5UT23; A0A0P5NG35; E9GVW7; A0A0P6EEN9; A0A0P5NEQ8; A0A0N8DYK4	1	1750	2.73	High	0	0.0001698
	FALSE	High	IEIFPAQQK		0.0373061	0	10	136	1	E9HZI6; A0A0P5BM18; A0A0P5M269; A0A0P5PPT4; A0A0P5XGU4; A0A0P5ECS0; A0A0N8AKQ7; A0A0P5UT23; A0A0P5YRE9; A0A0P5NEQ8	0	1073.6	2.15	High	0	0.02544
	FALSE	High	FQQNIYSSQTFR		0.0025825	0	9	122	1	A0A0P5BM18; A0A0P5M269; A0A0P5PPT4; A0A0P5XGU4; A0A0P5ECS0; A0A0N8AKQ7; A0A0P5UT23; A0A0P5YRE9; A0A0P5NEQ8	0	1518.73	3.85	High	0	0.001255
	FALSE	High	VNVNGMEISVTSESYTVK		3.20966e-06	0	8	124	1	A0A0P5BM18; A0A0P5M269; A0A0P5PPT4; A0A0P5XGU4; A0A0P5ECS0; A0A0N8AKQ7; A0A0P5YRE9; A0A0P5NEQ8	0	1956.96	3.79	High	0	6.725e-07
	FALSE	High	VNVNGMEISVTSESYTVK	1xDeamidated [N4]	4.57853e-07	0	8	124	1	A0A0P5BM18; A0A0P5M269; A0A0P5PPT4; A0A0P5XGU4; A0A0P5ECS0; A0A0N8AKQ7; A0A0P5YRE9; A0A0P5NEQ8	0	1957.94	3.67	High	0	7.503e-08
	FALSE	High	VNVNGMEISVTSESYTVK	1xOxidation [M6]	3.01596e-05	0	8	124	2	A0A0P5BM18; A0A0P5M269; A0A0P5PPT4; A0A0P5XGU4; A0A0P5ECS0; A0A0N8AKQ7; A0A0P5YRE9; A0A0P5NEQ8	0	1972.95	4.3	High	0	8.375e-06
	FALSE	High	VNVNGMEISVTSESYTVK	1xDeamidated [N4]; 1xOxidation [M6]	4.66922e-06	0	8	124	1	A0A0P5BM18; A0A0P5M269; A0A0P5PPT4; A0A0P5XGU4; A0A0P5ECS0; A0A0N8AKQ7; A0A0P5YRE9; A0A0P5NEQ8	0	1973.94	2.51	High	0	1.027e-06
	FALSE	High	NVNSPMIMEVEPEILKK	1xOxidation [M6]	5.21259e-05	0	11	99	2	E9HZI6; A0A0P5BM18; A0A0P5F867; A0A0P4YK27; A0A0P5PJQ0; A0A0P5ECS0; A0A0N8AKQ7; A0A0P5UT23; E9GVW7; A0A0P6EEN9; A0A0P5NEQ8	1	1987.02	4.21	High	0	1.553e-05
	FALSE	High	NAENEVLAVIKK		0.00104535	0	9	122	1	E9HZI6; A0A0P5BM18; A0A0P5M269; A0A0P5PPT4; A0A0P5XGU4; A0A0P5ECS0; A0A0N8AKQ7; A0A0P5YRE9; A0A0P5NEQ8	1	1327.76	3.67	High	0	0.0004518
	FALSE	High	NAENEVLAVIKK	1xDeamidated [N]	0.000899057	0	9	122	3	E9HZI6; A0A0P5BM18; A0A0P5M269; A0A0P5PPT4; A0A0P5XGU4; A0A0P5ECS0; A0A0N8AKQ7; A0A0P5YRE9; A0A0P5NEQ8	1	1328.74	3.66	High	0	0.0003829
	FALSE	High	IQTTWETLGDK		0.00864996	0	15	156	2	A0A0P5Z193; A0A0P5BM18; A0A0P4YK27; A0A0P5GUJ5; A0A0P5I5B7; A0A0P5PPT4; A0A0P5PJQ0; A0A0P5XGU4; A0A0P6FTA8; A0A0P5ECS0; A0A0N8AKQ7; A0A0P5KLT7; A0A0P5NG35; A0A0P5NEQ8; A0A0N8DYK4	0	1291.65	2.58	High	0	0.004898
	FALSE	High	NVNSPMIMEVEPEILKK		2.95169e-05	0	11	99	1	E9HZI6; A0A0P5BM18; A0A0P5F867; A0A0P4YK27; A0A0P5PJQ0; A0A0P5ECS0; A0A0N8AKQ7; A0A0P5UT23; E9GVW7; A0A0P6EEN9; A0A0P5NEQ8	1	1971.03	3.71	High	0	8.154e-06
	FALSE	High	NVNSPMIMEVEPEILKK	2xOxidation [M6; M8]	0.000562166	0	11	99	2	E9HZI6; A0A0P5BM18; A0A0P5F867; A0A0P4YK27; A0A0P5PJQ0; A0A0P5ECS0; A0A0N8AKQ7; A0A0P5UT23; E9GVW7; A0A0P6EEN9; A0A0P5NEQ8	1	2003.02	4.46	High	0	0.0002463
	FALSE	High	ITVATTWTR		0.0397517	0	9	144	2	A0A0P5Z193; A0A0P5BM18; A0A0P5PPT4; A0A0P5XGU4; A0A0P5ECS0; A0A0N8AKQ7; A0A0P5KLT7; A0A0P5YRE9; A0A0P5NEQ8	0	1048.58	2.72	High	0	0.02732
	FALSE	High	EKSETVFGISDVSPLLPK		4.4254e-05	0	11	125	2	A0A0P5BM18; A0A0P5M269; A0A0P5PPT4; A0A0P5XGU4; A0A0P5ECS0; A0A0N8AKQ7; A0A0P5UT23; A0A0P5YRE9; E9GVW7; A0A0P5NEQ8; A0A0P5L1A1	1	1946.05	3.16	High	0	0.00153
	FALSE	High	KISNFTPAILLSETK	1xDeamidated [N4]	8.22611e-07	0	1	2	2	A0A0P5NEQ8	1	1662.93	4.65	High	0	1.453e-07
	FALSE	High	AIFALSTLAVQK		0.003613	0	12	127	2	A0A0P5Z193; A0A0P5BM18; A0A0P6FZL4; A0A0P4YK27; A0A0P5GUJ5; A0A0P5LYR5; A0A0P5XGU4; A0A0P6FTA8; A0A0P5ECS0; A0A0N8AKQ7; A0A0P5NEQ8; A0A0N8DYK4	0	1261.75	3.19	High	0	0.001831
	FALSE	High	AIFALSTLAVQK	1xDeamidated [Q11]	0.00546083	0	12	127	1	A0A0P5Z193; A0A0P5BM18; A0A0P6FZL4; A0A0P4YK27; A0A0P5GUJ5; A0A0P5LYR5; A0A0P5XGU4; A0A0P6FTA8; A0A0P5ECS0; A0A0N8AKQ7; A0A0P5NEQ8; A0A0N8DYK4	0	1262.74	2.41	High	0	0.002913
	FALSE	High	NVNSPMIMEVEPEILK	1xOxidation [M]	0.00325839	0	11	99	2	E9HZI6; A0A0P5BM18; A0A0P5F867; A0A0P4YK27; A0A0P5PJQ0; A0A0P5ECS0; A0A0N8AKQ7; A0A0P5UT23; E9GVW7; A0A0P6EEN9; A0A0P5NEQ8	0	1858.93	3.37	High	0	0.00163
	FALSE	High	NVNSPMIMEVEPEILK	2xOxidation [M6; M8]	2.51675e-05	0	11	99	1	E9HZI6; A0A0P5BM18; A0A0P5F867; A0A0P4YK27; A0A0P5PJQ0; A0A0P5ECS0; A0A0N8AKQ7; A0A0P5UT23; E9GVW7; A0A0P6EEN9; A0A0P5NEQ8	0	1874.92	3.33	High	0	6.82e-06
	FALSE	High	NAENEVLAVIK	1xDeamidated [N]	0.00203792	0	9	122	2	E9HZI6; A0A0P5BM18; A0A0P5M269; A0A0P5PPT4; A0A0P5XGU4; A0A0P5ECS0; A0A0N8AKQ7; A0A0P5YRE9; A0A0P5NEQ8	0	1200.65	3.27	High	0	0.0009605
	FALSE	High	AKAIFALSTLAVQK		0.0317518	0	12	127	1	A0A0P5Z193; A0A0P5BM18; A0A0P6FZL4; A0A0P4YK27; A0A0P5GUJ5; A0A0P5LYR5; A0A0P5XGU4; A0A0P6FTA8; A0A0P5ECS0; A0A0N8AKQ7; A0A0P5NEQ8; A0A0N8DYK4	1	1460.88	2.09	High	0	0.02115
	FALSE	High	AIFALSTLAVQKK		9.08705e-05	0	12	127	1	A0A0P5Z193; A0A0P5BM18; A0A0P6FZL4; A0A0P4YK27; A0A0P5GUJ5; A0A0P5LYR5; A0A0P5XGU4; A0A0P6FTA8; A0A0P5ECS0; A0A0N8AKQ7; A0A0P5NEQ8; A0A0N8DYK4	1	1389.85	3.44	High	0	2.892e-05
	FALSE	High	AIFALSTLAVQKK	1xDeamidated [Q11]	0.000401727	0	12	127	2	A0A0P5Z193; A0A0P5BM18; A0A0P6FZL4; A0A0P4YK27; A0A0P5GUJ5; A0A0P5LYR5; A0A0P5XGU4; A0A0P6FTA8; A0A0P5ECS0; A0A0N8AKQ7; A0A0P5NEQ8; A0A0N8DYK4	1	1390.83	3.67	High	0	0.0001541
	FALSE	High	DLMDVAYELR		0.0185546	0	9	127	1	A0A0P5BM18; A0A0P5M269; A0A0P5PPT4; A0A0P5XGU4; A0A0P5ECS0; A0A0N8AKQ7; A0A0P5UT23; A0A0P5YRE9; A0A0P5NEQ8	0	1224.59	2.47	High	0	0.01156
	FALSE	High	DLMDVAYELR	1xOxidation [M3]	0.0161111	0	9	127	1	A0A0P5BM18; A0A0P5M269; A0A0P5PPT4; A0A0P5XGU4; A0A0P5ECS0; A0A0N8AKQ7; A0A0P5UT23; A0A0P5YRE9; A0A0P5NEQ8	0	1240.59	3.03	High	0	0.009868
	FALSE	High	LCGLCGSQNGDK	2xCarbamidomethyl [C2; C5]	0.0014502	0	8	121	1	A0A0P5BM18; A0A0P5M269; A0A0P5PPT4; A0A0P5XGU4; A0A0P5ECS0; A0A0N8AKQ7; A0A0P5UT23; A0A0P5NEQ8	0	1308.57	2.4	High	0	0.0006534
	FALSE	High	LCGLCGSQNGDK	2xCarbamidomethyl [C2; C5]; 1xDeamidated [N9]	0.00150104	0	8	121	2	A0A0P5BM18; A0A0P5M269; A0A0P5PPT4; A0A0P5XGU4; A0A0P5ECS0; A0A0N8AKQ7; A0A0P5UT23; A0A0P5NEQ8	0	1309.55	2.68	High	0	0.0006812
	FALSE	High	IHEELKIEAR		0.00358203	0	19	168	2	E9HZI6; A0A0P5BM18; A0A0P5S327; A0A0P4YK27; A0A0P5GUJ5; A0A0P5I5B7; A0A0P5PPT4; A0A0P5PJQ0; A0A0P5XGU4; A0A0P6FTA8; A0A0P5ECS0; A0A0N8AKQ7; A0A0P5KLT7; A0A0P5UT23; A0A0P5NG35; E9GVW7; A0A0P6EEN9; A0A0P5NEQ8; A0A0N8DYK4	1	1237.69	3.92	High	0	0.00455
	FALSE	High	HSVVPFTTVRK		0.0297906	0	13	119	1	A0A0P5Z193; A0A0P5I0U9; A0A0P5BM18; A0A0P5GUJ5; A0A0P5PPT4; A0A0P5PJQ0; A0A0P5XGU4; A0A0P5ECS0; A0A0N8AKQ7; A0A0P5UT23; A0A0P5NEQ8; A0A0N8BQS0; A0A0N8DYK4	1	1270.73	3.18	High	0	0.01973
	FALSE	High	RPSQWTVYR		0.0129487	0	9	121	1	E9HZI6; A0A0P5BM18; A0A0P5M269; A0A0P5XGU4; A0A0P5ECS0; A0A0N8AKQ7; A0A0P5UT23; A0A0P5YRE9; A0A0P5NEQ8	0	1192.62	2.63	High	0	0.007689
	FALSE	High	KYEQEQEDVVLSR		2.55441e-06	0	9	54	2	A0A0P5S327; A0A0P6FZL4; A0A0P5IAS3; A0A0P5GUJ5; A0A0P5LYR5; A0A0P5PJQ0; A0A0N8AKQ7; A0A0P6EEN9; A0A0P5NEQ8	1	1622.8	4.14	High	0	5.193e-07
	FALSE	High	CFSTESVPK	1xCarbamidomethyl [C1]	0.0514139	0	12	119	2	E9HZI6; A0A0P5BM18; A0A0P5M269; A0A0P5PPT4; A0A0P5XGU4; A0A0P5ECS0; A0A0N8AKQ7; A0A0P5UT23; A0A0P5YRE9; E9GVW7; A0A0P5NEQ8; A0A0P5L1A1	0	1054.49	2.58	High	0	0.03656
	FALSE	High	SETVFGISDVSPLLPK		0.000457151	0	11	125	1	A0A0P5BM18; A0A0P5M269; A0A0P5PPT4; A0A0P5XGU4; A0A0P5ECS0; A0A0N8AKQ7; A0A0P5UT23; A0A0P5YRE9; E9GVW7; A0A0P5NEQ8; A0A0P5L1A1	0	1688.91	3.32	High	0	0.0001781
	FALSE	High	IAGEQAVQAISALVPTVETPTK		6.45024e-06	0	8	94	1	A0A0P5BM18; A0A0P4YK27; A0A0P5PJQ0; A0A0P6FTA8; A0A0P5ECS0; A0A0P5UT23; A0A0P5NEQ8; A0A0N8DYK4	0	2223.22	4.13	High	0	1.477e-06
	FALSE	High	RIGSSIVYGMDGK	1xOxidation [M10]	0.00503227	0	13	138	2	A0A0P5Z193; A0A0P5BM18; A0A0P4YK27; A0A0P5GUJ5; A0A0P5PPT4; A0A0P5PJQ0; A0A0P5XGU4; A0A0P5ECS0; A0A0N8AKQ7; A0A0P5KLT7; A0A0P5UT23; A0A0P5YRE9; A0A0P5NEQ8	1	1398.7	2.71	High	0.00329	0.126
	FALSE	High	ELIKDETERR		0.0169603	0	6	64	1	A0A0P5GUJ5; A0A0P5PPT4; A0A0P5PJQ0; A0A0N8AKQ7; A0A0P5KLT7; A0A0P5NEQ8	2	1288.69	3.07	High	0	0.01046
	FALSE	High	DWFGTLAFAAMPSTIR	1xOxidation [M11]	0.000513541	0	10	114	2	A0A0P5Z193; A0A0P5BM18; A0A0P5GUJ5; A0A0P5PPT4; A0A0P5XGU4; A0A0P6FTA8; A0A0P5ECS0; A0A0N8AKQ7; A0A0P5UT23; A0A0P5NEQ8	0	1799.88	3.09	High	0	0.0002032
	FALSE	High	ELLTSLMEFLK	1xOxidation [M7]	0.0208242	0	13	108	1	A0A0P5Z193; A0A0P5BM18; A0A0P4YK27; A0A0P5F3B7; A0A0P5RAR4; A0A0P5PJQ0; A0A0P6FTA8; A0A0P5ECS0; A0A0N8AKQ7; A0A0P5UT23; A0A0P6EEN9; A0A0P5NEQ8; A0A0N8DYK4	0	1339.72	2.72	High	0	0.01313
	FALSE	High	ELLTSLMEFLK		0.0618253	0	13	108	1	A0A0P5Z193; A0A0P5BM18; A0A0P4YK27; A0A0P5F3B7; A0A0P5RAR4; A0A0P5PJQ0; A0A0P6FTA8; A0A0P5ECS0; A0A0N8AKQ7; A0A0P5UT23; A0A0P6EEN9; A0A0P5NEQ8; A0A0N8DYK4	0	1323.72	1.64	High	0	0.04502
	FALSE	High	EIVGTLLMPIFFNK	1xOxidation [M8]	0.000105206	0	22	169	3	A0A0P5Z193; E9HZI6; A0A0P5BM18; A0A0P5S327; A0A0P6FZL4; A0A0P4YK27; A0A0P5IAS3; A0A0P5GUJ5; A0A0P5I5B7; A0A0P5LYR5; A0A0P5PJQ0; A0A0P5XGU4; A0A0P6FTA8; A0A0P5ECS0; A0A0N8AKQ7; A0A0P5KLT7; A0A0P5UT23; A0A0P5NG35; E9GVW7; A0A0P6EEN9; A0A0P5NEQ8; A0A0N8DYK4	0	1637.9	3.87	High	0	3.42e-05
	FALSE	High	EIVGTLLMPIFFNK		0.00626649	0	22	169	2	A0A0P5Z193; E9HZI6; A0A0P5BM18; A0A0P5S327; A0A0P6FZL4; A0A0P4YK27; A0A0P5IAS3; A0A0P5GUJ5; A0A0P5I5B7; A0A0P5LYR5; A0A0P5PJQ0; A0A0P5XGU4; A0A0P6FTA8; A0A0P5ECS0; A0A0N8AKQ7; A0A0P5KLT7; A0A0P5UT23; A0A0P5NG35; E9GVW7; A0A0P6EEN9; A0A0P5NEQ8; A0A0N8DYK4	0	1621.9	1.87	High	0	0.003393
	FALSE	High	LAALTLLFVSNPPQAFWSR		0.0037557	0	19	158	1	A0A0P5Z193; E9HZI6; A0A0P5BM18; A0A0P5S327; A0A0P6FZL4; A0A0P4YK27; A0A0P5GUJ5; A0A0P5I5B7; A0A0P5PJQ0; A0A0P5XGU4; A0A0P6FTA8; A0A0P5ECS0; A0A0N8AKQ7; A0A0P5KLT7; A0A0P5UT23; A0A0P5NG35; E9GVW7; A0A0P6EEN9; A0A0P5NEQ8	0	2131.17	2.48	High	0	0.001914
	FALSE	High	ATGQPELYIYLNFLDNYQR		7.26318e-05	0	21	168	1	A0A0P5Z193; E9HZI6; A0A0P5XPE2; A0A0P5BM18; A0A0P5S327; A0A0P4YK27; A0A0P5IAS3; A0A0P5GUJ5; A0A0P5I5B7; A0A0P5PPT4; A0A0P5PJQ0; A0A0P5XGU4; A0A0P5ECS0; A0A0N8AKQ7; A0A0P5KLT7; A0A0P5UT23; A0A0P5NG35; E9GVW7; A0A0P6EEN9; A0A0P5NEQ8; A0A0N8DYK4	0	2318.15	2.83	High	0	2.246e-05
	FALSE	High	LQEECLKEK	1xCarbamidomethyl [C5]	0.0554498	0	12	131	4	E9HZI6; A0A0P5BM18; A0A0P5M269; A0A0P5PPT4; A0A0P5XGU4; A0A0P5ECS0; A0A0N8AKQ7; A0A0P5UT23; A0A0P5YRE9; E9GVW7; A0A0P5NEQ8; A0A0P5L1A1	1	1176.59	2.03	High	0.00329	0.0946
	FALSE	High	KELIKDETER		0.0149799	0	6	65	1	A0A0P5GUJ5; A0A0P5PPT4; A0A0P5PJQ0; A0A0N8AKQ7; A0A0P5KLT7; A0A0P5NEQ8	2	1260.68	2.7	High	0	0.009078
	FALSE	High	LLSEIISDVESEAYYVDPSTK		3.49175e-05	0	6	88	6	A0A0P5Z193; A0A0P5BM18; A0A0P5PJQ0; A0A0P5ECS0; A0A0N8AKQ7; A0A0P5NEQ8	0	2358.16	3.86	High	0	9.862e-06
	FALSE	High	LVMGEFCNPSDSIVASQLVPYLAEQAK	1xCarbamidomethyl [C7]; 1xOxidation [M3]	4.74122e-05	0	13	136	1	E9HZI6; A0A0P5BM18; A0A0P5I5B7; A0A0P5RAR4; A0A0P5PJQ0; A0A0P6FTA8; A0A0P5ECS0; A0A0N8AKQ7; A0A0P5KLT7; A0A0P5UT23; A0A0P5NG35; A0A0P6EEN9; A0A0P5NEQ8	0	2982.46	4.82	High	0	1.393e-05
	FALSE	High	GRLCGLCGSQNGDK	2xCarbamidomethyl [C4; C7]; 1xDeamidated [N11]	0.0394168	0	8	119	1	A0A0P5BM18; A0A0P5M269; A0A0P5PPT4; A0A0P5XGU4; A0A0P5ECS0; A0A0N8AKQ7; A0A0P5UT23; A0A0P5NEQ8	1	1522.67	2.71	High	0	0.027
	FALSE	High	GRLCGLCGSQNGDK	2xCarbamidomethyl [C4; C7]	0.0202972	0	8	119	1	A0A0P5BM18; A0A0P5M269; A0A0P5PPT4; A0A0P5XGU4; A0A0P5ECS0; A0A0N8AKQ7; A0A0P5UT23; A0A0P5NEQ8	1	1521.69	2.46	High	0	0.0128
	FALSE	High	VANKNPLNREETVR		0.00482037	0	18	159	2	A0A0P5BM18; A0A0P5S327; A0A0P6FZL4; A0A0P4YK27; A0A0P5IAS3; A0A0P5GUJ5; A0A0P5I5B7; A0A0P5PJQ0; A0A0P5XGU4; A0A0P6FTA8; A0A0P5ECS0; A0A0N8AKQ7; A0A0P5KLT7; A0A0P5UT23; A0A0P5NG35; A0A0P6EEN9; A0A0P5NEQ8; A0A0N8DYK4	2	1639.89	2.96	High	0	0.002533
	FALSE	High	VANKNPLNREETVR	1xDeamidated [N]	0.0275941	0	18	159	2	A0A0P5BM18; A0A0P5S327; A0A0P6FZL4; A0A0P4YK27; A0A0P5IAS3; A0A0P5GUJ5; A0A0P5I5B7; A0A0P5PJQ0; A0A0P5XGU4; A0A0P6FTA8; A0A0P5ECS0; A0A0N8AKQ7; A0A0P5KLT7; A0A0P5UT23; A0A0P5NG35; A0A0P6EEN9; A0A0P5NEQ8; A0A0N8DYK4	2	1640.87	2.08	High	0	0.01806
	FALSE	High	ELIKDETER		0.0536195	0	6	65	1	A0A0P5GUJ5; A0A0P5PPT4; A0A0P5PJQ0; A0A0N8AKQ7; A0A0P5KLT7; A0A0P5NEQ8	1	1132.58	1.9	High	0	0.03824
	FALSE	High	EKIEIFPAQQK		0.0100529	0	10	136	1	E9HZI6; A0A0P5BM18; A0A0P5M269; A0A0P5PPT4; A0A0P5XGU4; A0A0P5ECS0; A0A0N8AKQ7; A0A0P5UT23; A0A0P5YRE9; A0A0P5NEQ8	1	1330.74	2.7	High	0	0.005796
	FALSE	High	LNEEMSSRPLDELMGK		0.00155366	0	5	54	1	A0A0P5BM18; A0A0P5M269; A0A0P5PPT4; A0A0N8AKQ7; A0A0P5NEQ8	0	1848.88	3.72	High	0	0.0007073
	FALSE	High	LNEEMSSRPLDELMGK	1xOxidation [M14]	0.00839371	0	5	54	2	A0A0P5BM18; A0A0P5M269; A0A0P5PPT4; A0A0N8AKQ7; A0A0P5NEQ8	0	1864.88	3.22	High	0	0.004721
	FALSE	High	LNEEMSSRPLDELMGK	2xOxidation [M5; M14]	0.000103855	0	5	54	2	A0A0P5BM18; A0A0P5M269; A0A0P5PPT4; A0A0N8AKQ7; A0A0P5NEQ8	0	1880.87	4.2	High	0	0.001311
	FALSE	High	HSVVPFTTVR		0.0110959	0	13	120	1	A0A0P5Z193; A0A0P5I0U9; A0A0P5BM18; A0A0P5GUJ5; A0A0P5PPT4; A0A0P5PJQ0; A0A0P5XGU4; A0A0P5ECS0; A0A0N8AKQ7; A0A0P5UT23; A0A0P5NEQ8; A0A0N8BQS0; A0A0N8DYK4	0	1142.63	2.74	High	0	0.006459
	FALSE	High	SNKDESSIISPELEK		3.41579e-07	0	16	145	2	A0A0P5Z193; A0A0P5XPE2; A0A0P5BM18; A0A0P5S327; A0A0P4YK27; A0A0P5IAS3; A0A0P5GUJ5; A0A0P5I5B7; A0A0P5PJQ0; A0A0P5XGU4; A0A0P6FTA8; A0A0P5ECS0; A0A0P5UT23; A0A0P6EEN9; A0A0P5NEQ8; A0A0N8DYK4	1	1675.84	4.32	High	0	5.409e-08
	FALSE	High	KIVTVLLNK		0.0132861	0	9	142	1	A0A0P5BM18; A0A0P5M269; A0A0P5PPT4; A0A0P5XGU4; A0A0P5ECS0; A0A0N8AKQ7; A0A0P5UT23; A0A0P5YRE9; A0A0P5NEQ8	1	1027.69	3.37	High	0	0.007914
	FALSE	High	SLFDTIYGEQIMSQEYVR	1xOxidation [M12]	6.41011e-05	0	10	94	1	A0A0P5I0U9; A0A0P5BM18; A0A0P4YK27; A0A0P5GUJ5; A0A0P5PPT4; A0A0P5PJQ0; A0A0P5ECS0; A0A0N8AKQ7; A0A0P5NEQ8; A0A0N8DYK4	0	2195.03	2.86	High	0	1.952e-05
	FALSE	High	ISNFTPAILLSETK	1xDeamidated [N3]	4.4637e-05	0	1	2	1	A0A0P5NEQ8	0	1534.84	4.06	High	0	1.303e-05
	FALSE	High	AESEDWEDEALCNLVR	1xCarbamidomethyl [C12]	1.02918e-06	0	16	156	1	A0A0P5Z193; A0A0P5BM18; A0A0P4YK27; A0A0P5IAS3; A0A0P5I5B7; A0A0P5LYR5; A0A0P5PJQ0; A0A0P5XGU4; A0A0P6FTA8; A0A0P5ECS0; A0A0N8AKQ7; A0A0P5KLT7; A0A0P5UT23; A0A0P5NG35; A0A0P5NEQ8; A0A0N8DYK4	0	1935.84	4.34	High	0	1.871e-07
	FALSE	High	EVVVLASPIHR		0.0022308	0	7	76	3	E9HZI6; A0A0P5M269; A0A0P5PPT4; A0A0N8AKQ7; A0A0P5YRE9; E9GVW7; A0A0P5NEQ8	0	1219.72	3.72	High	0	0.001065
	FALSE	High	LAVVQPSVYSK		0.00621283	0	14	125	2	A0A0P5Z193; A0A0P5I0U9; A0A0P5BM18; A0A0P4YK27; A0A0P5GUJ5; A0A0P5PPT4; A0A0P5PJQ0; A0A0P5XGU4; A0A0P6FTA8; A0A0P5ECS0; A0A0N8AKQ7; A0A0P5NEQ8; A0A0N8BQS0; A0A0N8DYK4	0	1190.68	3.16	High	0	0.003369
	FALSE	High	IGSSIVYGMDGK	1xOxidation [M9]	0.00385394	0	13	138	1	A0A0P5Z193; A0A0P5BM18; A0A0P4YK27; A0A0P5GUJ5; A0A0P5PPT4; A0A0P5PJQ0; A0A0P5XGU4; A0A0P5ECS0; A0A0N8AKQ7; A0A0P5KLT7; A0A0P5UT23; A0A0P5YRE9; A0A0P5NEQ8	0	1242.6	3.29	High	0	0.001964
	FALSE	High	FKSNKDESSIISPELEK		1.6924e-07	0	16	144	3	A0A0P5Z193; A0A0P5XPE2; A0A0P5BM18; A0A0P5S327; A0A0P4YK27; A0A0P5IAS3; A0A0P5GUJ5; A0A0P5I5B7; A0A0P5PJQ0; A0A0P5XGU4; A0A0P6FTA8; A0A0P5ECS0; A0A0P5UT23; A0A0P6EEN9; A0A0P5NEQ8; A0A0N8DYK4	2	1951	5.15	High	0	2.455e-08
	FALSE	High	AVMTIKYNEMPAVVR	2xOxidation [M3; M10]	0.0313497	0	11	151	1	A0A0P5Z193; A0A0P5BM18; A0A0P5M269; A0A0P5PPT4; A0A0P5XGU4; A0A0P5ECS0; A0A0N8AKQ7; A0A0P5KLT7; A0A0P5UT23; A0A0P5YRE9; A0A0P5NEQ8	1	1753.9	2.67	High	0	0.02089
	FALSE	High	IVTVLLNKEK		0.062344	0	9	139	1	A0A0P5BM18; A0A0P5M269; A0A0P5PPT4; A0A0P5XGU4; A0A0P5ECS0; A0A0N8AKQ7; A0A0P5UT23; A0A0P5YRE9; A0A0P5NEQ8	1	1156.73	2.18	High	0	0.04544
	FALSE	High	FFTINPNTIFR		0.00643025	0	19	164	3	A0A0P5XPE2; A0A0P5BM18; A0A0P5S327; A0A0P4YK27; A0A0P5IAS3; A0A0P5I5B7; A0A0P5PPT4; A0A0P5PJQ0; A0A0P5XGU4; A0A0P6FTA8; A0A0P5ECS0; A0A0N8AKQ7; A0A0P5R4V4; A0A0P5KLT7; A0A0P5UT23; A0A0P5NG35; A0A0P6EEN9; A0A0P5NEQ8; A0A0N8DYK4	0	1369.73	2.68	High	0	0.004597
	FALSE	High	IEGALKPVVVSK		0.000210513	0	13	162	6	A0A0P5XPE2; A0A0P5BM18; A0A0P5I5B7; A0A0P5PPT4; A0A0P5XGU4; A0A0P6FTA8; A0A0P5ECS0; A0A0N8AKQ7; A0A0P5KLT7; A0A0P5NG35; A0A0P5NEQ8; A0A0N8BQS0; A0A0N8DYK4	0	1239.77	3.92	High	0	7.445e-05
	FALSE	High	SEEDISPSLR		0.0253406	0	9	129	1	A0A0P5Z193; A0A0P5BM18; A0A0P5PPT4; A0A0P5XGU4; A0A0P5ECS0; A0A0N8AKQ7; A0A0P5KLT7; A0A0P5YRE9; A0A0P5NEQ8	0	1132.55	2.73	High	0	0.01641
	FALSE	High	YEQEQEDVVLSR		0.00140713	0	9	54	1	A0A0P5S327; A0A0P6FZL4; A0A0P5IAS3; A0A0P5GUJ5; A0A0P5LYR5; A0A0P5PJQ0; A0A0N8AKQ7; A0A0P6EEN9; A0A0P5NEQ8	0	1494.71	2.98	High	0	0.0006324
	FALSE	High	ENAGKWEINFHK		0.0153698	0	14	121	1	A0A0P5Z193; A0A0P5XPE2; A0A0P5BM18; A0A0P5S327; A0A0P5IAS3; A0A0P5GUJ5; A0A0P5PJQ0; A0A0P6FTA8; A0A0P5ECS0; A0A0P5UT23; A0A0P6EEN9; A0A0P5NEQ8; A0A0N8BQS0; A0A0N8DYK4	1	1472.73	3.02	High	0	0.009346
	FALSE	High	LMEISIDSK		0.0556828	0	17	161	1	A0A0P5Z193; A0A0P5XPE2; A0A0P5BM18; A0A0P5S327; A0A0P5GUJ5; A0A0P5I5B7; A0A0P5PPT4; A0A0P5PJQ0; A0A0P5XGU4; A0A0P6FTA8; A0A0P5ECS0; A0A0N8AKQ7; A0A0P5KLT7; A0A0P5UT23; A0A0P5NG35; A0A0P6EEN9; A0A0P5NEQ8	0	1035.54	2.39	High	0	0.03997
	FALSE	High	LMEISIDSK	1xOxidation [M2]	0.0476639	0	17	161	1	A0A0P5Z193; A0A0P5XPE2; A0A0P5BM18; A0A0P5S327; A0A0P5GUJ5; A0A0P5I5B7; A0A0P5PPT4; A0A0P5PJQ0; A0A0P5XGU4; A0A0P6FTA8; A0A0P5ECS0; A0A0N8AKQ7; A0A0P5KLT7; A0A0P5UT23; A0A0P5NG35; A0A0P6EEN9; A0A0P5NEQ8	0	1051.53	2.43	High	0	0.03344
	FALSE	High	YNEMPAVVR		0.0851047	0.000973478	11	152	1	A0A0P5Z193; A0A0P5BM18; A0A0P5M269; A0A0P5PPT4; A0A0P5XGU4; A0A0P5ECS0; A0A0N8AKQ7; A0A0P5KLT7; A0A0P5UT23; A0A0P5YRE9; A0A0P5NEQ8	0	1078.53	2.45	High	0.0007147	0.06469
	FALSE	High	RCFSTESVPK	1xCarbamidomethyl [C2]	0.080995	0.000973478	12	119	1	E9HZI6; A0A0P5BM18; A0A0P5M269; A0A0P5PPT4; A0A0P5XGU4; A0A0P5ECS0; A0A0N8AKQ7; A0A0P5UT23; A0A0P5YRE9; E9GVW7; A0A0P5NEQ8; A0A0P5L1A1	1	1210.59	2.99	High	0.0007147	0.06121
	FALSE	High	ITTALSLSR		0.0858086	0.000973478	17	144	1	A0A0P5Z193; E9HZI6; A0A0P5BM18; A0A0P5F867; A0A0P5S327; A0A0P4YK27; A0A0P5I5B7; A0A0P5LYR5; A0A0P5PJQ0; A0A0P5ECS0; A0A0N8AKQ7; A0A0P5KLT7; A0A0P5NG35; E9GVW7; A0A0P6EEN9; A0A0P5NEQ8; A0A0N8DYK4	0	961.568	2.48	High	0.0007147	0.06514
	FALSE	High	YWPLLDSFAR		0.0783607	0.000973478	11	116	2	A0A0P5Z193; A0A0P5BM18; A0A0P5S327; A0A0P5IAS3; A0A0P5PJQ0; A0A0P6FTA8; A0A0P5ECS0; A0A0P5UT23; A0A0P6EEN9; A0A0P5NEQ8; A0A0N8BQS0	0	1267.65	1.84	High	0.003911	0.1302
	FALSE	High	YNEMPAVVR	1xOxidation [M4]	0.0721274	0.000973478	11	152	1	A0A0P5Z193; A0A0P5BM18; A0A0P5M269; A0A0P5PPT4; A0A0P5XGU4; A0A0P5ECS0; A0A0N8AKQ7; A0A0P5KLT7; A0A0P5UT23; A0A0P5YRE9; A0A0P5NEQ8	0	1094.53	2.47	High	0.0007147	0.05362
	FALSE	High	KITVATTWTR		0.0751824	0.000973478	9	142	2	A0A0P5Z193; A0A0P5BM18; A0A0P5PPT4; A0A0P5XGU4; A0A0P5ECS0; A0A0N8AKQ7; A0A0P5KLT7; A0A0P5YRE9; A0A0P5NEQ8	1	1176.67	3.33	High	0.008045	0.1851
	FALSE	High	QQDSQWESQK		0.115584	0.00283597	17	158	1	A0A0P5I0U9; E9HZI6; A0A0P5BM18; A0A0P5M269; A0A0P4YK27; A0A0P5GUJ5; A0A0P5I5B7; A0A0P5PPT4; A0A0P5PJQ0; A0A0P5XGU4; A0A0P5ECS0; A0A0N8AKQ7; A0A0P5KLT7; A0A0P5UT23; A0A0P5YRE9; E9GVW7; A0A0P5NEQ8	0	1263.56	1.69	High	0.002777	0.09138
	FALSE	High	FAIEGDMK		0.149869	0.00358207	16	149	2	A0A0P5Z193; A0A0P5XPE2; A0A0P5BM18; A0A0P4YK27; A0A0P5GUJ5; A0A0P5I5B7; A0A0P5PPT4; A0A0P6FTA8; A0A0P5ECS0; A0A0N8AKQ7; A0A0P5KLT7; A0A0P5UT23; A0A0P5NG35; A0A0P5NEQ8; A0A0N8BQS0; A0A0N8DYK4	0	910.434	2.01	High	0.00329	0.1224
	FALSE	High	LGFHCLPK	1xCarbamidomethyl [C5]	0.131449	0.00358207	12	122	1	E9HZI6; A0A0P5BM18; A0A0P5M269; A0A0P5PPT4; A0A0P5XGU4; A0A0P5ECS0; A0A0N8AKQ7; A0A0P5UT23; A0A0P5YRE9; E9GVW7; A0A0P5NEQ8; A0A0P5L1A1	0	971.513	2.23	High	0.00329	0.1058
	FALSE	High	IVTVLLNK		0.152253	0.00358207	9	145	2	A0A0P5BM18; A0A0P5M269; A0A0P5PPT4; A0A0P5XGU4; A0A0P5ECS0; A0A0N8AKQ7; A0A0P5UT23; A0A0P5YRE9; A0A0P5NEQ8	0	899.592	2.75	High	0.00329	0.1251
	FALSE	High	EIVGTLLMPIFFNKAEETEVR	1xOxidation [M8]	0.162767	0.00527855	21	163	1	A0A0P5Z193; E9HZI6; A0A0P5BM18; A0A0P6FZL4; A0A0P4YK27; A0A0P5IAS3; A0A0P5GUJ5; A0A0P5I5B7; A0A0P5LYR5; A0A0P5PJQ0; A0A0P5XGU4; A0A0P6FTA8; A0A0P5ECS0; A0A0N8AKQ7; A0A0P5KLT7; A0A0P5UT23; A0A0P5NG35; E9GVW7; A0A0P6EEN9; A0A0P5NEQ8; A0A0N8DYK4	1	2452.28	1.46	High	0.004515	0.1346
	FALSE	High	LVGKPGLR		0.185741	0.00607653	19	162	1	A0A0P5Z193; E9HZI6; A0A0P5BM18; A0A0P5S327; A0A0P5GUJ5; A0A0P5I5B7; A0A0P5PPT4; A0A0P5PJQ0; A0A0P5XGU4; A0A0P6FTA8; A0A0P5ECS0; A0A0N8AKQ7; A0A0P5KLT7; A0A0P5UT23; A0A0P5NG35; E9GVW7; A0A0P6EEN9; A0A0P5NEQ8; A0A0N8DYK4	0	839.546	1.78	High	0.005091	0.1564
FALSE	High	Master Protein	A0A0P5UT23	Copper-zinc cu-zn superoxide dismutase OS=Daphnia magna PE=4 SV=1	0	346.94	38.2949	64	123	3	1	1431	161.9	7.77	367.31	64
	Checked	Confidence	Sequence	Modifications	Qvality PEP	Qvality q-value	# Protein Groups	# Proteins	# PSMs	Master Protein Accessions	# Missed Cleavages	Theo. MH+ [Da]	XCorr Sequest HT	Confidence Sequest HT	Percolator q-Value Sequest HT	Percolator PEP Sequest HT
	FALSE	High	LMVETPFSR		0.0294129	0	10	125	1	A0A0P5Z193; A0A0P5XPE2; A0A0P5BM18; A0A0P4YK27; A0A0P5GUJ5; A0A0P6FTA8; A0A0P5ECS0; A0A0P5UT23; A0A0P5NEQ8; A0A0N8DYK4	0	1079.56	2.44	High	0	0.01941
	FALSE	High	HLGMDFVFVER	1xOxidation [M4]	0.000872352	0	12	112	2	A0A0P5I0U9; A0A0P5BM18; A0A0P4YK27; A0A0P5GUJ5; A0A0P5PPT4; A0A0P5PJQ0; A0A0P5XGU4; A0A0P5ECS0; A0A0N8AKQ7; A0A0P5UT23; A0A0P5NEQ8; A0A0N8DYK4	0	1365.66	3.36	High	0	0.01263
	FALSE	High	HLGMDFVFVER		0.000610115	0	12	112	1	A0A0P5I0U9; A0A0P5BM18; A0A0P4YK27; A0A0P5GUJ5; A0A0P5PPT4; A0A0P5PJQ0; A0A0P5XGU4; A0A0P5ECS0; A0A0N8AKQ7; A0A0P5UT23; A0A0P5NEQ8; A0A0N8DYK4	0	1349.67	2.91	High	0	0.0002464
	FALSE	High	DESSIISPELEK		0.00455817	0	18	150	1	A0A0P5Z193; E9HZI6; A0A0P5XPE2; A0A0P5BM18; A0A0P5S327; A0A0P4YK27; A0A0P5IAS3; A0A0P5GUJ5; A0A0P5I5B7; A0A0P5PJQ0; A0A0P5XGU4; A0A0P6FTA8; A0A0P5ECS0; A0A0P5UT23; E9GVW7; A0A0P6EEN9; A0A0P5NEQ8; A0A0N8DYK4	0	1346.67	3.2	High	0	0.002369
	FALSE	High	TADNFIEVDSPISHMIR	1xOxidation [M15]	4.24698e-06	0	7	118	3	A0A0P5BM18; A0A0P5M269; A0A0P5XGU4; A0A0P5ECS0; A0A0N8AKQ7; A0A0P5UT23; A0A0P5YRE9	0	1960.94	4.91	High	0	9.198e-07
	FALSE	High	KEIVGTLLMPIFFNK	1xOxidation [M9]	1.70782e-05	0	22	169	2	A0A0P5Z193; E9HZI6; A0A0P5BM18; A0A0P5S327; A0A0P6FZL4; A0A0P4YK27; A0A0P5IAS3; A0A0P5GUJ5; A0A0P5I5B7; A0A0P5LYR5; A0A0P5PJQ0; A0A0P5XGU4; A0A0P6FTA8; A0A0P5ECS0; A0A0N8AKQ7; A0A0P5KLT7; A0A0P5UT23; A0A0P5NG35; E9GVW7; A0A0P6EEN9; A0A0P5NEQ8; A0A0N8DYK4	1	1765.99	4.02	High	0	4.421e-06
	FALSE	High	KEIVGTLLMPIFFNK		0.000437875	0	22	169	1	A0A0P5Z193; E9HZI6; A0A0P5BM18; A0A0P5S327; A0A0P6FZL4; A0A0P4YK27; A0A0P5IAS3; A0A0P5GUJ5; A0A0P5I5B7; A0A0P5LYR5; A0A0P5PJQ0; A0A0P5XGU4; A0A0P6FTA8; A0A0P5ECS0; A0A0N8AKQ7; A0A0P5KLT7; A0A0P5UT23; A0A0P5NG35; E9GVW7; A0A0P6EEN9; A0A0P5NEQ8; A0A0N8DYK4	1	1750	2.73	High	0	0.0001698
	FALSE	High	IEIFPAQQK		0.0373061	0	10	136	1	E9HZI6; A0A0P5BM18; A0A0P5M269; A0A0P5PPT4; A0A0P5XGU4; A0A0P5ECS0; A0A0N8AKQ7; A0A0P5UT23; A0A0P5YRE9; A0A0P5NEQ8	0	1073.6	2.15	High	0	0.02544
	FALSE	High	KTADNFIEVDSPISHMIR	1xOxidation [M16]	1.72514e-08	0	7	117	3	A0A0P5BM18; A0A0P5M269; A0A0P5XGU4; A0A0P5ECS0; A0A0N8AKQ7; A0A0P5UT23; A0A0P5YRE9	1	2089.04	5.75	High	0	1.876e-09
	FALSE	High	FQQNIYSSQTFR		0.0025825	0	9	122	1	A0A0P5BM18; A0A0P5M269; A0A0P5PPT4; A0A0P5XGU4; A0A0P5ECS0; A0A0N8AKQ7; A0A0P5UT23; A0A0P5YRE9; A0A0P5NEQ8	0	1518.73	3.85	High	0	0.001255
	FALSE	High	QREWSLYLDNASSETK		2.87507e-07	0	15	150	2	A0A0P5Z193; A0A0P5BM18; A0A0P5M269; A0A0P4YK27; A0A0P5GUJ5; A0A0P5I5B7; A0A0P5PPT4; A0A0P5PJQ0; A0A0P5XGU4; A0A0P6FTA8; A0A0P5ECS0; A0A0N8AKQ7; A0A0P5KLT7; A0A0P5UT23; A0A0P5YRE9	1	1926.92	5.66	High	0	4.445e-08
	FALSE	High	QREWSLYLDNASSETK	1xDeamidated [N10]	0.00402342	0	15	150	1	A0A0P5Z193; A0A0P5BM18; A0A0P5M269; A0A0P4YK27; A0A0P5GUJ5; A0A0P5I5B7; A0A0P5PPT4; A0A0P5PJQ0; A0A0P5XGU4; A0A0P6FTA8; A0A0P5ECS0; A0A0N8AKQ7; A0A0P5KLT7; A0A0P5UT23; A0A0P5YRE9	1	1927.9	3.59	High	0	0.002064
	FALSE	High	NVNSPMIMEVEPEILKK	1xOxidation [M6]	5.21259e-05	0	11	99	2	E9HZI6; A0A0P5BM18; A0A0P5F867; A0A0P4YK27; A0A0P5PJQ0; A0A0P5ECS0; A0A0N8AKQ7; A0A0P5UT23; E9GVW7; A0A0P6EEN9; A0A0P5NEQ8	1	1987.02	4.21	High	0	1.553e-05
	FALSE	High	NVNSPMIMEVEPEILKK		2.95169e-05	0	11	99	1	E9HZI6; A0A0P5BM18; A0A0P5F867; A0A0P4YK27; A0A0P5PJQ0; A0A0P5ECS0; A0A0N8AKQ7; A0A0P5UT23; E9GVW7; A0A0P6EEN9; A0A0P5NEQ8	1	1971.03	3.71	High	0	8.154e-06
	FALSE	High	NVNSPMIMEVEPEILKK	2xOxidation [M6; M8]	0.000562166	0	11	99	2	E9HZI6; A0A0P5BM18; A0A0P5F867; A0A0P4YK27; A0A0P5PJQ0; A0A0P5ECS0; A0A0N8AKQ7; A0A0P5UT23; E9GVW7; A0A0P6EEN9; A0A0P5NEQ8	1	2003.02	4.46	High	0	0.0002463
	FALSE	High	SLFDTVYGEQIMNK	1xOxidation [M12]	0.0161803	0	7	56	1	A0A0P5Z193; A0A0P5M269; A0A0P5I5B7; A0A0P5XGU4; A0A0P5KLT7; A0A0P5UT23; A0A0P5YRE9	0	1660.79	2.18	High	0	0.009907
	FALSE	High	AYPTTGVDMEWAAALPGR		4.3208e-06	0	9	118	1	A0A0P5Z193; A0A0P5XPE2; A0A0P5BM18; A0A0P4YK27; A0A0P5PJQ0; A0A0P6FTA8; A0A0P5ECS0; A0A0P5UT23; A0A0N8DYK4	0	1905.92	4.21	High	0	9.415e-07
	FALSE	High	AYPTTGVDMEWAAALPGR	1xOxidation [M9]	5.4526e-06	0	9	118	3	A0A0P5Z193; A0A0P5XPE2; A0A0P5BM18; A0A0P4YK27; A0A0P5PJQ0; A0A0P6FTA8; A0A0P5ECS0; A0A0P5UT23; A0A0N8DYK4	0	1921.91	3.95	High	0	1.219e-06
	FALSE	High	EKSETVFGISDVSPLLPK		4.4254e-05	0	11	125	2	A0A0P5BM18; A0A0P5M269; A0A0P5PPT4; A0A0P5XGU4; A0A0P5ECS0; A0A0N8AKQ7; A0A0P5UT23; A0A0P5YRE9; E9GVW7; A0A0P5NEQ8; A0A0P5L1A1	1	1946.05	3.16	High	0	0.00153
	FALSE	High	NVNSPMIMEVEPEILK	1xOxidation [M]	0.00325839	0	11	99	2	E9HZI6; A0A0P5BM18; A0A0P5F867; A0A0P4YK27; A0A0P5PJQ0; A0A0P5ECS0; A0A0N8AKQ7; A0A0P5UT23; E9GVW7; A0A0P6EEN9; A0A0P5NEQ8	0	1858.93	3.37	High	0	0.00163
	FALSE	High	NVNSPMIMEVEPEILK	2xOxidation [M6; M8]	2.51675e-05	0	11	99	1	E9HZI6; A0A0P5BM18; A0A0P5F867; A0A0P4YK27; A0A0P5PJQ0; A0A0P5ECS0; A0A0N8AKQ7; A0A0P5UT23; E9GVW7; A0A0P6EEN9; A0A0P5NEQ8	0	1874.92	3.33	High	0	6.82e-06
	FALSE	High	DLMDVAYELR		0.0185546	0	9	127	1	A0A0P5BM18; A0A0P5M269; A0A0P5PPT4; A0A0P5XGU4; A0A0P5ECS0; A0A0N8AKQ7; A0A0P5UT23; A0A0P5YRE9; A0A0P5NEQ8	0	1224.59	2.47	High	0	0.01156
	FALSE	High	EWSLYLDNASSETK		5.73083e-05	0	16	152	1	A0A0P5Z193; A0A0P5BM18; A0A0P5M269; A0A0P4YK27; A0A0P5GUJ5; A0A0P5I5B7; A0A0P5PPT4; A0A0P5PJQ0; A0A0P5XGU4; A0A0P6FTA8; A0A0P5ECS0; A0A0N8AKQ7; A0A0P5KLT7; A0A0P5UT23; A0A0P5YRE9; A0A0N8DYK4	0	1642.76	3.57	High	0	1.721e-05
	FALSE	High	EWSLYLDNASSETK	1xDeamidated [N8]	0.00133051	0	16	152	1	A0A0P5Z193; A0A0P5BM18; A0A0P5M269; A0A0P4YK27; A0A0P5GUJ5; A0A0P5I5B7; A0A0P5PPT4; A0A0P5PJQ0; A0A0P5XGU4; A0A0P6FTA8; A0A0P5ECS0; A0A0N8AKQ7; A0A0P5KLT7; A0A0P5UT23; A0A0P5YRE9; A0A0N8DYK4	0	1643.74	2.49	High	0	0.0005946
	FALSE	High	DLMDVAYELR	1xOxidation [M3]	0.0161111	0	9	127	1	A0A0P5BM18; A0A0P5M269; A0A0P5PPT4; A0A0P5XGU4; A0A0P5ECS0; A0A0N8AKQ7; A0A0P5UT23; A0A0P5YRE9; A0A0P5NEQ8	0	1240.59	3.03	High	0	0.009868
	FALSE	High	LCGLCGSQNGDK	2xCarbamidomethyl [C2; C5]	0.0014502	0	8	121	1	A0A0P5BM18; A0A0P5M269; A0A0P5PPT4; A0A0P5XGU4; A0A0P5ECS0; A0A0N8AKQ7; A0A0P5UT23; A0A0P5NEQ8	0	1308.57	2.4	High	0	0.0006534
	FALSE	High	LCGLCGSQNGDK	2xCarbamidomethyl [C2; C5]; 1xDeamidated [N9]	0.00150104	0	8	121	2	A0A0P5BM18; A0A0P5M269; A0A0P5PPT4; A0A0P5XGU4; A0A0P5ECS0; A0A0N8AKQ7; A0A0P5UT23; A0A0P5NEQ8	0	1309.55	2.68	High	0	0.0006812
	FALSE	High	IHEELKIEAR		0.00358203	0	19	168	2	E9HZI6; A0A0P5BM18; A0A0P5S327; A0A0P4YK27; A0A0P5GUJ5; A0A0P5I5B7; A0A0P5PPT4; A0A0P5PJQ0; A0A0P5XGU4; A0A0P6FTA8; A0A0P5ECS0; A0A0N8AKQ7; A0A0P5KLT7; A0A0P5UT23; A0A0P5NG35; E9GVW7; A0A0P6EEN9; A0A0P5NEQ8; A0A0N8DYK4	1	1237.69	3.92	High	0	0.00455
	FALSE	High	HSVVPFTTVRK		0.0297906	0	13	119	1	A0A0P5Z193; A0A0P5I0U9; A0A0P5BM18; A0A0P5GUJ5; A0A0P5PPT4; A0A0P5PJQ0; A0A0P5XGU4; A0A0P5ECS0; A0A0N8AKQ7; A0A0P5UT23; A0A0P5NEQ8; A0A0N8BQS0; A0A0N8DYK4	1	1270.73	3.18	High	0	0.01973
	FALSE	High	RPSQWTVYR		0.0129487	0	9	121	1	E9HZI6; A0A0P5BM18; A0A0P5M269; A0A0P5XGU4; A0A0P5ECS0; A0A0N8AKQ7; A0A0P5UT23; A0A0P5YRE9; A0A0P5NEQ8	0	1192.62	2.63	High	0	0.007689
	FALSE	High	CFSTESVPK	1xCarbamidomethyl [C1]	0.0514139	0	12	119	2	E9HZI6; A0A0P5BM18; A0A0P5M269; A0A0P5PPT4; A0A0P5XGU4; A0A0P5ECS0; A0A0N8AKQ7; A0A0P5UT23; A0A0P5YRE9; E9GVW7; A0A0P5NEQ8; A0A0P5L1A1	0	1054.49	2.58	High	0	0.03656
	FALSE	High	SETVFGISDVSPLLPK		0.000457151	0	11	125	1	A0A0P5BM18; A0A0P5M269; A0A0P5PPT4; A0A0P5XGU4; A0A0P5ECS0; A0A0N8AKQ7; A0A0P5UT23; A0A0P5YRE9; E9GVW7; A0A0P5NEQ8; A0A0P5L1A1	0	1688.91	3.32	High	0	0.0001781
	FALSE	High	IAGEQAVQAISALVPTVETPTK		6.45024e-06	0	8	94	1	A0A0P5BM18; A0A0P4YK27; A0A0P5PJQ0; A0A0P6FTA8; A0A0P5ECS0; A0A0P5UT23; A0A0P5NEQ8; A0A0N8DYK4	0	2223.22	4.13	High	0	1.477e-06
	FALSE	High	RIGSSIVYGMDGK	1xOxidation [M10]	0.00503227	0	13	138	2	A0A0P5Z193; A0A0P5BM18; A0A0P4YK27; A0A0P5GUJ5; A0A0P5PPT4; A0A0P5PJQ0; A0A0P5XGU4; A0A0P5ECS0; A0A0N8AKQ7; A0A0P5KLT7; A0A0P5UT23; A0A0P5YRE9; A0A0P5NEQ8	1	1398.7	2.71	High	0.00329	0.126
	FALSE	High	DWFGTLAFAAMPSTIR	1xOxidation [M11]	0.000513541	0	10	114	2	A0A0P5Z193; A0A0P5BM18; A0A0P5GUJ5; A0A0P5PPT4; A0A0P5XGU4; A0A0P6FTA8; A0A0P5ECS0; A0A0N8AKQ7; A0A0P5UT23; A0A0P5NEQ8	0	1799.88	3.09	High	0	0.0002032
	FALSE	High	ELIKDETQRR	1xDeamidated [Q8]	0.0169603	0	1	4	1	A0A0P5UT23	2	1288.69	3.07	High	0	0.01046
	FALSE	High	ELLTSLMEFLK	1xOxidation [M7]	0.0208242	0	13	108	1	A0A0P5Z193; A0A0P5BM18; A0A0P4YK27; A0A0P5F3B7; A0A0P5RAR4; A0A0P5PJQ0; A0A0P6FTA8; A0A0P5ECS0; A0A0N8AKQ7; A0A0P5UT23; A0A0P6EEN9; A0A0P5NEQ8; A0A0N8DYK4	0	1339.72	2.72	High	0	0.01313
	FALSE	High	ELLTSLMEFLK		0.0618253	0	13	108	1	A0A0P5Z193; A0A0P5BM18; A0A0P4YK27; A0A0P5F3B7; A0A0P5RAR4; A0A0P5PJQ0; A0A0P6FTA8; A0A0P5ECS0; A0A0N8AKQ7; A0A0P5UT23; A0A0P6EEN9; A0A0P5NEQ8; A0A0N8DYK4	0	1323.72	1.64	High	0	0.04502
	FALSE	High	EIVGTLLMPIFFNK	1xOxidation [M8]	0.000105206	0	22	169	3	A0A0P5Z193; E9HZI6; A0A0P5BM18; A0A0P5S327; A0A0P6FZL4; A0A0P4YK27; A0A0P5IAS3; A0A0P5GUJ5; A0A0P5I5B7; A0A0P5LYR5; A0A0P5PJQ0; A0A0P5XGU4; A0A0P6FTA8; A0A0P5ECS0; A0A0N8AKQ7; A0A0P5KLT7; A0A0P5UT23; A0A0P5NG35; E9GVW7; A0A0P6EEN9; A0A0P5NEQ8; A0A0N8DYK4	0	1637.9	3.87	High	0	3.42e-05
	FALSE	High	EIVGTLLMPIFFNK		0.00626649	0	22	169	2	A0A0P5Z193; E9HZI6; A0A0P5BM18; A0A0P5S327; A0A0P6FZL4; A0A0P4YK27; A0A0P5IAS3; A0A0P5GUJ5; A0A0P5I5B7; A0A0P5LYR5; A0A0P5PJQ0; A0A0P5XGU4; A0A0P6FTA8; A0A0P5ECS0; A0A0N8AKQ7; A0A0P5KLT7; A0A0P5UT23; A0A0P5NG35; E9GVW7; A0A0P6EEN9; A0A0P5NEQ8; A0A0N8DYK4	0	1621.9	1.87	High	0	0.003393
	FALSE	High	LAALTLLFVSNPPQAFWSR		0.0037557	0	19	158	1	A0A0P5Z193; E9HZI6; A0A0P5BM18; A0A0P5S327; A0A0P6FZL4; A0A0P4YK27; A0A0P5GUJ5; A0A0P5I5B7; A0A0P5PJQ0; A0A0P5XGU4; A0A0P6FTA8; A0A0P5ECS0; A0A0N8AKQ7; A0A0P5KLT7; A0A0P5UT23; A0A0P5NG35; E9GVW7; A0A0P6EEN9; A0A0P5NEQ8	0	2131.17	2.48	High	0	0.001914
	FALSE	High	ATGQPELYIYLNFLDNYQR		7.26318e-05	0	21	168	1	A0A0P5Z193; E9HZI6; A0A0P5XPE2; A0A0P5BM18; A0A0P5S327; A0A0P4YK27; A0A0P5IAS3; A0A0P5GUJ5; A0A0P5I5B7; A0A0P5PPT4; A0A0P5PJQ0; A0A0P5XGU4; A0A0P5ECS0; A0A0N8AKQ7; A0A0P5KLT7; A0A0P5UT23; A0A0P5NG35; E9GVW7; A0A0P6EEN9; A0A0P5NEQ8; A0A0N8DYK4	0	2318.15	2.83	High	0	2.246e-05
	FALSE	High	LQEECLKEK	1xCarbamidomethyl [C5]	0.0554498	0	12	131	4	E9HZI6; A0A0P5BM18; A0A0P5M269; A0A0P5PPT4; A0A0P5XGU4; A0A0P5ECS0; A0A0N8AKQ7; A0A0P5UT23; A0A0P5YRE9; E9GVW7; A0A0P5NEQ8; A0A0P5L1A1	1	1176.59	2.03	High	0.00329	0.0946
	FALSE	High	KELIKDETQR	1xDeamidated [Q9]	0.0149799	0	1	4	1	A0A0P5UT23	2	1260.68	2.7	High	0	0.009078
	FALSE	High	LVMGEFCNPSDSIVASQLVPYLAEQAK	1xCarbamidomethyl [C7]; 1xOxidation [M3]	4.74122e-05	0	13	136	1	E9HZI6; A0A0P5BM18; A0A0P5I5B7; A0A0P5RAR4; A0A0P5PJQ0; A0A0P6FTA8; A0A0P5ECS0; A0A0N8AKQ7; A0A0P5KLT7; A0A0P5UT23; A0A0P5NG35; A0A0P6EEN9; A0A0P5NEQ8	0	2982.46	4.82	High	0	1.393e-05
	FALSE	High	GRLCGLCGSQNGDK	2xCarbamidomethyl [C4; C7]; 1xDeamidated [N11]	0.0394168	0	8	119	1	A0A0P5BM18; A0A0P5M269; A0A0P5PPT4; A0A0P5XGU4; A0A0P5ECS0; A0A0N8AKQ7; A0A0P5UT23; A0A0P5NEQ8	1	1522.67	2.71	High	0	0.027
	FALSE	High	GRLCGLCGSQNGDK	2xCarbamidomethyl [C4; C7]	0.0202972	0	8	119	1	A0A0P5BM18; A0A0P5M269; A0A0P5PPT4; A0A0P5XGU4; A0A0P5ECS0; A0A0N8AKQ7; A0A0P5UT23; A0A0P5NEQ8	1	1521.69	2.46	High	0	0.0128
	FALSE	High	LSYVEEPKENK		0.00320277	0	11	108	4	A0A0P5Z193; A0A0P5XPE2; A0A0P5BM18; A0A0P4YK27; A0A0P5I5B7; A0A0P5PJQ0; A0A0P5XGU4; A0A0P5ECS0; A0A0P5KLT7; A0A0P5UT23; A0A0N8DYK4	1	1335.68	2.92	High	0	0.001599
	FALSE	High	ELIKDETQR	1xDeamidated [Q8]	0.0536195	0	1	4	1	A0A0P5UT23	1	1132.58	1.9	High	0	0.03824
	FALSE	High	RLSYVEEPKENK		0.00971345	0	11	108	4	A0A0P5Z193; A0A0P5XPE2; A0A0P5BM18; A0A0P4YK27; A0A0P5I5B7; A0A0P5PJQ0; A0A0P5XGU4; A0A0P5ECS0; A0A0P5KLT7; A0A0P5UT23; A0A0N8DYK4	2	1491.78	3.37	High	0	0.005556
	FALSE	High	VANKNPLNREETVR		0.00482037	0	18	159	2	A0A0P5BM18; A0A0P5S327; A0A0P6FZL4; A0A0P4YK27; A0A0P5IAS3; A0A0P5GUJ5; A0A0P5I5B7; A0A0P5PJQ0; A0A0P5XGU4; A0A0P6FTA8; A0A0P5ECS0; A0A0N8AKQ7; A0A0P5KLT7; A0A0P5UT23; A0A0P5NG35; A0A0P6EEN9; A0A0P5NEQ8; A0A0N8DYK4	2	1639.89	2.96	High	0	0.002533
	FALSE	High	VANKNPLNREETVR	1xDeamidated [N]	0.0275941	0	18	159	2	A0A0P5BM18; A0A0P5S327; A0A0P6FZL4; A0A0P4YK27; A0A0P5IAS3; A0A0P5GUJ5; A0A0P5I5B7; A0A0P5PJQ0; A0A0P5XGU4; A0A0P6FTA8; A0A0P5ECS0; A0A0N8AKQ7; A0A0P5KLT7; A0A0P5UT23; A0A0P5NG35; A0A0P6EEN9; A0A0P5NEQ8; A0A0N8DYK4	2	1640.87	2.08	High	0	0.01806
	FALSE	High	EKIEIFPAQQK		0.0100529	0	10	136	1	E9HZI6; A0A0P5BM18; A0A0P5M269; A0A0P5PPT4; A0A0P5XGU4; A0A0P5ECS0; A0A0N8AKQ7; A0A0P5UT23; A0A0P5YRE9; A0A0P5NEQ8	1	1330.74	2.7	High	0	0.005796
	FALSE	High	HSVVPFTTVR		0.0110959	0	13	120	1	A0A0P5Z193; A0A0P5I0U9; A0A0P5BM18; A0A0P5GUJ5; A0A0P5PPT4; A0A0P5PJQ0; A0A0P5XGU4; A0A0P5ECS0; A0A0N8AKQ7; A0A0P5UT23; A0A0P5NEQ8; A0A0N8BQS0; A0A0N8DYK4	0	1142.63	2.74	High	0	0.006459
	FALSE	High	SNKDESSIISPELEK		3.41579e-07	0	16	145	2	A0A0P5Z193; A0A0P5XPE2; A0A0P5BM18; A0A0P5S327; A0A0P4YK27; A0A0P5IAS3; A0A0P5GUJ5; A0A0P5I5B7; A0A0P5PJQ0; A0A0P5XGU4; A0A0P6FTA8; A0A0P5ECS0; A0A0P5UT23; A0A0P6EEN9; A0A0P5NEQ8; A0A0N8DYK4	1	1675.84	4.32	High	0	5.409e-08
	FALSE	High	KIVTVLLNK		0.0132861	0	9	142	1	A0A0P5BM18; A0A0P5M269; A0A0P5PPT4; A0A0P5XGU4; A0A0P5ECS0; A0A0N8AKQ7; A0A0P5UT23; A0A0P5YRE9; A0A0P5NEQ8	1	1027.69	3.37	High	0	0.007914
	FALSE	High	GRLCGLCGSQNGDKVTDLTGPR	2xCarbamidomethyl [C4; C7]; 1xDeamidated [N/Q]	2.08925e-09	0	7	106	4	A0A0P5BM18; A0A0P5M269; A0A0P5PPT4; A0A0P5XGU4; A0A0P5ECS0; A0A0N8AKQ7; A0A0P5UT23	2	2362.12	6.69	High	0	1.945e-07
	FALSE	High	AESEDWEDEALCNLVR	1xCarbamidomethyl [C12]	1.02918e-06	0	16	156	1	A0A0P5Z193; A0A0P5BM18; A0A0P4YK27; A0A0P5IAS3; A0A0P5I5B7; A0A0P5LYR5; A0A0P5PJQ0; A0A0P5XGU4; A0A0P6FTA8; A0A0P5ECS0; A0A0N8AKQ7; A0A0P5KLT7; A0A0P5UT23; A0A0P5NG35; A0A0P5NEQ8; A0A0N8DYK4	0	1935.84	4.34	High	0	1.871e-07
	FALSE	High	LCGLCGSQNGDKVTDLTGPR	2xCarbamidomethyl [C2; C5]	1.06274e-07	0	7	108	2	A0A0P5BM18; A0A0P5M269; A0A0P5PPT4; A0A0P5XGU4; A0A0P5ECS0; A0A0N8AKQ7; A0A0P5UT23	1	2148.02	4.89	High	0	6.056e-07
	FALSE	High	LCGLCGSQNGDKVTDLTGPR	2xCarbamidomethyl [C2; C5]; 1xDeamidated [N9]	8.15183e-09	0	7	108	4	A0A0P5BM18; A0A0P5M269; A0A0P5PPT4; A0A0P5XGU4; A0A0P5ECS0; A0A0N8AKQ7; A0A0P5UT23	1	2149	6.14	High	0	8.091e-10
	FALSE	High	IGSSIVYGMDGK	1xOxidation [M9]	0.00385394	0	13	138	1	A0A0P5Z193; A0A0P5BM18; A0A0P4YK27; A0A0P5GUJ5; A0A0P5PPT4; A0A0P5PJQ0; A0A0P5XGU4; A0A0P5ECS0; A0A0N8AKQ7; A0A0P5KLT7; A0A0P5UT23; A0A0P5YRE9; A0A0P5NEQ8	0	1242.6	3.29	High	0	0.001964
	FALSE	High	FKSNKDESSIISPELEK		1.6924e-07	0	16	144	3	A0A0P5Z193; A0A0P5XPE2; A0A0P5BM18; A0A0P5S327; A0A0P4YK27; A0A0P5IAS3; A0A0P5GUJ5; A0A0P5I5B7; A0A0P5PJQ0; A0A0P5XGU4; A0A0P6FTA8; A0A0P5ECS0; A0A0P5UT23; A0A0P6EEN9; A0A0P5NEQ8; A0A0N8DYK4	2	1951	5.15	High	0	2.455e-08
	FALSE	High	AVMTIKYNEMPAVVR	2xOxidation [M3; M10]	0.0313497	0	11	151	1	A0A0P5Z193; A0A0P5BM18; A0A0P5M269; A0A0P5PPT4; A0A0P5XGU4; A0A0P5ECS0; A0A0N8AKQ7; A0A0P5KLT7; A0A0P5UT23; A0A0P5YRE9; A0A0P5NEQ8	1	1753.9	2.67	High	0	0.02089
	FALSE	High	ISYVEEPKENKVTFGEK		0.000116666	0	7	67	4	A0A0P5XPE2; A0A0P5BM18; A0A0P4YK27; A0A0P5XGU4; A0A0P5ECS0; A0A0P5UT23; A0A0N8DYK4	2	1997.02	4.03	High	0	4.26e-05
	FALSE	High	LSYVEEPKENKVTFGEK	1xDeamidated [N10]	0.00355133	0	7	67	2	A0A0P5XPE2; A0A0P5BM18; A0A0P4YK27; A0A0P5XGU4; A0A0P5ECS0; A0A0P5UT23; A0A0N8DYK4	2	1998.01	3.06	High	0	0.00179
	FALSE	High	IVTVLLNKEK		0.062344	0	9	139	1	A0A0P5BM18; A0A0P5M269; A0A0P5PPT4; A0A0P5XGU4; A0A0P5ECS0; A0A0N8AKQ7; A0A0P5UT23; A0A0P5YRE9; A0A0P5NEQ8	1	1156.73	2.18	High	0	0.04544
	FALSE	High	FFTINPNTIFR		0.00643025	0	19	164	3	A0A0P5XPE2; A0A0P5BM18; A0A0P5S327; A0A0P4YK27; A0A0P5IAS3; A0A0P5I5B7; A0A0P5PPT4; A0A0P5PJQ0; A0A0P5XGU4; A0A0P6FTA8; A0A0P5ECS0; A0A0N8AKQ7; A0A0P5R4V4; A0A0P5KLT7; A0A0P5UT23; A0A0P5NG35; A0A0P6EEN9; A0A0P5NEQ8; A0A0N8DYK4	0	1369.73	2.68	High	0	0.004597
	FALSE	High	ENAGKWEINFHK		0.0153698	0	14	121	1	A0A0P5Z193; A0A0P5XPE2; A0A0P5BM18; A0A0P5S327; A0A0P5IAS3; A0A0P5GUJ5; A0A0P5PJQ0; A0A0P6FTA8; A0A0P5ECS0; A0A0P5UT23; A0A0P6EEN9; A0A0P5NEQ8; A0A0N8BQS0; A0A0N8DYK4	1	1472.73	3.02	High	0	0.009346
	FALSE	High	LMEISIDSK		0.0556828	0	17	161	1	A0A0P5Z193; A0A0P5XPE2; A0A0P5BM18; A0A0P5S327; A0A0P5GUJ5; A0A0P5I5B7; A0A0P5PPT4; A0A0P5PJQ0; A0A0P5XGU4; A0A0P6FTA8; A0A0P5ECS0; A0A0N8AKQ7; A0A0P5KLT7; A0A0P5UT23; A0A0P5NG35; A0A0P6EEN9; A0A0P5NEQ8	0	1035.54	2.39	High	0	0.03997
	FALSE	High	LMEISIDSK	1xOxidation [M2]	0.0476639	0	17	161	1	A0A0P5Z193; A0A0P5XPE2; A0A0P5BM18; A0A0P5S327; A0A0P5GUJ5; A0A0P5I5B7; A0A0P5PPT4; A0A0P5PJQ0; A0A0P5XGU4; A0A0P6FTA8; A0A0P5ECS0; A0A0N8AKQ7; A0A0P5KLT7; A0A0P5UT23; A0A0P5NG35; A0A0P6EEN9; A0A0P5NEQ8	0	1051.53	2.43	High	0	0.03344
	FALSE	High	YNEMPAVVR		0.0851047	0.000973478	11	152	1	A0A0P5Z193; A0A0P5BM18; A0A0P5M269; A0A0P5PPT4; A0A0P5XGU4; A0A0P5ECS0; A0A0N8AKQ7; A0A0P5KLT7; A0A0P5UT23; A0A0P5YRE9; A0A0P5NEQ8	0	1078.53	2.45	High	0.0007147	0.06469
	FALSE	High	RCFSTESVPK	1xCarbamidomethyl [C2]	0.080995	0.000973478	12	119	1	E9HZI6; A0A0P5BM18; A0A0P5M269; A0A0P5PPT4; A0A0P5XGU4; A0A0P5ECS0; A0A0N8AKQ7; A0A0P5UT23; A0A0P5YRE9; E9GVW7; A0A0P5NEQ8; A0A0P5L1A1	1	1210.59	2.99	High	0.0007147	0.06121
	FALSE	High	YWPLLDSFAR		0.0783607	0.000973478	11	116	2	A0A0P5Z193; A0A0P5BM18; A0A0P5S327; A0A0P5IAS3; A0A0P5PJQ0; A0A0P6FTA8; A0A0P5ECS0; A0A0P5UT23; A0A0P6EEN9; A0A0P5NEQ8; A0A0N8BQS0	0	1267.65	1.84	High	0.003911	0.1302
	FALSE	High	YNEMPAVVR	1xOxidation [M4]	0.0721274	0.000973478	11	152	1	A0A0P5Z193; A0A0P5BM18; A0A0P5M269; A0A0P5PPT4; A0A0P5XGU4; A0A0P5ECS0; A0A0N8AKQ7; A0A0P5KLT7; A0A0P5UT23; A0A0P5YRE9; A0A0P5NEQ8	0	1094.53	2.47	High	0.0007147	0.05362
	FALSE	High	QQDSQWESQK		0.115584	0.00283597	17	158	1	A0A0P5I0U9; E9HZI6; A0A0P5BM18; A0A0P5M269; A0A0P4YK27; A0A0P5GUJ5; A0A0P5I5B7; A0A0P5PPT4; A0A0P5PJQ0; A0A0P5XGU4; A0A0P5ECS0; A0A0N8AKQ7; A0A0P5KLT7; A0A0P5UT23; A0A0P5YRE9; E9GVW7; A0A0P5NEQ8	0	1263.56	1.69	High	0.002777	0.09138
	FALSE	High	FAIEGDMK		0.149869	0.00358207	16	149	2	A0A0P5Z193; A0A0P5XPE2; A0A0P5BM18; A0A0P4YK27; A0A0P5GUJ5; A0A0P5I5B7; A0A0P5PPT4; A0A0P6FTA8; A0A0P5ECS0; A0A0N8AKQ7; A0A0P5KLT7; A0A0P5UT23; A0A0P5NG35; A0A0P5NEQ8; A0A0N8BQS0; A0A0N8DYK4	0	910.434	2.01	High	0.00329	0.1224
	FALSE	High	LGFHCLPK	1xCarbamidomethyl [C5]	0.131449	0.00358207	12	122	1	E9HZI6; A0A0P5BM18; A0A0P5M269; A0A0P5PPT4; A0A0P5XGU4; A0A0P5ECS0; A0A0N8AKQ7; A0A0P5UT23; A0A0P5YRE9; E9GVW7; A0A0P5NEQ8; A0A0P5L1A1	0	971.513	2.23	High	0.00329	0.1058
	FALSE	High	IVTVLLNK		0.152253	0.00358207	9	145	2	A0A0P5BM18; A0A0P5M269; A0A0P5PPT4; A0A0P5XGU4; A0A0P5ECS0; A0A0N8AKQ7; A0A0P5UT23; A0A0P5YRE9; A0A0P5NEQ8	0	899.592	2.75	High	0.00329	0.1251
	FALSE	High	EIVGTLLMPIFFNKAEETEVR	1xOxidation [M8]	0.162767	0.00527855	21	163	1	A0A0P5Z193; E9HZI6; A0A0P5BM18; A0A0P6FZL4; A0A0P4YK27; A0A0P5IAS3; A0A0P5GUJ5; A0A0P5I5B7; A0A0P5LYR5; A0A0P5PJQ0; A0A0P5XGU4; A0A0P6FTA8; A0A0P5ECS0; A0A0N8AKQ7; A0A0P5KLT7; A0A0P5UT23; A0A0P5NG35; E9GVW7; A0A0P6EEN9; A0A0P5NEQ8; A0A0N8DYK4	1	2452.28	1.46	High	0.004515	0.1346
	FALSE	High	LSYVEEPK		0.184315	0.00607653	11	108	2	A0A0P5Z193; A0A0P5XPE2; A0A0P5BM18; A0A0P4YK27; A0A0P5I5B7; A0A0P5PJQ0; A0A0P5XGU4; A0A0P5ECS0; A0A0P5KLT7; A0A0P5UT23; A0A0N8DYK4	0	964.499	1.97	High	0.005091	0.1552
	FALSE	High	LVGKPGLR		0.185741	0.00607653	19	162	1	A0A0P5Z193; E9HZI6; A0A0P5BM18; A0A0P5S327; A0A0P5GUJ5; A0A0P5I5B7; A0A0P5PPT4; A0A0P5PJQ0; A0A0P5XGU4; A0A0P6FTA8; A0A0P5ECS0; A0A0N8AKQ7; A0A0P5KLT7; A0A0P5UT23; A0A0P5NG35; E9GVW7; A0A0P6EEN9; A0A0P5NEQ8; A0A0N8DYK4	0	839.546	1.78	High	0.005091	0.1564
	FALSE	High	VTDLTGPR		0.19825	0.00767163	10	120	1	E9HZI6; A0A0P5BM18; A0A0P5M269; A0A0P5PPT4; A0A0P5XGU4; A0A0P5ECS0; A0A0N8AKQ7; A0A0P5UT23; A0A0P5YRE9; E9GVW7	0	858.468	2.15	High	0.006261	0.1686
FALSE	High	Master Protein	A0A0P5PPT4	Putative Copper-zinc cu-zn superoxide dismutase OS=Daphnia magna PE=4 SV=1	0	323.455	49.9509	63	120	2	1	1019	114.9	8.57	369.36	63
	Checked	Confidence	Sequence	Modifications	Qvality PEP	Qvality q-value	# Protein Groups	# Proteins	# PSMs	Master Protein Accessions	# Missed Cleavages	Theo. MH+ [Da]	XCorr Sequest HT	Confidence Sequest HT	Percolator q-Value Sequest HT	Percolator PEP Sequest HT
	FALSE	High	VLTDAKEVVVLASPIHR		2.30348e-06	0	5	70	2	E9HZI6; A0A0P5M269; A0A0P5PPT4; A0A0N8AKQ7; A0A0P5YRE9	1	1847.07	6.26	High	0	4.637e-07
	FALSE	High	HLGMDFVFVER	1xOxidation [M4]	0.000872352	0	12	112	2	A0A0P5I0U9; A0A0P5BM18; A0A0P4YK27; A0A0P5GUJ5; A0A0P5PPT4; A0A0P5PJQ0; A0A0P5XGU4; A0A0P5ECS0; A0A0N8AKQ7; A0A0P5UT23; A0A0P5NEQ8; A0A0N8DYK4	0	1365.66	3.36	High	0	0.01263
	FALSE	High	HLGMDFVFVER		0.000610115	0	12	112	1	A0A0P5I0U9; A0A0P5BM18; A0A0P4YK27; A0A0P5GUJ5; A0A0P5PPT4; A0A0P5PJQ0; A0A0P5XGU4; A0A0P5ECS0; A0A0N8AKQ7; A0A0P5UT23; A0A0P5NEQ8; A0A0N8DYK4	0	1349.67	2.91	High	0	0.0002464
	FALSE	High	VFKPYSNVFFR		0.0644609	0	7	111	1	A0A0P5BM18; A0A0P5PPT4; A0A0P5XGU4; A0A0P5ECS0; A0A0N8AKQ7; A0A0P5YRE9; A0A0P5NEQ8	0	1403.75	2.98	High	0	0.04722
	FALSE	High	TADNFIEVNSPISHMIR	1xDeamidated [N9]; 1xOxidation [M15]	4.24698e-06	0	1	1	3	A0A0P5PPT4	0	1960.94	4.91	High	0	9.199e-07
	FALSE	High	IQTTWETLGDKLR		0.00029714	0	15	156	4	A0A0P5Z193; A0A0P5BM18; A0A0P4YK27; A0A0P5GUJ5; A0A0P5I5B7; A0A0P5PPT4; A0A0P5PJQ0; A0A0P5XGU4; A0A0P6FTA8; A0A0P5ECS0; A0A0N8AKQ7; A0A0P5KLT7; A0A0P5NG35; A0A0P5NEQ8; A0A0N8DYK4	1	1560.84	3.5	High	0	0.0001097
	FALSE	High	IEIFPAQQK		0.0373061	0	10	136	1	E9HZI6; A0A0P5BM18; A0A0P5M269; A0A0P5PPT4; A0A0P5XGU4; A0A0P5ECS0; A0A0N8AKQ7; A0A0P5UT23; A0A0P5YRE9; A0A0P5NEQ8	0	1073.6	2.15	High	0	0.02544
	FALSE	High	KTADNFIEVNSPISHMIR	1xDeamidated [N10]; 1xOxidation [M16]	1.72514e-08	0	1	1	3	A0A0P5PPT4	1	2089.04	5.75	High	0	1.876e-09
	FALSE	High	FQQNIYSSQTFR		0.0025825	0	9	122	1	A0A0P5BM18; A0A0P5M269; A0A0P5PPT4; A0A0P5XGU4; A0A0P5ECS0; A0A0N8AKQ7; A0A0P5UT23; A0A0P5YRE9; A0A0P5NEQ8	0	1518.73	3.85	High	0	0.001255
	FALSE	High	QREWSLYLDNASSETK		2.87507e-07	0	15	150	2	A0A0P5Z193; A0A0P5BM18; A0A0P5M269; A0A0P4YK27; A0A0P5GUJ5; A0A0P5I5B7; A0A0P5PPT4; A0A0P5PJQ0; A0A0P5XGU4; A0A0P6FTA8; A0A0P5ECS0; A0A0N8AKQ7; A0A0P5KLT7; A0A0P5UT23; A0A0P5YRE9	1	1926.92	5.66	High	0	4.445e-08
	FALSE	High	QREWSLYLDNASSETK	1xDeamidated [N10]	0.00402342	0	15	150	1	A0A0P5Z193; A0A0P5BM18; A0A0P5M269; A0A0P4YK27; A0A0P5GUJ5; A0A0P5I5B7; A0A0P5PPT4; A0A0P5PJQ0; A0A0P5XGU4; A0A0P6FTA8; A0A0P5ECS0; A0A0N8AKQ7; A0A0P5KLT7; A0A0P5UT23; A0A0P5YRE9	1	1927.9	3.59	High	0	0.002064
	FALSE	High	VNVNGMEISVTSESYTVK		3.20966e-06	0	8	124	1	A0A0P5BM18; A0A0P5M269; A0A0P5PPT4; A0A0P5XGU4; A0A0P5ECS0; A0A0N8AKQ7; A0A0P5YRE9; A0A0P5NEQ8	0	1956.96	3.79	High	0	6.725e-07
	FALSE	High	VNVNGMEISVTSESYTVK	1xDeamidated [N4]	4.57853e-07	0	8	124	1	A0A0P5BM18; A0A0P5M269; A0A0P5PPT4; A0A0P5XGU4; A0A0P5ECS0; A0A0N8AKQ7; A0A0P5YRE9; A0A0P5NEQ8	0	1957.94	3.67	High	0	7.503e-08
	FALSE	High	VNVNGMEISVTSESYTVK	1xOxidation [M6]	3.01596e-05	0	8	124	2	A0A0P5BM18; A0A0P5M269; A0A0P5PPT4; A0A0P5XGU4; A0A0P5ECS0; A0A0N8AKQ7; A0A0P5YRE9; A0A0P5NEQ8	0	1972.95	4.3	High	0	8.375e-06
	FALSE	High	VNVNGMEISVTSESYTVK	1xDeamidated [N4]; 1xOxidation [M6]	4.66922e-06	0	8	124	1	A0A0P5BM18; A0A0P5M269; A0A0P5PPT4; A0A0P5XGU4; A0A0P5ECS0; A0A0N8AKQ7; A0A0P5YRE9; A0A0P5NEQ8	0	1973.94	2.51	High	0	1.027e-06
	FALSE	High	NAENEVLAVIKK		0.00104535	0	9	122	1	E9HZI6; A0A0P5BM18; A0A0P5M269; A0A0P5PPT4; A0A0P5XGU4; A0A0P5ECS0; A0A0N8AKQ7; A0A0P5YRE9; A0A0P5NEQ8	1	1327.76	3.67	High	0	0.0004518
	FALSE	High	NAENEVLAVIKK	1xDeamidated [N]	0.000899057	0	9	122	3	E9HZI6; A0A0P5BM18; A0A0P5M269; A0A0P5PPT4; A0A0P5XGU4; A0A0P5ECS0; A0A0N8AKQ7; A0A0P5YRE9; A0A0P5NEQ8	1	1328.74	3.66	High	0	0.0003829
	FALSE	High	IQTTWETLGDK		0.00864996	0	15	156	2	A0A0P5Z193; A0A0P5BM18; A0A0P4YK27; A0A0P5GUJ5; A0A0P5I5B7; A0A0P5PPT4; A0A0P5PJQ0; A0A0P5XGU4; A0A0P6FTA8; A0A0P5ECS0; A0A0N8AKQ7; A0A0P5KLT7; A0A0P5NG35; A0A0P5NEQ8; A0A0N8DYK4	0	1291.65	2.58	High	0	0.004898
	FALSE	High	ITVATTWTR		0.0397517	0	9	144	2	A0A0P5Z193; A0A0P5BM18; A0A0P5PPT4; A0A0P5XGU4; A0A0P5ECS0; A0A0N8AKQ7; A0A0P5KLT7; A0A0P5YRE9; A0A0P5NEQ8	0	1048.58	2.72	High	0	0.02732
	FALSE	High	KISDFTPAILLSETK		8.22611e-07	0	8	109	2	A0A0P5Z193; A0A0P5I0U9; A0A0P5BM18; A0A0P4YK27; A0A0P5PPT4; A0A0P6FTA8; A0A0P5ECS0; A0A0N8AKQ7	1	1662.93	4.65	High	0	1.453e-07
	FALSE	High	EKSETVFGISDVSPLLPK		4.4254e-05	0	11	125	2	A0A0P5BM18; A0A0P5M269; A0A0P5PPT4; A0A0P5XGU4; A0A0P5ECS0; A0A0N8AKQ7; A0A0P5UT23; A0A0P5YRE9; E9GVW7; A0A0P5NEQ8; A0A0P5L1A1	1	1946.05	3.16	High	0	0.00153
	FALSE	High	NAENEVLAVIK	1xDeamidated [N]	0.00203792	0	9	122	2	E9HZI6; A0A0P5BM18; A0A0P5M269; A0A0P5PPT4; A0A0P5XGU4; A0A0P5ECS0; A0A0N8AKQ7; A0A0P5YRE9; A0A0P5NEQ8	0	1200.65	3.27	High	0	0.0009605
	FALSE	High	GIEIHPVAEVILPK		0.000513541	0	6	108	2	A0A0P5BM18; A0A0P5PPT4; A0A0P5XGU4; A0A0P5ECS0; A0A0N8AKQ7; A0A0P5YRE9	0	1514.89	3.18	High	0	0.0004855
	FALSE	High	DLMDVAYELR		0.0185546	0	9	127	1	A0A0P5BM18; A0A0P5M269; A0A0P5PPT4; A0A0P5XGU4; A0A0P5ECS0; A0A0N8AKQ7; A0A0P5UT23; A0A0P5YRE9; A0A0P5NEQ8	0	1224.59	2.47	High	0	0.01156
	FALSE	High	EWSLYLDNASSETK		5.73083e-05	0	16	152	1	A0A0P5Z193; A0A0P5BM18; A0A0P5M269; A0A0P4YK27; A0A0P5GUJ5; A0A0P5I5B7; A0A0P5PPT4; A0A0P5PJQ0; A0A0P5XGU4; A0A0P6FTA8; A0A0P5ECS0; A0A0N8AKQ7; A0A0P5KLT7; A0A0P5UT23; A0A0P5YRE9; A0A0N8DYK4	0	1642.76	3.57	High	0	1.721e-05
	FALSE	High	EWSLYLDNASSETK	1xDeamidated [N8]	0.00133051	0	16	152	1	A0A0P5Z193; A0A0P5BM18; A0A0P5M269; A0A0P4YK27; A0A0P5GUJ5; A0A0P5I5B7; A0A0P5PPT4; A0A0P5PJQ0; A0A0P5XGU4; A0A0P6FTA8; A0A0P5ECS0; A0A0N8AKQ7; A0A0P5KLT7; A0A0P5UT23; A0A0P5YRE9; A0A0N8DYK4	0	1643.74	2.49	High	0	0.0005946
	FALSE	High	DLMDVAYELR	1xOxidation [M3]	0.0161111	0	9	127	1	A0A0P5BM18; A0A0P5M269; A0A0P5PPT4; A0A0P5XGU4; A0A0P5ECS0; A0A0N8AKQ7; A0A0P5UT23; A0A0P5YRE9; A0A0P5NEQ8	0	1240.59	3.03	High	0	0.009868
	FALSE	High	LCGLCGSQNGDK	2xCarbamidomethyl [C2; C5]	0.0014502	0	8	121	1	A0A0P5BM18; A0A0P5M269; A0A0P5PPT4; A0A0P5XGU4; A0A0P5ECS0; A0A0N8AKQ7; A0A0P5UT23; A0A0P5NEQ8	0	1308.57	2.4	High	0	0.0006534
	FALSE	High	LCGLCGSQNGDK	2xCarbamidomethyl [C2; C5]; 1xDeamidated [N9]	0.00150104	0	8	121	2	A0A0P5BM18; A0A0P5M269; A0A0P5PPT4; A0A0P5XGU4; A0A0P5ECS0; A0A0N8AKQ7; A0A0P5UT23; A0A0P5NEQ8	0	1309.55	2.68	High	0	0.0006812
	FALSE	High	IHEELKIEAR		0.00358203	0	19	168	2	E9HZI6; A0A0P5BM18; A0A0P5S327; A0A0P4YK27; A0A0P5GUJ5; A0A0P5I5B7; A0A0P5PPT4; A0A0P5PJQ0; A0A0P5XGU4; A0A0P6FTA8; A0A0P5ECS0; A0A0N8AKQ7; A0A0P5KLT7; A0A0P5UT23; A0A0P5NG35; E9GVW7; A0A0P6EEN9; A0A0P5NEQ8; A0A0N8DYK4	1	1237.69	3.92	High	0	0.00455
	FALSE	High	HSVVPFTTVRK		0.0297906	0	13	119	1	A0A0P5Z193; A0A0P5I0U9; A0A0P5BM18; A0A0P5GUJ5; A0A0P5PPT4; A0A0P5PJQ0; A0A0P5XGU4; A0A0P5ECS0; A0A0N8AKQ7; A0A0P5UT23; A0A0P5NEQ8; A0A0N8BQS0; A0A0N8DYK4	1	1270.73	3.18	High	0	0.01973
	FALSE	High	CFSTESVPK	1xCarbamidomethyl [C1]	0.0514139	0	12	119	2	E9HZI6; A0A0P5BM18; A0A0P5M269; A0A0P5PPT4; A0A0P5XGU4; A0A0P5ECS0; A0A0N8AKQ7; A0A0P5UT23; A0A0P5YRE9; E9GVW7; A0A0P5NEQ8; A0A0P5L1A1	0	1054.49	2.58	High	0	0.03656
	FALSE	High	SETVFGISDVSPLLPK		0.000457151	0	11	125	1	A0A0P5BM18; A0A0P5M269; A0A0P5PPT4; A0A0P5XGU4; A0A0P5ECS0; A0A0N8AKQ7; A0A0P5UT23; A0A0P5YRE9; E9GVW7; A0A0P5NEQ8; A0A0P5L1A1	0	1688.91	3.32	High	0	0.0001781
	FALSE	High	QWAAALPGR		0.0566243	0	6	46	1	A0A0P5I5B7; A0A0P5PPT4; A0A0P5XGU4; A0A0N8AKQ7; A0A0P5KLT7; A0A0P5NG35	0	969.526	2.65	High	0	0.04066
	FALSE	High	RIGSSIVYGMDGK	1xOxidation [M10]	0.00503227	0	13	138	2	A0A0P5Z193; A0A0P5BM18; A0A0P4YK27; A0A0P5GUJ5; A0A0P5PPT4; A0A0P5PJQ0; A0A0P5XGU4; A0A0P5ECS0; A0A0N8AKQ7; A0A0P5KLT7; A0A0P5UT23; A0A0P5YRE9; A0A0P5NEQ8	1	1398.7	2.71	High	0.00329	0.126
	FALSE	High	ELIKDETERR		0.0169603	0	6	64	1	A0A0P5GUJ5; A0A0P5PPT4; A0A0P5PJQ0; A0A0N8AKQ7; A0A0P5KLT7; A0A0P5NEQ8	2	1288.69	3.07	High	0	0.01046
	FALSE	High	DWFGTLAFAAMPSTIR	1xOxidation [M11]	0.000513541	0	10	114	2	A0A0P5Z193; A0A0P5BM18; A0A0P5GUJ5; A0A0P5PPT4; A0A0P5XGU4; A0A0P6FTA8; A0A0P5ECS0; A0A0N8AKQ7; A0A0P5UT23; A0A0P5NEQ8	0	1799.88	3.09	High	0	0.0002032
	FALSE	High	ATGQPELYIYLNFLDNYQR		7.26318e-05	0	21	168	1	A0A0P5Z193; E9HZI6; A0A0P5XPE2; A0A0P5BM18; A0A0P5S327; A0A0P4YK27; A0A0P5IAS3; A0A0P5GUJ5; A0A0P5I5B7; A0A0P5PPT4; A0A0P5PJQ0; A0A0P5XGU4; A0A0P5ECS0; A0A0N8AKQ7; A0A0P5KLT7; A0A0P5UT23; A0A0P5NG35; E9GVW7; A0A0P6EEN9; A0A0P5NEQ8; A0A0N8DYK4	0	2318.15	2.83	High	0	2.246e-05
	FALSE	High	LQEECLKEK	1xCarbamidomethyl [C5]	0.0554498	0	12	131	4	E9HZI6; A0A0P5BM18; A0A0P5M269; A0A0P5PPT4; A0A0P5XGU4; A0A0P5ECS0; A0A0N8AKQ7; A0A0P5UT23; A0A0P5YRE9; E9GVW7; A0A0P5NEQ8; A0A0P5L1A1	1	1176.59	2.03	High	0.00329	0.0946
	FALSE	High	KELIKDETER		0.0149799	0	6	65	1	A0A0P5GUJ5; A0A0P5PPT4; A0A0P5PJQ0; A0A0N8AKQ7; A0A0P5KLT7; A0A0P5NEQ8	2	1260.68	2.7	High	0	0.009078
	FALSE	High	GMSDECVAAR	1xCarbamidomethyl [C6]	0.0568621	0	4	62	1	A0A0P5FBG0; A0A0P5PPT4; A0A0N8AKQ7; A0A0P5KLT7	0	1095.46	2.57	High	0	0.04093
	FALSE	High	GMSDECVAAR	1xCarbamidomethyl [C6]; 1xOxidation [M2]	0.00725275	0	4	62	3	A0A0P5FBG0; A0A0P5PPT4; A0A0N8AKQ7; A0A0P5KLT7	0	1111.45	2.03	High	0	0.01644
	FALSE	High	GRLCGLCGSQNGDK	2xCarbamidomethyl [C4; C7]; 1xDeamidated [N11]	0.0394168	0	8	119	1	A0A0P5BM18; A0A0P5M269; A0A0P5PPT4; A0A0P5XGU4; A0A0P5ECS0; A0A0N8AKQ7; A0A0P5UT23; A0A0P5NEQ8	1	1522.67	2.71	High	0	0.027
	FALSE	High	GRLCGLCGSQNGDK	2xCarbamidomethyl [C4; C7]	0.0202972	0	8	119	1	A0A0P5BM18; A0A0P5M269; A0A0P5PPT4; A0A0P5XGU4; A0A0P5ECS0; A0A0N8AKQ7; A0A0P5UT23; A0A0P5NEQ8	1	1521.69	2.46	High	0	0.0128
	FALSE	High	ELIKDETER		0.0536195	0	6	65	1	A0A0P5GUJ5; A0A0P5PPT4; A0A0P5PJQ0; A0A0N8AKQ7; A0A0P5KLT7; A0A0P5NEQ8	1	1132.58	1.9	High	0	0.03824
	FALSE	High	EKIEIFPAQQK		0.0100529	0	10	136	1	E9HZI6; A0A0P5BM18; A0A0P5M269; A0A0P5PPT4; A0A0P5XGU4; A0A0P5ECS0; A0A0N8AKQ7; A0A0P5UT23; A0A0P5YRE9; A0A0P5NEQ8	1	1330.74	2.7	High	0	0.005796
	FALSE	High	LNEEMSSRPLDELMGK		0.00155366	0	5	54	1	A0A0P5BM18; A0A0P5M269; A0A0P5PPT4; A0A0N8AKQ7; A0A0P5NEQ8	0	1848.88	3.72	High	0	0.0007073
	FALSE	High	LNEEMSSRPLDELMGK	1xOxidation [M14]	0.00839371	0	5	54	2	A0A0P5BM18; A0A0P5M269; A0A0P5PPT4; A0A0N8AKQ7; A0A0P5NEQ8	0	1864.88	3.22	High	0	0.004721
	FALSE	High	LNEEMSSRPLDELMGK	2xOxidation [M5; M14]	0.000103855	0	5	54	2	A0A0P5BM18; A0A0P5M269; A0A0P5PPT4; A0A0N8AKQ7; A0A0P5NEQ8	0	1880.87	4.2	High	0	0.001311
	FALSE	High	HSVVPFTTVR		0.0110959	0	13	120	1	A0A0P5Z193; A0A0P5I0U9; A0A0P5BM18; A0A0P5GUJ5; A0A0P5PPT4; A0A0P5PJQ0; A0A0P5XGU4; A0A0P5ECS0; A0A0N8AKQ7; A0A0P5UT23; A0A0P5NEQ8; A0A0N8BQS0; A0A0N8DYK4	0	1142.63	2.74	High	0	0.006459
	FALSE	High	KIVTVLLNK		0.0132861	0	9	142	1	A0A0P5BM18; A0A0P5M269; A0A0P5PPT4; A0A0P5XGU4; A0A0P5ECS0; A0A0N8AKQ7; A0A0P5UT23; A0A0P5YRE9; A0A0P5NEQ8	1	1027.69	3.37	High	0	0.007914
	FALSE	High	GRLCGLCGSQNGDKVTDLTGPR	2xCarbamidomethyl [C4; C7]; 1xDeamidated [N/Q]	2.08925e-09	0	7	106	4	A0A0P5BM18; A0A0P5M269; A0A0P5PPT4; A0A0P5XGU4; A0A0P5ECS0; A0A0N8AKQ7; A0A0P5UT23	2	2362.12	6.69	High	0	1.945e-07
	FALSE	High	SLFDTIYGEQIMSQEYVR	1xOxidation [M12]	6.41011e-05	0	10	94	1	A0A0P5I0U9; A0A0P5BM18; A0A0P4YK27; A0A0P5GUJ5; A0A0P5PPT4; A0A0P5PJQ0; A0A0P5ECS0; A0A0N8AKQ7; A0A0P5NEQ8; A0A0N8DYK4	0	2195.03	2.86	High	0	1.952e-05
	FALSE	High	EVVVLASPIHR		0.0022308	0	7	76	3	E9HZI6; A0A0P5M269; A0A0P5PPT4; A0A0N8AKQ7; A0A0P5YRE9; E9GVW7; A0A0P5NEQ8	0	1219.72	3.72	High	0	0.001065
	FALSE	High	LAVVQPSVYSK		0.00621283	0	14	125	2	A0A0P5Z193; A0A0P5I0U9; A0A0P5BM18; A0A0P4YK27; A0A0P5GUJ5; A0A0P5PPT4; A0A0P5PJQ0; A0A0P5XGU4; A0A0P6FTA8; A0A0P5ECS0; A0A0N8AKQ7; A0A0P5NEQ8; A0A0N8BQS0; A0A0N8DYK4	0	1190.68	3.16	High	0	0.003369
	FALSE	High	LCGLCGSQNGDKVTDLTGPR	2xCarbamidomethyl [C2; C5]	1.06274e-07	0	7	108	2	A0A0P5BM18; A0A0P5M269; A0A0P5PPT4; A0A0P5XGU4; A0A0P5ECS0; A0A0N8AKQ7; A0A0P5UT23	1	2148.02	4.89	High	0	6.056e-07
	FALSE	High	LCGLCGSQNGDKVTDLTGPR	2xCarbamidomethyl [C2; C5]; 1xDeamidated [N9]	8.15183e-09	0	7	108	4	A0A0P5BM18; A0A0P5M269; A0A0P5PPT4; A0A0P5XGU4; A0A0P5ECS0; A0A0N8AKQ7; A0A0P5UT23	1	2149	6.14	High	0	8.091e-10
	FALSE	High	ISDFTPAILLSETK		4.4637e-05	0	8	109	1	A0A0P5Z193; A0A0P5I0U9; A0A0P5BM18; A0A0P4YK27; A0A0P5PPT4; A0A0P6FTA8; A0A0P5ECS0; A0A0N8AKQ7	0	1534.84	4.06	High	0	1.303e-05
	FALSE	High	IGSSIVYGMDGK	1xOxidation [M9]	0.00385394	0	13	138	1	A0A0P5Z193; A0A0P5BM18; A0A0P4YK27; A0A0P5GUJ5; A0A0P5PPT4; A0A0P5PJQ0; A0A0P5XGU4; A0A0P5ECS0; A0A0N8AKQ7; A0A0P5KLT7; A0A0P5UT23; A0A0P5YRE9; A0A0P5NEQ8	0	1242.6	3.29	High	0	0.001964
	FALSE	High	AVMTIKYNEMPAVVR	2xOxidation [M3; M10]	0.0313497	0	11	151	1	A0A0P5Z193; A0A0P5BM18; A0A0P5M269; A0A0P5PPT4; A0A0P5XGU4; A0A0P5ECS0; A0A0N8AKQ7; A0A0P5KLT7; A0A0P5UT23; A0A0P5YRE9; A0A0P5NEQ8	1	1753.9	2.67	High	0	0.02089
	FALSE	High	IVTVLLNKEK		0.062344	0	9	139	1	A0A0P5BM18; A0A0P5M269; A0A0P5PPT4; A0A0P5XGU4; A0A0P5ECS0; A0A0N8AKQ7; A0A0P5UT23; A0A0P5YRE9; A0A0P5NEQ8	1	1156.73	2.18	High	0	0.04544
	FALSE	High	FFTINPNTIFR		0.00643025	0	19	164	3	A0A0P5XPE2; A0A0P5BM18; A0A0P5S327; A0A0P4YK27; A0A0P5IAS3; A0A0P5I5B7; A0A0P5PPT4; A0A0P5PJQ0; A0A0P5XGU4; A0A0P6FTA8; A0A0P5ECS0; A0A0N8AKQ7; A0A0P5R4V4; A0A0P5KLT7; A0A0P5UT23; A0A0P5NG35; A0A0P6EEN9; A0A0P5NEQ8; A0A0N8DYK4	0	1369.73	2.68	High	0	0.004597
	FALSE	High	IEGALKPVVVSK		0.000210513	0	13	162	6	A0A0P5XPE2; A0A0P5BM18; A0A0P5I5B7; A0A0P5PPT4; A0A0P5XGU4; A0A0P6FTA8; A0A0P5ECS0; A0A0N8AKQ7; A0A0P5KLT7; A0A0P5NG35; A0A0P5NEQ8; A0A0N8BQS0; A0A0N8DYK4	0	1239.77	3.92	High	0	7.445e-05
	FALSE	High	SEEDISPSLR		0.0253406	0	9	129	1	A0A0P5Z193; A0A0P5BM18; A0A0P5PPT4; A0A0P5XGU4; A0A0P5ECS0; A0A0N8AKQ7; A0A0P5KLT7; A0A0P5YRE9; A0A0P5NEQ8	0	1132.55	2.73	High	0	0.01641
	FALSE	High	LMEISIDSK		0.0556828	0	17	161	1	A0A0P5Z193; A0A0P5XPE2; A0A0P5BM18; A0A0P5S327; A0A0P5GUJ5; A0A0P5I5B7; A0A0P5PPT4; A0A0P5PJQ0; A0A0P5XGU4; A0A0P6FTA8; A0A0P5ECS0; A0A0N8AKQ7; A0A0P5KLT7; A0A0P5UT23; A0A0P5NG35; A0A0P6EEN9; A0A0P5NEQ8	0	1035.54	2.39	High	0	0.03997
	FALSE	High	LMEISIDSK	1xOxidation [M2]	0.0476639	0	17	161	1	A0A0P5Z193; A0A0P5XPE2; A0A0P5BM18; A0A0P5S327; A0A0P5GUJ5; A0A0P5I5B7; A0A0P5PPT4; A0A0P5PJQ0; A0A0P5XGU4; A0A0P6FTA8; A0A0P5ECS0; A0A0N8AKQ7; A0A0P5KLT7; A0A0P5UT23; A0A0P5NG35; A0A0P6EEN9; A0A0P5NEQ8	0	1051.53	2.43	High	0	0.03344
	FALSE	High	YNEMPAVVR		0.0851047	0.000973478	11	152	1	A0A0P5Z193; A0A0P5BM18; A0A0P5M269; A0A0P5PPT4; A0A0P5XGU4; A0A0P5ECS0; A0A0N8AKQ7; A0A0P5KLT7; A0A0P5UT23; A0A0P5YRE9; A0A0P5NEQ8	0	1078.53	2.45	High	0.0007147	0.06469
	FALSE	High	RCFSTESVPK	1xCarbamidomethyl [C2]	0.080995	0.000973478	12	119	1	E9HZI6; A0A0P5BM18; A0A0P5M269; A0A0P5PPT4; A0A0P5XGU4; A0A0P5ECS0; A0A0N8AKQ7; A0A0P5UT23; A0A0P5YRE9; E9GVW7; A0A0P5NEQ8; A0A0P5L1A1	1	1210.59	2.99	High	0.0007147	0.06121
	FALSE	High	YNEMPAVVR	1xOxidation [M4]	0.0721274	0.000973478	11	152	1	A0A0P5Z193; A0A0P5BM18; A0A0P5M269; A0A0P5PPT4; A0A0P5XGU4; A0A0P5ECS0; A0A0N8AKQ7; A0A0P5KLT7; A0A0P5UT23; A0A0P5YRE9; A0A0P5NEQ8	0	1094.53	2.47	High	0.0007147	0.05362
	FALSE	High	KITVATTWTR		0.0751824	0.000973478	9	142	2	A0A0P5Z193; A0A0P5BM18; A0A0P5PPT4; A0A0P5XGU4; A0A0P5ECS0; A0A0N8AKQ7; A0A0P5KLT7; A0A0P5YRE9; A0A0P5NEQ8	1	1176.67	3.33	High	0.008045	0.1851
	FALSE	High	QQDSQWESQK		0.115584	0.00283597	17	158	1	A0A0P5I0U9; E9HZI6; A0A0P5BM18; A0A0P5M269; A0A0P4YK27; A0A0P5GUJ5; A0A0P5I5B7; A0A0P5PPT4; A0A0P5PJQ0; A0A0P5XGU4; A0A0P5ECS0; A0A0N8AKQ7; A0A0P5KLT7; A0A0P5UT23; A0A0P5YRE9; E9GVW7; A0A0P5NEQ8	0	1263.56	1.69	High	0.002777	0.09138
	FALSE	High	FAIEGDMK		0.149869	0.00358207	16	149	2	A0A0P5Z193; A0A0P5XPE2; A0A0P5BM18; A0A0P4YK27; A0A0P5GUJ5; A0A0P5I5B7; A0A0P5PPT4; A0A0P6FTA8; A0A0P5ECS0; A0A0N8AKQ7; A0A0P5KLT7; A0A0P5UT23; A0A0P5NG35; A0A0P5NEQ8; A0A0N8BQS0; A0A0N8DYK4	0	910.434	2.01	High	0.00329	0.1224
	FALSE	High	LGFHCLPK	1xCarbamidomethyl [C5]	0.131449	0.00358207	12	122	1	E9HZI6; A0A0P5BM18; A0A0P5M269; A0A0P5PPT4; A0A0P5XGU4; A0A0P5ECS0; A0A0N8AKQ7; A0A0P5UT23; A0A0P5YRE9; E9GVW7; A0A0P5NEQ8; A0A0P5L1A1	0	971.513	2.23	High	0.00329	0.1058
	FALSE	High	ENAGKLDINFHK		0.121804	0.00358207	8	53	1	A0A0P5IAS3; A0A0P5I5B7; A0A0P5PPT4; A0A0P5XGU4; A0A0N8AKQ7; A0A0P5R4V4; A0A0P5KLT7; A0A0P5NG35	1	1385.72	2.02	High	0.00329	0.097
	FALSE	High	LMAETPFTR	1xOxidation [M2]	0.125783	0.00358207	6	50	1	A0A0P5I5B7; A0A0P5PPT4; A0A0P5XGU4; A0A0N8AKQ7; A0A0P5KLT7; A0A0P5NG35	0	1081.53	2.12	High	0.00329	0.1008
	FALSE	High	GIEIHPVAEVILPKR		0.146356	0.00358207	6	108	1	A0A0P5BM18; A0A0P5PPT4; A0A0P5XGU4; A0A0P5ECS0; A0A0N8AKQ7; A0A0P5YRE9	1	1671	1.8	High	0.00329	0.1196
	FALSE	High	IVTVLLNK		0.152253	0.00358207	9	145	2	A0A0P5BM18; A0A0P5M269; A0A0P5PPT4; A0A0P5XGU4; A0A0P5ECS0; A0A0N8AKQ7; A0A0P5UT23; A0A0P5YRE9; A0A0P5NEQ8	0	899.592	2.75	High	0.00329	0.1251
	FALSE	High	LVGKPGLR		0.185741	0.00607653	19	162	1	A0A0P5Z193; E9HZI6; A0A0P5BM18; A0A0P5S327; A0A0P5GUJ5; A0A0P5I5B7; A0A0P5PPT4; A0A0P5PJQ0; A0A0P5XGU4; A0A0P6FTA8; A0A0P5ECS0; A0A0N8AKQ7; A0A0P5KLT7; A0A0P5UT23; A0A0P5NG35; E9GVW7; A0A0P6EEN9; A0A0P5NEQ8; A0A0N8DYK4	0	839.546	1.78	High	0.005091	0.1564
	FALSE	High	VTDLTGPR		0.19825	0.00767163	10	120	1	E9HZI6; A0A0P5BM18; A0A0P5M269; A0A0P5PPT4; A0A0P5XGU4; A0A0P5ECS0; A0A0N8AKQ7; A0A0P5UT23; A0A0P5YRE9; E9GVW7	0	858.468	2.15	High	0.006261	0.1686
FALSE	High	Master Protein	A0A0P5EKW5	Vitellogenin-1 OS=Daphnia magna PE=4 SV=1	0	320.605	47.4606	68	111	5	1	1713	192.4	7.01	316.15	68
	Checked	Confidence	Sequence	Modifications	Qvality PEP	Qvality q-value	# Protein Groups	# Proteins	# PSMs	Master Protein Accessions	# Missed Cleavages	Theo. MH+ [Da]	XCorr Sequest HT	Confidence Sequest HT	Percolator q-Value Sequest HT	Percolator PEP Sequest HT
	FALSE	High	SDVSAELSWK		0.0233684	0	5	133	1	A0A0P5VX15; A0A0N8E8E6; A0A0P5Z4G7; A0A0P5EKW5; A0A0P6B5M1	0	1121.55	2.34	High	0	0.01495
	FALSE	High	SVSTYFQYQYATK		0.00110081	0	4	147	1	A0A0P5VX15; A0A0N8E8E6; A0A0P5EKW5; A0A0P6B5M1	0	1585.75	3.24	High	0	0.0004808
	FALSE	High	AGLLHINLMGSVNR		0.00213678	0	4	98	1	A0A0N8E8E6; A0A0P5Z4G7; A0A0P5EKW5; A0A0P6B5M1	0	1494.82	3.93	High	0	0.001012
	FALSE	High	IHPLLVNLASNTAER		0.000199906	0	4	78	4	A0A0N8E8E6; A0A0P5Z4G7; A0A0P5EKW5; A0A0P6B5M1	0	1647.92	4.24	High	0	0.0001079
	FALSE	High	TCGVCGDFNQEVAGEFK	2xCarbamidomethyl [C2; C5]	2.22544e-06	0	2	95	2	A0A0P5EKW5; A0A0P6B5M1	0	1917.81	3.98	High	0	4.445e-07
	FALSE	High	VIVQSIDENTIVVK		0.000950839	0	3	44	4	A0A0P5AHV2; A0A0P5EKW5; A0A0P6B5M1	0	1556.89	3.85	High	0	0.0004071
	FALSE	High	DLATGFMYGSPACTEAR	1xCarbamidomethyl [C13]	6.88085e-06	0	2	94	1	A0A0P5VX15; A0A0P5EKW5	0	1846.81	4.37	High	0	1.583e-06
	FALSE	High	DLATGFMYGSPACTEAR	1xCarbamidomethyl [C13]; 1xOxidation [M7]	8.70387e-05	0	2	94	1	A0A0P5VX15; A0A0P5EKW5	0	1862.8	4.39	High	0	2.759e-05
	FALSE	High	GIWEELNATPRPADK		0.0647304	0	3	97	1	A0A0N8E8E6; A0A0P5EKW5; A0A0P6B5M1	0	1696.87	1.37	High	0	0.04731
	FALSE	High	TCGVCGDFNQEVAGEFKTPQR	2xCarbamidomethyl [C2; C5]	0.00129657	0	2	91	1	A0A0P5EKW5; A0A0P6B5M1	1	2400.07	3.63	High	0	0.000576
	FALSE	High	GIWEELNATPRPADKR		0.0222967	0	3	97	2	A0A0N8E8E6; A0A0P5EKW5; A0A0P6B5M1	1	1852.97	2.66	High	0	0.02224
	FALSE	High	RDGIFNYESVPAEEETK		0.000246892	0	4	46	1	A0A0P5Z4G7; A0A0P5EKW5; A0A0P6B5M1; A0A0P5ZZ90	1	1983.93	4.15	High	0	8.902e-05
	FALSE	High	GGIKSDVSAELSWK		0.0037557	0	5	124	1	A0A0P5VX15; A0A0N8E8E6; A0A0P5Z4G7; A0A0P5EKW5; A0A0P6B5M1	1	1476.77	2.48	High	0	0.001914
	FALSE	High	CAVSEGELMAASFK	1xCarbamidomethyl [C1]; 1xOxidation [M9]	8.44529e-05	0	2	110	2	A0A0P5EKW5; A0A0P6B5M1	0	1515.68	3.02	High	0	2.666e-05
	FALSE	High	DVLYLTEEDQIAFGEQCDQSK	1xCarbamidomethyl [C17]	5.11137e-06	0	4	120	2	A0A0P5VX15; A0A0N8E8E6; A0A0P5EKW5; A0A0P6B5M1	0	2488.12	2.97	High	0	1.137e-06
	FALSE	High	CAVSEGELMAASFK	1xCarbamidomethyl [C1]	6.69232e-05	0	2	110	1	A0A0P5EKW5; A0A0P6B5M1	0	1499.69	3.56	High	0	2.058e-05
	FALSE	High	VTDLLYYHVKPYTVTR		2.46312e-05	0	4	124	2	A0A0P5VX15; A0A0N8E8E6; A0A0P5EKW5; A0A0P6B5M1	0	1968.06	4.61	High	0	1.821e-05
	FALSE	High	ELNFNYDLNNHQIK		0.000146592	0	1	46	2	A0A0P5EKW5	0	1761.86	3.81	High	0	0.0006483
	FALSE	High	QQYAVIELQSR		0.00385394	0	4	47	1	A0A0P5AHV2; A0A0P5Z4G7; A0A0P5EKW5; A0A0P6B5M1	0	1334.71	3.05	High	0	0.001961
	FALSE	High	LEESIPSLISEAMK	1xOxidation [M13]	0.0113853	0	3	93	1	A0A0N8E8E6; A0A0P5EKW5; A0A0P6B5M1	0	1562.8	2.15	High	0	0.006672
	FALSE	High	FLATLPILVSMQGNMKGDGK	2xOxidation [M11; M15]	0.000290808	0	4	117	1	A0A0N8E8E6; A0A0P5Z4G7; A0A0P5EKW5; A0A0P6B5M1	1	2152.11	2.86	High	0	0.0001074
	FALSE	High	LVTVIYGKDTVELDPTGYVTINGDKK		0.000868602	0	3	101	2	A0A0N8DDX1; A0A0P5EKW5; A0A0P6B5M1	2	2838.51	3.33	High	0	0.000368
	FALSE	High	FSPLTFAYSK		0.0258863	0	4	160	1	A0A0N8DDX1; A0A0N8E8E6; A0A0P5EKW5; A0A0P6B5M1	0	1160.6	2.27	High	0	0.01678
	FALSE	High	VAFVVPEKIHPILVNLASNTAER		0.000415813	0	4	77	2	A0A0N8E8E6; A0A0P5Z4G7; A0A0P5EKW5; A0A0P6B5M1	1	2517.42	3.58	High	0	0.00016
	FALSE	High	SIASQLQLDITGVR		5.83045e-05	0	4	46	2	A0A0P5Z4G7; A0A0P5EKW5; A0A0P6B5M1; A0A0P5ZZ90	0	1500.84	3.78	High	0	1.758e-05
	FALSE	High	VELPFNGNYIASGVDVR	1xDeamidated [N6]	0.000214172	0	4	135	4	A0A0P5VX15; A0A0N8E8E6; A0A0P5EKW5; A0A0P6B5M1	0	1850.93	3.72	High	0	7.616e-05
	FALSE	High	VPSEPEVISTSTIAPEFRPVLGR		2.72495e-06	0	3	93	1	A0A0P5VX15; A0A0N8E8E6; A0A0P5EKW5	0	2481.33	4.29	High	0	5.588e-07
	FALSE	High	MAAMSLLFMSNAPQSIWQK	3xOxidation [M1; M4; M9]	0.0265566	0	4	96	1	A0A0N8E8E6; A0A0P5Z4G7; A0A0P5EKW5; A0A0P6B5M1	0	2202.04	2.06	High	0	0.01729
	FALSE	High	VELPFNGNYIASGVDVR		0.000238528	0	4	135	2	A0A0P5VX15; A0A0N8E8E6; A0A0P5EKW5; A0A0P6B5M1	0	1849.94	3.71	High	0	8.594e-05
	FALSE	High	FASSTWFEPNR		0.00700759	0	3	92	1	A0A0N8E8E6; A0A0P5EKW5; A0A0P6B5M1	0	1341.62	3.23	High	0	0.003864
	FALSE	High	VLPMFSLDELK		0.0399202	0	4	85	1	A0A0P5AHV2; A0A0P5Z4G7; A0A0P5EKW5; A0A0P6B5M1	0	1291.7	2.22	High	0	0.02737
	FALSE	High	KSIASQLQLDITGVR		4.36857e-05	0	4	46	1	A0A0P5Z4G7; A0A0P5EKW5; A0A0P6B5M1; A0A0P5ZZ90	1	1628.93	3.59	High	0	1.272e-05
	FALSE	High	VLPMFSLDELK	1xOxidation [M4]	0.0236694	0	4	85	1	A0A0P5AHV2; A0A0P5Z4G7; A0A0P5EKW5; A0A0P6B5M1	0	1307.69	2	High	0	0.01521
	FALSE	High	DTVELDPTGYVTINGDKK	1xDeamidated [N14]	0.000289558	0	3	107	2	A0A0N8DDX1; A0A0P5EKW5; A0A0P6B5M1	1	1965.97	4.17	High	0	0.0001067
	FALSE	High	AVVYPHPDSLIMEIK	1xOxidation [M12]	0.0187139	0	2	100	2	A0A0P5EKW5; A0A0P6B5M1	0	1727.9	3.21	High	0	0.01167
	FALSE	High	IADEHWPVFLANR		0.00906846	0	1	38	1	A0A0P5EKW5	0	1567.8	3.05	High	0	0.005141
	FALSE	High	SIASQLQLDITGVRR		0.0294129	0	4	46	1	A0A0P5Z4G7; A0A0P5EKW5; A0A0P6B5M1; A0A0P5ZZ90	1	1656.94	2.25	High	0	0.01941
	FALSE	High	DGIFNYESVPAEEETK		5.63292e-05	0	4	46	1	A0A0P5Z4G7; A0A0P5EKW5; A0A0P6B5M1; A0A0P5ZZ90	0	1827.83	3.57	High	0	1.692e-05
	FALSE	High	RGDETVNQWAR		2.81507e-05	0	4	160	1	A0A0N8DDX1; A0A0N8E8E6; A0A0P5EKW5; A0A0P6B5M1	1	1331.65	4.01	High	0	7.735e-06
	FALSE	High	YQSKPYEVSVTK		0.00260483	0	2	71	2	A0A0N8E8E6; A0A0P5EKW5	0	1428.74	2.81	High	0	0.01045
	FALSE	High	DLKETPDSEKDNIER		2.7963e-06	0	4	77	6	A0A0P5AHV2; A0A0P5Z4G7; A0A0P5EKW5; A0A0P6B5M1	2	1788.86	4.98	High	0	4.37e-06
	FALSE	High	QTTLASIADLLNSVCGSR	1xCarbamidomethyl [C15]; 1xDeamidated [N12]	0.000589447	0	4	80	1	A0A0N8E8E6; A0A0P5Z4G7; A0A0P5EKW5; A0A0P6B5M1	0	1906.95	2.21	High	0	0.0002373
	FALSE	High	QTTLASIADLLNSVCGSR	1xCarbamidomethyl [C15]	0.000115168	0	4	80	1	A0A0N8E8E6; A0A0P5Z4G7; A0A0P5EKW5; A0A0P6B5M1	0	1905.97	3.66	High	0	3.774e-05
	FALSE	High	GCSAPNMDDK	1xCarbamidomethyl [C2]	0.0142292	0	1	70	1	A0A0P5EKW5	0	1094.42	2.12	High	0	0.008552
	FALSE	High	NLESGNAHLMK		0.0164597	0	4	133	1	A0A0P5VX15; A0A0N8E8E6; A0A0P5EKW5; A0A0P6B5M1	0	1213.6	3.28	High	0	0.01007
	FALSE	High	NLESGNAHLMK	1xDeamidated [N6]; 1xOxidation [M10]	0.0171795	0	4	133	1	A0A0P5VX15; A0A0N8E8E6; A0A0P5EKW5; A0A0P6B5M1	0	1230.58	2.53	High	0	0.01058
	FALSE	High	AAMYSPAGQQCQK	1xCarbamidomethyl [C11]	0.0200387	0	3	129	1	A0A0N8E8E6; A0A0P5EKW5; A0A0P6B5M1	0	1439.64	1.86	High	0	0.01262
	FALSE	High	AAMYSPAGQQCQK	1xCarbamidomethyl [C11]; 1xOxidation [M3]	0.0163194	0	3	129	1	A0A0N8E8E6; A0A0P5EKW5; A0A0P6B5M1	0	1455.64	1.84	High	0	0.009983
	FALSE	High	ETPDSEKDNLER		0.00334365	0	5	79	4	A0A0P5AHV2; A0A0P5PE20; A0A0P5Z4G7; A0A0P5EKW5; A0A0P6B5M1	1	1432.66	3.05	High	0	0.001679
	FALSE	High	KAGEKVENLR		0.0522854	0	3	99	1	A0A0N8E8E6; A0A0P5EKW5; A0A0P6B5M1	2	1143.65	1.87	High	0	0.03727
	FALSE	High	SLIESITNMPPSVPYLEELIK	1xOxidation [M9]	0.0466703	0	2	46	1	A0A0P5JS25; A0A0P5EKW5	0	2389.26	2.03	High	0	0.03279
	FALSE	High	ELESSQSTTDR		0.0224879	0	4	82	1	A0A0N8E8E6; A0A0P5JS25; A0A0P5EKW5; A0A0P6B5M1	0	1252.57	2.06	High	0	0.01437
	FALSE	High	GCSAPNMDDKISR	1xCarbamidomethyl [C2]	0.00164313	0	1	69	2	A0A0P5EKW5	1	1450.64	3.4	High	0	0.0007517
	FALSE	High	GCSAPNMDDKISR	1xCarbamidomethyl [C2]; 1xOxidation [M7]	0.0032444	0	1	69	1	A0A0P5EKW5	1	1466.64	3.24	High	0	0.001618
	FALSE	High	QSEIAVTAHQGR		0.000278545	0	3	131	2	A0A0N8DDX1; A0A0P5EKW5; A0A0P6B5M1	0	1296.67	3.51	High	0	0.0003522
	FALSE	High	KVDFAVCHTATR	1xCarbamidomethyl [C7]	9.61052e-05	0	3	131	2	A0A0N8E8E6; A0A0P5EKW5; A0A0P6B5M1	1	1404.71	3.92	High	0	3.084e-05
	FALSE	High	LMEHSESDFSDK		0.000130495	0	4	105	2	A0A0P5VX15; A0A0N8E8E6; A0A0P5EKW5; A0A0P6B5M1	0	1424.6	3.02	High	0	0.003845
	FALSE	High	LMEHSESDFSDK	1xOxidation [M2]	0.0023491	0	4	105	3	A0A0P5VX15; A0A0N8E8E6; A0A0P5EKW5; A0A0P6B5M1	0	1440.59	3.13	High	0	0.006386
	FALSE	High	TSQHSVVYESGSPQSR		0.00242098	0	2	47	1	A0A0N8E8E6; A0A0P5EKW5	0	1748.82	2.8	High	0	0.001166
	FALSE	High	GTPGKFDDTAER		0.00872459	0	4	91	2	A0A0N8E8E6; A0A0P5JS25; A0A0P5EKW5; A0A0P6B5M1	1	1293.61	3.16	High	0	0.007816
	FALSE	High	ELVETEQITGAK		0.00218328	0	5	84	1	A0A0N8E8E6; A0A0P5Z4G7; A0A0P5JS25; A0A0P5EKW5; A0A0P6B5M1	0	1317.69	3.31	High	0	0.001039
	FALSE	High	STHMEEGVAVMMYSPNFR	1xOxidation [M12]	0.000753502	0	1	27	1	A0A0P5EKW5	0	2101.91	4.55	High	0	0.0003137
	FALSE	High	STHMEEGVAVMMYSPNFR	2xOxidation [M11; M]	0.00119984	0	1	27	2	A0A0P5EKW5	0	2117.91	4.03	High	0	0.002755
	FALSE	High	STHMEEGVAVMMYSPNFR	3xOxidation [M4; M11; M12]	1.25775e-05	0	1	27	1	A0A0P5EKW5	0	2133.9	4.44	High	0	3.134e-06
	FALSE	High	ETETCQPIDQQYHTHLPEYDTNAPTK	1xCarbamidomethyl [C5]	1.36504e-05	0	2	47	1	A0A0P5R7A0; A0A0P5EKW5	0	3116.39	3.93	High	0	3.429e-06
	FALSE	High	NWNKPPTYGFSK		0.00247367	0	4	127	2	A0A0P5VX15; A0A0N8E8E6; A0A0P5EKW5; A0A0P6B5M1	0	1438.71	3.25	High	0	0.001771
	FALSE	High	VQGSHVELTAPQYLR		5.44208e-05	0	2	68	2	A0A0P5R7A0; A0A0P5EKW5	0	1697.9	4.01	High	0	0.002752
	FALSE	High	KETETCQPIDQQYHTHLPEYDTNAPTK	1xCarbamidomethyl [C6]	2.18742e-06	0	2	47	1	A0A0P5R7A0; A0A0P5EKW5	1	3244.49	4.67	High	0	4.36e-07
	FALSE	High	YIACGESFPK	1xCarbamidomethyl [C4]	0.0407733	0	4	61	1	A0A0P5PE20; A0A0P5Z4G7; A0A0P5EKW5; A0A0P6B5M1	0	1171.55	2.37	High	0	0.02808
	FALSE	High	CQHNPVWSTANPATHSCDFGK	2xCarbamidomethyl [C1; C17]	1.79416e-06	0	4	45	1	A0A0P5PE20; A0A0P5Z4G7; A0A0P5EKW5; A0A0P6B5M1	0	2414.04	4.19	High	0	3.488e-07
	FALSE	High	CQHNPVWSTANPATHSCDFGK	2xCarbamidomethyl [C1; C17]; 1xDeamidated [N11]	5.47614e-06	0	4	45	1	A0A0P5PE20; A0A0P5Z4G7; A0A0P5EKW5; A0A0P6B5M1	0	2415.02	3.26	High	0	1.228e-06
	FALSE	High	IVTVIYGK		0.0890448	0.000973478	3	131	2	A0A0N8DDX1; A0A0P5EKW5; A0A0P6B5M1	0	892.55	2.54	High	0.0007147	0.06793
	FALSE	High	LSSEIRVELPFNGNYIASGVDVR	1xDeamidated [N]	0.0847548	0.000973478	4	132	4	A0A0P5VX15; A0A0N8E8E6; A0A0P5EKW5; A0A0P6B5M1	1	2536.3	1.77	High	0.0007147	0.06415
	FALSE	High	QLLHEFINLLK		0.0844063	0.000973478	5	83	4	A0A0N8E8E6; A0A0P5Z4G7; A0A0P5JS25; A0A0P5EKW5; A0A0P6B5M1	0	1367.8	3.04	High	0.0007147	0.06386
	FALSE	High	AGLLHINLMGSVNR	1xOxidation [M9]	0.104868	0.0018991	4	98	1	A0A0N8E8E6; A0A0P5Z4G7; A0A0P5EKW5; A0A0P6B5M1	0	1510.82	1.85	High	0.001394	0.08184
	FALSE	High	MLAEYNAR		0.133034	0.00358207	4	123	1	A0A0N8E8E6; A0A0P5Z4G7; A0A0P5EKW5; A0A0P6B5M1	0	967.467	1.84	High	0.00329	0.1072
	FALSE	High	YTTSDPSAR		0.117941	0.00358207	4	136	1	A0A0P5VX15; A0A0N8E8E6; A0A0P5EKW5; A0A0P6B5M1	0	997.459	1.52	High	0.00329	0.09338
	FALSE	High	FPTELGLPMR		0.121804	0.00358207	4	164	1	A0A0N8E8E6; A0A0P5Z4G7; A0A0P5EKW5; A0A0P6B5M1	0	1160.61	1.96	High	0.00329	0.09696
	FALSE	High	VAFVVPEK		0.131449	0.00358207	5	97	1	A0A0N8E8E6; A0A0P5Z4G7; A0A0P5JS25; A0A0P5EKW5; A0A0P6B5M1	0	888.519	2.19	High	0.00329	0.1055
	FALSE	High	NLESGNAHLMK	1xOxidation [M10]	0.157123	0.00444016	4	133	1	A0A0P5VX15; A0A0N8E8E6; A0A0P5EKW5; A0A0P6B5M1	0	1229.59	1.93	High	0.003911	0.1297
	FALSE	High	MLAEYNAR	1xOxidation [M1]	0.177327	0.00607653	4	123	1	A0A0N8E8E6; A0A0P5Z4G7; A0A0P5EKW5; A0A0P6B5M1	0	983.461	2.3	High	0.005091	0.1486
	FALSE	High	TLNYPTMTLFVDCVVQSGSNPAVMLIK	1xCarbamidomethyl [C13]; 1xDeamidated [N3]; 2xOxidation [M7; M24]	0.186457	0.00607653	2	19	1	A0A0N8E8E6; A0A0P5EKW5	0	3031.48	1.42	High	0.005091	0.1568
	FALSE	High	DFTDIQIEK		0.210676	0.00932965	3	181	1	A0A0N8E8E6; A0A0P5EKW5; A0A0P6B5M1	0	1108.55	2	High	0.007458	0.1804
FALSE	High	Master Protein	A0A0P6GLG4	Vitellogenin-1 OS=Daphnia magna PE=4 SV=1	0	289.814	50.8798	58	98	1	1	1364	150.8	8.95	285.14	58
	Checked	Confidence	Sequence	Modifications	Qvality PEP	Qvality q-value	# Protein Groups	# Proteins	# PSMs	Master Protein Accessions	# Missed Cleavages	Theo. MH+ [Da]	XCorr Sequest HT	Confidence Sequest HT	Percolator q-Value Sequest HT	Percolator PEP Sequest HT
	FALSE	High	IYAGGHTLELNPVSSGVEVK		1.48081e-07	0	5	49	4	A0A0P6GLG4; A0A0P5PVY3; A0A0P6I5H6; A0A0P5VU45; A0A0P6ALQ8	0	2070.09	6.04	High	0	2.113e-08
	FALSE	High	AGFVGICDVAPK	1xCarbamidomethyl [C7]	0.000950839	0	8	89	1	A0A0P5ICU5; A0A0P6GLG4; A0A0P5PVY3; E9G583; A0A0P6I5H6; A0A0P5VU45; A0A0P6ALQ8; A0A0P5NAS6	0	1233.63	3.18	High	0	0.0004073
	FALSE	High	TTGPSLPLAVK		0.0322959	0	6	70	1	A0A0P5ICU5; A0A0P6GLG4; A0A0P5PVY3; E9G583; A0A0P6I5H6; A0A0P6ALQ8	0	1083.64	2.32	High	0	0.02156
	FALSE	High	GAITLLGTPER		0.0460839	0	5	81	1	A0A0P6CV29; A0A0P6GLG4; A0A0P6I5H6; A0A0P6ALQ8; A0A0P5NAS6	0	1127.64	2.73	High	0	0.03224
	FALSE	High	CKENIPTPPCVAEPLSIGER	2xCarbamidomethyl [C1; C10]	0.000118184	0	5	32	2	A0A0P5ICU5; A0A0P5ZGA6; A0A0P6GLG4; A0A0P6I5H6; A0A0P6ALQ8	1	2267.12	4.97	High	0	3.889e-05
	FALSE	High	SGSVPHAVRPHVIFALQPIAAVNR		0.00685859	0	5	53	1	A0A0P4YJX7; A0A0P6GLG4; E9G583; A0A0P6ALQ8; A0A0P5NAS6	0	2536.43	2.76	High	0	0.003771
	FALSE	High	LDTLKDLLQK		0.00174525	0	7	52	2	A0A0P4YJX7; A0A0P6GLG4; E9GNT0; E9G583; A0A0P4X6K5; A0A0P6ALQ8; A0A0P5NAS6	1	1186.7	4.17	High	0	0.0008077
	FALSE	High	THPEMIVALSTLR		0.00140109	0	6	55	1	A0A0P4YJX7; A0A0P6GLG4; A0A0P5K2V7; E9G583; A0A0P6ALQ8; A0A0P5NAS6	0	1467.8	2.48	High	0	0.0006286
	FALSE	High	THPEMIVALSTLR	1xOxidation [M5]	0.00448039	0	6	55	2	A0A0P4YJX7; A0A0P6GLG4; A0A0P5K2V7; E9G583; A0A0P6ALQ8; A0A0P5NAS6	0	1483.79	4.01	High	0	0.002324
	FALSE	High	SQDALVAITPLYYQLSR	1xPhospho [T9]	0.0597918	0	1	1	1	A0A0P6GLG4	0	2018	1.87	High	0	0.04326
	FALSE	High	ISEYSYVPLEIMIR	1xOxidation [M12]	0.00207333	0	3	32	1	A0A0P6GLG4; A0A0P6ALQ8; A0A0P5NAS6	0	1728.89	2.33	High	0	0.0009763
	FALSE	High	ISEYSYVPLEIMIR		0.0151088	0	3	32	1	A0A0P6GLG4; A0A0P6ALQ8; A0A0P5NAS6	0	1712.89	2.39	High	0	0.009159
	FALSE	High	ENIPTPPCVAEPLSIGER	1xCarbamidomethyl [C8]	0.000216958	0	5	32	1	A0A0P5ICU5; A0A0P5ZGA6; A0A0P6GLG4; A0A0P6I5H6; A0A0P6ALQ8	0	1978.99	3.25	High	0	7.707e-05
	FALSE	High	ANDAGLPVGVGLSTPGFAR		1.48434e-06	0	4	63	2	A0A0P6GLG4; A0A0P5PVY3; A0A0P6I5H6; A0A0P6ALQ8	0	1798.94	5.11	High	0	2.827e-07
	FALSE	High	ANDAGLPVGVGLSTPGFAR	1xDeamidated [N2]	0.00125806	0	4	63	1	A0A0P6GLG4; A0A0P5PVY3; A0A0P6I5H6; A0A0P6ALQ8	0	1799.93	3.03	High	0	0.0005582
	FALSE	High	DNVIQYIVVSK		0.0219192	0	6	36	1	A0A0P5ICU5; A0A0P6GLG4; A0A0P5PVY3; E9G583; A0A0P6I5H6; A0A0P6ALQ8	0	1277.71	1.73	High	0	0.01394
	FALSE	High	WNVEVNVESEPFNVK		3.57467e-06	0	6	69	1	A0A0P6CV29; A0A0P6GLG4; A0A0P5PVY3; A0A0P6I5H6; A0A0P6ALQ8; A0A0P5NAS6	0	1789.88	4.47	High	0	7.587e-07
	FALSE	High	YFVQVPVLK		0.0273602	0	6	60	1	A0A0P5ZGA6; A0A0P6GLG4; A0A0P5PVY3; E9G583; A0A0P6I5H6; A0A0P6ALQ8	0	1092.65	2.31	High	0	0.01786
	FALSE	High	DFKLDTLKDLLQK		3.24515e-05	0	5	49	2	A0A0P6GLG4; E9G583; A0A0P4X6K5; A0A0P6ALQ8; A0A0P5NAS6	2	1576.89	4.82	High	0	9.11e-06
	FALSE	High	NPCVKPIANQLQLLLR	1xCarbamidomethyl [C3]	0.000457151	0	2	34	1	A0A0P6GLG4; A0A0P6ALQ8	0	1877.08	3.22	High	0	0.0001788
	FALSE	High	SYVLDIQYANMSPR		0.000150431	0	4	51	1	A0A0P6GLG4; A0A0P6I5H6; A0A0P5VU45; A0A0P6ALQ8	0	1656.81	4.38	High	0	5.098e-05
	FALSE	High	SYVLDIQYANMSPR	1xDeamidated [N10]; 1xOxidation [M11]	0.000294591	0	4	51	1	A0A0P6GLG4; A0A0P6I5H6; A0A0P5VU45; A0A0P6ALQ8	0	1673.78	2.86	High	0	0.0001089
	FALSE	High	KWNVEVNVESEPFNVK		3.96408e-06	0	6	69	2	A0A0P6CV29; A0A0P6GLG4; A0A0P5PVY3; A0A0P6I5H6; A0A0P6ALQ8; A0A0P5NAS6	1	1917.97	4.85	High	0	9.134e-05
	FALSE	High	NQEVLNFMMTTFR	1xOxidation [M]	0.000950839	0	5	48	2	A0A0P6GLG4; E9G583; A0A0P4X6K5; A0A0P6ALQ8; A0A0P5NAS6	0	1646.77	3.3	High	0	0.0004062
	FALSE	High	NQEVLNFMMTTFR	2xOxidation [M8; M9]	0.00159433	0	5	48	2	A0A0P6GLG4; E9G583; A0A0P4X6K5; A0A0P6ALQ8; A0A0P5NAS6	0	1662.76	2.78	High	0	0.0007296
	FALSE	High	SGIVGPMTQACYEAVLHYATPR	1xCarbamidomethyl [C11]; 1xOxidation [M7]	8.98366e-08	0	6	60	1	A0A0P6GLG4; A0A0P5PVY3; E9G583; A0A0P6I5H6; A0A0P6ALQ8; A0A0P5NAS6	0	2437.16	4.72	High	0	1.201e-08
	FALSE	High	EVSFVWGEAPADQCPK	1xCarbamidomethyl [C14]	0.00262736	0	6	54	1	A0A0P6GLG4; A0A0P5PVY3; A0A0P5P4Y7; A0A0P6I5H6; A0A0P6ALQ8; A0A0P5NAS6	0	1819.83	2.94	High	0	0.001278
	FALSE	High	VDNNKPYVLSDKDNVIQYIVVSK		2.74199e-07	0	4	24	2	A0A0P6GLG4; A0A0P5PVY3; A0A0P6I5H6; A0A0P6ALQ8	1	2650.41	5.38	High	0	5.414e-07
	FALSE	High	VDNNKPYVLSDKDNVIQYIVVSK	1xDeamidated [N]	0.000128819	0	4	24	2	A0A0P6GLG4; A0A0P5PVY3; A0A0P6I5H6; A0A0P6ALQ8	1	2651.39	4.14	High	0	5.205e-05
	FALSE	High	VDNNKPYVLSDKDNVIQYIVVSK	2xDeamidated [N4; N14]	0.00334365	0	4	24	1	A0A0P6GLG4; A0A0P5PVY3; A0A0P6I5H6; A0A0P6ALQ8	1	2652.38	3.11	High	0	0.001673
	FALSE	High	ENINELLGMESHVEVYNCETYTGK	1xCarbamidomethyl [C18]; 1xOxidation [M9]	3.73205e-06	0	8	65	2	A0A0P6CV29; A0A0P6GLG4; A0A0P5PVY3; A0A0P5P4Y7; E9G583; A0A0P6I5H6; A0A0P6ALQ8; A0A0P5NAS6	0	2845.27	4.39	High	0	7.977e-07
	FALSE	High	ELVSPSGCNVK	1xCarbamidomethyl [C8]	0.00963039	0	6	50	1	A0A0P5ZGA6; A0A0P6GLG4; A0A0P5PVY3; E9G583; A0A0P6I5H6; A0A0P6ALQ8	0	1189.59	2.81	High	0	0.00552
	FALSE	High	MVAFLPFYLR	1xOxidation [M1]	0.00527612	0	2	19	1	A0A0P6GLG4; A0A0P5K2V7	0	1272.68	2.76	High	0	0.0028
	FALSE	High	VAGAGHIELK		0.00887579	0	8	83	2	A0A0P5ICU5; A0A0P6GLG4; A0A0P5PVY3; A0A164IBM4; A0A0P6I5H6; A0A0P5VU45; A0A0P6ALQ8; A0A0P5NAS6	0	994.568	3.06	High	0	0.005038
	FALSE	High	LLTSWEDLLK		0.0228751	0	3	61	1	A0A0P6GLG4; E9G583; A0A0P6ALQ8	0	1217.68	2.04	High	0	0.01461
	FALSE	High	QQAPMKMEILLR	2xOxidation [M5; M7]	0.0511983	0	4	56	2	A0A0P6GLG4; E9G583; A0A0P4X6K5; A0A0P6ALQ8	1	1489.79	2.45	High	0	0.03633
	FALSE	High	ALSYLKDTCSECESK	2xCarbamidomethyl [C9; C12]	9.50548e-06	0	5	63	1	A0A0P6GLG4; A0A0P5PVY3; A0A0P5P4Y7; A0A0P6I5H6; A0A0P6ALQ8	1	1790.79	4.39	High	0	2.282e-06
	FALSE	High	HMGMEEIAGLMEGK	2xOxidation [M4; M11]	0.0578229	0	3	52	2	A0A0P6GLG4; A0A0P6ALQ8; A0A0P5NAS6	0	1564.68	2.19	High	0	0.04167
	FALSE	High	HMGMEEIAGLMEGK	3xOxidation [M2; M4; M11]	0.000883698	0	3	52	2	A0A0P6GLG4; A0A0P6ALQ8; A0A0P5NAS6	0	1580.68	4.42	High	0	0.001171
	FALSE	High	TAWAALPEDIFETPSSIEPSVQR		7.84886e-05	0	5	28	2	A0A0P6GLG4; A0A0P5PVY3; A0A0P5P4Y7; A0A0P6I5H6; A0A0P6ALQ8	0	2544.26	3.59	High	0	2.453e-05
	FALSE	High	KVAGAGHLELK		0.00100128	0	8	82	4	A0A0P5ICU5; A0A0P6GLG4; A0A0P5PVY3; A0A164IBM4; A0A0P6I5H6; A0A0P5VU45; A0A0P6ALQ8; A0A0P5NAS6	1	1122.66	4.21	High	0	0.000676
	FALSE	High	TQSECTNVPR	1xCarbamidomethyl [C5]	0.0191183	0	3	47	1	A0A0P6GLG4; E9G583; A0A0P6ALQ8	0	1191.54	1.56	High	0	0.01193
	FALSE	High	MGHNSFGATNCAGK	1xCarbamidomethyl [C11]	0.0266699	0	2	46	1	A0A0P6GLG4; A0A0P6ALQ8	0	1451.62	2.51	High	0	0.01738
	FALSE	High	MGHNSFGATNCAGK	1xCarbamidomethyl [C11]; 1xDeamidated [N4]	0.0520662	0	2	46	1	A0A0P6GLG4; A0A0P6ALQ8	0	1452.6	2.32	High	0	0.03704
	FALSE	High	MGHNSFGATNCAGK	1xCarbamidomethyl [C11]; 1xOxidation [M1]	0.0157025	0	2	46	1	A0A0P6GLG4; A0A0P6ALQ8	0	1467.61	2.02	High	0	0.009563
	FALSE	High	LKMDSAVPAGK	1xOxidation [M3]	0.0329889	0	7	85	1	A0A0P6CV29; A0A0P6GLG4; A0A0P5PVY3; A0A0P5P4Y7; A0A0P6I5H6; A0A0P6ALQ8; A0A0P5NAS6	1	1132.6	1.78	High	0	0.02212
	FALSE	High	HQLAYGNVNQPTK		0.00731536	0	3	56	1	A0A0P6GLG4; A0A0P6I5H6; A0A0P6ALQ8	0	1469.75	3.58	High	0	0.004052
	FALSE	High	VQGNITEAQR		0.00605459	0	6	47	1	A0A0P6GLG4; A0A0P5PVY3; E9G583; A0A0P6I5H6; A0A0P6ALQ8; A0A0P5NAS6	0	1115.58	1.84	High	0	0.003262
	FALSE	High	NVANDEELKNLFNEILPTTGTNPAALMVK	1xDeamidated [N]; 1xOxidation [M27]	0.0275941	0	2	25	3	A0A0P6GLG4; A0A0P6ALQ8	1	3173.6	2.24	High	0	0.01805
	FALSE	High	SQHCGLCGDYNGQFSR	2xCarbamidomethyl [C4; C7]	7.00046e-06	0	5	52	2	A0A0P5ZGA6; A0A0P6GLG4; A0A0P5PVY3; A0A0P6I5H6; A0A0P6ALQ8	0	1885.77	4.37	High	0	2.075e-05
	FALSE	High	GAITLLGTPERK		0.0014754	0	5	80	2	A0A0P6CV29; A0A0P6GLG4; A0A0P6I5H6; A0A0P6ALQ8; A0A0P5NAS6	1	1255.74	3.03	High	0	0.0006665
	FALSE	High	IHLPANLLVGFSPADSQVEIK		0.000160474	0	4	54	1	A0A0P6GLG4; A0A0P6I5H6; A0A0P6ALQ8; A0A0P5NAS6	0	2248.23	4.17	High	0	5.487e-05
	FALSE	High	LLTSWEDLLKESPSIK		8.97036e-05	0	3	56	1	A0A0P6GLG4; E9G583; A0A0P6ALQ8	1	1859.02	2.94	High	0	2.859e-05
	FALSE	High	KTTGPSLPLAVK		0.00828622	0	6	70	2	A0A0P5ICU5; A0A0P6GLG4; A0A0P5PVY3; E9G583; A0A0P6I5H6; A0A0P6ALQ8	1	1211.74	3.49	High	0	0.004654
	FALSE	High	YTGDDITSMIPATHR		6.00896e-05	0	6	52	2	A0A0P5ZGA6; A0A0P6GLG4; A0A0P5PVY3; E9G583; A0A0P6I5H6; A0A0P6ALQ8	0	1677.79	3.23	High	0	1.816e-05
	FALSE	High	YTGDDITSMIPATHR	1xOxidation [M9]	0.000378214	0	6	52	2	A0A0P5ZGA6; A0A0P6GLG4; A0A0P5PVY3; E9G583; A0A0P6I5H6; A0A0P6ALQ8	0	1693.79	3.67	High	0	0.0009647
	FALSE	High	LEGVEDAYVR		0.0210928	0	4	46	1	A0A0P6GLG4; E9G583; A0A0P6ALQ8; A0A0P5NAS6	0	1150.57	2.81	High	0	0.01335
	FALSE	High	LPMSQMFALK	1xOxidation [M3]	0.0146624	0	8	96	2	A0A0P5ICU5; A0A0P6GLG4; A0A0P5PVY3; E9G583; A0A0P6I5H6; A0A0P5VU45; A0A0P6ALQ8; A0A0P5NAS6	0	1181.61	2.25	High	0	0.008864
	FALSE	High	LPMSQMFAIK	2xOxidation [M3; M6]	0.0309525	0	8	96	2	A0A0P5ICU5; A0A0P6GLG4; A0A0P5PVY3; E9G583; A0A0P6I5H6; A0A0P5VU45; A0A0P6ALQ8; A0A0P5NAS6	0	1197.6	2.33	High	0	0.02062
	FALSE	High	NMVMLGGQHISWR	2xOxidation [M2; M4]	0.00103193	0	5	59	2	A0A0P6GLG4; A0A0P5PVY3; A0A0P6I5H6; A0A0P6ALQ8; A0A0P5NAS6	0	1560.74	3.77	High	0	0.0005016
	FALSE	High	SQHCGLCGDYNGQFSR	2xCarbamidomethyl [C4; C7]; 1xDeamidated [N11]	0.000323878	0	5	52	2	A0A0P5ZGA6; A0A0P6GLG4; A0A0P5PVY3; A0A0P6I5H6; A0A0P6ALQ8	0	1886.75	3.94	High	0	0.000121
	FALSE	High	TQVKPAEAIEIK		0.000290808	0	4	84	4	A0A0P6CV29; A0A0P6GLG4; A0A0P6I5H6; A0A0P6ALQ8	0	1326.76	3.48	High	0	0.000107
	FALSE	High	SSGPIAKPISASGLTK		2.54343e-06	0	3	45	1	A0A0P6GLG4; E9G583; A0A0P6ALQ8	0	1513.86	4.33	High	0	5.181e-07
	FALSE	High	GAIALAFGHLIGITCSANR	1xCarbamidomethyl [C15]	0.000559749	0	2	49	1	A0A0P6GLG4; A0A0P6ALQ8	0	1942.03	2.96	High	0	0.0002238
	FALSE	High	MGHNSFGATNCAGK	1xCarbamidomethyl [C11]; 1xDeamidated [N4]; 1xOxidation [M1]	0.0851047	0.000973478	2	46	1	A0A0P6GLG4; A0A0P6ALQ8	0	1468.59	1.41	High	0.0007147	0.06472
	FALSE	High	APLLISGR		0.0803286	0.000973478	5	54	2	A0A0P6GLG4; E9G583; A0A0P4X6K5; A0A0P6I5H6; A0A0P6ALQ8	0	826.515	2.52	High	0.0007147	0.0605
	FALSE	High	NLFNEILPTTGTNPAALMVK	1xOxidation [M18]	0.111904	0.0018991	2	31	1	A0A0P6GLG4; A0A0P6ALQ8	0	2160.14	2	High	0.001394	0.08818
	FALSE	High	NVANDEELK		0.0986482	0.0018991	2	37	1	A0A0P6GLG4; A0A0P6ALQ8	0	1031.5	1.12	High	0.001394	0.07619
	FALSE	High	NTYPYDRCDLDR	1xCarbamidomethyl [C8]	0.115584	0.00283597	6	103	1	A0A0P6GLG4; A0A0P5PVY3; E9G583; A0A0P6I5H6; A0A0P6ALQ8; A0A0P5NAS6	1	1587.69	2.22	High	0.002777	0.09146
	FALSE	High	NTNLIPAIER		0.142917	0.00358207	6	56	1	A0A0P6GLG4; A0A0P5K2V7; E9G583; A0A0P4X6K5; A0A0P6ALQ8; A0A0P5NAS6	0	1140.64	2.36	High	0.00329	0.1161
	FALSE	High	DFKLDTLK		0.156507	0.00444016	5	52	1	A0A0P6GLG4; E9G583; A0A0P4X6K5; A0A0P6ALQ8; A0A0P5NAS6	1	979.546	2.28	High	0.003911	0.1289
	FALSE	High	CDLDRTDAGR	1xCarbamidomethyl [C1]	0.212274	0.00932965	5	63	1	A0A0P6GLG4; A0A0P5PVY3; A0A0P6I5H6; A0A0P6ALQ8; A0A0P5NAS6	1	1178.52	1.16	High	0.007458	0.182
FALSE	High	Master Protein	A0A0P5NG35	Putative Copper-zinc cu-zn superoxide dismutase (Fragment) OS=Daphnia magna PE=4 SV=1	0	287.147	48.9907	63	108	11	1	1288	144.2	6.89	294.64	63
	Checked	Confidence	Sequence	Modifications	Qvality PEP	Qvality q-value	# Protein Groups	# Proteins	# PSMs	Master Protein Accessions	# Missed Cleavages	Theo. MH+ [Da]	XCorr Sequest HT	Confidence Sequest HT	Percolator q-Value Sequest HT	Percolator PEP Sequest HT
	FALSE	High	LMLEQASINSPVK		0.000589447	0	1	18	1	A0A0P5NG35	0	1429.77	2.97	High	0	0.0002377
	FALSE	High	VETVAIGKEEPLWIVNFK		1.6249e-06	0	7	120	2	A0A0P5Z193; A0A0P5BM18; A0A0P4YK27; A0A0P5LYR5; A0A0P5ECS0; A0A0N8AKQ7; A0A0P5NG35	1	2072.14	6.5	High	0	3.134e-07
	FALSE	High	IQTTWETLGDKLR		0.00029714	0	15	156	4	A0A0P5Z193; A0A0P5BM18; A0A0P4YK27; A0A0P5GUJ5; A0A0P5I5B7; A0A0P5PPT4; A0A0P5PJQ0; A0A0P5XGU4; A0A0P6FTA8; A0A0P5ECS0; A0A0N8AKQ7; A0A0P5KLT7; A0A0P5NG35; A0A0P5NEQ8; A0A0N8DYK4	1	1560.84	3.5	High	0	0.0001097
	FALSE	High	KEIVGTLLMPIFFNK	1xOxidation [M9]	1.70782e-05	0	22	169	2	A0A0P5Z193; E9HZI6; A0A0P5BM18; A0A0P5S327; A0A0P6FZL4; A0A0P4YK27; A0A0P5IAS3; A0A0P5GUJ5; A0A0P5I5B7; A0A0P5LYR5; A0A0P5PJQ0; A0A0P5XGU4; A0A0P6FTA8; A0A0P5ECS0; A0A0N8AKQ7; A0A0P5KLT7; A0A0P5UT23; A0A0P5NG35; E9GVW7; A0A0P6EEN9; A0A0P5NEQ8; A0A0N8DYK4	1	1765.99	4.02	High	0	4.421e-06
	FALSE	High	KEIVGTLLMPIFFNK		0.000437875	0	22	169	1	A0A0P5Z193; E9HZI6; A0A0P5BM18; A0A0P5S327; A0A0P6FZL4; A0A0P4YK27; A0A0P5IAS3; A0A0P5GUJ5; A0A0P5I5B7; A0A0P5LYR5; A0A0P5PJQ0; A0A0P5XGU4; A0A0P6FTA8; A0A0P5ECS0; A0A0N8AKQ7; A0A0P5KLT7; A0A0P5UT23; A0A0P5NG35; E9GVW7; A0A0P6EEN9; A0A0P5NEQ8; A0A0N8DYK4	1	1750	2.73	High	0	0.0001698
	FALSE	High	ILSGEQSWENVR		0.00137123	0	1	22	1	A0A0P5NG35	0	1417.71	3.4	High	0	0.0006154
	FALSE	High	LPVEVVEAEPK		0.000783288	0	8	131	2	A0A0P5Z193; A0A0P5BM18; A0A0N8DZB7; A0A0P5I5B7; A0A0P5LYR5; A0A0P5ECS0; A0A0N8AKQ7; A0A0P5NG35	0	1209.67	3.23	High	0	0.000327
	FALSE	High	NINSPMVLEVKPDILKK		0.000902938	0	4	45	1	A0A0P5I5B7; A0A0P5LYR5; A0A0P5KLT7; A0A0P5NG35	1	1938.11	3.95	High	0	0.0003839
	FALSE	High	NINSPMVLEVKPDILKK	1xOxidation [M6]	1.10739e-06	0	4	45	2	A0A0P5I5B7; A0A0P5LYR5; A0A0P5KLT7; A0A0P5NG35	1	1954.1	5.14	High	0	2.028e-07
	FALSE	High	IQTTWETLGDK		0.00864996	0	15	156	2	A0A0P5Z193; A0A0P5BM18; A0A0P4YK27; A0A0P5GUJ5; A0A0P5I5B7; A0A0P5PPT4; A0A0P5PJQ0; A0A0P5XGU4; A0A0P6FTA8; A0A0P5ECS0; A0A0N8AKQ7; A0A0P5KLT7; A0A0P5NG35; A0A0P5NEQ8; A0A0N8DYK4	0	1291.65	2.58	High	0	0.004898
	FALSE	High	VETVAIGKEEPLWIVNFKR		1.07193e-07	0	7	120	2	A0A0P5Z193; A0A0P5BM18; A0A0P4YK27; A0A0P5LYR5; A0A0P5ECS0; A0A0N8AKQ7; A0A0P5NG35	2	2228.24	5.87	High	0	1.464e-08
	FALSE	High	EEPLWIVNFKR		0.00737852	0	9	123	1	A0A0P5Z193; E9HZI6; A0A0P5BM18; A0A0P4YK27; A0A0P5LYR5; A0A0P5ECS0; A0A0N8AKQ7; A0A0P5NG35; E9GVW7	1	1430.78	2.3	High	0	0.004085
	FALSE	High	ILPIFNYNSNQGLR		0.00190223	0	2	25	1	A0A0P5I5B7; A0A0P5NG35	0	1648.88	2.92	High	0	0.0008875
	FALSE	High	ILPIFNYNSNQGLR	1xDeamidated [N]	0.00208228	0	2	25	2	A0A0P5I5B7; A0A0P5NG35	0	1649.86	2.62	High	0	0.0009838
	FALSE	High	SVLNQVLVVHALPDDLSLVNKK		2.19686e-06	0	1	22	1	A0A0P5NG35	1	2401.38	4.92	High	0	4.398e-07
	FALSE	High	AIFALSNLAVEK		0.00327245	0	5	41	1	A0A0P5S327; A0A0P5I5B7; A0A0P5KLT7; A0A0P5NG35; A0A0P6EEN9	0	1275.73	3.15	High	0	0.001635
	FALSE	High	FVSGKVETVAIGKEEPLWIVNFK	1xDeamidated [N21]	0.0384285	0	7	119	1	A0A0P5Z193; A0A0P5BM18; A0A0P4YK27; A0A0P5LYR5; A0A0P5ECS0; A0A0N8AKQ7; A0A0P5NG35	2	2591.41	1.58	High	0	0.02627
	FALSE	High	NINSPMVLEVKPDILK	1xOxidation [M6]	0.00222121	0	4	45	1	A0A0P5I5B7; A0A0P5LYR5; A0A0P5KLT7; A0A0P5NG35	0	1826.01	3.05	High	0	0.001059
	FALSE	High	AIFALSNLAVEKK		0.000509135	0	5	41	2	A0A0P5S327; A0A0P5I5B7; A0A0P5KLT7; A0A0P5NG35; A0A0P6EEN9	1	1403.83	3.94	High	0	0.001608
	FALSE	High	ISSDVHIYQTLAYSYDDDYK		0.000351504	0	9	125	1	A0A0P5Z193; A0A0P5BM18; A0A0P5F867; A0A0N8DZB7; A0A0P5I5B7; A0A0P5LYR5; A0A0P5ECS0; A0A0N8AKQ7; A0A0P5NG35	0	2396.09	3.68	High	0	0.000133
	FALSE	High	LLPAPELCQNFPVYEIVK	1xCarbamidomethyl [C8]	0.000149784	0	11	132	2	A0A0P5Z193; E9HZI6; A0A0P5BM18; A0A0N8DZB7; A0A0P4YK27; A0A0P5I5B7; A0A0P5LYR5; A0A0P5ECS0; A0A0N8AKQ7; A0A0P5NG35; E9GVW7	0	2130.13	3.57	High	0	5.079e-05
	FALSE	High	LTLETAAPTRK		0.00626649	0	2	21	2	A0A0P5Z193; A0A0P5NG35	1	1200.69	2.99	High	0	0.003399
	FALSE	High	YTSDKINMLR		0.0325714	0	5	50	2	A0A0P4YK27; A0A0P5I5B7; A0A0P5LYR5; A0A0P5KLT7; A0A0P5NG35	1	1240.64	2.79	High	0	0.02176
	FALSE	High	IHEELKIEAR		0.00358203	0	19	168	2	E9HZI6; A0A0P5BM18; A0A0P5S327; A0A0P4YK27; A0A0P5GUJ5; A0A0P5I5B7; A0A0P5PPT4; A0A0P5PJQ0; A0A0P5XGU4; A0A0P6FTA8; A0A0P5ECS0; A0A0N8AKQ7; A0A0P5KLT7; A0A0P5UT23; A0A0P5NG35; E9GVW7; A0A0P6EEN9; A0A0P5NEQ8; A0A0N8DYK4	1	1237.69	3.92	High	0	0.00455
	FALSE	High	YSEVDPGQEVR		0.00347572	0	10	122	2	A0A0P5Z193; E9HZI6; A0A0P5BM18; A0A0N8DZB7; A0A0P4YK27; A0A0P5LYR5; A0A0P5ECS0; A0A0N8AKQ7; A0A0P5NG35; E9GVW7	0	1278.6	3.19	High	0	0.001754
	FALSE	High	QWAAALPGR		0.0566243	0	6	46	1	A0A0P5I5B7; A0A0P5PPT4; A0A0P5XGU4; A0A0N8AKQ7; A0A0P5KLT7; A0A0P5NG35	0	969.526	2.65	High	0	0.04066
	FALSE	High	QFNEDVMEK		0.0663698	0	9	97	1	A0A0P5Z193; E9HZI6; A0A0N8DZB7; A0A0P4YK27; A0A0P5LYR5; A0A0N8AKQ7; A0A0P5J4J3; A0A0P5NG35; E9GVW7	0	1139.5	1.97	High	0	0.04877
	FALSE	High	GKQFNEDVMEK		0.00416434	0	9	97	1	A0A0P5Z193; E9HZI6; A0A0N8DZB7; A0A0P4YK27; A0A0P5LYR5; A0A0N8AKQ7; A0A0P5J4J3; A0A0P5NG35; E9GVW7	1	1324.62	3.35	High	0	0.002148
	FALSE	High	EIVGTLLMPIFFNK	1xOxidation [M8]	0.000105206	0	22	169	3	A0A0P5Z193; E9HZI6; A0A0P5BM18; A0A0P5S327; A0A0P6FZL4; A0A0P4YK27; A0A0P5IAS3; A0A0P5GUJ5; A0A0P5I5B7; A0A0P5LYR5; A0A0P5PJQ0; A0A0P5XGU4; A0A0P6FTA8; A0A0P5ECS0; A0A0N8AKQ7; A0A0P5KLT7; A0A0P5UT23; A0A0P5NG35; E9GVW7; A0A0P6EEN9; A0A0P5NEQ8; A0A0N8DYK4	0	1637.9	3.87	High	0	3.42e-05
	FALSE	High	EIVGTLLMPIFFNK		0.00626649	0	22	169	2	A0A0P5Z193; E9HZI6; A0A0P5BM18; A0A0P5S327; A0A0P6FZL4; A0A0P4YK27; A0A0P5IAS3; A0A0P5GUJ5; A0A0P5I5B7; A0A0P5LYR5; A0A0P5PJQ0; A0A0P5XGU4; A0A0P6FTA8; A0A0P5ECS0; A0A0N8AKQ7; A0A0P5KLT7; A0A0P5UT23; A0A0P5NG35; E9GVW7; A0A0P6EEN9; A0A0P5NEQ8; A0A0N8DYK4	0	1621.9	1.87	High	0	0.003393
	FALSE	High	LTIEPVDESTAVVALLATK		1.12664e-06	0	7	94	2	A0A0P5Z193; A0A0P4YK27; A0A0P5LYR5; A0A0P5ECS0; A0A0N8AKQ7; A0A0P5J4J3; A0A0P5NG35	0	1970.11	4.79	High	0	4.956e-06
	FALSE	High	LAALTLLFVSNPPQAFWSR		0.0037557	0	19	158	1	A0A0P5Z193; E9HZI6; A0A0P5BM18; A0A0P5S327; A0A0P6FZL4; A0A0P4YK27; A0A0P5GUJ5; A0A0P5I5B7; A0A0P5PJQ0; A0A0P5XGU4; A0A0P6FTA8; A0A0P5ECS0; A0A0N8AKQ7; A0A0P5KLT7; A0A0P5UT23; A0A0P5NG35; E9GVW7; A0A0P6EEN9; A0A0P5NEQ8	0	2131.17	2.48	High	0	0.001914
	FALSE	High	ATGQPELYIYLNFLDNYQR		7.26318e-05	0	21	168	1	A0A0P5Z193; E9HZI6; A0A0P5XPE2; A0A0P5BM18; A0A0P5S327; A0A0P4YK27; A0A0P5IAS3; A0A0P5GUJ5; A0A0P5I5B7; A0A0P5PPT4; A0A0P5PJQ0; A0A0P5XGU4; A0A0P5ECS0; A0A0N8AKQ7; A0A0P5KLT7; A0A0P5UT23; A0A0P5NG35; E9GVW7; A0A0P6EEN9; A0A0P5NEQ8; A0A0N8DYK4	0	2318.15	2.83	High	0	2.246e-05
	FALSE	High	IAGEQAVQAIAALVPIVQTPTK		2.87637e-05	0	5	43	2	A0A0P5F867; A0A0P5I5B7; A0A0P5LYR5; A0A0P5KLT7; A0A0P5NG35	0	2218.28	3.49	High	0	7.939e-06
	FALSE	High	LLSEIISDVESEAYYVDPSSK		0.00014914	0	5	48	1	A0A0P4YK27; A0A0P5I5B7; A0A0P5LYR5; A0A0P5KLT7; A0A0P5NG35	0	2344.14	2.49	High	0	5.054e-05
	FALSE	High	LVMGEFCNPSDSIVASQLVPYLAEQAK	1xCarbamidomethyl [C7]; 1xOxidation [M3]	4.74122e-05	0	13	136	1	E9HZI6; A0A0P5BM18; A0A0P5I5B7; A0A0P5RAR4; A0A0P5PJQ0; A0A0P6FTA8; A0A0P5ECS0; A0A0N8AKQ7; A0A0P5KLT7; A0A0P5UT23; A0A0P5NG35; A0A0P6EEN9; A0A0P5NEQ8	0	2982.46	4.82	High	0	1.393e-05
	FALSE	High	CNLVNGAGCENK	2xCarbamidomethyl [C1; C9]	0.000721732	0	9	126	2	E9HZI6; A0A0P5BM18; A0A0N8DZB7; A0A0P5I5B7; A0A0P5LYR5; A0A0P5ECS0; A0A0N8AKQ7; A0A0P5NG35; E9GVW7	0	1335.58	3.23	High	0	0.000299
	FALSE	High	CNLVNGAGCENK	2xCarbamidomethyl [C1; C9]; 1xDeamidated [N5]	0.0153042	0	9	126	1	E9HZI6; A0A0P5BM18; A0A0N8DZB7; A0A0P5I5B7; A0A0P5LYR5; A0A0P5ECS0; A0A0N8AKQ7; A0A0P5NG35; E9GVW7	0	1336.56	1.83	High	0	0.009289
	FALSE	High	VANKNPLNREETVR		0.00482037	0	18	159	2	A0A0P5BM18; A0A0P5S327; A0A0P6FZL4; A0A0P4YK27; A0A0P5IAS3; A0A0P5GUJ5; A0A0P5I5B7; A0A0P5PJQ0; A0A0P5XGU4; A0A0P6FTA8; A0A0P5ECS0; A0A0N8AKQ7; A0A0P5KLT7; A0A0P5UT23; A0A0P5NG35; A0A0P6EEN9; A0A0P5NEQ8; A0A0N8DYK4	2	1639.89	2.96	High	0	0.002533
	FALSE	High	VANKNPLNREETVR	1xDeamidated [N]	0.0275941	0	18	159	2	A0A0P5BM18; A0A0P5S327; A0A0P6FZL4; A0A0P4YK27; A0A0P5IAS3; A0A0P5GUJ5; A0A0P5I5B7; A0A0P5PJQ0; A0A0P5XGU4; A0A0P6FTA8; A0A0P5ECS0; A0A0N8AKQ7; A0A0P5KLT7; A0A0P5UT23; A0A0P5NG35; A0A0P6EEN9; A0A0P5NEQ8; A0A0N8DYK4	2	1640.87	2.08	High	0	0.01806
	FALSE	High	GVIYGLEPGLHGIHAHTGK		0.000872352	0	1	22	2	A0A0P5NG35	0	1956.05	3.13	High	0	0.00037
	FALSE	High	IIDQEHLEKPFQVK		2.09114e-05	0	9	122	4	E9HZI6; A0A0P5BM18; A0A0N8DZB7; A0A0P4YK27; A0A0P5LYR5; A0A0P5ECS0; A0A0N8AKQ7; A0A0P5NG35; E9GVW7	0	1723.94	3.97	High	0	5.542e-06
	FALSE	High	GKQFNEDVMEKYSEVDPGQEVR	1xOxidation [M9]	0.00273117	0	8	94	1	A0A0P5Z193; E9HZI6; A0A0N8DZB7; A0A0P4YK27; A0A0P5LYR5; A0A0N8AKQ7; A0A0P5NG35; E9GVW7	2	2600.19	3.06	High	0	0.001334
	FALSE	High	IIGCTSNEGHFIVQR	1xCarbamidomethyl [C4]	1.19668e-06	0	9	122	2	A0A0P5Z193; A0A0P5BM18; A0A0N8DZB7; A0A0P4YK27; A0A0P5I5B7; A0A0P5LYR5; A0A0P5ECS0; A0A0N8AKQ7; A0A0P5NG35	0	1730.86	4.84	High	0	2.218e-07
	FALSE	High	AESEDWEDEALCNLVR	1xCarbamidomethyl [C12]	1.02918e-06	0	16	156	1	A0A0P5Z193; A0A0P5BM18; A0A0P4YK27; A0A0P5IAS3; A0A0P5I5B7; A0A0P5LYR5; A0A0P5PJQ0; A0A0P5XGU4; A0A0P6FTA8; A0A0P5ECS0; A0A0N8AKQ7; A0A0P5KLT7; A0A0P5UT23; A0A0P5NG35; A0A0P5NEQ8; A0A0N8DYK4	0	1935.84	4.34	High	0	1.871e-07
	FALSE	High	VPSNLNLEGVERPSNVDR		0.020559	0	1	17	1	A0A0P5NG35	0	1995.03	3.12	High	0	0.01296
	FALSE	High	QFNEDVMEKYSEVDPGQEVR	1xOxidation [M7]	0.00975524	0	8	94	1	A0A0P5Z193; E9HZI6; A0A0N8DZB7; A0A0P4YK27; A0A0P5LYR5; A0A0N8AKQ7; A0A0P5NG35; E9GVW7	1	2415.08	3.04	High	0	0.005604
	FALSE	High	ALVTIQGTGDVNGK		0.000498286	0	1	18	1	A0A0P5NG35	0	1372.74	3.09	High	0	0.0001962
	FALSE	High	ALVTIQGTGDVNGK	1xDeamidated [N12]	0.00140109	0	1	18	1	A0A0P5NG35	0	1373.73	3.09	High	0	0.0006308
	FALSE	High	RALVTIQGTGDVNGK	1xDeamidated [N13]	0.0136908	0	1	18	2	A0A0P5NG35	1	1529.83	3.09	High	0	0.04465
	FALSE	High	SVLNQVLVVHALPDDLSLVNK		0.00211845	0	1	22	1	A0A0P5NG35	0	2273.29	2.3	High	0	0.001001
	FALSE	High	FVSGKVETVAIGK		0.0533949	0	8	126	1	A0A0P5Z193; A0A0P5BM18; A0A0N8DZB7; A0A0P4YK27; A0A0P5LYR5; A0A0P5ECS0; A0A0N8AKQ7; A0A0P5NG35	1	1334.77	1.9	High	0	0.03817
	FALSE	High	FFTINPNTIFR		0.00643025	0	19	164	3	A0A0P5XPE2; A0A0P5BM18; A0A0P5S327; A0A0P4YK27; A0A0P5IAS3; A0A0P5I5B7; A0A0P5PPT4; A0A0P5PJQ0; A0A0P5XGU4; A0A0P6FTA8; A0A0P5ECS0; A0A0N8AKQ7; A0A0P5R4V4; A0A0P5KLT7; A0A0P5UT23; A0A0P5NG35; A0A0P6EEN9; A0A0P5NEQ8; A0A0N8DYK4	0	1369.73	2.68	High	0	0.004597
	FALSE	High	IEGALKPVVVSK		0.000210513	0	13	162	6	A0A0P5XPE2; A0A0P5BM18; A0A0P5I5B7; A0A0P5PPT4; A0A0P5XGU4; A0A0P6FTA8; A0A0P5ECS0; A0A0N8AKQ7; A0A0P5KLT7; A0A0P5NG35; A0A0P5NEQ8; A0A0N8BQS0; A0A0N8DYK4	0	1239.77	3.92	High	0	7.445e-05
	FALSE	High	ETILLGLETPFK		0.00148817	0	1	22	1	A0A0P5NG35	0	1360.77	2.47	High	0	0.0006751
	FALSE	High	SLGIQCENVGER	1xCarbamidomethyl [C6]	0.00330074	0	1	22	1	A0A0P5NG35	0	1361.65	2.91	High	0	0.001654
	FALSE	High	GRLTIEPVDESTAVVALLATK		9.04799e-05	0	6	92	2	A0A0P5Z193; A0A0P4YK27; A0A0P5LYR5; A0A0P5ECS0; A0A0P5J4J3; A0A0P5NG35	1	2183.23	4.52	High	0	2.882e-05
	FALSE	High	EEPLWIVNFK		0.0103152	0	9	124	1	A0A0P5Z193; E9HZI6; A0A0P5BM18; A0A0P4YK27; A0A0P5LYR5; A0A0P5ECS0; A0A0N8AKQ7; A0A0P5NG35; E9GVW7	0	1274.68	2.1	High	0	0.005951
	FALSE	High	LMEISIDSK		0.0556828	0	17	161	1	A0A0P5Z193; A0A0P5XPE2; A0A0P5BM18; A0A0P5S327; A0A0P5GUJ5; A0A0P5I5B7; A0A0P5PPT4; A0A0P5PJQ0; A0A0P5XGU4; A0A0P6FTA8; A0A0P5ECS0; A0A0N8AKQ7; A0A0P5KLT7; A0A0P5UT23; A0A0P5NG35; A0A0P6EEN9; A0A0P5NEQ8	0	1035.54	2.39	High	0	0.03997
	FALSE	High	LMEISIDSK	1xOxidation [M2]	0.0476639	0	17	161	1	A0A0P5Z193; A0A0P5XPE2; A0A0P5BM18; A0A0P5S327; A0A0P5GUJ5; A0A0P5I5B7; A0A0P5PPT4; A0A0P5PJQ0; A0A0P5XGU4; A0A0P6FTA8; A0A0P5ECS0; A0A0N8AKQ7; A0A0P5KLT7; A0A0P5UT23; A0A0P5NG35; A0A0P6EEN9; A0A0P5NEQ8	0	1051.53	2.43	High	0	0.03344
	FALSE	High	ITTALSLSR		0.0858086	0.000973478	17	144	1	A0A0P5Z193; E9HZI6; A0A0P5BM18; A0A0P5F867; A0A0P5S327; A0A0P4YK27; A0A0P5I5B7; A0A0P5LYR5; A0A0P5PJQ0; A0A0P5ECS0; A0A0N8AKQ7; A0A0P5KLT7; A0A0P5NG35; E9GVW7; A0A0P6EEN9; A0A0P5NEQ8; A0A0N8DYK4	0	961.568	2.48	High	0.0007147	0.06514
	FALSE	High	LTLETAAPTR		0.0780372	0.000973478	2	21	1	A0A0P5Z193; A0A0P5NG35	0	1072.6	2.88	High	0.0007147	0.05846
	FALSE	High	VETVAIGK		0.135175	0.00358207	8	127	1	A0A0P5Z193; A0A0P5BM18; A0A0N8DZB7; A0A0P4YK27; A0A0P5LYR5; A0A0P5ECS0; A0A0N8AKQ7; A0A0P5NG35	0	816.483	2	High	0.00329	0.1092
	FALSE	High	YTSDKINMLR	1xOxidation [M8]	0.123282	0.00358207	5	50	2	A0A0P4YK27; A0A0P5I5B7; A0A0P5LYR5; A0A0P5KLT7; A0A0P5NG35	1	1256.63	2.34	High	0.00329	0.0984
	FALSE	High	FAIEGDMK		0.149869	0.00358207	16	149	2	A0A0P5Z193; A0A0P5XPE2; A0A0P5BM18; A0A0P4YK27; A0A0P5GUJ5; A0A0P5I5B7; A0A0P5PPT4; A0A0P6FTA8; A0A0P5ECS0; A0A0N8AKQ7; A0A0P5KLT7; A0A0P5UT23; A0A0P5NG35; A0A0P5NEQ8; A0A0N8BQS0; A0A0N8DYK4	0	910.434	2.01	High	0.00329	0.1224
	FALSE	High	QFNEDVMEK	1xOxidation [M7]	0.120342	0.00358207	9	97	1	A0A0P5Z193; E9HZI6; A0A0N8DZB7; A0A0P4YK27; A0A0P5LYR5; A0A0N8AKQ7; A0A0P5J4J3; A0A0P5NG35; E9GVW7	0	1155.5	2.41	High	0.00329	0.09584
	FALSE	High	ENAGKLDINFHK		0.121804	0.00358207	8	53	1	A0A0P5IAS3; A0A0P5I5B7; A0A0P5PPT4; A0A0P5XGU4; A0A0N8AKQ7; A0A0P5R4V4; A0A0P5KLT7; A0A0P5NG35	1	1385.72	2.02	High	0.00329	0.097
	FALSE	High	GKQFNEDVMEK	1xOxidation [M9]	0.122295	0.00358207	9	97	1	A0A0P5Z193; E9HZI6; A0A0N8DZB7; A0A0P4YK27; A0A0P5LYR5; A0A0N8AKQ7; A0A0P5J4J3; A0A0P5NG35; E9GVW7	1	1340.62	1.94	High	0.00329	0.09723
	FALSE	High	LMAETPFTR	1xOxidation [M2]	0.125783	0.00358207	6	50	1	A0A0P5I5B7; A0A0P5PPT4; A0A0P5XGU4; A0A0N8AKQ7; A0A0P5KLT7; A0A0P5NG35	0	1081.53	2.12	High	0.00329	0.1008
	FALSE	High	VPSNLNLEGVERPSNVDRLTLETAAPTRK	2xDeamidated [N6; N]	0.146356	0.00358207	1	17	2	A0A0P5NG35	2	3178.67	1.79	High	0.00329	0.1195
	FALSE	High	SATPTGYSK		0.141787	0.00358207	11	127	1	A0A0P5Z193; E9HZI6; A0A0P5BM18; A0A0P5F867; A0A0N8DZB7; A0A0P5I5B7; A0A0P5LYR5; A0A0P5ECS0; A0A0N8AKQ7; A0A0P5NG35; E9GVW7	0	911.447	1.56	High	0.00329	0.1154
	FALSE	High	EIVGTLLMPIFFNKAEETEVR	1xOxidation [M8]	0.162767	0.00527855	21	163	1	A0A0P5Z193; E9HZI6; A0A0P5BM18; A0A0P6FZL4; A0A0P4YK27; A0A0P5IAS3; A0A0P5GUJ5; A0A0P5I5B7; A0A0P5LYR5; A0A0P5PJQ0; A0A0P5XGU4; A0A0P6FTA8; A0A0P5ECS0; A0A0N8AKQ7; A0A0P5KLT7; A0A0P5UT23; A0A0P5NG35; E9GVW7; A0A0P6EEN9; A0A0P5NEQ8; A0A0N8DYK4	1	2452.28	1.46	High	0.004515	0.1346
	FALSE	High	LVGKPGLR		0.185741	0.00607653	19	162	1	A0A0P5Z193; E9HZI6; A0A0P5BM18; A0A0P5S327; A0A0P5GUJ5; A0A0P5I5B7; A0A0P5PPT4; A0A0P5PJQ0; A0A0P5XGU4; A0A0P6FTA8; A0A0P5ECS0; A0A0N8AKQ7; A0A0P5KLT7; A0A0P5UT23; A0A0P5NG35; E9GVW7; A0A0P6EEN9; A0A0P5NEQ8; A0A0N8DYK4	0	839.546	1.78	High	0.005091	0.1564
	FALSE	High	ISHSDTVR		0.202835	0.00767163	9	128	1	A0A0P5Z193; A0A0P5BM18; A0A0N8DZB7; A0A0P4YK27; A0A0P5I5B7; A0A0P5LYR5; A0A0P5ECS0; A0A0N8AKQ7; A0A0P5NG35	0	914.469	1.1	High	0.006261	0.1731
FALSE	High	Master Protein	A0A0P6B5M1	Vitellogenin-1 OS=Daphnia magna PE=4 SV=1	0	285.08	41.6618	62	100	1	1	1709	191.9	7.34	276.5	62
	Checked	Confidence	Sequence	Modifications	Qvality PEP	Qvality q-value	# Protein Groups	# Proteins	# PSMs	Master Protein Accessions	# Missed Cleavages	Theo. MH+ [Da]	XCorr Sequest HT	Confidence Sequest HT	Percolator q-Value Sequest HT	Percolator PEP Sequest HT
	FALSE	High	SDVSAELSWK		0.0233684	0	5	133	1	A0A0P5VX15; A0A0N8E8E6; A0A0P5Z4G7; A0A0P5EKW5; A0A0P6B5M1	0	1121.55	2.34	High	0	0.01495
	FALSE	High	SVSTYFQYQYATK		0.00110081	0	4	147	1	A0A0P5VX15; A0A0N8E8E6; A0A0P5EKW5; A0A0P6B5M1	0	1585.75	3.24	High	0	0.0004808
	FALSE	High	LPLSQVYITDAFK		2.31894e-05	0	2	11	1	A0A0P6B5M1; A0A0P5ZZ90	0	1494.82	4.02	High	0	6.218e-06
	FALSE	High	AGLLHINLMGSVNR		0.00213678	0	4	98	1	A0A0N8E8E6; A0A0P5Z4G7; A0A0P5EKW5; A0A0P6B5M1	0	1494.82	3.93	High	0	0.001012
	FALSE	High	IHPLLVNLASNTAER		0.000199906	0	4	78	4	A0A0N8E8E6; A0A0P5Z4G7; A0A0P5EKW5; A0A0P6B5M1	0	1647.92	4.24	High	0	0.0001079
	FALSE	High	NVADSVKPTLEDQATNLISVTNKPIKR		3.97352e-05	0	2	114	1	A0A0N8E8E6; A0A0P6B5M1	1	2951.62	5.33	High	0	1.142e-05
	FALSE	High	TCGVCGDFNQEVAGEFK	2xCarbamidomethyl [C2; C5]	2.22544e-06	0	2	95	2	A0A0P5EKW5; A0A0P6B5M1	0	1917.81	3.98	High	0	4.445e-07
	FALSE	High	VIVQSIDENTIVVK		0.000950839	0	3	44	4	A0A0P5AHV2; A0A0P5EKW5; A0A0P6B5M1	0	1556.89	3.85	High	0	0.0004071
	FALSE	High	GIWEELNATPRPADK		0.0647304	0	3	97	1	A0A0N8E8E6; A0A0P5EKW5; A0A0P6B5M1	0	1696.87	1.37	High	0	0.04731
	FALSE	High	TCGVCGDFNQEVAGEFKTPQR	2xCarbamidomethyl [C2; C5]	0.00129657	0	2	91	1	A0A0P5EKW5; A0A0P6B5M1	1	2400.07	3.63	High	0	0.000576
	FALSE	High	GIWEELNATPRPADKR		0.0222967	0	3	97	2	A0A0N8E8E6; A0A0P5EKW5; A0A0P6B5M1	1	1852.97	2.66	High	0	0.02224
	FALSE	High	RDGIFNYESVPAEEETK		0.000246892	0	4	46	1	A0A0P5Z4G7; A0A0P5EKW5; A0A0P6B5M1; A0A0P5ZZ90	1	1983.93	4.15	High	0	8.902e-05
	FALSE	High	GGIKSDVSAELSWK		0.0037557	0	5	124	1	A0A0P5VX15; A0A0N8E8E6; A0A0P5Z4G7; A0A0P5EKW5; A0A0P6B5M1	1	1476.77	2.48	High	0	0.001914
	FALSE	High	CAVSEGELMAASFK	1xCarbamidomethyl [C1]; 1xOxidation [M9]	8.44529e-05	0	2	110	2	A0A0P5EKW5; A0A0P6B5M1	0	1515.68	3.02	High	0	2.666e-05
	FALSE	High	DVLYLTEEDQIAFGEQCDQSK	1xCarbamidomethyl [C17]	5.11137e-06	0	4	120	2	A0A0P5VX15; A0A0N8E8E6; A0A0P5EKW5; A0A0P6B5M1	0	2488.12	2.97	High	0	1.137e-06
	FALSE	High	CAVSEGELMAASFK	1xCarbamidomethyl [C1]	6.69232e-05	0	2	110	1	A0A0P5EKW5; A0A0P6B5M1	0	1499.69	3.56	High	0	2.058e-05
	FALSE	High	VTDLLYYHVKPYTVTR		2.46312e-05	0	4	124	2	A0A0P5VX15; A0A0N8E8E6; A0A0P5EKW5; A0A0P6B5M1	0	1968.06	4.61	High	0	1.821e-05
	FALSE	High	ELNFNYNLNNHQIK	1xDeamidated [N7]	0.000146592	0	2	53	2	A0A0P5VX15; A0A0P6B5M1	0	1761.86	3.81	High	0	0.0006483
	FALSE	High	QQYAVIELQSR		0.00385394	0	4	47	1	A0A0P5AHV2; A0A0P5Z4G7; A0A0P5EKW5; A0A0P6B5M1	0	1334.71	3.05	High	0	0.001961
	FALSE	High	LEESIPSLISEAMK	1xOxidation [M13]	0.0113853	0	3	93	1	A0A0N8E8E6; A0A0P5EKW5; A0A0P6B5M1	0	1562.8	2.15	High	0	0.006672
	FALSE	High	FLATLPILVSMQGNMKGDGK	2xOxidation [M11; M15]	0.000290808	0	4	117	1	A0A0N8E8E6; A0A0P5Z4G7; A0A0P5EKW5; A0A0P6B5M1	1	2152.11	2.86	High	0	0.0001074
	FALSE	High	LVTVIYGKDTVELDPTGYVTINGDKK		0.000868602	0	3	101	2	A0A0N8DDX1; A0A0P5EKW5; A0A0P6B5M1	2	2838.51	3.33	High	0	0.000368
	FALSE	High	FSPLTFAYSK		0.0258863	0	4	160	1	A0A0N8DDX1; A0A0N8E8E6; A0A0P5EKW5; A0A0P6B5M1	0	1160.6	2.27	High	0	0.01678
	FALSE	High	VAFVVPEKIHPILVNLASNTAER		0.000415813	0	4	77	2	A0A0N8E8E6; A0A0P5Z4G7; A0A0P5EKW5; A0A0P6B5M1	1	2517.42	3.58	High	0	0.00016
	FALSE	High	SIASQLQLDITGVR		5.83045e-05	0	4	46	2	A0A0P5Z4G7; A0A0P5EKW5; A0A0P6B5M1; A0A0P5ZZ90	0	1500.84	3.78	High	0	1.758e-05
	FALSE	High	VELPFNGNYIASGVDVR	1xDeamidated [N6]	0.000214172	0	4	135	4	A0A0P5VX15; A0A0N8E8E6; A0A0P5EKW5; A0A0P6B5M1	0	1850.93	3.72	High	0	7.616e-05
	FALSE	High	MAAMSLLFMSNAPQSIWQK	3xOxidation [M1; M4; M9]	0.0265566	0	4	96	1	A0A0N8E8E6; A0A0P5Z4G7; A0A0P5EKW5; A0A0P6B5M1	0	2202.04	2.06	High	0	0.01729
	FALSE	High	VELPFNGNYIASGVDVR		0.000238528	0	4	135	2	A0A0P5VX15; A0A0N8E8E6; A0A0P5EKW5; A0A0P6B5M1	0	1849.94	3.71	High	0	8.594e-05
	FALSE	High	FASSTWFEPNR		0.00700759	0	3	92	1	A0A0N8E8E6; A0A0P5EKW5; A0A0P6B5M1	0	1341.62	3.23	High	0	0.003864
	FALSE	High	MTFFQAFQK	1xOxidation [M1]	0.0296642	0	3	114	1	A0A0P5VX15; A0A0N8E8E6; A0A0P6B5M1	0	1163.56	2.84	High	0	0.01965
	FALSE	High	VLPMFSLDELK		0.0399202	0	4	85	1	A0A0P5AHV2; A0A0P5Z4G7; A0A0P5EKW5; A0A0P6B5M1	0	1291.7	2.22	High	0	0.02737
	FALSE	High	KSIASQLQLDITGVR		4.36857e-05	0	4	46	1	A0A0P5Z4G7; A0A0P5EKW5; A0A0P6B5M1; A0A0P5ZZ90	1	1628.93	3.59	High	0	1.272e-05
	FALSE	High	VLPMFSLDELK	1xOxidation [M4]	0.0236694	0	4	85	1	A0A0P5AHV2; A0A0P5Z4G7; A0A0P5EKW5; A0A0P6B5M1	0	1307.69	2	High	0	0.01521
	FALSE	High	DTVELDPTGYVTINGDKK	1xDeamidated [N14]	0.000289558	0	3	107	2	A0A0N8DDX1; A0A0P5EKW5; A0A0P6B5M1	1	1965.97	4.17	High	0	0.0001067
	FALSE	High	AVVYPHPDSLIMEIK	1xOxidation [M12]	0.0187139	0	2	100	2	A0A0P5EKW5; A0A0P6B5M1	0	1727.9	3.21	High	0	0.01167
	FALSE	High	NVADSVKPTLEDQATNLISVTNKPIK		1.77032e-08	0	2	114	2	A0A0N8E8E6; A0A0P6B5M1	0	2795.51	6.31	High	0	1.934e-09
	FALSE	High	SIASQLQLDITGVRR		0.0294129	0	4	46	1	A0A0P5Z4G7; A0A0P5EKW5; A0A0P6B5M1; A0A0P5ZZ90	1	1656.94	2.25	High	0	0.01941
	FALSE	High	DGIFNYESVPAEEETK		5.63292e-05	0	4	46	1	A0A0P5Z4G7; A0A0P5EKW5; A0A0P6B5M1; A0A0P5ZZ90	0	1827.83	3.57	High	0	1.692e-05
	FALSE	High	RGDETVNQWAR		2.81507e-05	0	4	160	1	A0A0N8DDX1; A0A0N8E8E6; A0A0P5EKW5; A0A0P6B5M1	1	1331.65	4.01	High	0	7.735e-06
	FALSE	High	DLKETPDSEKDNIER		2.7963e-06	0	4	77	6	A0A0P5AHV2; A0A0P5Z4G7; A0A0P5EKW5; A0A0P6B5M1	2	1788.86	4.98	High	0	4.37e-06
	FALSE	High	QTTLASIADLLNSVCGSR	1xCarbamidomethyl [C15]; 1xDeamidated [N12]	0.000589447	0	4	80	1	A0A0N8E8E6; A0A0P5Z4G7; A0A0P5EKW5; A0A0P6B5M1	0	1906.95	2.21	High	0	0.0002373
	FALSE	High	QTTLASIADLLNSVCGSR	1xCarbamidomethyl [C15]	0.000115168	0	4	80	1	A0A0N8E8E6; A0A0P5Z4G7; A0A0P5EKW5; A0A0P6B5M1	0	1905.97	3.66	High	0	3.774e-05
	FALSE	High	NLESGNAHLMK		0.0164597	0	4	133	1	A0A0P5VX15; A0A0N8E8E6; A0A0P5EKW5; A0A0P6B5M1	0	1213.6	3.28	High	0	0.01007
	FALSE	High	NLESGNAHLMK	1xDeamidated [N6]; 1xOxidation [M10]	0.0171795	0	4	133	1	A0A0P5VX15; A0A0N8E8E6; A0A0P5EKW5; A0A0P6B5M1	0	1230.58	2.53	High	0	0.01058
	FALSE	High	AAMYSPAGQQCQK	1xCarbamidomethyl [C11]	0.0200387	0	3	129	1	A0A0N8E8E6; A0A0P5EKW5; A0A0P6B5M1	0	1439.64	1.86	High	0	0.01262
	FALSE	High	AAMYSPAGQQCQK	1xCarbamidomethyl [C11]; 1xOxidation [M3]	0.0163194	0	3	129	1	A0A0N8E8E6; A0A0P5EKW5; A0A0P6B5M1	0	1455.64	1.84	High	0	0.009983
	FALSE	High	ETPDSEKDNLER		0.00334365	0	5	79	4	A0A0P5AHV2; A0A0P5PE20; A0A0P5Z4G7; A0A0P5EKW5; A0A0P6B5M1	1	1432.66	3.05	High	0	0.001679
	FALSE	High	KAGEKVENLR		0.0522854	0	3	99	1	A0A0N8E8E6; A0A0P5EKW5; A0A0P6B5M1	2	1143.65	1.87	High	0	0.03727
	FALSE	High	ELESSQSTTDR		0.0224879	0	4	82	1	A0A0N8E8E6; A0A0P5JS25; A0A0P5EKW5; A0A0P6B5M1	0	1252.57	2.06	High	0	0.01437
	FALSE	High	QSEIAVTAHQGR		0.000278545	0	3	131	2	A0A0N8DDX1; A0A0P5EKW5; A0A0P6B5M1	0	1296.67	3.51	High	0	0.0003522
	FALSE	High	KVDFAVCHTATR	1xCarbamidomethyl [C7]	9.61052e-05	0	3	131	2	A0A0N8E8E6; A0A0P5EKW5; A0A0P6B5M1	1	1404.71	3.92	High	0	3.084e-05
	FALSE	High	TCQHTVVYESGSTQSR	1xCarbamidomethyl [C2]	4.58059e-05	0	1	85	2	A0A0P6B5M1	0	1839.83	4.06	High	0	1.343e-05
	FALSE	High	TLDYPTMTLFVDCVVQSGSNPAVMLIK	1xCarbamidomethyl [C13]; 1xDeamidated [Q16]; 2xOxidation [M7; M24]	0.00220217	0	3	55	1	A0A0P5PE20; A0A0P5Z4G7; A0A0P6B5M1	0	3032.47	2.05	High	0	0.001045
	FALSE	High	LMEHSESDFSDK		0.000130495	0	4	105	2	A0A0P5VX15; A0A0N8E8E6; A0A0P5EKW5; A0A0P6B5M1	0	1424.6	3.02	High	0	0.003845
[truncated: 2,146 more rows]

## Sheet: Workbook 5 
Checked	Protein FDR Confidence	Master	Accession	Description	Exp. q-value	Sum PEP Score	Coverage	# Peptides	# PSMs	# Unique Peptides	# Protein Groups	# AAs	MW [kDa]	calc. pI	Score Sequest HT	# Peptides Sequest HT
[truncated: 209 more rows]

[truncated: 22 more sheets: Workbook 6, Workbook 7 , Workbook 8, Workbook 9, Workbook 10, Workbook 11, Workbook 12, Workbook 13, Workbook 14, Workbook 15, Workbook 16, Workbook 17, Workbook 18, Workbook 19, Workbook 20, Workbook 21, Workbook 22, Workbook 23, Workbook 24, Workbook 25 …]
