# Supplementary material for: Mechanistic insights into toxicity pathways induced by nanomaterials in Daphnia magna from analysis of the composition of the acquired protein corona
Source: Royal Society of Chemistry journal article supplement (doi:10.1039/d0en00625d), 2020-01-01
Supplement: d0en00625d3.csv [file d0en00625d3.csv]

ID	NM	Condition	Protein	Molecular GO Function	Media
1934	Aged Ag2S	Aged	116 kDa U5 small nuclear ribonucleoprotein component protein	GTP binding	Class I
1174	Aged Ag2S	Aged	116 kDa U5 small nuclear ribonucleoprotein component protein	GTP binding	Class V
534	Aged Ag2S	Aged	116 kDa U5 small nuclear ribonucleoprotein component protein	GTP binding	HH combo
535	Aged Ag2S	Aged	39S ribosomal protein	Structural constituent of ribosome	HH combo
1900	Aged Ag2S	Aged	3-hydroxyacyl-[acyl-carrier-protein] dehydratase FabZ	(3R)-hydroxymyristoyl-[acyl-carrier-protein] dehydratase activity	Class I
1964	Aged Ag2S	Aged	40S ribosomal protein	RNA binding	Class I
1967	Aged Ag2S	Aged	40S ribosomal protein	Structural constituent of ribosome	Class I
536	Aged Ag2S	Aged	40S ribosomal protein	Structural constituent of ribosome	HH combo
537	Aged Ag2S	Aged	40S ribosomal protein	RNA binding	HH combo
538	Aged Ag2S	Aged	40S ribosomal protein	Structural constituent of ribosome	HH combo
1968	Aged Ag2S	Aged	50s ribosomal protein	Structural constituent of ribosome	Class I
539	Aged Ag2S	Aged	50s ribosomal protein	Unreviewed	HH combo
1902	Aged Ag2S	Aged	60 kDa chaperonin	ATP binding	Class I
1175	Aged Ag2S	Aged	60 kDa heat shock protein	Structural constituent of cuticle	Class V
1903	Aged Ag2S	Aged	60S ribosomal protein	ATP binding	Class I
1969	Aged Ag2S	Aged	60S ribosomal protein	Structural constituent of ribosome	Class I
1970	Aged Ag2S	Aged	60S ribosomal protein	Structural constituent of ribosome	Class I
1971	Aged Ag2S	Aged	60S ribosomal protein	Structural constituent of ribosome	Class I
1176	Aged Ag2S	Aged	60S ribosomal protein	Structural constituent of ribosome	Class V
540	Aged Ag2S	Aged	60S ribosomal protein	Structural constituent of ribosome	HH combo
541	Aged Ag2S	Aged	60S ribosomal protein	Structural constituent of ribosome	HH combo
542	Aged Ag2S	Aged	60S ribosomal protein	Structural constituent of ribosome	HH combo
1904	Aged Ag2S	Aged	Actin, alpha skeletal muscle	ATP binding	Class I
1905	Aged Ag2S	Aged	Actin, alpha skeletal muscle	ATP binding	Class I
543	Aged Ag2S	Aged	Actin, alpha skeletal muscle	ATP binding	HH combo
1177	Aged Ag2S	Aged	ADP/ATP translocase	Transporter activitiy	Class V
1935	Aged Ag2S	Aged	ADP-ribosylation factor	GTP binding	Class I
544	Aged Ag2S	Aged	ADP-ribosylation factor	GTP binding	HH combo
1906	Aged Ag2S	Aged	ATP synthase subunit alpha	ATP binding	Class I
1907	Aged Ag2S	Aged	ATP synthase subunit alpha	ATP binding	Class I
1908	Aged Ag2S	Aged	ATP synthase subunit alpha	ATP binding	Class I
545	Aged Ag2S	Aged	ATP synthase subunit alpha	ATP binding	HH combo
1178	Aged Ag2S	Aged	ATP synthase subunit alpha, mitochondrial	Structural constituent of cuticle	Class V
546	Aged Ag2S	Aged	ATP synthase subunit alpha, mitochondrial	ATP binding	HH combo
1909	Aged Ag2S	Aged	ATP synthase subunit beta	ATP binding	Class I
1910	Aged Ag2S	Aged	ATP synthase subunit beta	ATP binding	Class I
1911	Aged Ag2S	Aged	ATP synthase subunit beta	ATP binding	Class I
1179	Aged Ag2S	Aged	ATP synthase subunit beta	Structural constituent of cuticle	Class V
1180	Aged Ag2S	Aged	ATP synthase subunit beta	Structural constituent of cuticle	Class V
547	Aged Ag2S	Aged	ATP synthase subunit beta	ATP binding	HH combo
548	Aged Ag2S	Aged	ATP synthase subunit beta	ATP binding	HH combo
549	Aged Ag2S	Aged	ATP synthase subunit beta	ATP binding	HH combo
1912	Aged Ag2S	Aged	ATP-dependent zinc metalloprotease YME1L1	ATP binding	Class I
550	Aged Ag2S	Aged	Bm8 interacting protein 2d-4	Unreviewed	HH combo
1926	Aged Ag2S	Aged	Calmodulin	Calcium ion binding	Class I
551	Aged Ag2S	Aged	Calmodulin	Calcium ion binding	HH combo
1913	Aged Ag2S	Aged	Carbamoyl-phosphate synthase large chain	ATP binding	Class I
552	Aged Ag2S	Aged	Carbamoyl-phosphate synthase large chain	ATP binding	HH combo
553	Aged Ag2S	Aged	Chemosensory protein 13	Unreviewed	HH combo
554	Aged Ag2S	Aged	Chitin deacetylase 1	Catalytic activity	HH combo
1954	Aged Ag2S	Aged	Chorion peroxidase	Heme binding	Class I
555	Aged Ag2S	Aged	Chorion peroxidase	Heme binding	HH combo
556	Aged Ag2S	Aged	Chorion peroxidase	Heme binding	HH combo
557	Aged Ag2S	Aged	Chorion peroxidase	Heme binding	HH combo
1181	Aged Ag2S	Aged	Chymotrypsin elastase family member 2A	Serine-type endopeptidase activity	Class V
558	Aged Ag2S	Aged	Collagen alpha-5(VI) chain	Unreviewed	HH combo
559	Aged Ag2S	Aged	Collagen alpha-5(VI) chain/sw-like protein	Unreviewed	HH combo
560	Aged Ag2S	Aged	Copper-zinc cu-zn superoxide dismutase	Lipid transporter activity	HH combo
561	Aged Ag2S	Aged	Cuticle protein	Structural constituent of cuticle	HH combo
562	Aged Ag2S	Aged	Cuticular protein	Structural constituent of cuticle	HH combo
563	Aged Ag2S	Aged	Cuticular protein 49Ag	Structural constituent of cuticle	HH combo
564	Aged Ag2S	Aged	Cuticular protein analogous to peritrophins 3	Chitin binding	HH combo
565	Aged Ag2S	Aged	Cuticular protein analogous to peritrophins 3	Chitin binding	HH combo
566	Aged Ag2S	Aged	Cuticular protein analogous to peritrophins 3	Chitin binding	HH combo
567	Aged Ag2S	Aged	Cuticular protein analogous to peritrophins 3	Chitin binding	HH combo
568	Aged Ag2S	Aged	Cuticular protein analogous to peritrophins 3	Chitin binding	HH combo
1182	Aged Ag2S	Aged	Cytochrome p450	Heme binding	Class V
1927	Aged Ag2S	Aged	DNA-directed RNA polymerase subunit beta	DNA binding	Class I
1183	Aged Ag2S	Aged	DNA-directed RNA polymerase subunit beta	DNA binding	Class V
569	Aged Ag2S	Aged	DNA-directed RNA polymerase subunit beta'	DNA binding	HH combo
1936	Aged Ag2S	Aged	Elongation factor 1-alpha	GTP binding	Class I
1937	Aged Ag2S	Aged	Elongation factor 1-alpha	GTP binding	Class I
1938	Aged Ag2S	Aged	Elongation factor 1-alpha	GTP binding	Class I
1184	Aged Ag2S	Aged	Elongation factor 1-alpha	GTP binding	Class V
1185	Aged Ag2S	Aged	Elongation factor G,	GTP binding	Class V
1939	Aged Ag2S	Aged	Elongation factor Tu	GTP binding	Class I
1940	Aged Ag2S	Aged	Elongation factor Tu	GTP binding	Class I
1186	Aged Ag2S	Aged	Elongation factor Tu	Nucleotide binding	Class V
1187	Aged Ag2S	Aged	Elongation factor Tu	GTP binding	Class V
570	Aged Ag2S	Aged	Elongation factor Tu	GTP binding	HH combo
1914	Aged Ag2S	Aged	Eukaryotic initiation factor 4A-II	ATP binding	Class I
1915	Aged Ag2S	Aged	Eukaryotic initiation factor 4A-II	ATP binding	Class I
1916	Aged Ag2S	Aged	Eukaryotic initiation factor 4A-II	ATP binding	Class I
1188	Aged Ag2S	Aged	Eukaryotic initiation factor 4A-II	ATP binding	Class V
571	Aged Ag2S	Aged	Eukaryotic initiation factor 4A-II	ATP binding	HH combo
572	Aged Ag2S	Aged	Ferric-chelate reductase	Unreviewed	HH combo
1932	Aged Ag2S	Aged	Fructose-bisphosphate aldolase	Fructose-bisphosphate aldolase activity	Class I
1189	Aged Ag2S	Aged	Fructose-bisphosphate aldolase	Fructose-bisphosphate aldolase activity	Class V
1933	Aged Ag2S	Aged	Glutamine synthetase	Glutamate-ammonia ligase activity	Class I
1190	Aged Ag2S	Aged	Glutamine synthetase	Glutamate-ammonia ligase activity	Class V
1191	Aged Ag2S	Aged	Gly d 3	Serine-type endopeptidase activity	Class V
573	Aged Ag2S	Aged	Gly d 3	Serine-type endopeptidase activity	HH combo
1959	Aged Ag2S	Aged	Glyceraldehyde-3-phosphate dehydrogenase	NAD binding	Class I
1192	Aged Ag2S	Aged	Glyceraldehyde-3-phosphate dehydrogenase	NAD binding	Class V
574	Aged Ag2S	Aged	Glyceraldehyde-3-phosphate dehydrogenase	Glyceraldehyde-3-phosphate dehydrogenase (NAD+) (phosphorylating) activity	HH combo
575	Aged Ag2S	Aged	Gram-negative bacteria-binding protein	Hydrolase activity	HH combo
1941	Aged Ag2S	Aged	GTP-binding nuclear protein	GTP binding	Class I
576	Aged Ag2S	Aged	GTP-binding nuclear protein	GTP binding	HH combo
1942	Aged Ag2S	Aged	GTP-binding protein SAR1a	GTP binding	Class I
577	Aged Ag2S	Aged	Guanine nucleotide-binding protein subunit beta-2 1	Serine-type endopeptidase activity	HH combo
1917	Aged Ag2S	Aged	Heat shock 70 kDa protein cognate	ATP binding	Class I
1918	Aged Ag2S	Aged	Heat shock 70 kDa protein cognate	ATP binding	Class I
1193	Aged Ag2S	Aged	Heat shock 70 kDa protein cognate	ATP binding	Class V
1194	Aged Ag2S	Aged	Heat shock 70 kDa protein cognate	ATP binding	Class V
578	Aged Ag2S	Aged	Heat shock 70 kDa protein cognate	ATP binding	HH combo
1919	Aged Ag2S	Aged	Heat shock protein HSP 90-alpha	ATP binding	Class I
579	Aged Ag2S	Aged	Heat shock protein HSP 90-alpha	ATP binding	HH combo
1195	Aged Ag2S	Aged	Helicase c-terminal domain containing protein	ATP binding	Class V
1196	Aged Ag2S	Aged	Histone H2A	DNA binding	Class V
580	Aged Ag2S	Aged	Histone H2A	DNA binding	HH combo
1928	Aged Ag2S	Aged	Histone H2B	DNA binding	Class I
1197	Aged Ag2S	Aged	Histone H2B	DNA binding	Class V
581	Aged Ag2S	Aged	Histone H2B	DNA binding	HH combo
1929	Aged Ag2S	Aged	Histone H3.2	DNA binding	Class I
1198	Aged Ag2S	Aged	Histone H3.2	DNA binding	Class V
582	Aged Ag2S	Aged	Histone H3.2	DNA binding	HH combo
1930	Aged Ag2S	Aged	Histone H4	DNA binding	Class I
1199	Aged Ag2S	Aged	Histone H4	DNA binding	Class V
583	Aged Ag2S	Aged	Histone H4	DNA binding	HH combo
1960	Aged Ag2S	Aged	Isocitrate dehydrogenase [NADP]	NAD binding	Class I
1200	Aged Ag2S	Aged	Isocitrate dehydrogenase [NADP]	Isocitrate dehydrogenase (NADP+) activity	Class V
584	Aged Ag2S	Aged	Isocitrate dehydrogenase [NADP]	Isocitrate dehydrogenase (NADP+) activity	HH combo
1958	Aged Ag2S	Aged	Isocitrate lyase	Isocitrate lyase activity	Class I
1201	Aged Ag2S	Aged	Lamin-A	Structural molecule activity	Class V
585	Aged Ag2S	Aged	Matrix metalloproteinase 1	Metalloendopeptidase activity	HH combo
1202	Aged Ag2S	Aged	Mitotic control dis3-like protein	Structural constituent of ribosome	Class V
586	Aged Ag2S	Aged	Mitotic control dis3-like protein	Structural constituent of ribosome	HH combo
1920	Aged Ag2S	Aged	Multidrug resistance-associated protein lethal(2)03659	ATP binding	Class I
1961	Aged Ag2S	Aged	NADH dehydrogenase [ubiquinone] iron-sulfur protein 3	NADH dehydrogenase (ubiquinone) activity	Class I
587	Aged Ag2S	Aged	NADH dehydrogenase [ubiquinone] iron-sulfur protein 7	4 iron, 4 sulfur cluster binding	HH combo
1956	Aged Ag2S	Aged	Nascent polypeptide-associated complex subunit alpha	Integral component of membrane	Class I
588	Aged Ag2S	Aged	Nascent polypeptide-associated complex subunit alpha, muscle-specific form	Unreviewed	HH combo
589	Aged Ag2S	Aged	Niemann-Pick type C-2d	Unreviewed	HH combo
590	Aged Ag2S	Aged	Obstructor-A	Chitin binding	HH combo
591	Aged Ag2S	Aged	Peptidoglycan-associated lipoprotein	Unreviewed	HH combo
1962	Aged Ag2S	Aged	Peptidyl-prolyl cis-trans isomerase	Peptidyl-prolyl cis-trans isomerase activity	Class I
1203	Aged Ag2S	Aged	Phosphate import ATP-binding protein PstB	ATP binding	Class V
1965	Aged Ag2S	Aged	Polyadenylate-binding protein	RNA binding	Class I
1974	Aged Ag2S	Aged	Polyubiquitin-C	Unreviewed	Class I
592	Aged Ag2S	Aged	Polyubiquitin-C	Unreviewed	HH combo
1975	Aged Ag2S	Aged	Prohibitin-2	Unreviewed	Class I
593	Aged Ag2S	Aged	Putative 39S ribosomal protein L3	Structural constituent of ribosome	HH combo
1204	Aged Ag2S	Aged	Putative 40S ribosomal protein	Structural constituent of ribosome	Class V
1972	Aged Ag2S	Aged	Putative 60S ribosomal protein	Structural constituent of ribosome	Class I
1973	Aged Ag2S	Aged	Putative 60S ribosomal protein	Structural constituent of ribosome	Class I
1901	Aged Ag2S	Aged	Putative Adenosylhomocysteinase adohcyaseec hydrolase	Adenosylhomocysteinase activity	Class I
1205	Aged Ag2S	Aged	Putative Adenosylhomocysteinase adohcyaseec hydrolase	Adenosylhomocysteinase activity	Class V
594	Aged Ag2S	Aged	Putative ATP-binding cassette sub-family F member	ATP binding	HH combo
595	Aged Ag2S	Aged	Putative Ccp84Ae	Structural constituent of cuticle	HH combo
1943	Aged Ag2S	Aged	Putative Elongation factor 1-alpha	GTP binding	Class I
1944	Aged Ag2S	Aged	Putative Elongation factor 1-alpha	GTP binding	Class I
1206	Aged Ag2S	Aged	Putative Elongation factor 1-alpha	GTP binding	Class V
596	Aged Ag2S	Aged	Putative Elongation factor 1-alpha	GTP binding	HH combo
1921	Aged Ag2S	Aged	Putative Heat shock 70 kDa protein cognate	ATP binding	Class I
597	Aged Ag2S	Aged	Putative Heat shock 70 kDa protein cognate	ATP binding	HH combo
1922	Aged Ag2S	Aged	Putative Heat shock protein HSP 90-alpha	ATP binding	Class I
598	Aged Ag2S	Aged	Putative Neurogenic locus notch protein	Calcium ion binding	HH combo
1976	Aged Ag2S	Aged	Putative Polyubiquitin-B	Unreviewed	Class I
599	Aged Ag2S	Aged	Putative Pupal cuticle protein	Structural constituent of cuticle	HH combo
600	Aged Ag2S	Aged	Putative Serine protease inhibitor	Peptidase activity	HH combo
601	Aged Ag2S	Aged	Putative Zormin	Unreviewed	HH combo
602	Aged Ag2S	Aged	Putative Zormin	Unreviewed	HH combo
1945	Aged Ag2S	Aged	Ras-related protein Rab-11B	GTP binding	Class I
603	Aged Ag2S	Aged	Ras-related protein Rab-11B	GTP binding	HH combo
1946	Aged Ag2S	Aged	Ras-related protein Rab-7a	GTP binding	Class I
1207	Aged Ag2S	Aged	Ras-related protein Rab-7a	GTP binding	Class V
1947	Aged Ag2S	Aged	Ribosome-releasing factor 2	GTP binding	Class I
1923	Aged Ag2S	Aged	S-adenosylmethionine synthase	ATP binding	Class I
604	Aged Ag2S	Aged	Serine protease inhibitor	Peptidase activity	HH combo
1208	Aged Ag2S	Aged	Sulfate transporter	Secondary active sulfate transmembrane transporter activity	Class V
605	Aged Ag2S	Aged	Superoxide dismutase [Cu-Zn]	Metal ion binding	HH combo
1924	Aged Ag2S	Aged	Transitional endoplasmic reticulum ATPase TER94	ATP binding	Class I
1966	Aged Ag2S	Aged	Trypsin serine protease	Serine-type endopeptidase activity	Class I
1948	Aged Ag2S	Aged	Tubulin alpha chain	GTP binding	Class I
1949	Aged Ag2S	Aged	Tubulin alpha chain	GTP binding	Class I
1950	Aged Ag2S	Aged	Tubulin alpha chain	GTP binding	Class I
1951	Aged Ag2S	Aged	Tubulin beta chain	GTP binding	Class I
1952	Aged Ag2S	Aged	Tubulin beta chain	GTP binding	Class I
1953	Aged Ag2S	Aged	Tubulin beta chain	GTP binding	Class I
1209	Aged Ag2S	Aged	Tubulin beta chain	GTP binding	Class V
1210	Aged Ag2S	Aged	Tubulin beta chain	GTP binding	Class V
606	Aged Ag2S	Aged	Tubulin beta chain	GTP binding	HH combo
607	Aged Ag2S	Aged	Tubulin beta chain	GTP binding	HH combo
1925	Aged Ag2S	Aged	Uncharacterized protein	Calcium ion binding	Class I
1931	Aged Ag2S	Aged	Uncharacterized protein	DNA binding	Class I
1955	Aged Ag2S	Aged	Uncharacterized protein	Hydrolase activity	Class I
1957	Aged Ag2S	Aged	Uncharacterized protein	IoInotropic glutamate receptor activity	Class I
1963	Aged Ag2S	Aged	Uncharacterized protein	Protein-chromophore linkage	Class I
1977	Aged Ag2S	Aged	Uncharacterized protein	Unreviewed	Class I
1978	Aged Ag2S	Aged	Uncharacterized protein	Unreviewed	Class I
1211	Aged Ag2S	Aged	Uncharacterized protein	Structural constituent of cuticle	Class V
1212	Aged Ag2S	Aged	Uncharacterized protein	Protein-chromophore linkage	Class V
1213	Aged Ag2S	Aged	Uncharacterized protein	Structural constituent of cuticle	Class V
1214	Aged Ag2S	Aged	Uncharacterized protein	Structural constituent of cuticle	Class V
1215	Aged Ag2S	Aged	Uncharacterized protein	Structural constituent of ribosome	Class V
1216	Aged Ag2S	Aged	Uncharacterized protein	Integral component of membrane	Class V
1217	Aged Ag2S	Aged	Uncharacterized protein	DNA binding	Class V
1218	Aged Ag2S	Aged	Uncharacterized protein	GTP binding	Class V
1219	Aged Ag2S	Aged	Uncharacterized protein	Unreviewed	Class V
1220	Aged Ag2S	Aged	Uncharacterized protein	Receptor activity	Class V
1221	Aged Ag2S	Aged	Uncharacterized protein	Structural constituent of ribosome	Class V
1222	Aged Ag2S	Aged	Uncharacterized protein	Structural constituent of cuticle	Class V
608	Aged Ag2S	Aged	Uncharacterized protein	Structural constituent of cuticle	HH combo
609	Aged Ag2S	Aged	Uncharacterized protein	Unreviewed	HH combo
610	Aged Ag2S	Aged	Uncharacterized protein	Structural constituent of cuticle	HH combo
611	Aged Ag2S	Aged	Uncharacterized protein	Unreviewed	HH combo
612	Aged Ag2S	Aged	Uncharacterized protein	Pigment binding	HH combo
613	Aged Ag2S	Aged	Uncharacterized protein	Receptor activity	HH combo
614	Aged Ag2S	Aged	Uncharacterized protein	Enzyme activator activity	HH combo
615	Aged Ag2S	Aged	Uncharacterized protein	Unreviewed	HH combo
616	Aged Ag2S	Aged	Uncharacterized protein	Structural constituent of cuticle	HH combo
617	Aged Ag2S	Aged	Uncharacterized protein	Structural constituent of cuticle	HH combo
618	Aged Ag2S	Aged	Uncharacterized protein	Structural constituent of cuticle	HH combo
619	Aged Ag2S	Aged	Uncharacterized protein	Structural constituent of cuticle	HH combo
620	Aged Ag2S	Aged	Uncharacterized protein	Structural constituent of cuticle	HH combo
621	Aged Ag2S	Aged	Uncharacterized protein	Structural constituent of cuticle	HH combo
622	Aged Ag2S	Aged	Uncharacterized protein	Structural constituent of cuticle	HH combo
623	Aged Ag2S	Aged	Uncharacterized protein	Structural constituent of cuticle	HH combo
624	Aged Ag2S	Aged	Uncharacterized protein	Structural constituent of cuticle	HH combo
625	Aged Ag2S	Aged	Uncharacterized protein	Structural constituent of cuticle	HH combo
626	Aged Ag2S	Aged	Uncharacterized protein	Structural constituent of cuticle	HH combo
627	Aged Ag2S	Aged	Uncharacterized protein	Unreviewed	HH combo
628	Aged Ag2S	Aged	Uncharacterized protein	Unreviewed	HH combo
629	Aged Ag2S	Aged	Uncharacterized protein	Structural constituent of cuticle	HH combo
630	Aged Ag2S	Aged	Uncharacterized protein	Unreviewed	HH combo
631	Aged Ag2S	Aged	Uncharacterized protein	Unreviewed	HH combo
632	Aged Ag2S	Aged	Uncharacterized protein	Unreviewed	HH combo
633	Aged Ag2S	Aged	Uncharacterized protein	Integral component of membrane	HH combo
634	Aged Ag2S	Aged	Uncharacterized protein	Structural constituent of cuticle	HH combo
635	Aged Ag2S	Aged	Uncharacterized protein	structural constituent of cuticle	HH combo
636	Aged Ag2S	Aged	Uncharacterized protein	Unreviewed	HH combo
637	Aged Ag2S	Aged	Uncharacterized protein	Structural constituent of cuticle	HH combo
638	Aged Ag2S	Aged	Uncharacterized protein	Unreviewed	HH combo
639	Aged Ag2S	Aged	Uncharacterized protein	Unreviewed	HH combo
640	Aged Ag2S	Aged	Uncharacterized protein	Unreviewed	HH combo
641	Aged Ag2S	Aged	Uncharacterized protein	Unreviewed	HH combo
642	Aged Ag2S	Aged	Uncharacterized protein	Protein-chromophore linkage	HH combo
643	Aged Ag2S	Aged	Uncharacterized protein	Unreviewed	HH combo
644	Aged Ag2S	Aged	Uncharacterized protein	Protein-chromophore linkage	HH combo
645	Aged Ag2S	Aged	Uncharacterized protein	Unreviewed	HH combo
646	Aged Ag2S	Aged	Uncharacterized protein	Unreviewed	HH combo
647	Aged Ag2S	Aged	Uncharacterized protein	Unreviewed	HH combo
648	Aged Ag2S	Aged	Uncharacterized protein	Unreviewed	HH combo
649	Aged Ag2S	Aged	Uncharacterized protein	Unreviewed	HH combo
650	Aged Ag2S	Aged	Uncharacterized protein	Structural constituent of ribosome	HH combo
651	Aged Ag2S	Aged	Uncharacterized protein	Unreviewed	HH combo
652	Aged Ag2S	Aged	Uncharacterized protein	Unreviewed	HH combo
653	Aged Ag2S	Aged	Uncharacterized protein	Structural constituent of cuticle	HH combo
654	Aged Ag2S	Aged	Uncharacterized protein	Unreviewed	HH combo
655	Aged Ag2S	Aged	Uncharacterized protein	Unreviewed	HH combo
656	Aged Ag2S	Aged	Uncharacterized protein	Unreviewed	HH combo
657	Aged Ag2S	Aged	Zormin	Structural constituent of cuticle	HH combo
658	Aged Ag2S	Aged	Zormin	Structural constituent of cuticle	HH combo
659	Aged Ag2S	Aged	Zormin	Structural constituent of cuticle	HH combo
1284	Aged PVP Ag	Aged	2-oxoglutarate dehydrogenase E1 component-like protein	Oxoglutarate dehydrogenase (succinyl-transferring) activity	Class V
1285	Aged PVP Ag	Aged	39S ribosomal protein	Structural constituent of ribosome	Class V
718	Aged PVP Ag	Aged	3-hydroxyacyl-[acyl-carrier-protein] dehydratase FabZ	3-hydroxyoctanoyl-[acyl-carrier-protein] dehydratase activity	HH combo
1286	Aged PVP Ag	Aged	40S ribosomal protein	Structural constituent of ribosome	Class V
1287	Aged PVP Ag	Aged	40S ribosomal protein	Structural constituent of ribosome	Class V
1288	Aged PVP Ag	Aged	40S ribosomal protein	Structural constituent of ribosome	Class V
1289	Aged PVP Ag	Aged	40S ribosomal protein	Structural constituent of ribosome	Class V
719	Aged PVP Ag	Aged	40S ribosomal protein	RNA binding	HH combo
1660	Aged PVP Ag	Aged	40S ribosomal protein S14	Structural constituent of ribosome	Class I
1661	Aged PVP Ag	Aged	40S ribosomal protein S5	Structural constituent of ribosome	Class I
1662	Aged PVP Ag	Aged	40S ribosomal protein SA	Structural constituent of ribosome	Class I
1290	Aged PVP Ag	Aged	50s ribosomal protein	Unreviewed	Class V
1291	Aged PVP Ag	Aged	60S ribosomal protein	Structural constituent of ribosome	Class V
1292	Aged PVP Ag	Aged	60S ribosomal protein	Structural constituent of ribosome	Class V
720	Aged PVP Ag	Aged	60S ribosomal protein	Structural constituent of ribosome	HH combo
1663	Aged PVP Ag	Aged	60S ribosomal protein L13	Structural constituent of ribosome	Class I
1664	Aged PVP Ag	Aged	60S ribosomal protein L6	Structural constituent of ribosome	Class I
1665	Aged PVP Ag	Aged	Actin, alpha skeletal muscle	ATP binding	Class I
1293	Aged PVP Ag	Aged	Actin, alpha skeletal muscle	ATP binding	Class V
1294	Aged PVP Ag	Aged	Actin, alpha skeletal muscle	ATP binding	Class V
1295	Aged PVP Ag	Aged	Actin, alpha skeletal muscle	Unreviewed	Class V
721	Aged PVP Ag	Aged	Actin, alpha skeletal muscle	ATP binding	HH combo
1296	Aged PVP Ag	Aged	Adenosine deaminase	Unreviewed	Class V
1666	Aged PVP Ag	Aged	ADP-ribosylation factor	GTP binding	Class I
1297	Aged PVP Ag	Aged	ADP-ribosylation factor	GTP binding	Class V
1667	Aged PVP Ag	Aged	Alpha-enolase	Magnesium ion binding	Class I
722	Aged PVP Ag	Aged	Arf-GAP with GTPase, ANK repeat and PH domain-containing protein	GTP binding	HH combo
1668	Aged PVP Ag	Aged	ATP synthase subunit alpha	ATP binding	Class I
1669	Aged PVP Ag	Aged	ATP synthase subunit alpha	ATP binding	Class I
1670	Aged PVP Ag	Aged	ATP synthase subunit alpha	ATP binding	Class I
1298	Aged PVP Ag	Aged	ATP synthase subunit alpha	ATP biniding	Class V
1299	Aged PVP Ag	Aged	ATP synthase subunit alpha	ATP biniding	Class V
1300	Aged PVP Ag	Aged	ATP synthase subunit alpha	ATP biniding	Class V
723	Aged PVP Ag	Aged	ATP synthase subunit alpha	ATP binding	HH combo
1671	Aged PVP Ag	Aged	ATP synthase subunit beta	ATP binding	Class I
1672	Aged PVP Ag	Aged	ATP synthase subunit beta	ATP binding	Class I
1301	Aged PVP Ag	Aged	ATP synthase subunit beta	ATP biniding	Class V
1302	Aged PVP Ag	Aged	ATP synthase subunit beta	ATP biniding	Class V
1303	Aged PVP Ag	Aged	ATP synthase subunit beta	ATP biniding	Class V
724	Aged PVP Ag	Aged	ATP synthase subunit beta	ATP binding	HH combo
1673	Aged PVP Ag	Aged	ATP-dependent zinc metalloprotease YME1L1	ATP binding	Class I
1304	Aged PVP Ag	Aged	Boundary element associated factor	Peroxiredoxin activity	Class V
725	Aged PVP Ag	Aged	Calcium-transporting ATPase type 2C member-like protein	Nucleotide binding	HH combo
1674	Aged PVP Ag	Aged	Calmodulin	Calcium ion binding	Class I
1305	Aged PVP Ag	Aged	Carbamoyl-phosphate synthase large chain	ATP biniding	Class V
726	Aged PVP Ag	Aged	Carbamoyl-phosphate synthase large chain	ATP binding	HH combo
1306	Aged PVP Ag	Aged	Chymotrypsin BI	Serine-type endopeptidase activity	Class V
1307	Aged PVP Ag	Aged	Chymotrypsin elastase family member 2A	Serine-type endopeptidase activity	Class V
727	Aged PVP Ag	Aged	Chymotrypsin elastase family member 2A	Serine-type endopeptidase activity	HH combo
1308	Aged PVP Ag	Aged	Copper-zinc cu-zn superoxide dismutase	Lipid transporter activity	Class V
1309	Aged PVP Ag	Aged	DNA-directed RNA polymerase subunit beta	DNA binding	Class V
1310	Aged PVP Ag	Aged	Elongation factor 1-alpha	GTP binding	Class V
728	Aged PVP Ag	Aged	Elongation factor 1-alpha	GTP binding	HH combo
729	Aged PVP Ag	Aged	Elongation factor 1-alpha	GTP binding	HH combo
1311	Aged PVP Ag	Aged	Elongation factor G	GTP binding	Class V
1312	Aged PVP Ag	Aged	Elongation factor G	GTP binding	Class V
1675	Aged PVP Ag	Aged	Elongation factor Tu	GTP binding	Class I
1313	Aged PVP Ag	Aged	Elongation factor Tu	GTP binding	Class V
730	Aged PVP Ag	Aged	Elongation factor Tu	GTP binding	HH combo
1676	Aged PVP Ag	Aged	Eukaryotic initiation factor 4A-II	ATP binding	Class I
1677	Aged PVP Ag	Aged	Eukaryotic initiation factor 4A-II	ATP binding	Class I
1678	Aged PVP Ag	Aged	Eukaryotic initiation factor 4A-II	ATP binding	Class I
1314	Aged PVP Ag	Aged	Eukaryotic initiation factor 4A-II	ATP biniding	Class V
1679	Aged PVP Ag	Aged	Fructose-bisphosphate aldolase	Fructose-bisphosphate aldolase activity	Class I
1680	Aged PVP Ag	Aged	Fructose-bisphosphate aldolase	Fructose-bisphosphate aldolase activity	Class I
1315	Aged PVP Ag	Aged	Fructose-bisphosphate aldolase	Fructose-bisphosphate aldolase activity	Class V
731	Aged PVP Ag	Aged	Fructose-bisphosphate aldolase	Fructose-bisphosphate aldolase activity	HH combo
1316	Aged PVP Ag	Aged	Glutamine synthetase	Glutamate-ammonia ligase activity	Class V
732	Aged PVP Ag	Aged	Glutamine synthetase	Glutamate-ammonia ligase activity	HH combo
1317	Aged PVP Ag	Aged	Gly d 3	Serine-type endopeptidase activity	Class V
1681	Aged PVP Ag	Aged	Glyceraldehyde-3-phosphate dehydrogenase	NAD binding	Class I
1318	Aged PVP Ag	Aged	Glyceraldehyde-3-phosphate dehydrogenase	NAD binding	Class V
1319	Aged PVP Ag	Aged	Glyceraldehyde-3-phosphate dehydrogenase	NAD binding	Class V
733	Aged PVP Ag	Aged	Gram-negative bacteria-binding protein	Hydrolase activity	HH combo
1682	Aged PVP Ag	Aged	GTP-binding nuclear protein	GTP binding	Class I
734	Aged PVP Ag	Aged	GTP-binding nuclear protein	GTP binding	HH combo
1683	Aged PVP Ag	Aged	GTP-binding protein SAR1a	GTP binding	Class I
1320	Aged PVP Ag	Aged	Guanine nucleotide-binding protein subunit beta-2 1	Unreviewed	Class V
1684	Aged PVP Ag	Aged	Heat shock 70 kDa protein cognate	ATP binding	Class I
1685	Aged PVP Ag	Aged	Heat shock 70 kDa protein cognate	ATP binding	Class I
1321	Aged PVP Ag	Aged	Heat shock 70 kDa protein cognate	ATP binding	Class V
1322	Aged PVP Ag	Aged	Heat shock 70 kDa protein cognate	ATP binding	Class V
735	Aged PVP Ag	Aged	Heat shock 70 kDa protein cognate	ATP binding	HH combo
736	Aged PVP Ag	Aged	Heat shock protein HSP 90-alpha	ATP binding	HH combo
1686	Aged PVP Ag	Aged	Histone H2A	DNA binding	Class I
1687	Aged PVP Ag	Aged	Histone H2B	DNA binding	Class I
1688	Aged PVP Ag	Aged	Histone H3.2	DNA binding	Class I
737	Aged PVP Ag	Aged	Histone H3.2	DNA binding	HH combo
1689	Aged PVP Ag	Aged	Histone H4	DNA binding	Class I
1323	Aged PVP Ag	Aged	Histone H4	DNA binding	Class V
738	Aged PVP Ag	Aged	Histone H4	DNA binding	HH combo
1690	Aged PVP Ag	Aged	Isocitrate dehydrogenase [NADP]	NAD binding	Class I
739	Aged PVP Ag	Aged	Isocitrate dehydrogenase [NADP]	Isocitrate dehydrogenase (NADP+) activity	HH combo
1324	Aged PVP Ag	Aged	Lysosomal aspartic protease	Aspartic-type endopeptidase activity	Class V
1691	Aged PVP Ag	Aged	Malate dehydrogenase	L-malate dehydrogenase activity	Class I
1325	Aged PVP Ag	Aged	Matrix metalloproteinase 1	Metalloendopeptidase activity	Class V
1326	Aged PVP Ag	Aged	Mitotic control dis3-like protein	Structural constituent of ribosome	Class V
740	Aged PVP Ag	Aged	Myosin light chain kinase, smooth muscle	ATP binding	HH combo
1327	Aged PVP Ag	Aged	Myosin-2 essential light chain	Calcium ion binding	Class V
1328	Aged PVP Ag	Aged	Niemann-Pick type C-2d	Unreviewed	Class V
741	Aged PVP Ag	Aged	Phosphatidylinositol 3-kinase regulatory subunit beta	Kinase activity	HH combo
742	Aged PVP Ag	Aged	Polyadenylate-binding protein	RNA binding	HH combo
1329	Aged PVP Ag	Aged	Polyubiquitin-C	Unreviewed	Class V
1692	Aged PVP Ag	Aged	Prohibitin-2	Unreviewed	Class I
1693	Aged PVP Ag	Aged	Putative 40S ribosomal protein	Structural constituent of ribosome	Class I
743	Aged PVP Ag	Aged	Putative 40S ribosomal protein S14	Structural constituent of ribosome	HH combo
1330	Aged PVP Ag	Aged	Putative Abc transporter	ATP biniding	Class V
1331	Aged PVP Ag	Aged	Putative Acetyl-Coenzyme A synthetase	Catalytic activity	Class V
1694	Aged PVP Ag	Aged	Putative Actin, alpha skeletal muscle	Unreviewed	Class I
1332	Aged PVP Ag	Aged	Putative Actin, alpha skeletal muscle	Unreviewed	Class V
1695	Aged PVP Ag	Aged	Putative Adenosylhomocysteinase adohcyaseec hydrolase	Adenosylhomocysteinase activity	Class I
1333	Aged PVP Ag	Aged	Putative Adenosylhomocysteinase adohcyaseec hydrolase	Adenosylhomocysteinase activity	Class V
744	Aged PVP Ag	Aged	Putative ATP-binding cassette sub-family F member	ATP binding	HH combo
1696	Aged PVP Ag	Aged	Putative Elongation factor 1-alpha	GTP binding	Class I
1697	Aged PVP Ag	Aged	Putative Elongation factor 1-alpha	GTP binding	Class I
1334	Aged PVP Ag	Aged	Putative Elongation factor 1-alpha	GTP binding	Class V
1335	Aged PVP Ag	Aged	Putative Elongation factor 1-alpha	GTP binding	Class V
745	Aged PVP Ag	Aged	Putative Elongation factor 1-alpha	GTP binding	HH combo
1698	Aged PVP Ag	Aged	Putative Heat shock 70 kDa protein cognate	ATP binding	Class I
1336	Aged PVP Ag	Aged	Putative Lambda-crystallin	3-hydroxyacyl-CoA dehydrogenase activity	Class V
746	Aged PVP Ag	Aged	Putative Obstructor-A	Chitin binding	HH combo
1699	Aged PVP Ag	Aged	Putative Polyubiquitin-B	Unreviewed	Class I
1337	Aged PVP Ag	Aged	Putative Polyubiquitin-B	Unreviewed	Class V
1700	Aged PVP Ag	Aged	Ras-related protein Rab	GTP binding	Class I
1701	Aged PVP Ag	Aged	Ras-related protein Rab	GTP binding	Class I
1702	Aged PVP Ag	Aged	Ras-related protein Rab	GTP binding	Class I
747	Aged PVP Ag	Aged	Ribosomal protein L15	Structural constituent of ribosome	HH combo
1338	Aged PVP Ag	Aged	Ribosome-releasing factor 2, mitochondrial-like protein	GTP binfing	Class V
1703	Aged PVP Ag	Aged	S-adenosylmethionine synthase	ATP binding	Class I
1339	Aged PVP Ag	Aged	Serine protease P76	Serine-type endopeptidase activity	Class V
1704	Aged PVP Ag	Aged	Splicing factor U2AF 65 kDa subunit	RNA binding	Class I
1340	Aged PVP Ag	Aged	Tribolium castaneum nicotinic acetylcholine receptor subunit alpha10	Unreviewed	Class V
1705	Aged PVP Ag	Aged	Tubulin alpha chain	GTP binding	Class I
1706	Aged PVP Ag	Aged	Tubulin alpha chain	GTP binding	Class I
1341	Aged PVP Ag	Aged	Tubulin alpha chain	GTP binding	Class V
1707	Aged PVP Ag	Aged	Tubulin alpha-1 chain	GTP binding	Class I
1342	Aged PVP Ag	Aged	Tubulin alpha-1 chain-like protein	GTP binding	Class V
1708	Aged PVP Ag	Aged	Tubulin beta chain	GTP binding	Class I
1709	Aged PVP Ag	Aged	Tubulin beta chain	GTP binding	Class I
1710	Aged PVP Ag	Aged	Tubulin beta chain	GTP binding	Class I
1343	Aged PVP Ag	Aged	Tubulin beta chain	GTP binding	Class V
1344	Aged PVP Ag	Aged	Tubulin beta chain	GTP binding	Class V
1345	Aged PVP Ag	Aged	Tubulin beta chain	GTP binding	Class V
748	Aged PVP Ag	Aged	Tubulin beta chain	GTP binding	HH combo
1711	Aged PVP Ag	Aged	Uncharacterized protein	Unreviewed	Class I
1712	Aged PVP Ag	Aged	Uncharacterized protein	Protein-chromophore linkage	Class I
1346	Aged PVP Ag	Aged	Uncharacterized protein	Structural constituent of cuticle	Class V
1347	Aged PVP Ag	Aged	Uncharacterized protein	Structural constituent of cuticle	Class V
1348	Aged PVP Ag	Aged	Uncharacterized protein	Unreviewed	Class V
1349	Aged PVP Ag	Aged	Uncharacterized protein	Protein-chromophore linkage	Class V
1350	Aged PVP Ag	Aged	Uncharacterized protein	DNA binding	Class V
1351	Aged PVP Ag	Aged	Uncharacterized protein	Unreviewed	Class V
1352	Aged PVP Ag	Aged	Uncharacterized protein	Unreviewed	Class V
1353	Aged PVP Ag	Aged	Uncharacterized protein	Unreviewed	Class V
1354	Aged PVP Ag	Aged	Uncharacterized protein	Structural constituent of cuticle	Class V
1355	Aged PVP Ag	Aged	Uncharacterized protein	Unreviewed	Class V
1356	Aged PVP Ag	Aged	Uncharacterized protein	Unreviewed	Class V
1357	Aged PVP Ag	Aged	Uncharacterized protein	Unreviewed	Class V
1358	Aged PVP Ag	Aged	Uncharacterized protein	Unreviewed	Class V
1359	Aged PVP Ag	Aged	Uncharacterized protein	Unreviewed	Class V
1360	Aged PVP Ag	Aged	Uncharacterized protein	DNA binding	Class V
1361	Aged PVP Ag	Aged	Uncharacterized protein	Hydrolase activity	Class V
1362	Aged PVP Ag	Aged	Uncharacterized protein	Receptor activity	Class V
1363	Aged PVP Ag	Aged	Uncharacterized protein	5S rRNA binding	Class V
749	Aged PVP Ag	Aged	Uncharacterized protein	Protein-chromophore linkage	HH combo
750	Aged PVP Ag	Aged	Uncharacterized protein	Protein dimerization activity	HH combo
751	Aged PVP Ag	Aged	Uncharacterized protein	Unreviewed	HH combo
752	Aged PVP Ag	Aged	Vascular endothelial growth factor receptor	ATP binding	HH combo
1364	Aged PVP Ag	Aged	Vitellogenin-1	Lipid transporter activity	Class V
1713	Aged PVP Ag	Aged	V-type proton ATPase catalytic subunit A	ATP binding	Class I
1577	Aged TiO2 PVP	Aged	116 kDa U5 small nuclear ribonucleoprotein component protein	GTP binding	Class I
470	Aged TiO2 PVP	Aged	116 kDa U5 small nuclear ribonucleoprotein component protein	GTP binding	HH combo
1578	Aged TiO2 PVP	Aged	14-3-3 protein epsilon	Protein domain specific binding	Class I
1579	Aged TiO2 PVP	Aged	30S ribosomal protein	RNA binding	Class I
1223	Aged TiO2 PVP	Aged	3-hydroxyacyl-[acyl-carrier-protein] dehydratase FabZ	3-hydroxyoctanoyl-[acyl-carrier-protein] dehydratase activity	Class V
1224	Aged TiO2 PVP	Aged	3-hydroxyacyl-[acyl-carrier-protein] dehydratase FabZ	3-hydroxyoctanoyl-[acyl-carrier-protein] dehydratase activity	Class V
1580	Aged TiO2 PVP	Aged	40S ribosomal protein	Structural constituent of ribosome	Class I
1581	Aged TiO2 PVP	Aged	40S ribosomal protein	Structural constituent of ribosome	Class I
1582	Aged TiO2 PVP	Aged	40S ribosomal protein	RNA binding	Class I
1583	Aged TiO2 PVP	Aged	40S ribosomal protein	RNA binding	Class I
1225	Aged TiO2 PVP	Aged	40S ribosomal protein	Structural constituent of ribosome	Class V
1226	Aged TiO2 PVP	Aged	40S ribosomal protein	RNA binding	Class V
1227	Aged TiO2 PVP	Aged	40S ribosomal protein	RNA binding	Class V
1228	Aged TiO2 PVP	Aged	40S ribosomal protein	Structural constituent of ribosome	Class V
471	Aged TiO2 PVP	Aged	40S ribosomal protein	RNA binding	HH combo
487	Aged TiO2 PVP	Aged	40S ribosomal protein	Structural constituent of ribosome	HH combo
1584	Aged TiO2 PVP	Aged	50s ribosomal protein	Unreviewed	Class I
1585	Aged TiO2 PVP	Aged	60 kDa chaperonin	ATP binding	Class I
1586	Aged TiO2 PVP	Aged	60 kDa heat shock protein	ATP binding	Class I
1587	Aged TiO2 PVP	Aged	60S ribosomal protein	Structural constituent of ribosome	Class I
1588	Aged TiO2 PVP	Aged	60S ribosomal protein	Structural constituent of ribosome	Class I
1589	Aged TiO2 PVP	Aged	60S ribosomal protein	Structural constituent of ribosome	Class I
1590	Aged TiO2 PVP	Aged	60S ribosomal protein	Structural constituent of ribosome	Class I
1591	Aged TiO2 PVP	Aged	60S ribosomal protein	Structural constituent of ribosome	Class I
1229	Aged TiO2 PVP	Aged	60S ribosomal protein	Translation	Class V
472	Aged TiO2 PVP	Aged	60S ribosomal protein	RNA binding	HH combo
473	Aged TiO2 PVP	Aged	60S ribosomal protein	Translation	HH combo
474	Aged TiO2 PVP	Aged	60S ribosomal protein	RNA binding	HH combo
1592	Aged TiO2 PVP	Aged	Actin, alpha skeletal muscle	Unreviewed	Class I
1593	Aged TiO2 PVP	Aged	Actin, alpha skeletal muscle	ATP binding	Class I
1230	Aged TiO2 PVP	Aged	Actin, alpha skeletal muscle	ATP binding	Class V
475	Aged TiO2 PVP	Aged	Actin, alpha skeletal muscle	ATP binding	HH combo
1594	Aged TiO2 PVP	Aged	ADP-ribosylation factor	GTP binding	Class I
1231	Aged TiO2 PVP	Aged	ADP-ribosylation factor	GTP binding	Class V
476	Aged TiO2 PVP	Aged	ADP-ribosylation factor	GTP binding	HH combo
477	Aged TiO2 PVP	Aged	Anion exchange protein	Inorganic anion exchanger activity	HH combo
478	Aged TiO2 PVP	Aged	Apolipoprotein D	Aging	HH combo
1595	Aged TiO2 PVP	Aged	Argininosuccinate lyase	Argininosuccinate lyase activity	Class I
1596	Aged TiO2 PVP	Aged	Armadillo segment polarity protein	Signal transducer activity	Class I
1597	Aged TiO2 PVP	Aged	ATP synthase subunit alpha	ATP binding	Class I
1598	Aged TiO2 PVP	Aged	ATP synthase subunit alpha	ATP binding	Class I
1232	Aged TiO2 PVP	Aged	ATP synthase subunit alpha	ATP binding	Class V
1233	Aged TiO2 PVP	Aged	ATP synthase subunit alpha	ATP binding	Class V
1234	Aged TiO2 PVP	Aged	ATP synthase subunit alpha	ATP binding	Class V
1235	Aged TiO2 PVP	Aged	ATP synthase subunit alpha	ATP binding	Class V
1236	Aged TiO2 PVP	Aged	ATP synthase subunit alpha	ATP binding	Class V
479	Aged TiO2 PVP	Aged	ATP synthase subunit alpha	ATP binding	HH combo
480	Aged TiO2 PVP	Aged	ATP synthase subunit alpha	ATP binding	HH combo
481	Aged TiO2 PVP	Aged	ATP synthase subunit alpha	ATP binding	HH combo
1599	Aged TiO2 PVP	Aged	ATP synthase subunit beta	ATP binding	Class I
1600	Aged TiO2 PVP	Aged	ATP synthase subunit beta	ATP binding	Class I
1237	Aged TiO2 PVP	Aged	ATP synthase subunit beta	ATP binding	Class V
1238	Aged TiO2 PVP	Aged	ATP synthase subunit beta	ATP binding	Class V
482	Aged TiO2 PVP	Aged	ATP synthase subunit beta	ATP binding	HH combo
483	Aged TiO2 PVP	Aged	ATP synthase subunit beta	ATP binding	HH combo
1601	Aged TiO2 PVP	Aged	ATP-dependent RNA helicase DDX39A	ATP binding	Class I
484	Aged TiO2 PVP	Aged	ATP-dependent RNA helicase DDX46	ATP binding	HH combo
1602	Aged TiO2 PVP	Aged	ATP-dependent zinc metalloprotease YME1L1	ATP binding	Class I
1239	Aged TiO2 PVP	Aged	ATP-dependent zinc metalloprotease YME1L1	Metalloendopeptidase activity	Class V
485	Aged TiO2 PVP	Aged	ATP-dependent zinc metalloprotease YME1L1	Metal ion binding	HH combo
1240	Aged TiO2 PVP	Aged	Calcium-transporting ATPase type 2C member-like protein	Nucleotide binding	Class V
1241	Aged TiO2 PVP	Aged	Calcium-transporting ATPase type 2C member-like protein	Nucleotide binding	Class V
1603	Aged TiO2 PVP	Aged	Calmodulin	Calcium ion binding	Class I
1604	Aged TiO2 PVP	Aged	Carbamoyl-phosphate synthase large chain	ATP binding	Class I
1242	Aged TiO2 PVP	Aged	Carbamoyl-phosphate synthase large chain	ATP binding	Class V
486	Aged TiO2 PVP	Aged	Carbamoyl-phosphate synthase large chain	L-arginine biosynthesis	HH combo
1605	Aged TiO2 PVP	Aged	Chaperone protein ClpB	ATP binding	Class I
488	Aged TiO2 PVP	Aged	Chemosensory protein 13	Unreviewed	HH combo
489	Aged TiO2 PVP	Aged	Chorion peroxidase	Heme binding	HH combo
1243	Aged TiO2 PVP	Aged	Chymotrypsin BI	Chitin binding	Class V
490	Aged TiO2 PVP	Aged	Chymotrypsin BI	Chitin binding	HH combo
1244	Aged TiO2 PVP	Aged	Chymotrypsin elastase family member 2A	Serine-type endopeptidase activity	Class V
491	Aged TiO2 PVP	Aged	Chymotrypsin elastase family member 2A	Acts upon elastin	HH combo
1245	Aged TiO2 PVP	Aged	Clip-domain serine protease	Serine-type endopeptidase activity	Class V
1246	Aged TiO2 PVP	Aged	Clip-domain serine protease	Serine-type endopeptidase activity	Class V
492	Aged TiO2 PVP	Aged	Clip-domain serine protease	Serine-type endopeptidase activity	HH combo
1606	Aged TiO2 PVP	Aged	Coatomer subunit gamma	Structural molecule activity	Class I
493	Aged TiO2 PVP	Aged	Cuticular protein analogous to peritrophins 3-D1	Chitin binding	HH combo
495	Aged TiO2 PVP	Aged	Cuticular protein analogous to peritrophins 3-E	Chitin binding	HH combo
1247	Aged TiO2 PVP	Aged	Cytochrome c-2	Electron transfer activity	Class V
1248	Aged TiO2 PVP	Aged	Cytochrome c-2	Electron transfer activity	Class V
1607	Aged TiO2 PVP	Aged	DNA-directed RNA polymerase subunit alpha	DNA binding	Class I
1608	Aged TiO2 PVP	Aged	DNA-directed RNA polymerase subunit beta	DNA binding	Class I
1609	Aged TiO2 PVP	Aged	DNA-directed RNA polymerase subunit beta	DNA binding	Class I
1610	Aged TiO2 PVP	Aged	DNA-directed RNA polymerase subunit beta	DNA binding	Class I
1249	Aged TiO2 PVP	Aged	DNA-directed RNA polymerase subunit beta	DNA binding	Class V
496	Aged TiO2 PVP	Aged	DNA-directed RNA polymerase subunit beta	DNA binding	HH combo
1250	Aged TiO2 PVP	Aged	Double oxidase: two peroxidase domains	Heme binding	Class V
497	Aged TiO2 PVP	Aged	Double oxidase: two peroxidase domains	Heme binding	HH combo
498	Aged TiO2 PVP	Aged	Double oxidase: two peroxidase domains	Heme binding	HH combo
1611	Aged TiO2 PVP	Aged	Elongation factor Tu	GTP binding	Class I
1612	Aged TiO2 PVP	Aged	Elongation factor Tu	GTP binding	Class I
1613	Aged TiO2 PVP	Aged	Elongation factor Tu	GTP binding	Class I
1251	Aged TiO2 PVP	Aged	Elongation factor Tu	GTP binding	Class V
499	Aged TiO2 PVP	Aged	Elongation factor Tu	GTP binding	HH combo
1614	Aged TiO2 PVP	Aged	Eukaryotic initiation factor 4A-II	ATP binding	Class I
1615	Aged TiO2 PVP	Aged	Eukaryotic initiation factor 4A-II	ATP binding	Class I
1252	Aged TiO2 PVP	Aged	Eukaryotic initiation factor 4A-II	ATP binding	Class V
500	Aged TiO2 PVP	Aged	Eukaryotic initiation factor 4A-II	ATP binding	HH combo
1616	Aged TiO2 PVP	Aged	Fructose-bisphosphate aldolase	Fructose-bisphosphate aldolase activity	Class I
1253	Aged TiO2 PVP	Aged	Fructose-bisphosphate aldolase	Fructose-bisphosphate aldolase activity	Class V
1254	Aged TiO2 PVP	Aged	Glutamine synthetase	ATP binding	Class V
501	Aged TiO2 PVP	Aged	Glutamine synthetase	Nitrogen compound metabolic process	HH combo
1255	Aged TiO2 PVP	Aged	Gly d 3	Serine-type endopeptidase activity	Class V
494	Aged TiO2 PVP	Aged	Gly d 3	Serine-type endopeptidase activity	HH combo
1617	Aged TiO2 PVP	Aged	Glyceraldehyde-3-phosphate dehydrogenase	NAD binding	Class I
1256	Aged TiO2 PVP	Aged	Glyceraldehyde-3-phosphate dehydrogenase	Glyceraldehyde-3-phosphate dehydrogenase (NAD+) (phosphorylating) activity	Class V
502	Aged TiO2 PVP	Aged	Glyceraldehyde-3-phosphate dehydrogenase	Glucose metabolic process	HH combo
1618	Aged TiO2 PVP	Aged	GTP-binding nuclear protein	GTP binding	Class I
1257	Aged TiO2 PVP	Aged	GTP-binding nuclear protein	GTP binding	Class V
1619	Aged TiO2 PVP	Aged	GTP-binding protein SAR1a	GTP binding	Class I
1620	Aged TiO2 PVP	Aged	Guanine nucleotide-binding protein subunit beta-2 1	Unreviewed	Class I
503	Aged TiO2 PVP	Aged	Guanylate cyclase	Response to low Ca levels	HH combo
1621	Aged TiO2 PVP	Aged	Heat shock 70 kDa protein cognate	ATP binding	Class I
1622	Aged TiO2 PVP	Aged	Heat shock 70 kDa protein cognate	ATP binding	Class I
1623	Aged TiO2 PVP	Aged	Heat shock 70 kDa protein cognate	ATP binding	Class I
1624	Aged TiO2 PVP	Aged	Heat shock 70 kDa protein cognate	ATP binding	Class I
1258	Aged TiO2 PVP	Aged	Heat shock 70 kDa protein cognate	ATP binding	Class V
1625	Aged TiO2 PVP	Aged	Heat shock protein HSP 90-alpha	ATP binding	Class I
504	Aged TiO2 PVP	Aged	Heat shock protein HSP 90-alpha	ATP binding	HH combo
1259	Aged TiO2 PVP	Aged	Helicase c-terminal domain containing protein	ATP binding	Class V
1260	Aged TiO2 PVP	Aged	Helicase c-terminal domain containing protein	ATP binding	Class V
1626	Aged TiO2 PVP	Aged	Histone H1.3	DNA binding	Class I
1627	Aged TiO2 PVP	Aged	Histone H2A	DNA binding	Class I
1628	Aged TiO2 PVP	Aged	Histone H2A	DNA binding	Class I
1261	Aged TiO2 PVP	Aged	Histone H2A	DNA binding	Class V
1262	Aged TiO2 PVP	Aged	Histone H2A	DNA binding	Class V
1629	Aged TiO2 PVP	Aged	Histone H2B	DNA binding	Class I
1630	Aged TiO2 PVP	Aged	Histone H3.2	DNA binding	Class I
1263	Aged TiO2 PVP	Aged	Histone H3.2	DNA binding	Class V
1631	Aged TiO2 PVP	Aged	Histone H4	DNA binding	Class I
1264	Aged TiO2 PVP	Aged	Histone H4	DNA binding	Class V
505	Aged TiO2 PVP	Aged	Histone H4	DNA binding	HH combo
1265	Aged TiO2 PVP	Aged	Isocitrate dehydrogenase [NADP]	Isocitrate dehydrogenase (NADP+) activity	Class V
1266	Aged TiO2 PVP	Aged	isocitrate dehydrogenase [NADP]	Isocitrate dehydrogenase (NADP+) activity	Class V
506	Aged TiO2 PVP	Aged	Isocitrate dehydrogenase [NADP]	Mg ion binding	HH combo
1632	Aged TiO2 PVP	Aged	Malate dehydrogenase	L-malate dehydrogenase activity	Class I
507	Aged TiO2 PVP	Aged	Matrix metalloproteinase 1	Apoptosis	HH combo
1633	Aged TiO2 PVP	Aged	NADH dehydrogenase [ubiquinone] iron-sulfur protein 3, mitochondrial	NADH dehydrogenase (ubiquinone) activity	Class I
1634	Aged TiO2 PVP	Aged	Nascent polypeptide-associated complex subunit alpha, muscle-specific form	Unreviewed	Class I
1635	Aged TiO2 PVP	Aged	NHP2 non-histone chromosome protein 2	RNA binding	Class I
1267	Aged TiO2 PVP	Aged	Niemann-Pick type C-2d	Integral component of membrane	Class V
508	Aged TiO2 PVP	Aged	Niemann-Pick type C-2d	Sterol binding	HH combo
1636	Aged TiO2 PVP	Aged	Peptidyl-prolyl cis-trans isomerase	Peptidyl-prolyl cis-trans isomerase activity	Class I
1268	Aged TiO2 PVP	Aged	Peptidyl-prolyl cis-trans isomerase	RNA binding	Class V
1637	Aged TiO2 PVP	Aged	Polyadenylate-binding protein	RNA binding	Class I
1638	Aged TiO2 PVP	Aged	Polyubiquitin-C	Unreviewed	Class I
1269	Aged TiO2 PVP	Aged	Polyubiquitin-C	Structural constituent of ribosome	Class V
1639	Aged TiO2 PVP	Aged	PrkA family serine protein kinase	Protein kinase activity	Class I
1640	Aged TiO2 PVP	Aged	Prohibitin-2	Unreviewed	Class I
509	Aged TiO2 PVP	Aged	Protein FAM98A	RNA binding	HH combo
1641	Aged TiO2 PVP	Aged	Putative 40S ribosomal protein	Structural constituent of ribosome	Class I
1642	Aged TiO2 PVP	Aged	Putative 40S ribosomal protein	RNA binding	Class I
510	Aged TiO2 PVP	Aged	Putative 40S ribosomal protein	RNA binding	HH combo
511	Aged TiO2 PVP	Aged	Putative 40S ribosomal protein	RNA binding	HH combo
1270	Aged TiO2 PVP	Aged	Putative 40S ribosomal protein S14	Structural constituent of ribosome	Class V
1643	Aged TiO2 PVP	Aged	Putative Adenosylhomocysteinase adohcyaseec hydrolase	Adenosylhomocysteinase activity	Class I
512	Aged TiO2 PVP	Aged	Putative ATP synthase subunit alpha	ATP binding	HH combo
1644	Aged TiO2 PVP	Aged	Putative Elongation factor 1-alpha	GTP binding	Class I
1271	Aged TiO2 PVP	Aged	Putative Elongation factor 1-alpha	GTP binding	Class V
513	Aged TiO2 PVP	Aged	Putative Elongation factor 1-alpha	GTP binding	HH combo
1645	Aged TiO2 PVP	Aged	Putative Heat shock 70 kDa protein cognate	ATP binding	Class I
1646	Aged TiO2 PVP	Aged	Putative Ras-related protein Rab-34	GTP binding	Class I
514	Aged TiO2 PVP	Aged	Putative Tubulin alpha-1 chain	GTP binding	HH combo
515	Aged TiO2 PVP	Aged	Rab GTPase-activating protein	Tubulin binding	HH combo
1647	Aged TiO2 PVP	Aged	Ras-related protein Rab-11B	GTP binding	Class I
516	Aged TiO2 PVP	Aged	Ras-related protein Rab-11B	GTP binding	HH combo
517	Aged TiO2 PVP	Aged	Ras-related protein Rab-7a	GTP binding	HH combo
1648	Aged TiO2 PVP	Aged	Ras-related protein Rab-8B	GTP binding	Class I
1649	Aged TiO2 PVP	Aged	Ribosomal protein L15	Structural constituent of ribosome	Class I
518	Aged TiO2 PVP	Aged	Ribosome-releasing factor 2	RNA binding	HH combo
1272	Aged TiO2 PVP	Aged	S-adenosylmethionine synthase	ATP binding	Class V
519	Aged TiO2 PVP	Aged	S-adenosylmethionine synthase	ATP binding	HH combo
520	Aged TiO2 PVP	Aged	Small nuclear ribonucleoprotein-associated protein B	Unreviewed	HH combo
1273	Aged TiO2 PVP	Aged	Spbpj4664.02 protein	Integral component of membrane	Class V
1274	Aged TiO2 PVP	Aged	Spz1	Cellular component	Class V
521	Aged TiO2 PVP	Aged	Spz1	Protein coding gene	HH combo
1275	Aged TiO2 PVP	Aged	Trypsin serine protease-like protein	Peptidase activity	Class V
1650	Aged TiO2 PVP	Aged	Tubulin alpha chain	GTP binding	Class I
1651	Aged TiO2 PVP	Aged	Tubulin alpha chain	GTP binding	Class I
1652	Aged TiO2 PVP	Aged	Tubulin alpha chain	GTP binding	Class I
1276	Aged TiO2 PVP	Aged	Tubulin alpha chain	GTP binding	Class V
1277	Aged TiO2 PVP	Aged	Tubulin alpha chain	GTP binding	Class V
522	Aged TiO2 PVP	Aged	Tubulin alpha chain	GTP binding	HH combo
1653	Aged TiO2 PVP	Aged	Tubulin alpha-1 chain	GTP binding	Class I
1654	Aged TiO2 PVP	Aged	Tubulin beta chain	GTP binding	Class I
1655	Aged TiO2 PVP	Aged	Tubulin beta chain	GTP binding	Class I
1656	Aged TiO2 PVP	Aged	Tubulin beta chain	GTP binding	Class I
1278	Aged TiO2 PVP	Aged	Tubulin beta chain	Constituent of microtubule	Class V
1279	Aged TiO2 PVP	Aged	Tubulin beta chain	Constituent of microtubule	Class V
523	Aged TiO2 PVP	Aged	Tubulin beta chain	GTP binding	HH combo
524	Aged TiO2 PVP	Aged	Tubulin beta chain	GTP binding	HH combo
1657	Aged TiO2 PVP	Aged	Uncharacterized protein	Protein-chromophore linkage	Class I
1658	Aged TiO2 PVP	Aged	Uncharacterized protein	Structural constituent of ribosome	Class I
1280	Aged TiO2 PVP	Aged	Uncharacterized protein	Unreviewed	Class V
1281	Aged TiO2 PVP	Aged	Uncharacterized protein	Unreviewed	Class V
1282	Aged TiO2 PVP	Aged	Uncharacterized protein	Unreviewed	Class V
1283	Aged TiO2 PVP	Aged	Uncharacterized protein	Unreviewed	Class V
525	Aged TiO2 PVP	Aged	Uncharacterized protein	Structural constituent of cuticle	HH combo
526	Aged TiO2 PVP	Aged	Uncharacterized protein	Structural constituent of cuticle	HH combo
527	Aged TiO2 PVP	Aged	Uncharacterized protein	Protein-chromophore linkage	HH combo
528	Aged TiO2 PVP	Aged	Uncharacterized protein	Structural constituent of cuticle	HH combo
529	Aged TiO2 PVP	Aged	Uncharacterized protein	Structural constituent of cuticle	HH combo
530	Aged TiO2 PVP	Aged	Uncharacterized protein	Structural constituent of cuticle	HH combo
531	Aged TiO2 PVP	Aged	Uncharacterized protein	Receptor activity	HH combo
532	Aged TiO2 PVP	Aged	Uncharacterized protein	Structural constituent of cuticle	HH combo
533	Aged TiO2 PVP	Aged	Uncharacterized protein	Unreviewed	HH combo
1659	Aged TiO2 PVP	Aged	V-type proton ATPase catalytic subunit A	ATP binding	Class I
1714	Aged TiO2 Uncoated	Aged	116 kDa U5 small nuclear ribonucleoprotein component protein	GTP binding	Class I
1715	Aged TiO2 Uncoated	Aged	116 kDa U5 small nuclear ribonucleoprotein component protein	GTP binding	Class I
1716	Aged TiO2 Uncoated	Aged	116 kDa U5 small nuclear ribonucleoprotein component protein	GTP binding	Class I
1717	Aged TiO2 Uncoated	Aged	14-3-3 protein epsilon	Protein domain specific binding	Class I
1718	Aged TiO2 Uncoated	Aged	26S protease regulatory subunit	ATP binding	Class I
1719	Aged TiO2 Uncoated	Aged	40S ribosomal protein	Structural constituent of ribosome	Class I
1720	Aged TiO2 Uncoated	Aged	40S ribosomal protein	Structural constituent of ribosome	Class I
1721	Aged TiO2 Uncoated	Aged	40S ribosomal protein	Structural constituent of ribosome	Class I
1469	Aged TiO2 Uncoated	Aged	40S ribosomal protein	Structural constituent of ribosome	Class V
1470	Aged TiO2 Uncoated	Aged	40S ribosomal protein	RNA binding	Class V
1471	Aged TiO2 Uncoated	Aged	40S ribosomal protein	Structural constituent of ribosome	Class V
1472	Aged TiO2 Uncoated	Aged	40S ribosomal protein	Structural constituent of ribosome	Class V
758	Aged TiO2 Uncoated	Aged	40S ribosomal protein	Translation	HH combo
1722	Aged TiO2 Uncoated	Aged	50s ribosomal protein	Structural constituent of ribosome	Class I
1473	Aged TiO2 Uncoated	Aged	50s ribosomal protein	Unreviewed	Class V
1723	Aged TiO2 Uncoated	Aged	60S ribosomal protein	Structural constituent of ribosome	Class I
1724	Aged TiO2 Uncoated	Aged	60S ribosomal protein	Structural constituent of ribosome	Class I
1725	Aged TiO2 Uncoated	Aged	60S ribosomal protein	Structural constituent of ribosome	Class I
1474	Aged TiO2 Uncoated	Aged	60S ribosomal protein	Unreviewed	Class V
1475	Aged TiO2 Uncoated	Aged	60S ribosomal protein	Structural constituent of ribosome	Class V
1726	Aged TiO2 Uncoated	Aged	Actin, alpha skeletal muscle	ATP binding	Class I
1476	Aged TiO2 Uncoated	Aged	Actin, alpha skeletal muscle	ATP binding	Class V
1477	Aged TiO2 Uncoated	Aged	Actin, alpha skeletal muscle	ATP binding	Class V
1478	Aged TiO2 Uncoated	Aged	Actin, alpha skeletal muscle	ATP binding	Class V
1479	Aged TiO2 Uncoated	Aged	Actin, alpha skeletal muscle	Unreviewed	Class V
1727	Aged TiO2 Uncoated	Aged	ADP-ribosylation factor	GTP binding	Class I
1480	Aged TiO2 Uncoated	Aged	Alpha-1,4 glucan phosphorylase	Glycogen phosphorylase activity	Class V
1728	Aged TiO2 Uncoated	Aged	Alpha-enolase	Magnesium ion binding	Class I
1481	Aged TiO2 Uncoated	Aged	Alpha-enolase-like protein	Magnesium ion binding	Class V
1729	Aged TiO2 Uncoated	Aged	Argininosuccinate lyase	Argininosuccinate lyase activity	Class I
1730	Aged TiO2 Uncoated	Aged	ATP synthase subunit alpha	ATP binding	Class I
1731	Aged TiO2 Uncoated	Aged	ATP synthase subunit alpha	ATP binding	Class I
1482	Aged TiO2 Uncoated	Aged	ATP synthase subunit alpha	ATP binding	Class V
1732	Aged TiO2 Uncoated	Aged	ATP synthase subunit beta	ATP binding	Class I
1733	Aged TiO2 Uncoated	Aged	ATP synthase subunit beta	ATP binding	Class I
1734	Aged TiO2 Uncoated	Aged	ATP synthase subunit beta	ATP binding	Class I
1735	Aged TiO2 Uncoated	Aged	ATP synthase subunit beta	ATP binding	Class I
1483	Aged TiO2 Uncoated	Aged	ATP synthase subunit beta	ATP binding	Class V
1484	Aged TiO2 Uncoated	Aged	ATP synthase subunit beta	ATP binding	Class V
1485	Aged TiO2 Uncoated	Aged	ATP synthase subunit beta	ATP binding	Class V
753	Aged TiO2 Uncoated	Aged	ATP synthase subunit beta	ATP binding	HH combo
1736	Aged TiO2 Uncoated	Aged	ATP-dependent RNA helicase DDX39A	ATP binding	Class I
1737	Aged TiO2 Uncoated	Aged	ATP-dependent zinc metalloprotease YME1L1	ATP binding	Class I
1486	Aged TiO2 Uncoated	Aged	ATP-dependent zinc metalloprotease YME1L1	ATP binding	Class V
1487	Aged TiO2 Uncoated	Aged	Calcium-transporting ATPase	ATP binding	Class V
1488	Aged TiO2 Uncoated	Aged	Calcium-transporting ATPase	Nucleotide binding	Class V
1738	Aged TiO2 Uncoated	Aged	Calmodulin	Calcium ion binding	Class I
1739	Aged TiO2 Uncoated	Aged	Carbamoyl-phosphate synthase large chain	ATP binding	Class I
1489	Aged TiO2 Uncoated	Aged	Carbamoyl-phosphate synthase large chain	ATP binding	Class V
1740	Aged TiO2 Uncoated	Aged	Chaperone protein ClpB	ATP binding	Class I
754	Aged TiO2 Uncoated	Aged	Chaperone protein ClpB	ATP binding	HH combo
1741	Aged TiO2 Uncoated	Aged	Chemosensory protein 13	Unreviewed	Class I
1490	Aged TiO2 Uncoated	Aged	Chemosensory protein 13	Unreviewed	Class V
1742	Aged TiO2 Uncoated	Aged	Chorion peroxidase	Heme binding	Class I
1491	Aged TiO2 Uncoated	Aged	Chorion peroxidase	Heme binding	Class V
1492	Aged TiO2 Uncoated	Aged	Chymotrypsin BI	Serine-type endopeptidase activity	Class V
1493	Aged TiO2 Uncoated	Aged	Clip-domain serine protease	Serine-type endopeptidase activity	Class V
1743	Aged TiO2 Uncoated	Aged	Coatomer subunit gamma	Structural molecule activity	Class I
1744	Aged TiO2 Uncoated	Aged	Collagen alpha-5(VI) chain	Unreviewed	Class I
1494	Aged TiO2 Uncoated	Aged	Collagen alpha-5(VI) chain/sw-like protein	Unreviewed	Class V
1495	Aged TiO2 Uncoated	Aged	Copper-zinc cu-zn superoxide dismutase	Lipid transporter activity	Class V
1496	Aged TiO2 Uncoated	Aged	Copper-zinc cu-zn superoxide dismutase	Lipid transporter activity	Class V
1497	Aged TiO2 Uncoated	Aged	C-type lectin ctl-galactose binding	Carbohydrate binding	Class V
1498	Aged TiO2 Uncoated	Aged	Cuticle protein	Structural constituent of cuticle	Class V
1503	Aged TiO2 Uncoated	Aged	Cuticular protein	Structural constituent of cuticle	Class V
1499	Aged TiO2 Uncoated	Aged	Cuticular protein 49Ag	Structural constituent of cuticle	Class V
1500	Aged TiO2 Uncoated	Aged	Cuticular protein analogous to peritrophins 1	Chitin binding	Class V
1745	Aged TiO2 Uncoated	Aged	Cuticular protein analogous to peritrophins 3	Chitin binding	Class I
1746	Aged TiO2 Uncoated	Aged	Cuticular protein analogous to peritrophins 3	Chitin binding	Class I
1501	Aged TiO2 Uncoated	Aged	Cuticular protein analogous to peritrophins 3	Chitin binding	Class V
1502	Aged TiO2 Uncoated	Aged	Cuticular protein analogous to peritrophins 3	Chitin binding	Class V
1504	Aged TiO2 Uncoated	Aged	Cytoplasmatic actin	Unreviewed	Class V
1747	Aged TiO2 Uncoated	Aged	Developmentally-regulated GTP-binding protein 1	GTP binding	Class I
759	Aged TiO2 Uncoated	Aged	Dihydrolipoyllysine-residue succinyltransferase component of 2-oxoglutarate dehydrogenase complex	Tricarboxylic acid cycle	HH combo
1505	Aged TiO2 Uncoated	Aged	Double oxidase: two peroxidase domains	Heme binding	Class V
1506	Aged TiO2 Uncoated	Aged	Double oxidase: two peroxidase domains	Heme binding	Class V
1507	Aged TiO2 Uncoated	Aged	Double oxidase: two peroxidase domains	Heme binding	Class V
1748	Aged TiO2 Uncoated	Aged	Elongation factor 1-alpha	GTP binding	Class I
1508	Aged TiO2 Uncoated	Aged	Elongation factor 1-alpha	GTP binding	Class V
1749	Aged TiO2 Uncoated	Aged	Elongation factor Tu	GTP binding	Class I
1509	Aged TiO2 Uncoated	Aged	Elongation factor Tu	GTP binding	Class V
1510	Aged TiO2 Uncoated	Aged	Endocuticle structural glycoprotein	Structural constituent of cuticle	Class V
1750	Aged TiO2 Uncoated	Aged	Endocuticle structural glycoprotein SgAbd-2	Structural constituent of cuticle	Class I
1511	Aged TiO2 Uncoated	Aged	Endocuticle structural glycoprotein SgAbd-2	Structural constituent of cuticle	Class V
1512	Aged TiO2 Uncoated	Aged	Endocuticle structural glycoprotein SgAbd-2	Structural constituent of cuticle	Class V
1513	Aged TiO2 Uncoated	Aged	Endocuticle structural glycoprotein SgAbd-2	Structural constituent of cuticle	Class V
1751	Aged TiO2 Uncoated	Aged	Eukaryotic initiation factor 4A-II	ATP binding	Class I
1752	Aged TiO2 Uncoated	Aged	Eukaryotic initiation factor 4A-II	ATP binding	Class I
1753	Aged TiO2 Uncoated	Aged	Eukaryotic initiation factor 4A-II	ATP binding	Class I
1514	Aged TiO2 Uncoated	Aged	Eukaryotic initiation factor 4A-II	ATP binding	Class V
1515	Aged TiO2 Uncoated	Aged	Ferric-chelate reductase	Unreviewed	Class V
1754	Aged TiO2 Uncoated	Aged	Fructose-bisphosphate aldolase	Fructose-bisphosphate aldolase activity	Class I
1755	Aged TiO2 Uncoated	Aged	Fructose-bisphosphate aldolase	Fructose-bisphosphate aldolase activity	Class I
1516	Aged TiO2 Uncoated	Aged	Fructose-bisphosphate aldolase	Fructose-bisphosphate aldolase activity	Class V
1756	Aged TiO2 Uncoated	Aged	Glutamine synthetase	Glutamate-ammonia ligase activity	Class I
1517	Aged TiO2 Uncoated	Aged	Glutamine synthetase	Glutamate-ammonia ligase activity	Class V
1518	Aged TiO2 Uncoated	Aged	Gly d 3	Serine-type endopeptidase activity	Class V
1757	Aged TiO2 Uncoated	Aged	Glyceraldehyde-3-phosphate dehydrogenase	NAD binding	Class I
1519	Aged TiO2 Uncoated	Aged	Glyceraldehyde-3-phosphate dehydrogenase	NAD binding	Class V
1520	Aged TiO2 Uncoated	Aged	Glyceraldehyde-3-phosphate dehydrogenase	NAD binding	Class V
1521	Aged TiO2 Uncoated	Aged	GTP-binding nuclear protein	GTP binding	Class V
1758	Aged TiO2 Uncoated	Aged	GTP-binding protein SAR1a	GTP binding	Class I
1522	Aged TiO2 Uncoated	Aged	Guanine nucleotide-binding protein subunit beta-2 1	Unreviewed	Class V
1759	Aged TiO2 Uncoated	Aged	Heat shock 70 kDa cognate-like protein	ATP binding	Class I
1760	Aged TiO2 Uncoated	Aged	Heat shock 70 kDa protein cognate	ATP binding	Class I
1761	Aged TiO2 Uncoated	Aged	Heat shock 70 kDa protein cognate	ATP binding	Class I
1762	Aged TiO2 Uncoated	Aged	Heat shock 70 kDa protein cognate	ATP binding	Class I
1523	Aged TiO2 Uncoated	Aged	Heat shock 70 kDa protein cognate	ATP binding	Class V
1524	Aged TiO2 Uncoated	Aged	Heat shock 70 kDa protein cognate	ATP binding	Class V
1525	Aged TiO2 Uncoated	Aged	Heat shock 70 kDa protein cognate	ATP binding	Class V
1763	Aged TiO2 Uncoated	Aged	Heat shock protein HSP 90-alpha	ATP binding	Class I
1526	Aged TiO2 Uncoated	Aged	Heat shock protein HSP 90-alpha	ATP binding	Class V
1764	Aged TiO2 Uncoated	Aged	Histone H2A	DNA binding	Class I
1765	Aged TiO2 Uncoated	Aged	Histone H2A	DNA binding	Class I
1527	Aged TiO2 Uncoated	Aged	Histone H2A	DNA binding	Class V
1766	Aged TiO2 Uncoated	Aged	Histone H2B	DNA binding	Class I
1767	Aged TiO2 Uncoated	Aged	Histone H3.2	DNA binding	Class I
1528	Aged TiO2 Uncoated	Aged	Histone H3.2	DNA binding	Class V
1768	Aged TiO2 Uncoated	Aged	Histone H4	DNA binding	Class I
1529	Aged TiO2 Uncoated	Aged	Histone H4	DNA binding	Class V
755	Aged TiO2 Uncoated	Aged	Histone H4	DNA binding	HH combo
1769	Aged TiO2 Uncoated	Aged	Isocitrate lyase	Isocitrate lyase activity	Class I
1530	Aged TiO2 Uncoated	Aged	Lethal(3)malignant blood neoplasm	Structural constituent of cuticle	Class V
1770	Aged TiO2 Uncoated	Aged	Lysine-specific histone demethylase 1A	DNA binding	Class I
1771	Aged TiO2 Uncoated	Aged	Malate dehydrogenase	L-malate dehydrogenase activity	Class I
764	Aged TiO2 Uncoated	Aged	Malate dehydrogenase	L-malate dehydrogenase activity	HH combo
1772	Aged TiO2 Uncoated	Aged	Matrix metalloproteinase 1	Metalloendopeptidase activity	Class I
1531	Aged TiO2 Uncoated	Aged	Matrix metalloproteinase 1	Metalloendopeptidase activity	Class V
1532	Aged TiO2 Uncoated	Aged	Myosin-2 essential light chain	Structural constituent of cuticle	Class V
1773	Aged TiO2 Uncoated	Aged	NAD(P) transhydrogenase	NAD(P)+ transhydrogenase activity	Class I
1774	Aged TiO2 Uncoated	Aged	Peptidyl-prolyl cis-trans isomerase	Peptidyl-prolyl cis-trans isomerase activity	Class I
756	Aged TiO2 Uncoated	Aged	Peroxisome biogenesis factor	Peroxisome biogenesis factor	HH combo
1775	Aged TiO2 Uncoated	Aged	Polyadenylate-binding protein	RNA binding	Class I
1776	Aged TiO2 Uncoated	Aged	Polyubiquitin-C	Unreviewed	Class I
1533	Aged TiO2 Uncoated	Aged	Pupal cuticle protein	Structural constituent of cuticle	Class V
1777	Aged TiO2 Uncoated	Aged	Putative 40S ribosomal protein	Structural constituent of ribosome	Class I
1778	Aged TiO2 Uncoated	Aged	Putative 40S ribosomal protein	RNA binding	Class I
1534	Aged TiO2 Uncoated	Aged	Putative 40S ribosomal protein	Structural constituent of cuticle	Class V
1535	Aged TiO2 Uncoated	Aged	Putative 60 kDa heat shock protein	ATP binding	Class V
1536	Aged TiO2 Uncoated	Aged	Putative Alpha-enolase	Structural constituent of cuticle	Class V
1537	Aged TiO2 Uncoated	Aged	Putative Ccp84Ae	GTP binding	Class V
1779	Aged TiO2 Uncoated	Aged	Putative Elongation factor 1-alpha	GTP binding	Class I
1538	Aged TiO2 Uncoated	Aged	Putative Elongation factor 1-alpha	GTP binding	Class V
1539	Aged TiO2 Uncoated	Aged	Putative Eukaryotic translation initiation factor 3 subunit D	Chitin binding	Class V
1780	Aged TiO2 Uncoated	Aged	Putative Heat shock 70 kDa protein cognate	ATP binding	Class I
1781	Aged TiO2 Uncoated	Aged	Putative Nucleolar kke/d repeat protein	Unreviewed	Class I
1540	Aged TiO2 Uncoated	Aged	Putative Pollen-specific leucine-rich repeat extensin protein 1	Structural constituent of cuticle	Class V
1541	Aged TiO2 Uncoated	Aged	Putative Polyubiquitin-C	Unreviewed	Class V
1542	Aged TiO2 Uncoated	Aged	Putative Pupal cuticle protein	Structural constituent of cuticle	Class V
1782	Aged TiO2 Uncoated	Aged	Putative Serine protease inhibitor	Serine-type endopeptidase inhibitor activity	Class I
1783	Aged TiO2 Uncoated	Aged	Ras-related protein Rab	GTP binding	Class I
1784	Aged TiO2 Uncoated	Aged	Ras-related protein Rab	GTP binding	Class I
1785	Aged TiO2 Uncoated	Aged	Ras-related protein Rab	GTP binding	Class I
1786	Aged TiO2 Uncoated	Aged	S-adenosylmethionine synthase	ATP binding	Class I
763	Aged TiO2 Uncoated	Aged	Scp extracellular protein	Golgi-associated pathogenesis	HH combo
1543	Aged TiO2 Uncoated	Aged	Serine protease inhibitor	Peptidase activity	Class V
1544	Aged TiO2 Uncoated	Aged	Serine protease P76	Serine-type endopeptidase activity	Class V
1787	Aged TiO2 Uncoated	Aged	Small nuclear ribonucleoprotein-associated protein B	Unreviewed	Class I
1788	Aged TiO2 Uncoated	Aged	Succinate dehydrogenase [ubiquinone] flavoprotein subunit	Oxidoreductase activity	Class I
1789	Aged TiO2 Uncoated	Aged	Succinate dehydrogenase [ubiquinone] flavoprotein subunit	Oxidoreductase activity	Class I
1790	Aged TiO2 Uncoated	Aged	Succinyl-CoA ligase [ADP/GDP-forming] subunit alpha	Cofactor binding	Class I
1791	Aged TiO2 Uncoated	Aged	Thioredoxin domain-containing protein	Cell redox homeostasis	Class I
1792	Aged TiO2 Uncoated	Aged	Tubulin alpha chain	GTP binding	Class I
1793	Aged TiO2 Uncoated	Aged	Tubulin alpha chain	GTP binding	Class I
1794	Aged TiO2 Uncoated	Aged	Tubulin alpha chain	GTP binding	Class I
1795	Aged TiO2 Uncoated	Aged	Tubulin alpha chain	GTP binding	Class I
1796	Aged TiO2 Uncoated	Aged	Tubulin beta chain	GTP binding	Class I
1797	Aged TiO2 Uncoated	Aged	Tubulin beta chain	GTP binding	Class I
1545	Aged TiO2 Uncoated	Aged	Tubulin beta chain	GTP binding	Class V
1546	Aged TiO2 Uncoated	Aged	Tubulin beta chain	GTP binding	Class V
1547	Aged TiO2 Uncoated	Aged	Tubulin beta chain	GTP binding	Class V
1798	Aged TiO2 Uncoated	Aged	Uncharacterized protein	Structural constituent of cuticle	Class I
1799	Aged TiO2 Uncoated	Aged	Uncharacterized protein	Protein-chromophore linkage	Class I
1800	Aged TiO2 Uncoated	Aged	Uncharacterized protein	Unreviewed	Class I
1801	Aged TiO2 Uncoated	Aged	Uncharacterized protein	Unreviewed	Class I
1802	Aged TiO2 Uncoated	Aged	Uncharacterized protein	Structural constituent of cuticle	Class I
1803	Aged TiO2 Uncoated	Aged	Uncharacterized protein	Structural constituent of cuticle	Class I
1804	Aged TiO2 Uncoated	Aged	Uncharacterized protein	Structural constituent of cuticle	Class I
1805	Aged TiO2 Uncoated	Aged	Uncharacterized protein	Unreviewed	Class I
1806	Aged TiO2 Uncoated	Aged	Uncharacterized protein	Structural constituent of cuticle	Class I
1807	Aged TiO2 Uncoated	Aged	Uncharacterized protein	Structural constituent of cuticle	Class I
1808	Aged TiO2 Uncoated	Aged	Uncharacterized protein	Structural constituent of cuticle	Class I
1809	Aged TiO2 Uncoated	Aged	Uncharacterized protein	Unreviewed	Class I
1810	Aged TiO2 Uncoated	Aged	Uncharacterized protein	Unreviewed	Class I
1811	Aged TiO2 Uncoated	Aged	Uncharacterized protein	Unreviewed	Class I
1812	Aged TiO2 Uncoated	Aged	Uncharacterized protein	Structural constituent of cuticle	Class I
1813	Aged TiO2 Uncoated	Aged	Uncharacterized protein	ATP binding	Class I
1548	Aged TiO2 Uncoated	Aged	Uncharacterized protein	Structural constituent of cuticle	Class V
1549	Aged TiO2 Uncoated	Aged	Uncharacterized protein	Unreviewed	Class V
1550	Aged TiO2 Uncoated	Aged	Uncharacterized protein	Structural constituent of cuticle	Class V
1551	Aged TiO2 Uncoated	Aged	Uncharacterized protein	Structural constituent of cuticle	Class V
1552	Aged TiO2 Uncoated	Aged	Uncharacterized protein	Unreviewed	Class V
1553	Aged TiO2 Uncoated	Aged	Uncharacterized protein	Protein-chromophore linkage	Class V
1554	Aged TiO2 Uncoated	Aged	Uncharacterized protein	Structural constituent of cuticle	Class V
1555	Aged TiO2 Uncoated	Aged	Uncharacterized protein	Unreviewed	Class V
1556	Aged TiO2 Uncoated	Aged	Uncharacterized protein	Structural molecule activity	Class V
1557	Aged TiO2 Uncoated	Aged	Uncharacterized protein	Unreviewed	Class V
1558	Aged TiO2 Uncoated	Aged	Uncharacterized protein	Structural constituent of cuticle	Class V
1559	Aged TiO2 Uncoated	Aged	Uncharacterized protein	Structural constituent of cuticle	Class V
1560	Aged TiO2 Uncoated	Aged	Uncharacterized protein	Structural constituent of cuticle	Class V
1561	Aged TiO2 Uncoated	Aged	Uncharacterized protein	Structural constituent of cuticle	Class V
1562	Aged TiO2 Uncoated	Aged	Uncharacterized protein	Structural constituent of cuticle	Class V
1563	Aged TiO2 Uncoated	Aged	Uncharacterized protein	Structural constituent of cuticle	Class V
1564	Aged TiO2 Uncoated	Aged	Uncharacterized protein	Structural constituent of cuticle	Class V
1565	Aged TiO2 Uncoated	Aged	Uncharacterized protein	Structural constituent of cuticle	Class V
1566	Aged TiO2 Uncoated	Aged	Uncharacterized protein	Structural constituent of ribosome	Class V
1567	Aged TiO2 Uncoated	Aged	Uncharacterized protein	Unreviewed	Class V
1568	Aged TiO2 Uncoated	Aged	Uncharacterized protein	Unreviewed	Class V
1569	Aged TiO2 Uncoated	Aged	Uncharacterized protein	Chitin binding	Class V
1570	Aged TiO2 Uncoated	Aged	Uncharacterized protein	Chitin binding	Class V
1571	Aged TiO2 Uncoated	Aged	Uncharacterized protein	Unreviewed	Class V
1572	Aged TiO2 Uncoated	Aged	Uncharacterized protein	Structural constituent of cuticle	Class V
1573	Aged TiO2 Uncoated	Aged	Uncharacterized protein	Unreviewed	Class V
1574	Aged TiO2 Uncoated	Aged	Uncharacterized protein	Structural constituent of cuticle	Class V
757	Aged TiO2 Uncoated	Aged	Uncharacterized protein	DNA binding	HH combo
760	Aged TiO2 Uncoated	Aged	Uncharacterized protein	Unreviewed	HH combo
761	Aged TiO2 Uncoated	Aged	Uncharacterized protein	Unreviewed	HH combo
762	Aged TiO2 Uncoated	Aged	Uncharacterized protein	Unreviewed	HH combo
1575	Aged TiO2 Uncoated	Aged	Vitellogenin-1	Lipid transporter activity	Class V
1576	Aged TiO2 Uncoated	Aged	Vitellogenin-1	Lipid transporter activity	Class V
1814	Aged TiO2 Uncoated	Aged	V-type proton ATPase catalytic subunit A	ATP binding	Class I
1815	Aged Uncoated Ag	Aged	116 kDa U5 small nuclear ribonucleoprotein component protein	GTP binding	Class I
1816	Aged Uncoated Ag	Aged	116 kDa U5 small nuclear ribonucleoprotein component protein	GTP binding	Class I
1817	Aged Uncoated Ag	Aged	116 kDa U5 small nuclear ribonucleoprotein component protein	GTP binding	Class I
1365	Aged Uncoated Ag	Aged	116 kDa U5 small nuclear ribonucleoprotein component protein	Unreviewed	Class V
660	Aged Uncoated Ag	Aged	116 kDa U5 small nuclear ribonucleoprotein component protein	GTP binding	HH combo
1818	Aged Uncoated Ag	Aged	26S protease regulatory subunit	ATP binding	Class I
1366	Aged Uncoated Ag	Aged	30S ribosomal protein	GTP binding	Class V
661	Aged Uncoated Ag	Aged	3-hydroxyacyl-[acyl-carrier-protein] dehydratase FabZ	3-hydroxyoctanoyl-[acyl-carrier-protein] dehydratase activity	HH combo
1819	Aged Uncoated Ag	Aged	40S ribosomal protein	Structural constituent of ribosome	Class I
1820	Aged Uncoated Ag	Aged	40S ribosomal protein	Structural constituent of ribosome	Class I
1821	Aged Uncoated Ag	Aged	40S ribosomal protein	Structural constituent of ribosome	Class I
1822	Aged Uncoated Ag	Aged	40S ribosomal protein	Structural constituent of ribosome	Class I
1367	Aged Uncoated Ag	Aged	40S ribosomal protein	Structural constituent of cuticle	Class V
662	Aged Uncoated Ag	Aged	40S ribosomal protein	Structural constituent of ribosome	HH combo
663	Aged Uncoated Ag	Aged	40S ribosomal protein	Structural constituent of ribosome	HH combo
664	Aged Uncoated Ag	Aged	40S ribosomal protein	RNA binding	HH combo
665	Aged Uncoated Ag	Aged	40S ribosomal protein	RNA binding	HH combo
1368	Aged Uncoated Ag	Aged	60 kDa chaperonin	Structural constituent of cuticle	Class V
1823	Aged Uncoated Ag	Aged	60S ribosomal protein	Structural constituent of ribosome	Class I
1824	Aged Uncoated Ag	Aged	60S ribosomal protein	Structural constituent of ribosome	Class I
1825	Aged Uncoated Ag	Aged	60S ribosomal protein	Structural constituent of ribosome	Class I
1826	Aged Uncoated Ag	Aged	60S ribosomal protein	Structural constituent of ribosome	Class I
1827	Aged Uncoated Ag	Aged	60S ribosomal protein	Actin family	Class I
1369	Aged Uncoated Ag	Aged	60S ribosomal protein	GTP binding	Class V
1370	Aged Uncoated Ag	Aged	60S ribosomal protein	Serine-type endopeptidase activity	Class V
666	Aged Uncoated Ag	Aged	60S ribosomal protein	Unreviewed	HH combo
667	Aged Uncoated Ag	Aged	60S ribosomal protein	Structural constituent of ribosome	HH combo
668	Aged Uncoated Ag	Aged	60S ribosomal protein	Structural constituent of ribosome	HH combo
1371	Aged Uncoated Ag	Aged	Actin, alpha skeletal muscle	Structural molecule activity	Class V
1372	Aged Uncoated Ag	Aged	Actin, alpha skeletal muscle	Structural constituent of cuticle	Class V
1373	Aged Uncoated Ag	Aged	Actin, alpha skeletal muscle	RNA binding	Class V
669	Aged Uncoated Ag	Aged	Actin, alpha skeletal muscle	ATP binding	HH combo
1374	Aged Uncoated Ag	Aged	Adenosine deaminase	Structural constituent of ribosome	Class V
1828	Aged Uncoated Ag	Aged	ADP-ribosylation factor	GTP binding	Class I
1375	Aged Uncoated Ag	Aged	ADP-ribosylation factor	ATP binding	Class V
670	Aged Uncoated Ag	Aged	ADP-ribosylation factor	GTP binding	HH combo
1829	Aged Uncoated Ag	Aged	ATP synthase subunit alpha	ATP binding	Class I
1376	Aged Uncoated Ag	Aged	ATP synthase subunit alpha	GTP binding	Class V
1377	Aged Uncoated Ag	Aged	ATP synthase subunit alpha	Protein-chromophore linkage	Class V
1378	Aged Uncoated Ag	Aged	ATP synthase subunit alpha	Structural constituent of cuticle	Class V
1379	Aged Uncoated Ag	Aged	ATP synthase subunit alpha	Structural constituent of cuticle	Class V
671	Aged Uncoated Ag	Aged	ATP synthase subunit alpha, mitochondrial	ATP binding	HH combo
1830	Aged Uncoated Ag	Aged	ATP synthase subunit beta	ATP binding	Class I
1831	Aged Uncoated Ag	Aged	ATP synthase subunit beta	ATP binding	Class I
1832	Aged Uncoated Ag	Aged	ATP synthase subunit beta	ATP binding	Class I
1380	Aged Uncoated Ag	Aged	ATP synthase subunit beta	Structural constituent of cuticle	Class V
1381	Aged Uncoated Ag	Aged	ATP synthase subunit beta	Receptor activity	Class V
1382	Aged Uncoated Ag	Aged	ATP synthase subunit beta	Structural constituent of cuticle	Class V
672	Aged Uncoated Ag	Aged	ATP synthase subunit beta	ATP binding	HH combo
1833	Aged Uncoated Ag	Aged	ATP-dependent zinc metalloprotease FtsH	ATP binding	Class I
1834	Aged Uncoated Ag	Aged	ATP-dependent zinc metalloprotease YME1L1	ATP binding	Class I
673	Aged Uncoated Ag	Aged	ATP-dependent zinc metalloprotease YME1L1	ATP binding	HH combo
674	Aged Uncoated Ag	Aged	Calcium-transporting ATPase type 2C member-like protein	Nucleotide binding	HH combo
1835	Aged Uncoated Ag	Aged	Calmodulin	Calcium ion binding	Class I
1383	Aged Uncoated Ag	Aged	Calmodulin	Unreviewed	Class V
675	Aged Uncoated Ag	Aged	Calmodulin	Calcium ion binding	HH combo
1836	Aged Uncoated Ag	Aged	Carbamoyl-phosphate synthase large chain	ATP binding	Class I
1384	Aged Uncoated Ag	Aged	Carbamoyl-phosphate synthase large chain	Structural constituent of cuticle	Class V
676	Aged Uncoated Ag	Aged	Carbamoyl-phosphate synthase large chain	ATP binding	HH combo
1385	Aged Uncoated Ag	Aged	Chemosensory protein 13	Calcium ion binding	Class V
1386	Aged Uncoated Ag	Aged	Chorion peroxidase	Unreviewed	Class V
1387	Aged Uncoated Ag	Aged	Clip-domain serine protease	Unreviewed	Class V
677	Aged Uncoated Ag	Aged	Clip-domain serine protease	Serine-type endopeptidase activity	HH combo
1837	Aged Uncoated Ag	Aged	Coatomer subunit gamma	Structural molecule activity	Class I
1388	Aged Uncoated Ag	Aged	Collagen alpha-5(VI) chain	GTP binding	Class V
1389	Aged Uncoated Ag	Aged	Collagen alpha-5(VI) chain/sw-like protein	Unreviewed	Class V
1390	Aged Uncoated Ag	Aged	Copper-zinc cu-zn superoxide dismutase	Structural constituent of cuticle	Class V
1391	Aged Uncoated Ag	Aged	Cuticle protein (Fragment)	GTP binding	Class V
1392	Aged Uncoated Ag	Aged	Cuticular protein analogous to peritrophins 3	Unreviewed	Class V
1393	Aged Uncoated Ag	Aged	Cuticular protein analogous to peritrophins 3	Unreviewed	Class V
1838	Aged Uncoated Ag	Aged	Developmentally-regulated GTP-binding protein 1	GTP binding	Class I
1394	Aged Uncoated Ag	Aged	DNA-directed RNA polymerase subunit beta	Structural constituent of ribosome	Class V
1395	Aged Uncoated Ag	Aged	DNA-directed RNA polymerase subunit beta	Structural constituent of cuticle	Class V
1839	Aged Uncoated Ag	Aged	Elongation factor 1-alpha	GTP binding	Class I
1396	Aged Uncoated Ag	Aged	Elongation factor 1-alpha	Unreviewed	Class V
678	Aged Uncoated Ag	Aged	Elongation factor 1-alpha	GTP binding	HH combo
1840	Aged Uncoated Ag	Aged	Elongation factor Tu	GTP binding	Class I
1841	Aged Uncoated Ag	Aged	Elongation factor Tu	GTP binding	Class I
1397	Aged Uncoated Ag	Aged	Elongation factor Tu	GTP binding	Class V
679	Aged Uncoated Ag	Aged	Elongation factor Tu	GTP binding	HH combo
680	Aged Uncoated Ag	Aged	Elongation factor Tu	GTP binding	HH combo
1842	Aged Uncoated Ag	Aged	Embryonic polyadenylate-binding-like protein	RNA binding	Class I
1843	Aged Uncoated Ag	Aged	Eukaryotic initiation factor 4A-II	ATP binding	Class I
1844	Aged Uncoated Ag	Aged	Eukaryotic initiation factor 4A-II	ATP binding	Class I
1398	Aged Uncoated Ag	Aged	Eukaryotic initiation factor 4A-II	GTP binding	Class V
681	Aged Uncoated Ag	Aged	Eukaryotic initiation factor 4A-II	ATP binding	HH combo
682	Aged Uncoated Ag	Aged	Eukaryotic initiation factor 4A-II	ATP binding	HH combo
1399	Aged Uncoated Ag	Aged	Ferric-chelate reductase	Unreviewed	Class V
1845	Aged Uncoated Ag	Aged	Fructose-bisphosphate aldolase	Fructose-bisphosphate aldolase activity	Class I
1846	Aged Uncoated Ag	Aged	Fructose-bisphosphate aldolase	Fructose-bisphosphate aldolase activity	Class I
1400	Aged Uncoated Ag	Aged	Fructose-bisphosphate aldolase	Unreviewed	Class V
683	Aged Uncoated Ag	Aged	Fructose-bisphosphate aldolase	Fructose-bisphosphate aldolase activity	HH combo
684	Aged Uncoated Ag	Aged	Gdp-l-fucose synthetase protein	Coenzyme binding	HH combo
1401	Aged Uncoated Ag	Aged	Glutamine synthetase	NAD binding	Class V
1402	Aged Uncoated Ag	Aged	Gly d 3	GTP binding	Class V
1847	Aged Uncoated Ag	Aged	Glyceraldehyde-3-phosphate dehydrogenase	NAD binding	Class I
1403	Aged Uncoated Ag	Aged	Glyceraldehyde-3-phosphate dehydrogenase	Unreviewed	Class V
1404	Aged Uncoated Ag	Aged	Glyceraldehyde-3-phosphate dehydrogenase	GTP binding	Class V
685	Aged Uncoated Ag	Aged	Glyceraldehyde-3-phosphate dehydrogenase	Glyceraldehyde-3-phosphate dehydrogenase (NAD+) (phosphorylating) activity	HH combo
686	Aged Uncoated Ag	Aged	Glyceraldehyde-3-phosphate dehydrogenase	NAD binding	HH combo
1848	Aged Uncoated Ag	Aged	GTP-binding nuclear protein	GTP binding	Class I
1405	Aged Uncoated Ag	Aged	GTP-binding nuclear protein	Adenosylhomocysteinase activity	Class V
687	Aged Uncoated Ag	Aged	GTP-binding nuclear protein	GTP binding	HH combo
1849	Aged Uncoated Ag	Aged	GTP-binding protein SAR1a	GTP binding	Class I
688	Aged Uncoated Ag	Aged	GTP-binding protein SAR1a	GTP binding	HH combo
1850	Aged Uncoated Ag	Aged	Guanine nucleotide-binding protein subunit beta-2 1	Unreviewed	Class I
1406	Aged Uncoated Ag	Aged	Guanine nucleotide-binding protein subunit beta-2 1	DNA binding	Class V
1851	Aged Uncoated Ag	Aged	Heat shock 70 kDa protein cognate	ATP binding	Class I
1852	Aged Uncoated Ag	Aged	Heat shock 70 kDa protein cognate	ATP binding	Class I
1853	Aged Uncoated Ag	Aged	Heat shock 70 kDa protein cognate	ATP binding	Class I
1854	Aged Uncoated Ag	Aged	Heat shock 70 kDa protein cognate	ATP binding	Class I
1855	Aged Uncoated Ag	Aged	Heat shock 70 kDa protein cognate	ATP binding	Class I
1407	Aged Uncoated Ag	Aged	Heat shock 70 kDa protein cognate	Unreviewed	Class V
1408	Aged Uncoated Ag	Aged	Heat shock 70 kDa protein cognate	Unreviewed	Class V
689	Aged Uncoated Ag	Aged	Heat shock 70 kDa protein cognate	ATP binding	HH combo
690	Aged Uncoated Ag	Aged	Heat shock 70 kDa protein cognate	ATP binding	HH combo
1856	Aged Uncoated Ag	Aged	Heat shock protein HSP 90-alpha	ATP binding	Class I
1409	Aged Uncoated Ag	Aged	Heat shock protein HSP 90-alpha	Unreviewed	Class V
691	Aged Uncoated Ag	Aged	Heat shock protein HSP 90-alpha	ATP binding	HH combo
1857	Aged Uncoated Ag	Aged	Histone H2A	DNA binding	Class I
1858	Aged Uncoated Ag	Aged	Histone H2A	DNA binding	Class I
692	Aged Uncoated Ag	Aged	Histone H2A	DNA binding	HH combo
1859	Aged Uncoated Ag	Aged	Histone H2B	DNA binding	Class I
1410	Aged Uncoated Ag	Aged	Histone H2B	DNA binding	Class V
693	Aged Uncoated Ag	Aged	Histone H2B	DNA binding	HH combo
1860	Aged Uncoated Ag	Aged	Histone H3.2	DNA binding	Class I
1411	Aged Uncoated Ag	Aged	Histone H3.2	NAD binding	Class V
694	Aged Uncoated Ag	Aged	Histone H3.2	DNA binding	HH combo
1861	Aged Uncoated Ag	Aged	Histone H4	DNA binding	Class I
1412	Aged Uncoated Ag	Aged	Histone H4	GTP binding	Class V
695	Aged Uncoated Ag	Aged	Histone H4	DNA binding	HH combo
696	Aged Uncoated Ag	Aged	Histone-lysine N-methyltransferase	Extracellular ligand-gated ion channel activity	HH combo
1862	Aged Uncoated Ag	Aged	Isocitrate dehydrogenase [NADP]	NAD binding	Class I
1413	Aged Uncoated Ag	Aged	Isocitrate dehydrogenase [NADP]	Structural constituent of cuticle	Class V
697	Aged Uncoated Ag	Aged	Isocitrate dehydrogenase [NADP]	Isocitrate dehydrogenase (NADP+) activity	HH combo
1863	Aged Uncoated Ag	Aged	Isocitrate lyase	Isocitrate lyase activity	Class I
1414	Aged Uncoated Ag	Aged	Lamin-A	Unreviewed	Class V
1864	Aged Uncoated Ag	Aged	Malate dehydrogenase	L-malate dehydrogenase activity	Class I
1415	Aged Uncoated Ag	Aged	Matrix metalloproteinase 1	Unreviewed	Class V
698	Aged Uncoated Ag	Aged	Matrix metalloproteinase 1	Metalloendopeptidase activity	HH combo
1865	Aged Uncoated Ag	Aged	NAD(P) transhydrogenase	NAD(P)+ transhydrogenase activity	Class I
1866	Aged Uncoated Ag	Aged	Nascent polypeptide-associated complex subunit alpha	Unreviewed	Class I
1867	Aged Uncoated Ag	Aged	Nuclear factor interleukin-3-regulated protein	DNA-binding transcription factor activity	Class I
1416	Aged Uncoated Ag	Aged	Phosphate import ATP-binding protein PstB	Isocitrate dehydrogenase (NADP+) activity	Class V
1868	Aged Uncoated Ag	Aged	Polyadenylate-binding protein	RNA binding	Class I
699	Aged Uncoated Ag	Aged	Polyadenylate-binding protein	RNA binding	HH combo
1869	Aged Uncoated Ag	Aged	Polyubiquitin-C	Unreviewed	Class I
1417	Aged Uncoated Ag	Aged	Polyubiquitin-C	GTP binding	Class V
1870	Aged Uncoated Ag	Aged	Pre-mRNA-processing-splicing factor	U5 snRNA binding	Class I
700	Aged Uncoated Ag	Aged	Putative 40S ribosomal protein	Structural constituent of ribosome	HH combo
1871	Aged Uncoated Ag	Aged	Putative 40S ribosomal protein S14	Structural constituent of ribosome	Class I
1872	Aged Uncoated Ag	Aged	Putative 40S ribosomal protein S14	Structural constituent of ribosome	Class I
1418	Aged Uncoated Ag	Aged	Putative Actin, alpha skeletal muscle	Chitin binding	Class V
1419	Aged Uncoated Ag	Aged	Putative Actin, alpha skeletal muscle	ATP binding	Class V
1420	Aged Uncoated Ag	Aged	Putative Actin, alpha skeletal muscle	Fructose-bisphosphate aldolase activity	Class V
1421	Aged Uncoated Ag	Aged	Putative Adenosylhomocysteinase adohcyaseec hydrolase	Unreviewed	Class V
1873	Aged Uncoated Ag	Aged	Putative ATP synthase subunit alpha	ATP binding	Class I
701	Aged Uncoated Ag	Aged	Putative ATP-binding cassette sub-family F member	ATP binding	HH combo
1422	Aged Uncoated Ag	Aged	Putative Ccp84Ae	Structural constituent of cuticle	Class V
1874	Aged Uncoated Ag	Aged	Putative Elongation factor 1-alpha	GTP binding	Class I
1423	Aged Uncoated Ag	Aged	Putative Elongation factor 1-alpha	Heme binding	Class V
1424	Aged Uncoated Ag	Aged	Putative Elongation factor 1-alpha	GTP binding	Class V
702	Aged Uncoated Ag	Aged	Putative Elongation factor 1-alpha	GTP binding	HH combo
1425	Aged Uncoated Ag	Aged	Putative Glutamate synthase	ATP binding	Class V
1875	Aged Uncoated Ag	Aged	Putative Heat shock 70 kDa protein cognate	ATP binding	Class I
1876	Aged Uncoated Ag	Aged	Putative Heat shock 70 kDa protein cognate	ATP binding	Class I
1426	Aged Uncoated Ag	Aged	Putative Pollen-specific leucine-rich repeat extensin protein 1	Structural constituent of cuticle	Class V
1427	Aged Uncoated Ag	Aged	Putative Polyubiquitin-B	Unreviewed	Class V
1428	Aged Uncoated Ag	Aged	Putative Pupal cuticle protein	Chitin binding	Class V
1877	Aged Uncoated Ag	Aged	Ras-related protein Rab-11B	GTP binding	Class I
1429	Aged Uncoated Ag	Aged	Ras-related protein Rab-11B	Structural constituent of cuticle	Class V
703	Aged Uncoated Ag	Aged	Ras-related protein Rab-11B	GTP binding	HH combo
1878	Aged Uncoated Ag	Aged	Ras-related protein Rab-26	GTP binding	Class I
1879	Aged Uncoated Ag	Aged	Ras-related protein Rab-7a	GTP binding	Class I
1430	Aged Uncoated Ag	Aged	Ras-related protein Rab-8B	ATP binding	Class V
1880	Aged Uncoated Ag	Aged	Ribosomal protein L15	Structural constituent of ribosome	Class I
704	Aged Uncoated Ag	Aged	Ribosomal protein L15	Structural constituent of ribosome	HH combo
1431	Aged Uncoated Ag	Aged	Ribosome-releasing factor 2	GTP binding	Class V
1881	Aged Uncoated Ag	Aged	S-adenosylmethionine synthase	ATP binding	Class I
1432	Aged Uncoated Ag	Aged	S-adenosylmethionine synthase	GTP binding	Class V
705	Aged Uncoated Ag	Aged	S-adenosylmethionine synthase	ATP binding	HH combo
706	Aged Uncoated Ag	Aged	Small nuclear ribonucleoprotein-associated protein B	Unreviewed	HH combo
1882	Aged Uncoated Ag	Aged	Succinate dehydrogenase [ubiquinone] flavoprotein subunit	Unreviewed	Class I
1883	Aged Uncoated Ag	Aged	Succinate dehydrogenase [ubiquinone] flavoprotein subunit	Unreviewed	Class I
1884	Aged Uncoated Ag	Aged	Succinyl-CoA ligase [ADP/GDP-forming] subunit alpha	Cofactor binding	Class I
707	Aged Uncoated Ag	Aged	Trypsin serine protease-like protein	Serine-type endopeptidase activity	HH combo
1885	Aged Uncoated Ag	Aged	Tubulin alpha chain	GTP binding	Class I
1886	Aged Uncoated Ag	Aged	Tubulin alpha chain	GTP binding	Class I
1887	Aged Uncoated Ag	Aged	Tubulin alpha chain	GTP binding	Class I
1888	Aged Uncoated Ag	Aged	Tubulin alpha chain	GTP binding	Class I
1889	Aged Uncoated Ag	Aged	Tubulin alpha chain	GTP binding	Class I
1433	Aged Uncoated Ag	Aged	Tubulin alpha chain	ATP binding	Class V
1434	Aged Uncoated Ag	Aged	Tubulin alpha chain	Structural constituent of cuticle	Class V
708	Aged Uncoated Ag	Aged	Tubulin alpha chain	GTP binding	HH combo
1890	Aged Uncoated Ag	Aged	Tubulin beta chain	GTP binding	Class I
1891	Aged Uncoated Ag	Aged	Tubulin beta chain	GTP binding	Class I
1892	Aged Uncoated Ag	Aged	Tubulin beta chain	GTP binding	Class I
1435	Aged Uncoated Ag	Aged	Tubulin beta chain	Unreviewed	Class V
1436	Aged Uncoated Ag	Aged	Tubulin beta chain	Structural constituent of cuticle	Class V
1437	Aged Uncoated Ag	Aged	Tubulin beta chain	ATP binding	Class V
709	Aged Uncoated Ag	Aged	Tubulin beta chain	GTP binding	HH combo
710	Aged Uncoated Ag	Aged	Tubulin beta chain	GTP binding	HH combo
1438	Aged Uncoated Ag	Aged	Tubulin beta-4B chain-like protein	Unreviewed	Class V
711	Aged Uncoated Ag	Aged	Tubulin beta-4B chain-like protein	GTP binding	HH combo
1893	Aged Uncoated Ag	Aged	Uncharacterized protein	Protein-chromophore linkage	Class I
1894	Aged Uncoated Ag	Aged	Uncharacterized protein	U5 snRNA binding	Class I
1895	Aged Uncoated Ag	Aged	Uncharacterized protein	Structural constituent of cuticle	Class I
1896	Aged Uncoated Ag	Aged	Uncharacterized protein	Structural constituent of cuticle	Class I
1897	Aged Uncoated Ag	Aged	Uncharacterized protein	Unreviewed	Class I
1898	Aged Uncoated Ag	Aged	Uncharacterized protein	Unreviewed	Class I
1439	Aged Uncoated Ag	Aged	Uncharacterized protein	ATP binding	Class V
1440	Aged Uncoated Ag	Aged	Uncharacterized protein	ATP binding	Class V
1441	Aged Uncoated Ag	Aged	Uncharacterized protein	Serine-type endopeptidase activity	Class V
1442	Aged Uncoated Ag	Aged	Uncharacterized protein	Unreviewed	Class V
1443	Aged Uncoated Ag	Aged	Uncharacterized protein	DNA binding	Class V
1444	Aged Uncoated Ag	Aged	Uncharacterized protein	ATP binding	Class V
1445	Aged Uncoated Ag	Aged	Uncharacterized protein	Unreviewed	Class V
1446	Aged Uncoated Ag	Aged	Uncharacterized protein	GTP binding	Class V
1447	Aged Uncoated Ag	Aged	Uncharacterized protein	ATP binding	Class V
1448	Aged Uncoated Ag	Aged	Uncharacterized protein	Structural constituent of ribosome	Class V
1449	Aged Uncoated Ag	Aged	Uncharacterized protein	ATP binding	Class V
1450	Aged Uncoated Ag	Aged	Uncharacterized protein	ATP binding	Class V
1451	Aged Uncoated Ag	Aged	Uncharacterized protein	GTP binding	Class V
1452	Aged Uncoated Ag	Aged	Uncharacterized protein	ATP binding	Class V
1453	Aged Uncoated Ag	Aged	Uncharacterized protein	ATP binding	Class V
1454	Aged Uncoated Ag	Aged	Uncharacterized protein	ATP binding	Class V
1455	Aged Uncoated Ag	Aged	Uncharacterized protein	Unreviewed	Class V
1456	Aged Uncoated Ag	Aged	Uncharacterized protein	Lipid transporter activity	Class V
1457	Aged Uncoated Ag	Aged	Uncharacterized protein	DNA binding	Class V
1458	Aged Uncoated Ag	Aged	Uncharacterized protein	Glutamate-ammonia ligase activity	Class V
1459	Aged Uncoated Ag	Aged	Uncharacterized protein	Unreviewed	Class V
1460	Aged Uncoated Ag	Aged	Uncharacterized protein	ATP binding	Class V
1461	Aged Uncoated Ag	Aged	Uncharacterized protein	DNA binding	Class V
1462	Aged Uncoated Ag	Aged	Uncharacterized protein	DNA binding	Class V
1463	Aged Uncoated Ag	Aged	Uncharacterized protein	Metalloendopeptidase activity	Class V
1464	Aged Uncoated Ag	Aged	Uncharacterized protein	GTP binding	Class V
1465	Aged Uncoated Ag	Aged	Uncharacterized protein	Glutamate synthase activity	Class V
1466	Aged Uncoated Ag	Aged	Uncharacterized protein	ATP binding	Class V
1467	Aged Uncoated Ag	Aged	Uncharacterized protein	Structural constituent of cuticle	Class V
1468	Aged Uncoated Ag	Aged	Uncharacterized protein	Structural constituent of cuticle	Class V
712	Aged Uncoated Ag	Aged	Uncharacterized protein	Protein-chromophore linkage	HH combo
713	Aged Uncoated Ag	Aged	Uncharacterized protein	Unreviewed	HH combo
714	Aged Uncoated Ag	Aged	Uncharacterized protein	Unreviewed	HH combo
715	Aged Uncoated Ag	Aged	Uncharacterized protein	Hydrolase activity	HH combo
716	Aged Uncoated Ag	Aged	Uncharacterized protein	Unreviewed	HH combo
717	Aged Uncoated Ag	Aged	Uncharacterized protein	Unreviewed	HH combo
1899	Aged Uncoated Ag	Aged	V-type proton ATPase catalytic subunit A	ATP binding	Class I
1990	Control	Control	ATP synthase subunit beta	ATP binding	Class I
2001	Control	Control	ATP synthase subunit beta	ATP binding	Class V
1979	Control	Control	ATP synthase subunit beta	ATP binding	HH combo
1991	Control	Control	Chorion peroxidase	Heme binding	Class I
2002	Control	Control	Chorion peroxidase	Heme binding	Class V
1980	Control	Control	Chorion peroxidase	Heme binding	HH combo
1992	Control	Control	Chromodomain-helicase-DNA-binding 7 protein	ATP binding	Class I
2003	Control	Control	Chromodomain-helicase-DNA-binding 7 protein	ATP binding	Class V
1981	Control	Control	Chromodomain-helicase-DNA-binding 7 protein	ATP binding	HH combo
1993	Control	Control	Gly d 3	Serine-type endopeptidase activity	Class I
2004	Control	Control	Gly d 3	Serine-type endopeptidase activity	Class V
1982	Control	Control	Gly d 3	Serine-type endopeptidase activity	HH combo
1994	Control	Control	Inositol 1,4,5-trisphosphate receptor type	Inositol 1,4,5-trisphosphate-sensitive calcium-release channel activity	Class I
2005	Control	Control	Inositol 1,4,5-trisphosphate receptor type	Inositol 1,4,5-trisphosphate-sensitive calcium-release channel activity	Class V
1983	Control	Control	Inositol 1,4,5-trisphosphate receptor type	Inositol 1,4,5-trisphosphate-sensitive calcium-release channel activity	HH combo
1995	Control	Control	Matrix metalloproteinase 1	Metalloendopeptidase activity	Class I
2006	Control	Control	Matrix metalloproteinase 1	Metalloendopeptidase activity	Class V
1984	Control	Control	Matrix metalloproteinase 1	Metalloendopeptidase activity	HH combo
1996	Control	Control	Uncharacterized protein	Integral component of membrane	Class I
1997	Control	Control	Uncharacterized protein	Unreviewed	Class I
1998	Control	Control	Uncharacterized protein	ATP binding	Class I
1999	Control	Control	Uncharacterized protein	Integral component of membrane	Class I
2000	Control	Control	Uncharacterized protein	Structural constituent of cuticle	Class I
2007	Control	Control	Uncharacterized protein	Integral component of membrane	Class V
2008	Control	Control	Uncharacterized protein	Unreviewed	Class V
2009	Control	Control	Uncharacterized protein	ATP binding	Class V
2010	Control	Control	Uncharacterized protein	Integral component of membrane	Class V
2011	Control	Control	Uncharacterized protein	Structural constituent of cuticle	Class V
1985	Control	Control	Uncharacterized protein	Integral component of membrane	HH combo
1986	Control	Control	Uncharacterized protein	Unreviewed	HH combo
1987	Control	Control	Uncharacterized protein	ATP binding	HH combo
1988	Control	Control	Uncharacterized protein	Integral component of membrane	HH combo
1989	Control	Control	Uncharacterized protein	Structural constituent of cuticle	HH combo
57	Pristine Ag2S	Pristine	40S ribosomal protein	RNA binding	HH combo
73	Pristine Ag2S	Pristine	40S ribosomal protein	Structural constituent of ribosome	HH combo
1025	Pristine Ag2S	Pristine	60 kDa heat shock protein	ATP binding	Class V
58	Pristine Ag2S	Pristine	60S ribosomal protein	RNA binding	HH combo
1026	Pristine Ag2S	Pristine	Actin, alpha skeletal muscle	ATP binding	Class V
1027	Pristine Ag2S	Pristine	Actin, alpha skeletal muscle	ATP binding	Class V
1028	Pristine Ag2S	Pristine	Actin, alpha skeletal muscle	ATP binding	Class V
78	Pristine Ag2S	Pristine	Actin, alpha skeletal muscle	Unreviewed	HH combo
44	Pristine Ag2S	Pristine	ADP-ribosylation factor	GTP binding	HH combo
1029	Pristine Ag2S	Pristine	ATP synthase subunit alpha	ATP binding	Class V
1030	Pristine Ag2S	Pristine	ATP synthase subunit alpha	ATP binding	Class V
28	Pristine Ag2S	Pristine	ATP synthase subunit alpha	ATP binding	HH combo
29	Pristine Ag2S	Pristine	ATP synthase subunit alpha	ATP binding	HH combo
1031	Pristine Ag2S	Pristine	ATP synthase subunit beta	ATP binding	Class V
1032	Pristine Ag2S	Pristine	ATP synthase subunit beta	ATP binding	Class V
30	Pristine Ag2S	Pristine	ATP synthase subunit beta	ATP binding	HH combo
31	Pristine Ag2S	Pristine	ATP synthase subunit beta	ATP binding	HH combo
32	Pristine Ag2S	Pristine	ATP-dependent zinc metalloprotease FtsH	ATP binding	HH combo
33	Pristine Ag2S	Pristine	Carbamoyl-phosphate synthase large chain	ATP binding	HH combo
1033	Pristine Ag2S	Pristine	Cathepsin-l cysteine peptidase	Cysteine-type peptidase activity	Class V
1034	Pristine Ag2S	Pristine	Chemosensory protein 13	Unreviewed	Class V
51	Pristine Ag2S	Pristine	Chorion peroxidase	Heme binding	HH combo
59	Pristine Ag2S	Pristine	Chymotrypsin elastase family member	Serine-type endopeptidase activity	HH combo
40	Pristine Ag2S	Pristine	Collagen alpha-5(VI) chain	Collagen trimer	HH combo
75	Pristine Ag2S	Pristine	Collagen alpha-5(VI) chain/sw-like protein	Unreviewed	HH combo
38	Pristine Ag2S	Pristine	Cuticular protein analogous to peritrophins	Chitin metabolic process	HH combo
39	Pristine Ag2S	Pristine	Cuticular protein analogous to peritrophins	Chitin metabolic process	HH combo
1035	Pristine Ag2S	Pristine	Cuticular protein analogous to peritrophins 3-D1	Chitin binding	Class V
1036	Pristine Ag2S	Pristine	DNA-directed RNA polymerase subunit beta	DNA binding	Class V
1037	Pristine Ag2S	Pristine	Double oxidase: two peroxidase domains	Heme binding	Class V
1038	Pristine Ag2S	Pristine	Double oxidase: two peroxidase domains	Heme binding	Class V
1039	Pristine Ag2S	Pristine	Elongation factor 1-alpha	GTP binding	Class V
45	Pristine Ag2S	Pristine	Elongation factor Tu	GTP binding	HH combo
1040	Pristine Ag2S	Pristine	Endocuticle structural glycoprotein SgAbd-2	Structural constituent of cuticle	Class V
43	Pristine Ag2S	Pristine	Fructose-bisphosphate aldolase	Fructose-bisphosphate aldolase activity	HH combo
1041	Pristine Ag2S	Pristine	Glutamine synthetase	Glutamate-ammonia ligase activity	Class V
53	Pristine Ag2S	Pristine	Glutamine synthetase	Nitrogen compound metabolic process	HH combo
1042	Pristine Ag2S	Pristine	Gly d 3	Serine-type endopeptidase activity	Class V
60	Pristine Ag2S	Pristine	Gly d 3	Serine-type endopeptidase activity	HH combo
46	Pristine Ag2S	Pristine	GTP-binding nuclear protein	GTP binding	HH combo
34	Pristine Ag2S	Pristine	Heat shock 70 kDa protein cognate	ATP binding	HH combo
35	Pristine Ag2S	Pristine	Heat shock 70 kDa protein cognate	ATP binding	HH combo
36	Pristine Ag2S	Pristine	Heat shock protein HSP 90-alpha	ATP binding	HH combo
41	Pristine Ag2S	Pristine	Histone H2A	DNA binding	HH combo
1043	Pristine Ag2S	Pristine	Histone H4	DNA binding	Class V
42	Pristine Ag2S	Pristine	Histone H4	DNA binding	HH combo
1044	Pristine Ag2S	Pristine	Isocitrate dehydrogenase [NADP]	Isocitrate dehydrogenase (NADP+) activity	Class V
52	Pristine Ag2S	Pristine	Isocitrate dehydrogenase [NADP]	Socitrate metabolic process	HH combo
1045	Pristine Ag2S	Pristine	Polyubiquitin-C	Unreviewed	Class V
76	Pristine Ag2S	Pristine	Polyubiquitin-C	Unreviewed	HH combo
77	Pristine Ag2S	Pristine	Polyubiquitin-C	Unreviewed	HH combo
74	Pristine Ag2S	Pristine	Putative 40S ribosomal protein	Translation	HH combo
37	Pristine Ag2S	Pristine	Putative ATP-binding cassette sub-family F member	ATP binding	HH combo
61	Pristine Ag2S	Pristine	Putative Ccp84Ae	Structural constituent of cuticle	HH combo
47	Pristine Ag2S	Pristine	Putative Elongation factor 1-alpha	GTP binding	HH combo
1046	Pristine Ag2S	Pristine	Putative Isocitrate dehydrogenase [NADP]	Isocitrate dehydrogenase (NADP+) activity	Class V
55	Pristine Ag2S	Pristine	Putative Serine protease inhibitor	Peptidase activity	HH combo
1047	Pristine Ag2S	Pristine	Putative UPF0392 protein F13G3.3	Unreviewed	Class V
48	Pristine Ag2S	Pristine	Ras-related protein Rab-11B	GTP binding	HH combo
1048	Pristine Ag2S	Pristine	Ribosome-releasing factor 2, mitochondrial-like protein	GTP binding	Class V
1049	Pristine Ag2S	Pristine	Tubulin beta chain	GTP binding	Class V
1050	Pristine Ag2S	Pristine	Tubulin beta chain	GTP binding	Class V
49	Pristine Ag2S	Pristine	Tubulin beta chain	GTP binding	HH combo
50	Pristine Ag2S	Pristine	Tubulin beta chain	GTP binding	HH combo
1051	Pristine Ag2S	Pristine	Uncharacterized protein	Structural constituent of cuticle	Class V
1052	Pristine Ag2S	Pristine	Uncharacterized protein	Unreviewed	Class V
1053	Pristine Ag2S	Pristine	Uncharacterized protein	Unreviewed	Class V
1054	Pristine Ag2S	Pristine	Uncharacterized protein	Structural constituent of cuticle	Class V
1055	Pristine Ag2S	Pristine	Uncharacterized protein	Structural constituent of cuticle	Class V
1056	Pristine Ag2S	Pristine	Uncharacterized protein	Unreviewed	Class V
54	Pristine Ag2S	Pristine	Uncharacterized protein	Nucleic acid binding	HH combo
56	Pristine Ag2S	Pristine	Uncharacterized protein	Protein-chromophore linkage	HH combo
62	Pristine Ag2S	Pristine	Uncharacterized protein	Structural constituent of cuticle	HH combo
63	Pristine Ag2S	Pristine	Uncharacterized protein	Structural constituent of cuticle	HH combo
64	Pristine Ag2S	Pristine	Uncharacterized protein	Structural constituent of cuticle	HH combo
65	Pristine Ag2S	Pristine	Uncharacterized protein	Structural constituent of cuticle	HH combo
66	Pristine Ag2S	Pristine	Uncharacterized protein	Structural constituent of cuticle	HH combo
67	Pristine Ag2S	Pristine	Uncharacterized protein	Structural constituent of cuticle	HH combo
68	Pristine Ag2S	Pristine	Uncharacterized protein	Structural constituent of cuticle	HH combo
69	Pristine Ag2S	Pristine	Uncharacterized protein	Structural constituent of cuticle	HH combo
70	Pristine Ag2S	Pristine	Uncharacterized protein	Structural constituent of cuticle	HH combo
71	Pristine Ag2S	Pristine	Uncharacterized protein	Structural constituent of cuticle	HH combo
72	Pristine Ag2S	Pristine	Uncharacterized protein	Structural constituent of cuticle	HH combo
79	Pristine Ag2S	Pristine	Uncharacterized protein	Unreviewed	HH combo
80	Pristine Ag2S	Pristine	Uncharacterized protein	Unreviewed	HH combo
81	Pristine Ag2S	Pristine	Uncharacterized protein	Unreviewed	HH combo
82	Pristine Ag2S	Pristine	Uncharacterized protein	Unreviewed	HH combo
83	Pristine Ag2S	Pristine	Uncharacterized protein	Unreviewed	HH combo
84	Pristine Ag2S	Pristine	Uncharacterized protein	Unreviewed	HH combo
85	Pristine Ag2S	Pristine	Uncharacterized protein	Unreviewed	HH combo
1057	Pristine bulk Ag	Pristine	14-3-3 protein zeta/delta	Protein domain specific binding	Class V
1058	Pristine bulk Ag	Pristine	30S ribosomal protein S3	Protein domain specific binding	Class V
21	Pristine bulk Ag	Pristine	40S ribosomal protein	RNA binding	HH combo
22	Pristine bulk Ag	Pristine	40S ribosomal protein	RNA binding	HH combo
1059	Pristine bulk Ag	Pristine	60 kDa heat shock protein	ATP binding	Class V
26	Pristine bulk Ag	Pristine	60S ribosomal protein	Structural constituent of ribosome	HH combo
1060	Pristine bulk Ag	Pristine	Actin, alpha skeletal muscle	ATP binding	Class V
14	Pristine bulk Ag	Pristine	ADP-ribosylation factor	GTP binding	HH combo
1061	Pristine bulk Ag	Pristine	Alpha-enolase	Magnesium ion binding	Class V
1062	Pristine bulk Ag	Pristine	Apolipophorins	Lipid transporter activity	Class V
1063	Pristine bulk Ag	Pristine	Apolipophorins	Lipid transporter activity	Class V
1064	Pristine bulk Ag	Pristine	ATP synthase subunit alpha	ATP binding	Class V
1	Pristine bulk Ag	Pristine	ATP synthase subunit alpha	ATP binding	HH combo
2	Pristine bulk Ag	Pristine	ATP synthase subunit alpha	ATP binding	HH combo
1065	Pristine bulk Ag	Pristine	ATP synthase subunit beta	ATP binding	Class V
1066	Pristine bulk Ag	Pristine	ATP synthase subunit beta	ATP binding	Class V
1067	Pristine bulk Ag	Pristine	ATP synthase subunit beta	ATP binding	Class V
3	Pristine bulk Ag	Pristine	ATP synthase subunit beta	ATP binding	HH combo
4	Pristine bulk Ag	Pristine	ATP synthase subunit beta	ATP binding	HH combo
5	Pristine bulk Ag	Pristine	Carbamoyl-phosphate synthase large chain	ATP binding	HH combo
1068	Pristine bulk Ag	Pristine	Cathepsin L	Cysteine-type peptidase activity	Class V
1069	Pristine bulk Ag	Pristine	Chemosensory protein 13	Unreviewed	Class V
23	Pristine bulk Ag	Pristine	Chymotrypsin BI	Serine-type endopeptidase activity	HH combo
1070	Pristine bulk Ag	Pristine	Chymotrypsin elastase family member 2A	Serine-type endopeptidase activity	Class V
24	Pristine bulk Ag	Pristine	Chymotrypsin elastase family member 2A	Serine-type endopeptidase activity	HH combo
1071	Pristine bulk Ag	Pristine	Cleavage stimulation factor 64 kDa subunit	RNA binding	Class V
1072	Pristine bulk Ag	Pristine	Clip-domain serine protease	Serine-type endopeptidase activity	Class V
1073	Pristine bulk Ag	Pristine	Copper-zinc cu-zn superoxide dismutase	Serine-type endopeptidase activity	Class V
1074	Pristine bulk Ag	Pristine	Copper-zinc cu-zn superoxide dismutase	Serine-type endopeptidase activity	Class V
1075	Pristine bulk Ag	Pristine	Copper-zinc cu-zn superoxide dismutase	Serine-type endopeptidase activity	Class V
1076	Pristine bulk Ag	Pristine	Copper-zinc cu-zn superoxide dismutase	Serine-type endopeptidase activity	Class V
1077	Pristine bulk Ag	Pristine	Copper-zinc cu-zn superoxide dismutase	Serine-type endopeptidase activity	Class V
1078	Pristine bulk Ag	Pristine	Copper-zinc cu-zn superoxide dismutase	Serine-type endopeptidase activity	Class V
1079	Pristine bulk Ag	Pristine	Copper-zinc cu-zn superoxide dismutase	Serine-type endopeptidase activity	Class V
1080	Pristine bulk Ag	Pristine	Copper-zinc cu-zn superoxide dismutase	Serine-type endopeptidase activity	Class V
1081	Pristine bulk Ag	Pristine	Copper-zinc cu-zn superoxide dismutase	Lipid transporter activity	Class V
1082	Pristine bulk Ag	Pristine	Copper-zinc cu-zn superoxide dismutase	Lipid transporter activity	Class V
1083	Pristine bulk Ag	Pristine	Copper-zinc cu-zn superoxide dismutase	Lipid transporter activity	Class V
1084	Pristine bulk Ag	Pristine	Copper-zinc cu-zn superoxide dismutase	Lipid transporter activity	Class V
1085	Pristine bulk Ag	Pristine	Copper-zinc cu-zn superoxide dismutase	Lipid transporter activity	Class V
1086	Pristine bulk Ag	Pristine	Copper-zinc cu-zn superoxide dismutase	Lipid transporter activity	Class V
1087	Pristine bulk Ag	Pristine	Copper-zinc cu-zn superoxide dismutase	Lipid transporter activity	Class V
1088	Pristine bulk Ag	Pristine	Copper-zinc cu-zn superoxide dismutase	Lipid transporter activity	Class V
1089	Pristine bulk Ag	Pristine	Copper-zinc cu-zn superoxide dismutase	Lipid transporter activity	Class V
1090	Pristine bulk Ag	Pristine	Copper-zinc cu-zn superoxide dismutase	Lipid transporter activity	Class V
17	Pristine bulk Ag	Pristine	Copper-zinc cu-zn superoxide dismutase	Lipid transporter activity	HH combo
1091	Pristine bulk Ag	Pristine	Di-domain hemoglobin	Heme binding	Class V
1092	Pristine bulk Ag	Pristine	Di-domain hemoglobin	Heme binding	Class V
1093	Pristine bulk Ag	Pristine	Di-domain hemoglobin	Heme binding	Class V
1094	Pristine bulk Ag	Pristine	Di-domain hemoglobin	Heme binding	Class V
1095	Pristine bulk Ag	Pristine	Di-domain hemoglobin	Heme binding	Class V
1096	Pristine bulk Ag	Pristine	DNA-directed RNA polymerase subunit beta	DNA binding	Class V
1097	Pristine bulk Ag	Pristine	Double oxidase: two peroxidase domains	Heme binding	Class V
1098	Pristine bulk Ag	Pristine	Elongation factor G	GTP binding	Class V
1099	Pristine bulk Ag	Pristine	Elongation factor Tu	GTP binding	Class V
15	Pristine bulk Ag	Pristine	Elongation factor Tu	GTP binding	HH combo
6	Pristine bulk Ag	Pristine	Eukaryotic initiation factor 4A-II	ATP binding	HH combo
1100	Pristine bulk Ag	Pristine	Filamentous hemagglutinin	Unreviewed	Class V
1101	Pristine bulk Ag	Pristine	Glutamine synthetase	Glutamate-ammonia ligase activity	Class V
1102	Pristine bulk Ag	Pristine	Gly d 3	Serine-type endopeptidase activity	Class V
19	Pristine bulk Ag	Pristine	Glyceraldehyde-3-phosphate dehydrogenase	NAD binding	HH combo
7	Pristine bulk Ag	Pristine	Heat shock 70 kDa protein cognate	ATP binding	HH combo
8	Pristine bulk Ag	Pristine	Heat shock 70 kDa protein cognate	ATP binding	HH combo
1103	Pristine bulk Ag	Pristine	Hemoglobin	Heme binding	Class V
1104	Pristine bulk Ag	Pristine	Hemoglobin	Heme binding	Class V
1105	Pristine bulk Ag	Pristine	Histone H4	DNA binding	Class V
13	Pristine bulk Ag	Pristine	Histone H4	DNA binding	HH combo
1106	Pristine bulk Ag	Pristine	Isocitrate dehydrogenase [NADP]	Isocitrate dehydrogenase (NADP+) activity	Class V
1107	Pristine bulk Ag	Pristine	Isocitrate dehydrogenase [NADP]	Isocitrate dehydrogenase (NADP+) activity	Class V
16	Pristine bulk Ag	Pristine	Isocitrate dehydrogenase [NADP]	Isocitrate dehydrogenase (NADP+) activity	HH combo
1108	Pristine bulk Ag	Pristine	Malate dehydrogenase	L-malate dehydrogenase activity	Class V
1109	Pristine bulk Ag	Pristine	Matrix metalloproteinase 1	Metalloendopeptidase activity	Class V
12	Pristine bulk Ag	Pristine	Niemann-Pick type C-2d	Cellular component	HH combo
27	Pristine bulk Ag	Pristine	Putative 40S ribosomal protein	Structural constituent of ribosome	HH combo
1110	Pristine bulk Ag	Pristine	Putative Acetyl-Coenzyme A synthetase	Catalytic activity	Class V
1111	Pristine bulk Ag	Pristine	Putative Adenosylhomocysteinase adohcyaseec hydrolase	Adenosylhomocysteinase activity	Class V
9	Pristine bulk Ag	Pristine	Putative ATP-binding cassette sub-family F member	ATP binding	HH combo
1112	Pristine bulk Ag	Pristine	Putative Copper-zinc cu-zn superoxide dismutase	Lipid transporter activity	Class V
1113	Pristine bulk Ag	Pristine	Putative Copper-zinc cu-zn superoxide dismutase	Lipid transporter activity	Class V
1114	Pristine bulk Ag	Pristine	Putative Copper-zinc cu-zn superoxide dismutase	Lipid transporter activity	Class V
1115	Pristine bulk Ag	Pristine	Putative Copper-zinc cu-zn superoxide dismutase	Lipid transporter activity	Class V
1116	Pristine bulk Ag	Pristine	Putative Copper-zinc cu-zn superoxide dismutase	Lipid transporter activity	Class V
1117	Pristine bulk Ag	Pristine	Putative Copper-zinc cu-zn superoxide dismutase	Lipid transporter activity	Class V
1118	Pristine bulk Ag	Pristine	Putative Copper-zinc cu-zn superoxide dismutase	Lipid transporter activity	Class V
1119	Pristine bulk Ag	Pristine	Putative di-domain hemoglobin	Heme binding	Class V
1120	Pristine bulk Ag	Pristine	Putative di-domain hemoglobin	Heme binding	Class V
10	Pristine bulk Ag	Pristine	Putative Elongation factor 1-alpha	ATP binding	HH combo
11	Pristine bulk Ag	Pristine	Putative Heat shock protein HSP 90-alpha	ATP binding	HH combo
1121	Pristine bulk Ag	Pristine	Putative Isocitrate dehydrogenase [NADP]	Isocitrate dehydrogenase (NADP+) activity	Class V
1122	Pristine bulk Ag	Pristine	Putative Translational activator GCN1	Unreviewed	Class V
1123	Pristine bulk Ag	Pristine	Putative Vitellogenin-1	Unreviewed	Class V
1124	Pristine bulk Ag	Pristine	Putative Vitellogenin-1	Unreviewed	Class V
1125	Pristine bulk Ag	Pristine	Putative Vitellogenin-1	Unreviewed	Class V
1126	Pristine bulk Ag	Pristine	Putative Vitellogenin-1	Unreviewed	Class V
1127	Pristine bulk Ag	Pristine	Putative Vitellogenin-1	Unreviewed	Class V
1128	Pristine bulk Ag	Pristine	Ribosome-releasing factor 2, mitochondrial-like protein	GTP binding	Class V
1129	Pristine bulk Ag	Pristine	RNA polymerase sigma factor RpoD	DNA binding	Class V
1130	Pristine bulk Ag	Pristine	Spz1	Unreviewed	Class V
1131	Pristine bulk Ag	Pristine	T-complex protein 1 subunit delta	ATP binding	Class V
1132	Pristine bulk Ag	Pristine	Transketolase	Catalytic activity	Class V
1133	Pristine bulk Ag	Pristine	Tubulin alpha chain	GTP binding	Class V
1134	Pristine bulk Ag	Pristine	Tubulin beta chain	GTP binding	Class V
1135	Pristine bulk Ag	Pristine	Tubulin beta chain	GTP binding	Class V
1136	Pristine bulk Ag	Pristine	Tubulin beta chain	GTP binding	Class V
1137	Pristine bulk Ag	Pristine	Uncharacterized protein	Unreviewed	Class V
1138	Pristine bulk Ag	Pristine	Uncharacterized protein	Unreviewed	Class V
1139	Pristine bulk Ag	Pristine	Uncharacterized protein	Serine-type endopeptidase activity	Class V
1140	Pristine bulk Ag	Pristine	Uncharacterized protein	Unreviewed	Class V
1141	Pristine bulk Ag	Pristine	Uncharacterized protein	Unreviewed	Class V
1142	Pristine bulk Ag	Pristine	Uncharacterized protein	Lipid transporter activity	Class V
1143	Pristine bulk Ag	Pristine	Uncharacterized protein	Unreviewed	Class V
1144	Pristine bulk Ag	Pristine	Uncharacterized protein	Unreviewed	Class V
1145	Pristine bulk Ag	Pristine	Uncharacterized protein	Unreviewed	Class V
1146	Pristine bulk Ag	Pristine	Uncharacterized protein	Metal ion binding	Class V
1147	Pristine bulk Ag	Pristine	Uncharacterized protein	Unreviewed	Class V
1148	Pristine bulk Ag	Pristine	Uncharacterized protein	Lipid transporter activity	Class V
1149	Pristine bulk Ag	Pristine	Uncharacterized protein	Lipid transporter activity	Class V
1150	Pristine bulk Ag	Pristine	Uncharacterized protein	Lipid transporter activity	Class V
1151	Pristine bulk Ag	Pristine	Uncharacterized protein	Unreviewed	Class V
1152	Pristine bulk Ag	Pristine	Uncharacterized protein	Lipid transporter activity	Class V
1153	Pristine bulk Ag	Pristine	Uncharacterized protein	Unreviewed	Class V
1154	Pristine bulk Ag	Pristine	Uncharacterized protein	Unreviewed	Class V
1155	Pristine bulk Ag	Pristine	Uncharacterized protein	Structural constituent of cuticle	Class V
1156	Pristine bulk Ag	Pristine	Uncharacterized protein	Unreviewed	Class V
1157	Pristine bulk Ag	Pristine	Uncharacterized protein	Unreviewed	Class V
1158	Pristine bulk Ag	Pristine	Uncharacterized protein	Unreviewed	Class V
1159	Pristine bulk Ag	Pristine	Uncharacterized protein	Lipid transporter activity	Class V
1160	Pristine bulk Ag	Pristine	Uncharacterized protein	Lipid transporter activity	Class V
1161	Pristine bulk Ag	Pristine	Uncharacterized protein	Lipid transporter activity	Class V
1162	Pristine bulk Ag	Pristine	Uncharacterized protein	Lipid transporter activity	Class V
20	Pristine bulk Ag	Pristine	Uncharacterized protein	Protein-chromophore linkage	HH combo
25	Pristine bulk Ag	Pristine	Uncharacterized protein	Structural constituent of cuticle	HH combo
1163	Pristine bulk Ag	Pristine	Vitellogenin fused with superoxide dismutase	Lipid transporter activity	Class V
1164	Pristine bulk Ag	Pristine	Vitellogenin-1	Lipid transporter activity	Class V
1165	Pristine bulk Ag	Pristine	Vitellogenin-1	Lipid transporter activity	Class V
1166	Pristine bulk Ag	Pristine	Vitellogenin-1	Lipid transporter activity	Class V
1167	Pristine bulk Ag	Pristine	Vitellogenin-1	Lipid transporter activity	Class V
1168	Pristine bulk Ag	Pristine	Vitellogenin-1	Lipid transporter activity	Class V
1169	Pristine bulk Ag	Pristine	Vitellogenin-1	Lipid transporter activity	Class V
1170	Pristine bulk Ag	Pristine	Vitellogenin-1	Lipid transporter activity	Class V
1171	Pristine bulk Ag	Pristine	Vitellogenin-1	Lipid transporter activity	Class V
1172	Pristine bulk Ag	Pristine	Vitellogenin-1	Lipid transporter activity	Class V
1173	Pristine bulk Ag	Pristine	Vitellogenin-1	Lipid transporter activity	Class V
18	Pristine bulk Ag	Pristine	Vitellogenin-1	Lipid transporter activity	HH combo
765	Pristine PVP Ag	Pristine	116 kDa U5 small nuclear ribonucleoprotein component protein	GTP binding	Class V
165	Pristine PVP Ag	Pristine	116 kDa U5 small nuclear ribonucleoprotein component protein	GTP binding	HH combo
766	Pristine PVP Ag	Pristine	14-3-3 protein zeta/delta	Protein domain specific binding	Class V
166	Pristine PVP Ag	Pristine	14-3-3 protein zeta/delta	Protein domain specific binding	HH combo
767	Pristine PVP Ag	Pristine	26S protease regulatory subunit 10B	ATP binding	Class V
768	Pristine PVP Ag	Pristine	26S proteasome non-ATPase regulatory subunit	ATP binding	Class V
769	Pristine PVP Ag	Pristine	2-domain hemoglobin	Heme binding	Class V
167	Pristine PVP Ag	Pristine	2-domain hemoglobin	Heme binding	HH combo
770	Pristine PVP Ag	Pristine	40S ribosomal protein	Structural constituent of ribosome	Class V
771	Pristine PVP Ag	Pristine	40S ribosomal protein	Structural constituent of ribosome	Class V
772	Pristine PVP Ag	Pristine	40S ribosomal protein	Structural constituent of ribosome	Class V
773	Pristine PVP Ag	Pristine	40S ribosomal protein	Structural constituent of ribosome	Class V
774	Pristine PVP Ag	Pristine	40S ribosomal protein	Structural constituent of ribosome	Class V
775	Pristine PVP Ag	Pristine	40S ribosomal protein	Structural constituent of ribosome	Class V
776	Pristine PVP Ag	Pristine	40S ribosomal protein	RNA binding	Class V
777	Pristine PVP Ag	Pristine	40S ribosomal protein	Structural constituent of ribosome	Class V
778	Pristine PVP Ag	Pristine	40S ribosomal protein	RNA binding	Class V
779	Pristine PVP Ag	Pristine	40S ribosomal protein	RNA binding	Class V
780	Pristine PVP Ag	Pristine	40S ribosomal protein	Structural constituent of ribosome	Class V
781	Pristine PVP Ag	Pristine	40S ribosomal protein	Structural constituent of ribosome	Class V
782	Pristine PVP Ag	Pristine	40S ribosomal protein	RNA binding	Class V
783	Pristine PVP Ag	Pristine	40S ribosomal protein	Structural constituent of ribosome	Class V
784	Pristine PVP Ag	Pristine	40S ribosomal protein	Structural constituent of ribosome	Class V
785	Pristine PVP Ag	Pristine	40S ribosomal protein	Structural constituent of ribosome	Class V
786	Pristine PVP Ag	Pristine	40S ribosomal protein	Structural constituent of ribosome	Class V
787	Pristine PVP Ag	Pristine	40S ribosomal protein	rRNA binding	Class V
168	Pristine PVP Ag	Pristine	40S ribosomal protein	Structural constituent of ribosome	HH combo
169	Pristine PVP Ag	Pristine	40S ribosomal protein	Structural constituent of ribosome	HH combo
170	Pristine PVP Ag	Pristine	40S ribosomal protein	RNA binding	HH combo
171	Pristine PVP Ag	Pristine	40S ribosomal protein	RNA binding	HH combo
172	Pristine PVP Ag	Pristine	40S ribosomal protein	RNA binding	HH combo
173	Pristine PVP Ag	Pristine	40S ribosomal protein	Structural constituent of ribosome	HH combo
174	Pristine PVP Ag	Pristine	40S ribosomal protein	Structural constituent of ribosome	HH combo
175	Pristine PVP Ag	Pristine	40S ribosomal protein	RNA binding	HH combo
176	Pristine PVP Ag	Pristine	40S ribosomal protein	RNA binding	HH combo
177	Pristine PVP Ag	Pristine	40S ribosomal protein	Structural constituent of ribosome	HH combo
178	Pristine PVP Ag	Pristine	40S ribosomal protein	Structural constituent of ribosome	HH combo
179	Pristine PVP Ag	Pristine	40S ribosomal protein	rRNA binding	HH combo
788	Pristine PVP Ag	Pristine	50S ribosomal protein	Structural constituent of ribosome	Class V
180	Pristine PVP Ag	Pristine	60 kDa chaperonin	ATP binding	HH combo
789	Pristine PVP Ag	Pristine	60 kDa heat shock protein	ATP binding, protein refolding	Class V
181	Pristine PVP Ag	Pristine	60 kDa heat shock protein	ATP binding	HH combo
790	Pristine PVP Ag	Pristine	60S acidic ribosomal protein	Ribosome biogenesis	Class V
182	Pristine PVP Ag	Pristine	60S acidic ribosomal protein P0	Ribosome biogenesis	HH combo
183	Pristine PVP Ag	Pristine	60S ribosomal L14-like protein	Unreviewed	HH combo
791	Pristine PVP Ag	Pristine	60S ribosomal protein	Structural constituent of ribosome	Class V
792	Pristine PVP Ag	Pristine	60S ribosomal protein	Structural constituent of ribosome	Class V
793	Pristine PVP Ag	Pristine	60S ribosomal protein	Structural constituent of ribosome	Class V
794	Pristine PVP Ag	Pristine	60S ribosomal protein	Structural constituent of ribosome	Class V
795	Pristine PVP Ag	Pristine	60S ribosomal protein	Structural constituent of ribosome	Class V
796	Pristine PVP Ag	Pristine	60S ribosomal protein	Structural constituent of ribosome	Class V
797	Pristine PVP Ag	Pristine	60S ribosomal protein	Structural constituent of ribosome	Class V
798	Pristine PVP Ag	Pristine	60S ribosomal protein	Structural constituent of ribosome	Class V
799	Pristine PVP Ag	Pristine	60S ribosomal protein	Structural constituent of ribosome	Class V
800	Pristine PVP Ag	Pristine	60S ribosomal protein	Structural constituent of ribosome	Class V
801	Pristine PVP Ag	Pristine	60S ribosomal protein	Structural constituent of ribosome	Class V
802	Pristine PVP Ag	Pristine	60S ribosomal protein	Structural constituent of ribosome	Class V
803	Pristine PVP Ag	Pristine	60S ribosomal protein	Unreviewed	Class V
184	Pristine PVP Ag	Pristine	60S ribosomal protein	Structural constituent of ribosome	HH combo
185	Pristine PVP Ag	Pristine	60S ribosomal protein	Structural constituent of ribosome	HH combo
186	Pristine PVP Ag	Pristine	60S ribosomal protein	Structural constituent of ribosome	HH combo
187	Pristine PVP Ag	Pristine	60S ribosomal protein	Unreviewed	HH combo
188	Pristine PVP Ag	Pristine	60S ribosomal protein	Structural constituent of ribosome	HH combo
804	Pristine PVP Ag	Pristine	Actin, alpha skeletal muscle	ATP binding	Class V
189	Pristine PVP Ag	Pristine	Actin, alpha skeletal muscle	ATP binding	HH combo
805	Pristine PVP Ag	Pristine	ADP/ATP translocase	Transporter activitiy	Class V
190	Pristine PVP Ag	Pristine	ADP/ATP translocase	Transporter activity	HH combo
806	Pristine PVP Ag	Pristine	ADP-ribosylation factor	GTP binding	Class V
191	Pristine PVP Ag	Pristine	Aldehyde dehydrogenase	Oxidoreductase activity	HH combo
807	Pristine PVP Ag	Pristine	Alpha,alpha-trehalose-phosphate synthase	Catalytic activity	Class V
808	Pristine PVP Ag	Pristine	Apolipophorins	Lipid transporter activity	Class V
809	Pristine PVP Ag	Pristine	Apolipophorins	Lipid transporter activity	Class V
810	Pristine PVP Ag	Pristine	Apolipophorins	Lipid transporter activity	Class V
192	Pristine PVP Ag	Pristine	Apolipophorins	Lipid transporter activity	HH combo
193	Pristine PVP Ag	Pristine	Apolipophorins	Lipid transporter activity	HH combo
811	Pristine PVP Ag	Pristine	Apoptosis-inducing factor 1	Flavin adenine dinucleotide binding	Class V
812	Pristine PVP Ag	Pristine	ATP synthase subunit alpha	ATP binding	Class V
813	Pristine PVP Ag	Pristine	ATP synthase subunit alpha	ATP binding	Class V
194	Pristine PVP Ag	Pristine	ATP synthase subunit alpha	ATP binding	HH combo
814	Pristine PVP Ag	Pristine	ATP synthase subunit beta	ATP binding	Class V
815	Pristine PVP Ag	Pristine	ATP synthase subunit beta	ATP binding	Class V
195	Pristine PVP Ag	Pristine	ATP synthase subunit beta	ATP binding	HH combo
196	Pristine PVP Ag	Pristine	ATP synthase subunit beta	ATP binding	HH combo
816	Pristine PVP Ag	Pristine	ATP synthase subunit beta,	ATP binding	Class V
817	Pristine PVP Ag	Pristine	ATP synthase subunit O	ATP binding	Class V
197	Pristine PVP Ag	Pristine	Chemosensory protein 13	Unreviewed	HH combo
198	Pristine PVP Ag	Pristine	Chorion peroxidase	Heme binding	HH combo
199	Pristine PVP Ag	Pristine	Chorion peroxidase	Heme binding	HH combo
200	Pristine PVP Ag	Pristine	Chorion peroxidase	Heme binding	HH combo
818	Pristine PVP Ag	Pristine	Chymotrypsin elastase family member 2A	Serine-type endopeptidase activity	Class V
819	Pristine PVP Ag	Pristine	Citrate synthase	Transferase activity	Class V
820	Pristine PVP Ag	Pristine	Cleavage stimulation factor 64 kDa subunit	RNA binding	Class V
821	Pristine PVP Ag	Pristine	Clip-domain serine protease	Serine-type endopeptidase activity	Class V
201	Pristine PVP Ag	Pristine	Clip-domain serine protease	Serine-type endopeptidase activity	HH combo
202	Pristine PVP Ag	Pristine	Collagen alpha-5(VI) chain	Unreviewed	HH combo
203	Pristine PVP Ag	Pristine	COP9 signalosome complex subunit	Protein deneddylation	HH combo
822	Pristine PVP Ag	Pristine	Copper-zinc cu-zn superoxide dismutase	Serine-type endopeptidase activity	Class V
823	Pristine PVP Ag	Pristine	Copper-zinc cu-zn superoxide dismutase	Lipid transporter activity	Class V
824	Pristine PVP Ag	Pristine	Copper-zinc cu-zn superoxide dismutase	Lipid transporter activity	Class V
825	Pristine PVP Ag	Pristine	Copper-zinc cu-zn superoxide dismutase	Lipid transporter activity	Class V
826	Pristine PVP Ag	Pristine	Copper-zinc cu-zn superoxide dismutase	Lipid transporter activity	Class V
827	Pristine PVP Ag	Pristine	Copper-zinc cu-zn superoxide dismutase	Lipid transporter activity	Class V
828	Pristine PVP Ag	Pristine	Copper-zinc cu-zn superoxide dismutase	Lipid transporter activity	Class V
829	Pristine PVP Ag	Pristine	Copper-zinc cu-zn superoxide dismutase	Lipid transporter activity	Class V
830	Pristine PVP Ag	Pristine	Copper-zinc cu-zn superoxide dismutase	Lipid transporter activity	Class V
831	Pristine PVP Ag	Pristine	Copper-zinc cu-zn superoxide dismutase	Lipid transporter activity	Class V
832	Pristine PVP Ag	Pristine	Copper-zinc cu-zn superoxide dismutase	Lipid transporter activity	Class V
833	Pristine PVP Ag	Pristine	Copper-zinc cu-zn superoxide dismutase	Lipid transporter activity	Class V
834	Pristine PVP Ag	Pristine	Copper-zinc cu-zn superoxide dismutase	Lipid transporter activity	Class V
835	Pristine PVP Ag	Pristine	Copper-zinc cu-zn superoxide dismutase	Lipid transporter activity	Class V
836	Pristine PVP Ag	Pristine	Copper-zinc cu-zn superoxide dismutase	Lipid transporter activity	Class V
837	Pristine PVP Ag	Pristine	Copper-zinc cu-zn superoxide dismutase	Lipid transporter activity	Class V
838	Pristine PVP Ag	Pristine	Copper-zinc cu-zn superoxide dismutase	Lipid transporter activity	Class V
839	Pristine PVP Ag	Pristine	Copper-zinc cu-zn superoxide dismutase	Lipid transporter activity	Class V
840	Pristine PVP Ag	Pristine	Copper-zinc cu-zn superoxide dismutase	Lipid transporter activity	Class V
841	Pristine PVP Ag	Pristine	Copper-zinc cu-zn superoxide dismutase	Lipid transporter activity	Class V
842	Pristine PVP Ag	Pristine	Copper-zinc cu-zn superoxide dismutase	Lipid transporter activity	Class V
843	Pristine PVP Ag	Pristine	Copper-zinc cu-zn superoxide dismutase	Lipid transporter activity	Class V
844	Pristine PVP Ag	Pristine	Copper-zinc cu-zn superoxide dismutase	Lipid transporter activity	Class V
845	Pristine PVP Ag	Pristine	Copper-zinc cu-zn superoxide dismutase	Lipid transporter activity	Class V
846	Pristine PVP Ag	Pristine	Copper-zinc cu-zn superoxide dismutase	Lipid transporter activity	Class V
847	Pristine PVP Ag	Pristine	Copper-zinc cu-zn superoxide dismutase	Lipid transporter activity	Class V
204	Pristine PVP Ag	Pristine	Copper-zinc cu-zn superoxide dismutase	Lipid transporter activity	HH combo
205	Pristine PVP Ag	Pristine	Copper-zinc cu-zn superoxide dismutase	Lipid transporter activity	HH combo
206	Pristine PVP Ag	Pristine	Copper-zinc cu-zn superoxide dismutase	Lipid transporter activity	HH combo
207	Pristine PVP Ag	Pristine	Copper-zinc cu-zn superoxide dismutase	Lipid transporter activity	HH combo
208	Pristine PVP Ag	Pristine	Copper-zinc cu-zn superoxide dismutase	Lipid transporter activity	HH combo
209	Pristine PVP Ag	Pristine	Copper-zinc cu-zn superoxide dismutase	Lipid transporter activity	HH combo
210	Pristine PVP Ag	Pristine	Copper-zinc cu-zn superoxide dismutase	Lipid transporter activity	HH combo
211	Pristine PVP Ag	Pristine	Copper-zinc cu-zn superoxide dismutase	Lipid transporter activity	HH combo
212	Pristine PVP Ag	Pristine	Copper-zinc cu-zn superoxide dismutase	Lipid transporter activity	HH combo
213	Pristine PVP Ag	Pristine	Copper-zinc cu-zn superoxide dismutase	Lipid transporter activity	HH combo
214	Pristine PVP Ag	Pristine	Copper-zinc cu-zn superoxide dismutase	Lipid transporter activity	HH combo
215	Pristine PVP Ag	Pristine	Copper-zinc cu-zn superoxide dismutase	Lipid transporter activity	HH combo
216	Pristine PVP Ag	Pristine	Copper-zinc cu-zn superoxide dismutase	Lipid transporter activity	HH combo
217	Pristine PVP Ag	Pristine	Copper-zinc cu-zn superoxide dismutase	Lipid transporter activity	HH combo
218	Pristine PVP Ag	Pristine	Copper-zinc cu-zn superoxide dismutase	Lipid transporter activity	HH combo
219	Pristine PVP Ag	Pristine	Copper-zinc cu-zn superoxide dismutase	Lipid transporter activity	HH combo
220	Pristine PVP Ag	Pristine	Copper-zinc cu-zn superoxide dismutase	Lipid transporter activity	HH combo
221	Pristine PVP Ag	Pristine	Copper-zinc cu-zn superoxide dismutase	Lipid transporter activity	HH combo
222	Pristine PVP Ag	Pristine	Copper-zinc cu-zn superoxide dismutase	Lipid transporter activity	HH combo
848	Pristine PVP Ag	Pristine	Creatine kinase U-type, mitochondrial	ATP binding	Class V
223	Pristine PVP Ag	Pristine	Creatine kinase U-type, mitochondrial	Structural constituent of cuticle	HH combo
224	Pristine PVP Ag	Pristine	Cuticle protein	Chitin binding	HH combo
225	Pristine PVP Ag	Pristine	Cuticular protein analogous to peritrophins	Chitin binding	HH combo
226	Pristine PVP Ag	Pristine	Cuticular protein analogous to peritrophins	Chitin binding	HH combo
849	Pristine PVP Ag	Pristine	Cytochrome b-c1 complex subunit 1	Metal ion binding	Class V
850	Pristine PVP Ag	Pristine	Cytoplasmatic actin	Unreviewed	Class V
851	Pristine PVP Ag	Pristine	Di-domain hemoglobin	Heme binding	Class V
852	Pristine PVP Ag	Pristine	Di-domain hemoglobin	Heme binding	Class V
853	Pristine PVP Ag	Pristine	Di-domain hemoglobin	Heme binding	Class V
854	Pristine PVP Ag	Pristine	Di-domain hemoglobin	Heme binding	Class V
855	Pristine PVP Ag	Pristine	Di-domain hemoglobin	Heme binding	Class V
856	Pristine PVP Ag	Pristine	Di-domain hemoglobin	Heme binding	Class V
857	Pristine PVP Ag	Pristine	Di-domain hemoglobin	Heme binding	Class V
858	Pristine PVP Ag	Pristine	Di-domain hemoglobin	Heme binding	Class V
859	Pristine PVP Ag	Pristine	Di-domain hemoglobin	Heme binding	Class V
860	Pristine PVP Ag	Pristine	Di-domain hemoglobin	Heme binding	Class V
861	Pristine PVP Ag	Pristine	Di-domain hemoglobin	Heme binding	Class V
862	Pristine PVP Ag	Pristine	Di-domain hemoglobin	Heme binding	Class V
863	Pristine PVP Ag	Pristine	Di-domain hemoglobin	Heme binding	Class V
227	Pristine PVP Ag	Pristine	Di-domain hemoglobin	Heme binding	HH combo
228	Pristine PVP Ag	Pristine	Di-domain hemoglobin	Heme binding	HH combo
229	Pristine PVP Ag	Pristine	Di-domain hemoglobin	Heme binding	HH combo
230	Pristine PVP Ag	Pristine	Di-domain hemoglobin	Heme binding	HH combo
231	Pristine PVP Ag	Pristine	Di-domain hemoglobin	Heme binding	HH combo
232	Pristine PVP Ag	Pristine	Di-domain hemoglobin	Heme binding	HH combo
233	Pristine PVP Ag	Pristine	Di-domain hemoglobin	Heme binding	HH combo
234	Pristine PVP Ag	Pristine	Di-domain hemoglobin	Heme binding	HH combo
235	Pristine PVP Ag	Pristine	Di-domain hemoglobin	Heme binding	HH combo
236	Pristine PVP Ag	Pristine	Di-domain hemoglobin	Heme binding	HH combo
237	Pristine PVP Ag	Pristine	Di-domain hemoglobin	Heme binding	HH combo
238	Pristine PVP Ag	Pristine	Di-domain hemoglobin	Heme binding	HH combo
864	Pristine PVP Ag	Pristine	Di-domain hemoglobin-like protein	Heme binding	Class V
865	Pristine PVP Ag	Pristine	Di-domain hemoglobin-like protein	Heme binding	Class V
866	Pristine PVP Ag	Pristine	Di-domain hemoglobin-like protein	Heme binding	Class V
867	Pristine PVP Ag	Pristine	Dihydrolipoyllysine-residue succinyltransferase component of 2-oxoglutarate dehydrogenase complex	Dihydrolipoyllysine-residue succinyltransferase activity	Class V
239	Pristine PVP Ag	Pristine	DNA polymerase III subunits gamma and tau domain-containing protein	Unreviewed	HH combo
868	Pristine PVP Ag	Pristine	DnaJ subfamily A member	ATP binding	Class V
869	Pristine PVP Ag	Pristine	Double oxidase: two peroxidase domains	Heme binding	Class V
870	Pristine PVP Ag	Pristine	Double oxidase: two peroxidase domains	Heme binding	Class V
871	Pristine PVP Ag	Pristine	Elongation factor 1-alpha	GTP binding	Class V
872	Pristine PVP Ag	Pristine	Elongation factor 1-alpha	GTP binding	Class V
240	Pristine PVP Ag	Pristine	Elongation factor 1-alpha	GTP binding	HH combo
873	Pristine PVP Ag	Pristine	Elongation factor 1-delta	GTP binding	Class V
874	Pristine PVP Ag	Pristine	Elongation factor Tu	GTP binding	Class V
241	Pristine PVP Ag	Pristine	Elongation factor Tu	GTP binding	HH combo
242	Pristine PVP Ag	Pristine	Endocuticle structural glycoprotein SgAbd-2	Structural constituent of cuticle	HH combo
243	Pristine PVP Ag	Pristine	Endocuticle structural glycoprotein SgAbd-2	Structural constituent of cuticle	HH combo
244	Pristine PVP Ag	Pristine	Endocuticle structural glycoprotein SgAbd-2	Structural constituent of cuticle	HH combo
875	Pristine PVP Ag	Pristine	Eukaryotic initiation factor 4A-II	ATP binding	Class V
876	Pristine PVP Ag	Pristine	Eukaryotic translation initiation factor 2 subunit	Translation initiation factor activity	Class V
245	Pristine PVP Ag	Pristine	Ferric-chelate reductase	Unreviewed	HH combo
246	Pristine PVP Ag	Pristine	FK506-binding protein	FK506 binding	HH combo
877	Pristine PVP Ag	Pristine	Fragile X mental retardation syndrome-related protein	RNA binding	Class V
878	Pristine PVP Ag	Pristine	Glutamine synthetase	Glutamate-ammonia ligase activity	Class V
879	Pristine PVP Ag	Pristine	Gly d 3	Serine-type endopeptidase activity	Class V
247	Pristine PVP Ag	Pristine	Gly d 3	Serine-type endopeptidase activity	HH combo
880	Pristine PVP Ag	Pristine	Glyceraldehyde-3-phosphate dehydrogenase	NAD binding	Class V
248	Pristine PVP Ag	Pristine	Glyceraldehyde-3-phosphate dehydrogenase	Glyceraldehyde-3-phosphate dehydrogenase (NAD+) (phosphorylating) activity	HH combo
881	Pristine PVP Ag	Pristine	GMP reductase	GMP reductase activity	Class V
249	Pristine PVP Ag	Pristine	GMP reductase	Unreviewed	HH combo
250	Pristine PVP Ag	Pristine	GTP-binding nuclear protein	GTP binding	HH combo
882	Pristine PVP Ag	Pristine	Guanine nucleotide-binding protein subunit beta-2 1	Unreviewed	Class V
883	Pristine PVP Ag	Pristine	Heat shock 70 kDa protein cognate	ATP binding	Class V
884	Pristine PVP Ag	Pristine	Heat shock 70 kDa protein cognate	ATP binding	Class V
885	Pristine PVP Ag	Pristine	Heat shock 70 kDa protein cognate	ATP binding	Class V
251	Pristine PVP Ag	Pristine	Heat shock 70 kDa protein cognate	ATP binding	HH combo
252	Pristine PVP Ag	Pristine	Heat shock 70 kDa protein cognate	ATP binding	HH combo
886	Pristine PVP Ag	Pristine	Heat shock protein HSP 90-alpha	ATP binding	Class V
253	Pristine PVP Ag	Pristine	Heat shock protein HSP 90-alpha	ATP binding	HH combo
887	Pristine PVP Ag	Pristine	Hemoglobin	Heme binding	Class V
888	Pristine PVP Ag	Pristine	Hemoglobin	Heme binding	Class V
254	Pristine PVP Ag	Pristine	Hemoglobin	Heme binding	HH combo
255	Pristine PVP Ag	Pristine	Hemoglobin	Heme binding	HH combo
889	Pristine PVP Ag	Pristine	Histone H2A	DNA binding	Class V
256	Pristine PVP Ag	Pristine	Histone H2A	DNA binding	HH combo
890	Pristine PVP Ag	Pristine	Histone H4	DNA binding	Class V
257	Pristine PVP Ag	Pristine	Histone H4	DNA binding	HH combo
891	Pristine PVP Ag	Pristine	Importin subunit alpha-4	Protein transporter activity	Class V
258	Pristine PVP Ag	Pristine	Importin subunit alpha-4	Protein transporter activity	HH combo
892	Pristine PVP Ag	Pristine	Importin subunit beta-1	Ran GTPase binding	Class V
893	Pristine PVP Ag	Pristine	Inosine-5'-monophosphate dehydrogenase	IMP dehydrogenase activity	Class V
894	Pristine PVP Ag	Pristine	Isocitrate dehydrogenase [NADP]	Isocitrate dehydrogenase (NADP+) activity	Class V
259	Pristine PVP Ag	Pristine	Isocitrate dehydrogenase [NADP]	Isocitrate dehydrogenase (NADP+) activity	HH combo
260	Pristine PVP Ag	Pristine	Isocitrate dehydrogenase [NADP]	Isocitrate dehydrogenase (NADP+) activity	HH combo
895	Pristine PVP Ag	Pristine	Lamin-A	Structural molecule activity	Class V
261	Pristine PVP Ag	Pristine	Lethal (1) G0193	Unreviewed	HH combo
896	Pristine PVP Ag	Pristine	Lysosome-associated membrane glycoprotein	Unreviewed	Class V
897	Pristine PVP Ag	Pristine	Malate dehydrogenase	L-malate dehydrogenase activity	Class V
262	Pristine PVP Ag	Pristine	Mitotic apparatus protein p62	Unreviewed	HH combo
263	Pristine PVP Ag	Pristine	Mucin-17	Chitin binding	HH combo
898	Pristine PVP Ag	Pristine	N-alpha-acetyltransferase 15, NatA auxiliary subunit	Transferase activity	Class V
899	Pristine PVP Ag	Pristine	Nuclease domain-containing protein	Gene silencing by RNA	Class V
900	Pristine PVP Ag	Pristine	Nucleoside diphosphate kinase	ATP binding	Class V
264	Pristine PVP Ag	Pristine	Nucleoside diphosphate kinase	ATP binding	HH combo
265	Pristine PVP Ag	Pristine	Nucleoside diphosphate kinase	ATP binding	HH combo
901	Pristine PVP Ag	Pristine	Nucleosome assembly protein 1 4	Nucleosome assembly	Class V
266	Pristine PVP Ag	Pristine	Nucleosome assembly protein 1 4	ATP binding	HH combo
267	Pristine PVP Ag	Pristine	Peptidyl-prolyl cis-trans isomerase	Peptidyl-prolyl cis-trans isomerase activity	HH combo
268	Pristine PVP Ag	Pristine	Phosphoglycerate kinase	Phosphoglycerate kinase activity	HH combo
269	Pristine PVP Ag	Pristine	Poly(U)-specific endoribonuclease	Endoribonuclease activity	HH combo
902	Pristine PVP Ag	Pristine	Polyubiquitin-C	Unreviewed	Class V
903	Pristine PVP Ag	Pristine	Pre-mRNA-processing-splicing factor	U5 snRNA binding	Class V
270	Pristine PVP Ag	Pristine	Profilin	Actin binding	HH combo
271	Pristine PVP Ag	Pristine	Prohibitin-2	Unreviewed	HH combo
904	Pristine PVP Ag	Pristine	Proteasome subunit alpha type	Threonine-type endopeptidase activity	Class V
905	Pristine PVP Ag	Pristine	Protein arginine N-methyltransferase	Methyltransferase activity	Class V
906	Pristine PVP Ag	Pristine	Putative 116 kDa U5 small nuclear ribonucleoprotein component protein	GTP binding	Class V
272	Pristine PVP Ag	Pristine	Putative 116 kDa U5 small nuclear ribonucleoprotein component protein	GTP binding	HH combo
907	Pristine PVP Ag	Pristine	Putative 40S ribosomal protein	RNA binding	Class V
273	Pristine PVP Ag	Pristine	Putative 40S ribosomal protein	Structural constituent of ribosome	HH combo
908	Pristine PVP Ag	Pristine	Putative 60S acidic ribosomal protein	RNA binding	Class V
274	Pristine PVP Ag	Pristine	Putative 60S acidic ribosomal protein	Structural constituent of ribosome	HH combo
909	Pristine PVP Ag	Pristine	Putative 60S ribosomal protein	Structural constituent of ribosome	Class V
910	Pristine PVP Ag	Pristine	Putative 60S ribosomal protein	Structural constituent of ribosome	Class V
911	Pristine PVP Ag	Pristine	Putative 60S ribosomal protein	Unreviewed	Class V
275	Pristine PVP Ag	Pristine	Putative 60S ribosomal protein	Structural constituent of ribosome	HH combo
276	Pristine PVP Ag	Pristine	Putative 60S ribosomal protein	Structural constituent of ribosome	HH combo
277	Pristine PVP Ag	Pristine	Putative 60S ribosomal protein	Structural constituent of ribosome	HH combo
278	Pristine PVP Ag	Pristine	Putative 60S ribosomal protein	5S rRNA binding	HH combo
912	Pristine PVP Ag	Pristine	Putative Actin, alpha skeletal muscle	Unreviewed	Class V
279	Pristine PVP Ag	Pristine	Putative ADP-ribosylation factor	GTP binding	HH combo
280	Pristine PVP Ag	Pristine	Putative Ccp84Ae	Structural constituent of cuticle	HH combo
913	Pristine PVP Ag	Pristine	Putative Copper-zinc cu-zn superoxide dismutase	Lipid transporter activity	Class V
914	Pristine PVP Ag	Pristine	Putative Copper-zinc cu-zn superoxide dismutase	Lipid transporter activity	Class V
915	Pristine PVP Ag	Pristine	Putative Copper-zinc cu-zn superoxide dismutase	Lipid transporter activity	Class V
916	Pristine PVP Ag	Pristine	Putative Copper-zinc cu-zn superoxide dismutase	Lipid transporter activity	Class V
917	Pristine PVP Ag	Pristine	Putative Copper-zinc cu-zn superoxide dismutase	Lipid transporter activity	Class V
918	Pristine PVP Ag	Pristine	Putative Copper-zinc cu-zn superoxide dismutase	Lipid transporter activity	Class V
919	Pristine PVP Ag	Pristine	Putative Copper-zinc cu-zn superoxide dismutase	Lipid transporter activity	Class V
281	Pristine PVP Ag	Pristine	Putative Copper-zinc cu-zn superoxide dismutase	Lipid transporter activity	HH combo
282	Pristine PVP Ag	Pristine	Putative Copper-zinc cu-zn superoxide dismutase	Lipid transporter activity	HH combo
283	Pristine PVP Ag	Pristine	Putative Copper-zinc cu-zn superoxide dismutase	Lipid transporter activity	HH combo
284	Pristine PVP Ag	Pristine	Putative Copper-zinc cu-zn superoxide dismutase	Lipid transporter activity	HH combo
285	Pristine PVP Ag	Pristine	Putative Copper-zinc cu-zn superoxide dismutase	Lipid transporter activity	HH combo
286	Pristine PVP Ag	Pristine	Putative Copper-zinc cu-zn superoxide dismutase	Lipid transporter activity	HH combo
287	Pristine PVP Ag	Pristine	Putative Copper-zinc cu-zn superoxide dismutase	Lipid transporter activity	HH combo
288	Pristine PVP Ag	Pristine	Putative Copper-zinc cu-zn superoxide dismutase	Lipid transporter activity	HH combo
289	Pristine PVP Ag	Pristine	Putative Cuticle protein	Unreviewed	HH combo
920	Pristine PVP Ag	Pristine	Putative Cytochrome c oxidase subunit	Cytochrome-c oxidase activity	Class V
921	Pristine PVP Ag	Pristine	Putative di-domain hemoglobin	Heme binding	Class V
922	Pristine PVP Ag	Pristine	Putative di-domain hemoglobin	Heme binding	Class V
923	Pristine PVP Ag	Pristine	Putative di-domain hemoglobin	Heme binding	Class V
924	Pristine PVP Ag	Pristine	Putative di-domain hemoglobin	Heme binding	Class V
290	Pristine PVP Ag	Pristine	Putative di-domain hemoglobin	Heme binding	HH combo
291	Pristine PVP Ag	Pristine	Putative di-domain hemoglobin	Heme binding	HH combo
292	Pristine PVP Ag	Pristine	Putative di-domain hemoglobin	Heme binding	HH combo
293	Pristine PVP Ag	Pristine	Putative di-domain hemoglobin	Heme binding	HH combo
925	Pristine PVP Ag	Pristine	Putative Disulfide-isomerase	Heme binding	Class V
926	Pristine PVP Ag	Pristine	Putative Elongation factor 1-alpha	GTP binding	Class V
294	Pristine PVP Ag	Pristine	Putative Pollen-specific leucine-rich repeat extensin protein 1	Structural constituent of cuticle	HH combo
927	Pristine PVP Ag	Pristine	Putative Polyubiquitin-B	Unreviewed	Class V
295	Pristine PVP Ag	Pristine	Putative Serine/arginine-rich splicing factor	RNA binding	HH combo
928	Pristine PVP Ag	Pristine	Putative Vitelline membrane outer layer protein	Unreviewed	Class V
929	Pristine PVP Ag	Pristine	Putative Vitellogenin-1	Unreviewed	Class V
930	Pristine PVP Ag	Pristine	Putative Vitellogenin-1	Unreviewed	Class V
931	Pristine PVP Ag	Pristine	Putative Vitellogenin-1	Unreviewed	Class V
296	Pristine PVP Ag	Pristine	Putative Vitellogenin-1	Lipid transporter activity	HH combo
297	Pristine PVP Ag	Pristine	Putative Vitellogenin-1	Lipid transporter activity	HH combo
298	Pristine PVP Ag	Pristine	Putative Vitellogenin-1	Lipid transporter activity	HH combo
299	Pristine PVP Ag	Pristine	Putative Vitellogenin-1	Lipid transporter activity	HH combo
300	Pristine PVP Ag	Pristine	Putative Vitellogenin-1	Lipid transporter activity	HH combo
301	Pristine PVP Ag	Pristine	Pyruvate kinase	Kinase activity	HH combo
932	Pristine PVP Ag	Pristine	Ras-related protein Rab-8B	GTPase activity	Class V
302	Pristine PVP Ag	Pristine	Ras-related protein Rab-8B	GTP binding	HH combo
933	Pristine PVP Ag	Pristine	Ribosomal protein L15	Structural constituent of ribosome	Class V
303	Pristine PVP Ag	Pristine	Ribosomal protein L15	Structural constituent of ribosome	HH combo
934	Pristine PVP Ag	Pristine	Ribosome-releasing factor 2	GTP binfing	Class V
304	Pristine PVP Ag	Pristine	Ribosome-releasing factor 2	GTP binding	HH combo
935	Pristine PVP Ag	Pristine	Serine protease P76	Serine-type endopeptidase activity	Class V
305	Pristine PVP Ag	Pristine	Spz1	Unreviewed	HH combo
936	Pristine PVP Ag	Pristine	T-complex protein 1 subunit alpha	ATP binding	Class V
306	Pristine PVP Ag	Pristine	T-complex protein 1 subunit alpha	ATP binding	HH combo
937	Pristine PVP Ag	Pristine	T-complex protein 1 subunit beta	ATP binding	Class V
307	Pristine PVP Ag	Pristine	T-complex protein 1 subunit beta	ATP binding	HH combo
938	Pristine PVP Ag	Pristine	T-complex protein 1 subunit epsilon	ATP binding	Class V
939	Pristine PVP Ag	Pristine	T-complex protein 1 subunit eta	ATP binding	Class V
940	Pristine PVP Ag	Pristine	T-complex protein 1 subunit gamma	ATP binding	Class V
308	Pristine PVP Ag	Pristine	T-complex protein 1 subunit gamma	ATP binding	HH combo
941	Pristine PVP Ag	Pristine	T-complex protein 1 subunit theta	ATP binding	Class V
309	Pristine PVP Ag	Pristine	T-complex protein 1 subunit theta	ATP binding	HH combo
942	Pristine PVP Ag	Pristine	T-complex protein 1 subunit zeta	ATP binding	Class V
310	Pristine PVP Ag	Pristine	T-complex protein 1 subunit zeta	ATP binding	HH combo
943	Pristine PVP Ag	Pristine	Transitional endoplasmic reticulum ATPase TER94	ATP binding	Class V
311	Pristine PVP Ag	Pristine	Transitional endoplasmic reticulum ATPase TER94	ATP binding	HH combo
944	Pristine PVP Ag	Pristine	Transketolase	Catalytic	Class V
312	Pristine PVP Ag	Pristine	Translationally-controlled tumor protein	Unreviewed	HH combo
945	Pristine PVP Ag	Pristine	Trypsin 152	Serine-type endopeptidase activity	Class V
946	Pristine PVP Ag	Pristine	Tubulin alpha chain	GTP binding	Class V
947	Pristine PVP Ag	Pristine	Tubulin alpha chain	GTP binding	Class V
948	Pristine PVP Ag	Pristine	Tubulin alpha chain	GTP binding	Class V
949	Pristine PVP Ag	Pristine	Tubulin alpha chain	GTP binding	Class V
313	Pristine PVP Ag	Pristine	Tubulin alpha chain	GTP binding	HH combo
314	Pristine PVP Ag	Pristine	Tubulin alpha chain	GTP binding	HH combo
950	Pristine PVP Ag	Pristine	Tubulin beta chain	GTP binding	Class V
951	Pristine PVP Ag	Pristine	Tubulin beta chain	GTP binding	Class V
952	Pristine PVP Ag	Pristine	Tubulin beta chain	GTP binding	Class V
953	Pristine PVP Ag	Pristine	Tubulin beta chain	GTP binding	Class V
954	Pristine PVP Ag	Pristine	Tubulin beta chain	GTP binding	Class V
315	Pristine PVP Ag	Pristine	Tubulin beta chain	GTP binding	HH combo
316	Pristine PVP Ag	Pristine	Tubulin beta chain	GTP binding	HH combo
317	Pristine PVP Ag	Pristine	Tubulin beta chain	GTP binding	HH combo
955	Pristine PVP Ag	Pristine	Uncharacterized protein	Unreviewed	Class V
956	Pristine PVP Ag	Pristine	Uncharacterized protein	Unreviewed	Class V
957	Pristine PVP Ag	Pristine	Uncharacterized protein	Serine-type endopeptidase activity	Class V
958	Pristine PVP Ag	Pristine	Uncharacterized protein	Lipid transporter activity	Class V
959	Pristine PVP Ag	Pristine	Uncharacterized protein	Lipid transporter activity	Class V
960	Pristine PVP Ag	Pristine	Uncharacterized protein	Unreviewed	Class V
961	Pristine PVP Ag	Pristine	Uncharacterized protein	Unreviewed	Class V
962	Pristine PVP Ag	Pristine	Uncharacterized protein	Lipid transporter activity	Class V
963	Pristine PVP Ag	Pristine	Uncharacterized protein	Protein-chromophore linkage	Class V
964	Pristine PVP Ag	Pristine	Uncharacterized protein	Unreviewed	Class V
965	Pristine PVP Ag	Pristine	Uncharacterized protein	Unreviewed	Class V
966	Pristine PVP Ag	Pristine	Uncharacterized protein	Cysteine-type endopeptidase activity	Class V
967	Pristine PVP Ag	Pristine	Uncharacterized protein	Unreviewed	Class V
968	Pristine PVP Ag	Pristine	Uncharacterized protein	Nucleic acid binding	Class V
969	Pristine PVP Ag	Pristine	Uncharacterized protein	Serine-type endopeptidase activity	Class V
970	Pristine PVP Ag	Pristine	Uncharacterized protein	Unreviewed	Class V
971	Pristine PVP Ag	Pristine	Uncharacterized protein	Lipid transporter activity	Class V
972	Pristine PVP Ag	Pristine	Uncharacterized protein	Lipid transporter activity	Class V
973	Pristine PVP Ag	Pristine	Uncharacterized protein	Lipid transporter activity	Class V
974	Pristine PVP Ag	Pristine	Uncharacterized protein	Lipid transporter activity	Class V
975	Pristine PVP Ag	Pristine	Uncharacterized protein	Unreviewed	Class V
976	Pristine PVP Ag	Pristine	Uncharacterized protein	Unreviewed	Class V
977	Pristine PVP Ag	Pristine	Uncharacterized protein	Unreviewed	Class V
978	Pristine PVP Ag	Pristine	Uncharacterized protein	Unreviewed	Class V
979	Pristine PVP Ag	Pristine	Uncharacterized protein	Unreviewed	Class V
980	Pristine PVP Ag	Pristine	Uncharacterized protein	Unreviewed	Class V
981	Pristine PVP Ag	Pristine	Uncharacterized protein	Unreviewed	Class V
982	Pristine PVP Ag	Pristine	Uncharacterized protein	Unreviewed	Class V
983	Pristine PVP Ag	Pristine	Uncharacterized protein	Structural constituent of cuticle	Class V
984	Pristine PVP Ag	Pristine	Uncharacterized protein	DNA binding	Class V
985	Pristine PVP Ag	Pristine	Uncharacterized protein	Lipid transporter activity	Class V
986	Pristine PVP Ag	Pristine	Uncharacterized protein	Peroxiredoxin activity	Class V
987	Pristine PVP Ag	Pristine	Uncharacterized protein	Unreviewed	Class V
988	Pristine PVP Ag	Pristine	Uncharacterized protein	Lipid transporter activity	Class V
989	Pristine PVP Ag	Pristine	Uncharacterized protein	Unreviewed	Class V
990	Pristine PVP Ag	Pristine	Uncharacterized protein	Peroxiredoxin activity	Class V
991	Pristine PVP Ag	Pristine	Uncharacterized protein	Lipid transporter activity	Class V
992	Pristine PVP Ag	Pristine	Uncharacterized protein	Heme binding	Class V
993	Pristine PVP Ag	Pristine	Uncharacterized protein	Lipid transporter activity	Class V
994	Pristine PVP Ag	Pristine	Uncharacterized protein	Structural constituent of ribosome	Class V
995	Pristine PVP Ag	Pristine	Uncharacterized protein	Lyase activity	Class V
996	Pristine PVP Ag	Pristine	Uncharacterized protein	RNA binding	Class V
997	Pristine PVP Ag	Pristine	Uncharacterized protein	Heme binding	Class V
998	Pristine PVP Ag	Pristine	Uncharacterized protein	Unreviewed	Class V
318	Pristine PVP Ag	Pristine	Uncharacterized protein	Integral component of membrane	HH combo
319	Pristine PVP Ag	Pristine	Uncharacterized protein	Unreviewed	HH combo
320	Pristine PVP Ag	Pristine	Uncharacterized protein	Unreviewed	HH combo
321	Pristine PVP Ag	Pristine	Uncharacterized protein	Unreviewed	HH combo
322	Pristine PVP Ag	Pristine	Uncharacterized protein	Defense response	HH combo
323	Pristine PVP Ag	Pristine	Uncharacterized protein	Integral component of membrane	HH combo
324	Pristine PVP Ag	Pristine	Uncharacterized protein	Lipid transporter activity	HH combo
325	Pristine PVP Ag	Pristine	Uncharacterized protein	Lipid transporter activity	HH combo
326	Pristine PVP Ag	Pristine	Uncharacterized protein	Lipid transporter activity	HH combo
327	Pristine PVP Ag	Pristine	Uncharacterized protein	Lipid transporter activity	HH combo
328	Pristine PVP Ag	Pristine	Uncharacterized protein	Lipid transporter activity	HH combo
329	Pristine PVP Ag	Pristine	Uncharacterized protein	Lipid transporter activity	HH combo
330	Pristine PVP Ag	Pristine	Uncharacterized protein	Lipid transporter activity	HH combo
331	Pristine PVP Ag	Pristine	Uncharacterized protein	Lipid transporter activity	HH combo
332	Pristine PVP Ag	Pristine	Uncharacterized protein	Lipid transporter activity	HH combo
333	Pristine PVP Ag	Pristine	Uncharacterized protein	Lipid transporter activity	HH combo
334	Pristine PVP Ag	Pristine	Uncharacterized protein	Metal ion binding	HH combo
335	Pristine PVP Ag	Pristine	Uncharacterized protein	Peroxiredoxin activity	HH combo
336	Pristine PVP Ag	Pristine	Uncharacterized protein	Structural constituent of cuticle	HH combo
337	Pristine PVP Ag	Pristine	Uncharacterized protein	Structural constituent of cuticle	HH combo
338	Pristine PVP Ag	Pristine	Uncharacterized protein	Structural constituent of cuticle	HH combo
339	Pristine PVP Ag	Pristine	Uncharacterized protein	Structural constituent of cuticle	HH combo
340	Pristine PVP Ag	Pristine	Uncharacterized protein	Structural constituent of cuticle	HH combo
341	Pristine PVP Ag	Pristine	Uncharacterized protein	Structural constituent of cuticle	HH combo
342	Pristine PVP Ag	Pristine	Uncharacterized protein	Structural constituent of cuticle	HH combo
343	Pristine PVP Ag	Pristine	Uncharacterized protein	Structural constituent of cuticle	HH combo
344	Pristine PVP Ag	Pristine	Uncharacterized protein	Structural constituent of cuticle	HH combo
345	Pristine PVP Ag	Pristine	Uncharacterized protein	Structural constituent of cuticle	HH combo
346	Pristine PVP Ag	Pristine	Uncharacterized protein	Structural constituent of cuticle	HH combo
347	Pristine PVP Ag	Pristine	Uncharacterized protein	Structural constituent of cuticle	HH combo
348	Pristine PVP Ag	Pristine	Uncharacterized protein	Structural constituent of cuticle	HH combo
349	Pristine PVP Ag	Pristine	Uncharacterized protein	Structural constituent of ribosome	HH combo
350	Pristine PVP Ag	Pristine	Uncharacterized protein	Unreviewed	HH combo
351	Pristine PVP Ag	Pristine	Uncharacterized protein	Unreviewed	HH combo
352	Pristine PVP Ag	Pristine	Uncharacterized protein	Unreviewed	HH combo
353	Pristine PVP Ag	Pristine	Uncharacterized protein	Unreviewed	HH combo
354	Pristine PVP Ag	Pristine	Uncharacterized protein	Unreviewed	HH combo
355	Pristine PVP Ag	Pristine	Uncharacterized protein	Unreviewed	HH combo
356	Pristine PVP Ag	Pristine	Uncharacterized protein	Unreviewed	HH combo
357	Pristine PVP Ag	Pristine	Uncharacterized protein	Unreviewed	HH combo
358	Pristine PVP Ag	Pristine	Uncharacterized protein	Unreviewed	HH combo
359	Pristine PVP Ag	Pristine	Uncharacterized protein	Unreviewed	HH combo
360	Pristine PVP Ag	Pristine	Uncharacterized protein	Unreviewed	HH combo
361	Pristine PVP Ag	Pristine	Uncharacterized protein	Unreviewed	HH combo
362	Pristine PVP Ag	Pristine	Uncharacterized protein	Unreviewed	HH combo
363	Pristine PVP Ag	Pristine	Uncharacterized protein	Unreviewed	HH combo
364	Pristine PVP Ag	Pristine	Uncharacterized protein	Unreviewed	HH combo
365	Pristine PVP Ag	Pristine	Uncharacterized protein	Unreviewed	HH combo
366	Pristine PVP Ag	Pristine	Uncharacterized protein	Unreviewed	HH combo
367	Pristine PVP Ag	Pristine	Uncharacterized protein	Unreviewed	HH combo
368	Pristine PVP Ag	Pristine	Uncharacterized protein	Unreviewed	HH combo
369	Pristine PVP Ag	Pristine	Uncharacterized protein	Unreviewed	HH combo
370	Pristine PVP Ag	Pristine	Uncharacterized protein	Unreviewed	HH combo
999	Pristine PVP Ag	Pristine	Vitellogenin fused with superoxide dismutase	Lipid transporter activity	Class V
371	Pristine PVP Ag	Pristine	Vitellogenin fused with superoxide dismutase	Copper ion binding	HH combo
372	Pristine PVP Ag	Pristine	Vitellogenin fused with superoxide dismutase	Copper ion binding	HH combo
1000	Pristine PVP Ag	Pristine	Vitellogenin-1	Lipid transporter activity	Class V
1001	Pristine PVP Ag	Pristine	Vitellogenin-1	Lipid transporter activity	Class V
1002	Pristine PVP Ag	Pristine	Vitellogenin-1	Lipid transporter activity	Class V
1003	Pristine PVP Ag	Pristine	Vitellogenin-1	Lipid transporter activity	Class V
1004	Pristine PVP Ag	Pristine	Vitellogenin-1	Lipid transporter activity	Class V
373	Pristine PVP Ag	Pristine	Vitellogenin-1	Lipid transporter activity	HH combo
374	Pristine PVP Ag	Pristine	Vitellogenin-1	Lipid transporter activity	HH combo
375	Pristine PVP Ag	Pristine	Vitellogenin-1	Lipid transporter activity	HH combo
376	Pristine PVP Ag	Pristine	Vitellogenin-1	Lipid transporter activity	HH combo
377	Pristine PVP Ag	Pristine	Vitellogenin-1	Lipid transporter activity	HH combo
378	Pristine PVP Ag	Pristine	Vitellogenin-1	Lipid transporter activity	HH combo
379	Pristine PVP Ag	Pristine	Vitellogenin-1	Lipid transporter activity	HH combo
380	Pristine PVP Ag	Pristine	Vitellogenin-1	Lipid transporter activity	HH combo
381	Pristine PVP Ag	Pristine	Vitellogenin-1	Lipid transporter activity	HH combo
382	Pristine PVP Ag	Pristine	Vitellogenin-1	Lipid transporter activity	HH combo
383	Pristine PVP Ag	Pristine	Vitellogenin-1	Lipid transporter activity	HH combo
384	Pristine PVP Ag	Pristine	Vitellogenin-1	Lipid transporter activity	HH combo
385	Pristine PVP Ag	Pristine	Vitellogenin-1	Lipid transporter activity	HH combo
386	Pristine PVP Ag	Pristine	Vitellogenin-1	Lipid transporter activity	HH combo
1005	Pristine PVP Ag	Pristine	Vitellogenin-1-like protein	Unreviewed	Class V
1006	Pristine PVP Ag	Pristine	Vitellogenin-1-like protein	Unreviewed	Class V
1007	Pristine PVP Ag	Pristine	Vitellogenin-1-like protein	Unreviewed	Class V
1008	Pristine PVP Ag	Pristine	Voltage-dependent anion-selective channel protein	Voltage-gated anion channel activity	Class V
387	Pristine PVP Ag	Pristine	Voltage-dependent anion-selective channel protein	Voltage-gated anion channel activity	HH combo
1009	Pristine PVP Ag	Pristine	Xaa-Pro aminopeptidase	Metal ion binding	Class V
1010	Pristine PVP Ag	Pristine	Zinc finger protein Gfi-1b	Nucleic acid binding	Class V
404	Pristine TiO2 PVP	Pristine	40S ribosomal protein S5	RNA binding	HH combo
400	Pristine TiO2 PVP	Pristine	60S ribosomal protein	Structural constituent of ribosome	HH combo
393	Pristine TiO2 PVP	Pristine	60S ribosomal protein L13	Structural constituent of ribosome	HH combo
425	Pristine TiO2 PVP	Pristine	Actin, alpha skeletal muscle	ATP binding	HH combo
395	Pristine TiO2 PVP	Pristine	ADP-ribosylation factor	GTP binding	HH combo
392	Pristine TiO2 PVP	Pristine	ATP synthase subunit alpha	ATP binding	HH combo
412	Pristine TiO2 PVP	Pristine	ATP synthase subunit alpha	ATP binding	HH combo
422	Pristine TiO2 PVP	Pristine	ATP synthase subunit alpha	ATP binding	HH combo
416	Pristine TiO2 PVP	Pristine	ATP synthase subunit beta	ATP binding, proton-transporting ATP synthase activity	HH combo
421	Pristine TiO2 PVP	Pristine	ATP synthase subunit beta	ATP binding	HH combo
431	Pristine TiO2 PVP	Pristine	ATP-dependent RNA helicase DDX23	ATP binding	HH combo
428	Pristine TiO2 PVP	Pristine	ATP-dependent zinc metalloprotease YME1L1	ATP binding	HH combo
432	Pristine TiO2 PVP	Pristine	Carbamoyl-phosphate synthase large chain	ATP binding	HH combo
430	Pristine TiO2 PVP	Pristine	Chaperone protein ClpB	ATP binding	HH combo
417	Pristine TiO2 PVP	Pristine	Chymotrypsin BI	Serine-type endopeptidase activity	HH combo
434	Pristine TiO2 PVP	Pristine	Copper-zinc cu-zn superoxide dismutase	Lipid transporter activity	HH combo
397	Pristine TiO2 PVP	Pristine	Cysteine synthase	Cysteine synthase activity	HH combo
424	Pristine TiO2 PVP	Pristine	Elongation factor 1-alpha	GTP binding	HH combo
406	Pristine TiO2 PVP	Pristine	Elongation factor Tu	GTP binding	HH combo
411	Pristine TiO2 PVP	Pristine	Eukaryotic initiation factor 4A-II	ATP binding	HH combo
414	Pristine TiO2 PVP	Pristine	Fructose-bisphosphate aldolase	Fructose-bisphosphate aldolase activity	HH combo
409	Pristine TiO2 PVP	Pristine	Gly d 3	Serine-type endopeptidase activity	HH combo
402	Pristine TiO2 PVP	Pristine	GTP-binding nuclear protein	GTP binding	HH combo
398	Pristine TiO2 PVP	Pristine	Guanine nucleotide-binding protein subunit beta-2 1	Unreviewed	HH combo
423	Pristine TiO2 PVP	Pristine	Heat shock 70 kDa protein cognate	ATP binding	HH combo
427	Pristine TiO2 PVP	Pristine	Heat shock 70 kDa protein cognate	ATP binding	HH combo
429	Pristine TiO2 PVP	Pristine	Heat shock protein HSP 90-alpha	ATP binding	HH combo
394	Pristine TiO2 PVP	Pristine	Histone H2A	DNA binding	HH combo
396	Pristine TiO2 PVP	Pristine	Histone H2B	DNA binding	HH combo
405	Pristine TiO2 PVP	Pristine	Histone H4	DNA binding	HH combo
420	Pristine TiO2 PVP	Pristine	Isocitrate dehydrogenase [NADP]	Isocitrate dehydrogenase (NADP+) activity	HH combo
408	Pristine TiO2 PVP	Pristine	NADH dehydrogenase [ubiquinone] iron-sulfur protein 7	4 iron, 4 sulfur cluster binding, metal ion binding	HH combo
426	Pristine TiO2 PVP	Pristine	Oxysterol-binding protein	Unreviewed	HH combo
388	Pristine TiO2 PVP	Pristine	Putative 40S ribosomal protein	Structural constituent of ribosome	HH combo
389	Pristine TiO2 PVP	Pristine	Putative 40S ribosomal protein	Structural constituent of ribosome	HH combo
410	Pristine TiO2 PVP	Pristine	Putative 60S ribosomal protein L4-A	Structural constituent of ribosome	HH combo
399	Pristine TiO2 PVP	Pristine	Putative Disulfide-isomerase	Isomerase activity	HH combo
391	Pristine TiO2 PVP	Pristine	Putative Elongation factor 1-alpha	GTP binding	HH combo
403	Pristine TiO2 PVP	Pristine	Ras-related protein Rab-11B	GTP binding	HH combo
418	Pristine TiO2 PVP	Pristine	Tubulin alpha chain	GTP binding	HH combo
415	Pristine TiO2 PVP	Pristine	Tubulin beta chain	GTP binding	HH combo
419	Pristine TiO2 PVP	Pristine	Tubulin beta chain	GTP binding	HH combo
390	Pristine TiO2 PVP	Pristine	Uncharacterized protein	Unreviewed	HH combo
401	Pristine TiO2 PVP	Pristine	Uncharacterized protein	Unreviewed	HH combo
407	Pristine TiO2 PVP	Pristine	Uncharacterized protein	Unreviewed	HH combo
413	Pristine TiO2 PVP	Pristine	Uncharacterized protein	GTP binding	HH combo
433	Pristine TiO2 PVP	Pristine	Vascular endothelial growth factor receptor	ATP binding	HH combo
435	Pristine TiO2 PVP	Pristine	Zormin	Unreviewed	HH combo
1016	Pristine TiO2 Uncoated	Pristine	30S ribosomal protein	mRNA binding	Class V
1017	Pristine TiO2 Uncoated	Pristine	40S ribosomal protein	Structural constituent of ribosome	Class V
438	Pristine TiO2 Uncoated	Pristine	40S ribosomal protein	Structural constituent of ribosome	HH combo
442	Pristine TiO2 Uncoated	Pristine	40S ribosomal protein	Metal ion binding	HH combo
447	Pristine TiO2 Uncoated	Pristine	40S ribosomal protein	Translation	HH combo
450	Pristine TiO2 Uncoated	Pristine	40S ribosomal protein	Metal ion binding	HH combo
446	Pristine TiO2 Uncoated	Pristine	60S acidic ribosomal protein	Translational elongation	HH combo
444	Pristine TiO2 Uncoated	Pristine	ADP-ribosylation factor	GTP binding	HH combo
465	Pristine TiO2 Uncoated	Pristine	ATP synthase subunit alpha	ATP binding	HH combo
1014	Pristine TiO2 Uncoated	Pristine	ATP synthase subunit beta	ATP binding	Class V
1020	Pristine TiO2 Uncoated	Pristine	ATP synthase subunit beta	ATP binding	Class V
464	Pristine TiO2 Uncoated	Pristine	ATP synthase subunit beta	ATP binding	HH combo
459	Pristine TiO2 Uncoated	Pristine	ATP-dependent RNA helicase	ATP binding	HH combo
460	Pristine TiO2 Uncoated	Pristine	ATP-dependent RNA helicase	ATP binding	HH combo
468	Pristine TiO2 Uncoated	Pristine	Calcium-transporting ATPase type 2C member	Nucleotide binding	HH combo
1021	Pristine TiO2 Uncoated	Pristine	Calcium-transporting ATPase type 2C member-like protein	Nucleotide binding	Class V
1022	Pristine TiO2 Uncoated	Pristine	Calcium-transporting ATPase type 2C member-like protein	Nucleotide binding	Class V
456	Pristine TiO2 Uncoated	Pristine	Chymotrypsin BI	Serine-type endopeptidase activity	HH combo
1024	Pristine TiO2 Uncoated	Pristine	Copper-zinc cu-zn superoxide dismutase	Lipid transporter activity	Class V
454	Pristine TiO2 Uncoated	Pristine	Elongation factor Tu	GTP binding	HH combo
461	Pristine TiO2 Uncoated	Pristine	Eukaryotic initiation factor 4A-II	ATP binding	HH combo
448	Pristine TiO2 Uncoated	Pristine	GTP-binding nuclear protein	GTP binding	HH combo
466	Pristine TiO2 Uncoated	Pristine	Heat shock 70 kDa protein cognate	ATP binding	HH combo
1015	Pristine TiO2 Uncoated	Pristine	Histone H2A	DNA binding	Class V
443	Pristine TiO2 Uncoated	Pristine	Histone H2A	DNA binding	HH combo
445	Pristine TiO2 Uncoated	Pristine	Histone H2B	DNA binding	HH combo
1018	Pristine TiO2 Uncoated	Pristine	Histone H4	DNA binding	Class V
451	Pristine TiO2 Uncoated	Pristine	Histone H4	DNA binding	HH combo
458	Pristine TiO2 Uncoated	Pristine	Isocitrate dehydrogenase [NADP]	Isocitrate dehydrogenase (NADP+) activity	HH combo
462	Pristine TiO2 Uncoated	Pristine	Isocitrate dehydrogenase [NADP]	Isocitrate dehydrogenase (NADP+) activity	HH combo
439	Pristine TiO2 Uncoated	Pristine	Peptidyl-prolyl cis-trans isomerase	Peptidyl-prolyl cis-trans isomerase activity	HH combo
467	Pristine TiO2 Uncoated	Pristine	Polyadenylate-binding protein	RNA binding	HH combo
452	Pristine TiO2 Uncoated	Pristine	Putative ATP synthase subunit alpha	ATP binding	HH combo
1013	Pristine TiO2 Uncoated	Pristine	Putative Elongation factor 1-alpha	GTP binding	Class V
440	Pristine TiO2 Uncoated	Pristine	Putative Elongation factor 1-alpha	GTP binding	HH combo
457	Pristine TiO2 Uncoated	Pristine	Putative Heat shock protein HSP 90-alpha	ATP binding	HH combo
449	Pristine TiO2 Uncoated	Pristine	Ras-related protein Rab-11B	GTP binding	HH combo
453	Pristine TiO2 Uncoated	Pristine	S-adenosylmethionine synthase	Methionine adenosyltransferase activity	HH combo
437	Pristine TiO2 Uncoated	Pristine	TP synthase subunit beta, mitochondrial-like protein	ATP binding	HH combo
469	Pristine TiO2 Uncoated	Pristine	Transitional endoplasmic reticulum ATPase TER94	ATP binding	HH combo
455	Pristine TiO2 Uncoated	Pristine	Tubulin beta chain	GTP binding	HH combo
1011	Pristine TiO2 Uncoated	Pristine	Uncharacterized protein	Protein-chromophore linkage	Class V
1012	Pristine TiO2 Uncoated	Pristine	Uncharacterized protein	Integral component of membrane	Class V
1019	Pristine TiO2 Uncoated	Pristine	Uncharacterized protein	Protein-chromophore linkage	Class V
436	Pristine TiO2 Uncoated	Pristine	Uncharacterized protein	Protein-chromophore linkage	HH combo
441	Pristine TiO2 Uncoated	Pristine	Uncharacterized protein	Unreviewed	HH combo
463	Pristine TiO2 Uncoated	Pristine	Uncharacterized protein	Unreviewed	HH combo
1023	Pristine TiO2 Uncoated	Pristine	Vitellogenin-1	Lipid transporter activity	Class V
86	Pristine Uncoated Ag	Pristine	Actin, alpha skeletal muscle	ATP binding	HH combo
87	Pristine Uncoated Ag	Pristine	ATP synthase subunit beta	ATP binding	HH combo
88	Pristine Uncoated Ag	Pristine	ATP synthase subunit beta	ATP binding	HH combo
141	Pristine Uncoated Ag	Pristine	Chemosensory protein 13	Unreviewed	HH combo
107	Pristine Uncoated Ag	Pristine	Chorion peroxidase	Heme binding	HH combo
108	Pristine Uncoated Ag	Pristine	Chorion peroxidase	Heme binding	HH combo
109	Pristine Uncoated Ag	Pristine	Chorion peroxidase	Heme binding	HH combo
110	Pristine Uncoated Ag	Pristine	Chorion peroxidase	Heme binding	HH combo
118	Pristine Uncoated Ag	Pristine	Clip-domain serine protease	Serine-type endopeptidase activity	HH combo
119	Pristine Uncoated Ag	Pristine	Clip-domain serine protease	Serine-type endopeptidase activity	HH combo
89	Pristine Uncoated Ag	Pristine	C-type lectin ctl-galactose binding	Carbohydrate binding	HH combo
90	Pristine Uncoated Ag	Pristine	Cuticle protein	Chitin binding	HH combo
91	Pristine Uncoated Ag	Pristine	Cuticle protein	Chitin binding	HH combo
92	Pristine Uncoated Ag	Pristine	Cuticle protein	Chitin binding	HH combo
93	Pristine Uncoated Ag	Pristine	Cuticle protein	Chitin binding	HH combo
94	Pristine Uncoated Ag	Pristine	Cuticle protein	Chitin binding	HH combo
95	Pristine Uncoated Ag	Pristine	Cuticular protein	Chitin binding	HH combo
96	Pristine Uncoated Ag	Pristine	Cuticular protein analogous to peritrophins	Chitin binding	HH combo
97	Pristine Uncoated Ag	Pristine	Cuticular protein analogous to peritrophins	Chitin binding	HH combo
98	Pristine Uncoated Ag	Pristine	Cuticular protein analogous to peritrophins	Chitin binding	HH combo
99	Pristine Uncoated Ag	Pristine	Cuticular protein analogous to peritrophins	Chitin binding	HH combo
111	Pristine Uncoated Ag	Pristine	Double oxidase: two peroxidase domains	Heme binding	HH combo
104	Pristine Uncoated Ag	Pristine	Elongation factor 1-alpha	GTP binding	HH combo
105	Pristine Uncoated Ag	Pristine	Elongation factor Tu	GTP binding	HH combo
122	Pristine Uncoated Ag	Pristine	Endocuticle structural glycoprotein SgAbd-2	Structural constituent of cuticle	HH combo
120	Pristine Uncoated Ag	Pristine	Gly d 3	Serine-type endopeptidase activity	HH combo
102	Pristine Uncoated Ag	Pristine	Histone H4	DNA binding	HH combo
100	Pristine Uncoated Ag	Pristine	Mucin-17	Chitin binding	HH combo
101	Pristine Uncoated Ag	Pristine	Obstructor-A	Chitin binding	HH combo
123	Pristine Uncoated Ag	Pristine	Putative Ccp84Ae	Structural constituent of cuticle	HH combo
124	Pristine Uncoated Ag	Pristine	Putative Cuticle protein	Structural constituent of cuticle	HH combo
103	Pristine Uncoated Ag	Pristine	Putative Galactose-3-O-sulfotransferase 2	Galactosylceramide sulfotransferase activity	HH combo
125	Pristine Uncoated Ag	Pristine	Putative Pupal cuticle protein	Structural constituent of cuticle	HH combo
121	Pristine Uncoated Ag	Pristine	Serine protease inhibitor	Serine-type endopeptidase inhibitor activity	HH combo
142	Pristine Uncoated Ag	Pristine	Spz1	Unreviewed	HH combo
117	Pristine Uncoated Ag	Pristine	Superoxide dismutase	Metal ion binding	HH combo
106	Pristine Uncoated Ag	Pristine	Tubulin beta chain	GTP binding	HH combo
112	Pristine Uncoated Ag	Pristine	Uncharacterized protein	Integral component of membrane	HH combo
113	Pristine Uncoated Ag	Pristine	Uncharacterized protein	Integral component of membrane	HH combo
114	Pristine Uncoated Ag	Pristine	Uncharacterized protein	Integral component of membrane	HH combo
115	Pristine Uncoated Ag	Pristine	Uncharacterized protein	Integral component of membrane	HH combo
116	Pristine Uncoated Ag	Pristine	Uncharacterized protein	Integral component of membrane	HH combo
126	Pristine Uncoated Ag	Pristine	Uncharacterized protein	Structural constituent of cuticle	HH combo
127	Pristine Uncoated Ag	Pristine	Uncharacterized protein	Structural constituent of cuticle	HH combo
128	Pristine Uncoated Ag	Pristine	Uncharacterized protein	Structural constituent of cuticle	HH combo
129	Pristine Uncoated Ag	Pristine	Uncharacterized protein	Structural constituent of cuticle	HH combo
130	Pristine Uncoated Ag	Pristine	Uncharacterized protein	Structural constituent of cuticle	HH combo
131	Pristine Uncoated Ag	Pristine	Uncharacterized protein	Structural constituent of cuticle	HH combo
132	Pristine Uncoated Ag	Pristine	Uncharacterized protein	Structural constituent of cuticle	HH combo
133	Pristine Uncoated Ag	Pristine	Uncharacterized protein	Structural constituent of cuticle	HH combo
134	Pristine Uncoated Ag	Pristine	Uncharacterized protein	Structural constituent of cuticle	HH combo
135	Pristine Uncoated Ag	Pristine	Uncharacterized protein	Structural constituent of cuticle	HH combo
136	Pristine Uncoated Ag	Pristine	Uncharacterized protein	Structural constituent of cuticle	HH combo
137	Pristine Uncoated Ag	Pristine	Uncharacterized protein	Structural constituent of cuticle	HH combo
138	Pristine Uncoated Ag	Pristine	Uncharacterized protein	Structural constituent of cuticle	HH combo
139	Pristine Uncoated Ag	Pristine	Uncharacterized protein	Structural constituent of cuticle	HH combo
140	Pristine Uncoated Ag	Pristine	Uncharacterized protein	Structural constituent of ribosome	HH combo
143	Pristine Uncoated Ag	Pristine	Uncharacterized protein	Unreviewed	HH combo
144	Pristine Uncoated Ag	Pristine	Uncharacterized protein	Unreviewed	HH combo
145	Pristine Uncoated Ag	Pristine	Uncharacterized protein	Unreviewed	HH combo
146	Pristine Uncoated Ag	Pristine	Uncharacterized protein	Unreviewed	HH combo
147	Pristine Uncoated Ag	Pristine	Uncharacterized protein	Unreviewed	HH combo
148	Pristine Uncoated Ag	Pristine	Uncharacterized protein	Unreviewed	HH combo
149	Pristine Uncoated Ag	Pristine	Uncharacterized protein	Unreviewed	HH combo
150	Pristine Uncoated Ag	Pristine	Uncharacterized protein	Unreviewed	HH combo
151	Pristine Uncoated Ag	Pristine	Uncharacterized protein	Unreviewed	HH combo
152	Pristine Uncoated Ag	Pristine	Uncharacterized protein	Unreviewed	HH combo
[truncated: 12 more rows]
